# Supplementary material
Source: publisher figshare collection journal article supplement (https://karger.figshare.com/articles/dataset/_/5104426)
Supplement: Supplementary file 1 [file 1]

**Genes expressed in all microglia cultures**

| GB code  | Title                                                                                     | Mean Expression value | Std    |
|----------|-------------------------------------------------------------------------------------------|-----------------------|--------|
| AA799406 | EST188903                                                                                 | 547.9                 | 163.9  |
| AA799452 | transaldolase 1                                                                           | 134.1                 | 57.3   |
| AA799501 | NADH dehydrogenase (ubiquinone) 1 alpha subcomplex 5                                      | 120                   | 26.5   |
| AA799520 | DD6G4-2                                                                                   | 298.2                 | 54.6   |
| AA799645 | FXYD domain-containing ion transport regulator 1                                          | 85.7                  | 36.9   |
| AA799672 | ribosomal protein L6                                                                      | 354.5                 | 105.1  |
| AA799804 | Transcribed sequences                                                                     | 279.9                 | 48.5   |
| AA799899 | Transcribed sequence with strong similarity to protein pir:R5RT18 (R.norvegicus) R5RT     | 854.2                 | 146.6  |
| AA800054 | ribosomal protein L19                                                                     | 1154                  | 187    |
| AA800669 | protein phosphatase 2 (formerly 2A), regulatory subunit A (PR 65), alpha isoform          | 228.4                 | 95.6   |
| AA800814 | EST190311 Transcribed sequence with strong similarity to protein ref:NP_076006.1 (M.      | 199                   | 102.1  |
| AA800849 | EST190346                                                                                 | 261                   | 84.6   |
| AA800881 | EST190378                                                                                 | 202.2                 | 88.7   |
| AA801130 | growth factor receptor bound protein 2                                                    | 385.5                 | 78.5   |
| AA817887 | profilin                                                                                  | 696.5                 | 28.7   |
| AA817892 | guanine nucleotide binding protein, beta polypeptide 2                                    | 242                   | 34.9   |
| AA817997 | ribosomal protein L24                                                                     | 933.2                 | 142.2  |
| AA817997 | ribosomal protein L24                                                                     | 725.2                 | 113.1  |
| AA818025 | CD59 antigen                                                                              | 263.1                 | 66.8   |
| AA818025 | CD59 antigen                                                                              | 131.5                 | 48.4   |
| AA818069 | polyubiquitin                                                                             | 1938.4                | 152.2  |
| AA818152 | UI-R-A0-am-b-09-0-UI /clone                                                               | 565.4                 | 237.9  |
| AA818843 | postsynaptic protein Cript                                                                | 67.4                  | 21.5   |
| AA818858 | Peptidylprolyl isomerase A (cyclophilin A)                                                | 338.1                 | 128.4  |
| AA819338 | signal sequence receptor 4                                                                | 90.4                  | 19.4   |
| AA849038 | ribosomal protein L31                                                                     | 1000.3                | 68.5   |
| AA849648 | ribosomal protein L21                                                                     | 170.3                 | 37.5   |
| AA850885 | unknown Glu-Pro dipeptide repeat protein                                                  | 3336.7                | 538    |
| AA852004 | glutamine synthetase 1                                                                    | 142.4                 | 39.2   |
| AA858590 | Transcribed sequences                                                                     | 291.3                 | 107.2  |
| AA858607 | Transcribed sequence with strong similarity to protein ref:NP_035934.1 (M.musculus) c     | 294.8                 | 70     |
| AA859919 | UI-R-E0-cg-c-01-0-UI.s1 Rattus norvegicus                                                 | 330.4                 | 103.8  |
| AA860030 | tubulin, beta 5                                                                           | 384                   | 51.4   |
| AA866460 | coated vesicle membrane protein                                                           | 162.1                 | 31.7   |
| AA874999 | Transcribed sequence with strong similarity to protein ref:NP_006799.1 (H.sapiens) pro    | 147.7                 | 11.9   |
| AA875225 | GTP-binding protein (G-alpha-i2)                                                          | 1169.9                | 333.7  |
| AA875225 | GTP-binding protein (G-alpha-i2)                                                          | 301.9                 | 54.9   |
| AA875233 | prosaposin                                                                                | 7750.4                | 488.1  |
| AA875286 | Transcribed sequence with strong similarity to protein ref:NP_059128.1 (H.sapiens) pro    | 311.7                 | 89.5   |
| AA875523 | Transcribed sequence with strong similarity to protein sp:Q64119 (R.norvegicus) MLES      | 2738.7                | 620.7  |
| AA891171 | EST194974 Transcribed sequence with moderate similarity to protein ref:NP_004540.1        | 151.2                 | 29.8   |
| AA891651 | EST195454 Transcribed sequence with moderate similarity to protein pir:T00741 (H.sap      | 120.5                 | 53.4   |
| AA891729 | ribosomal protein S27a                                                                    | 2000.1                | 198.4  |
| AA892086 | Transcribed sequence with strong similarity to protein pir:KJHUGU (H.sapiens) KJHUGU      | 491.8                 | 104.4  |
| AA892123 | ribosomal protein L36                                                                     | 172.5                 | 67.3   |
| AA892248 | EST196051                                                                                 | 360.1                 | 134    |
| AA892248 | EST196051                                                                                 | 172.8                 | 31.3   |
| AA892332 | cystatin C                                                                                | 252.4                 | 69.8   |
| AA892333 | alpha-tubulin                                                                             | 1332.6                | 300.5  |
| AA892367 | Transcribed sequence with strong similarity to protein sp:P21531 (R.norvegicus) RL3_R     | 1264.2                | 222.5  |
| AA892373 | syntenin                                                                                  | 403.9                 | 141.8  |
| AA892414 | EST196217 Transcribed sequences                                                           | 137                   | 33.9   |
| AA892462 | Transcribed sequence with strong similarity to protein ref:NP_079926.1 (M.musculus) F     | 522.9                 | 84.7   |
| AA892557 | spermidine synthase                                                                       | 148.3                 | 39.2   |
| AA892582 | aldehyde dehydrogenase family 3, member A1                                                | 698.4                 | 131.3  |
| AA892649 | gamma-aminobutyric acid receptor associated protein                                       | 690.6                 | 106.7  |
| AA892775 | Lysozyme                                                                                  | 2217.9                | 455.1  |
| AA892776 | solute carrier family 25 (mitochondrial carrier; adenine nucleotide translocator), member | 302.5                 | 100.6  |
| AA892797 | phosphoglycerate kinase 1                                                                 | 250.5                 | 97.9   |
| AA892814 | calpain, small subunit 1                                                                  | 168.7                 | 41.7   |
| AA892832 | fatty acid elongase 1                                                                     | 106.1                 | 32.7   |
| AA892854 | EST196657 Transcribed sequences                                                           | 116.8                 | 31.9   |
| AA893007 | Transcribed sequences                                                                     | 94.3                  | 32.6   |
| AA893082 | Transcribed sequences                                                                     | 274.7                 | 37.9   |
| AA893217 | EST197020 Transcribed sequences                                                           | 145.1                 | 37.7   |
| AA893246 | EST197049 Transcribed sequence with strong similarity to protein sp:P57746 (M.muscu       | 160.3                 | 30.1   |
| AA893443 | RAP1B, member of RAS oncogene family                                                      | 466.6                 | 89.6   |
| AA893485 | EST197288                                                                                 | 5738.7                | 1210.1 |
| AA893870 | EST197673                                                                                 | 118                   | 37.5   |
| AA894004 | Transcribed sequence with weak similarity to protein ref:NP_077377.1 (R.norvegicus)       | 370.5                 | 73.4   |
| AA894029 | Transcribed sequences                                                                     | 166.8                 | 40.6   |
| AA894200 | Transcribed sequence with strong similarity to protein sp:Q64119 (R.norvegicus) MLES      | 2364                  | 242.4  |
| AA942751 | Tyrosine 3-monooxygenase/tryptophan 5-monooxygenase activation protein, theta poly        | 80.1                  | 26.6   |
| AA944007 | nucleobindin                                                                              | 319.4                 | 76.1   |
| AA944856 | RAP1B, member of RAS oncogene family                                                      | 310.3                 | 32.5   |
| AA945152 | EST200651                                                                                 | 2252.6                | 406.4  |
| AA945611 | ribosomal protein L10                                                                     | 743.3                 | 98.4   |

|          |                                                                                       |        |       |
|----------|---------------------------------------------------------------------------------------|--------|-------|
| AA945806 | ribosomal protein S14                                                                 | 470.3  | 95.3  |
| AA946040 | EST201539 Transcribed sequence with strong similarity to protein ref:NP_079904.1 (M.  | 116.5  | 20.6  |
| AA956114 | Transcribed sequence with strong similarity to protein ref:NP_112400.1 (R.norvegicus) | 83.7   | 12.3  |
| AA963674 | eukaryotic translation elongation factor 2                                            | 646    | 337   |
| AA964320 | Transcribed sequence with strong similarity to protein ref:NP_080337.1 (M.musculus) F | 171.4  | 59.2  |
| AA965264 | Ribosomal protein S29                                                                 | 4339   | 561.2 |
| AA998683 | heat shock 27kDa protein 1                                                            | 187.3  | 73.3  |
| AB013454 | Rat amino acid starvation-induced protein mRNA, 3' end                                | 85.7   | 17.5  |
| AB022209 | ribonucleoprotein F                                                                   | 73.9   | 25.3  |
| AF001898 | aldehyde dehydrogenase family 1, member A1                                            | 95.7   | 52.7  |
| AF009656 | hypoxanthine guanine phosphoribosyl transferase                                       | 220.6  | 81.6  |
| AF029357 | olfactory receptor-like protein gene                                                  | 157.4  | 75.8  |
| AF031642 | solute carrier family 14, member 2 kidney urea transporter (UT4)                      | 152.2  | 53.7  |
| AF048687 | UDP-Gal:betaGlcNAc beta 1,4-galactosyltransferase, polypeptide 6                      | 141.3  | 40.8  |
| AF065438 | peptidylprolyl isomerase C-associated protein                                         | 183.3  | 50.5  |
| AF067795 | C-terminal binding protein 1                                                          | 523    | 117.4 |
| AF083269 | actin related protein 2/3 complex, subunit 1B                                         | 409    | 64.7  |
| AF083269 | actin related protein 2/3 complex, subunit 1B                                         | 316.7  | 53.1  |
| AF087943 | CD14 antigen                                                                          | 430.3  | 84.2  |
| AF087944 | CD14 antigen                                                                          | 453.1  | 51.8  |
| AF089817 | regulator of G-protein signaling 19 interacting protein 1                             | 830.4  | 336.4 |
| AI007820 | heat shock protein 90 beta                                                            | 622.1  | 121.4 |
| AI007824 | EST202275                                                                             | 197.4  | 87.5  |
| AI008641 | ribosomal protein L22                                                                 | 329.5  | 153   |
| AI008852 | eukaryotic translation elongation factor 1 alpha 1                                    | 294.6  | 59.9  |
| AI008888 | cystatin B                                                                            | 795.6  | 97.3  |
| AI009132 | Transcribed sequence with strong similarity to protein ref:NP_079900.1 (M.musculus) F | 187.9  | 35    |
| AI009605 | Ras homolog enriched in brain                                                         | 91.2   | 21.1  |
| AI010083 | peroxiredoxin 1                                                                       | 467.6  | 91.6  |
| AI010292 | EST204743                                                                             | 420    | 190.3 |
| AI010632 | Transcribed sequence with strong similarity to protein sp:Q62931 (R.norvegicus) GS28  | 387.3  | 94.2  |
| AI012805 | ribosomal protein L13A                                                                | 550.3  | 92.4  |
| AI013627 | defender against cell death 1                                                         | 96.4   | 15.3  |
| AI013853 | ribosomal protein S23                                                                 | 585.7  | 77.6  |
| AI014087 | ribosomal protein S26                                                                 | 829    | 187.3 |
| AI014135 | EST207690                                                                             | 334    | 79.6  |
| AI070848 | actin, beta                                                                           | 2279.3 | 316.4 |
| AI071866 | Rattus norvegicus Nclone10 mRNA                                                       | 112.6  | 13.8  |
| AI102044 | Transcribed sequences                                                                 | 273.2  | 145   |
| AI102505 | cytochrome c oxidase, subunit VIlla                                                   | 1017.2 | 239.9 |
| AI103074 | ribosomal protein S12                                                                 | 1519.8 | 272.4 |
| AI103236 | ribosomal protein L35a                                                                | 219.9  | 54.3  |
| AI103396 | EST212685                                                                             | 2594.2 | 860.4 |
| AI103957 | CD 81 antigen                                                                         | 596.5  | 132.4 |
| AI104035 | Transcribed sequence with strong similarity to protein ref:NP_079904.1 (M.musculus) F | 380.5  | 174.2 |
| AI104520 | cytochrome c oxidase, subunit VIa, polypeptide 1                                      | 678    | 86.7  |
| AI104544 | ribosomal protein S17                                                                 | 302    | 42.2  |
| AI105050 | ATP synthase, H+ transporting, mitochondrial F1 complex, beta polypeptide             | 208.6  | 58.9  |
| AI112173 | ATPase Na+/K+ transporting beta 1 polypeptide                                         | 449.4  | 140.7 |
| AI169104 | Transcribed sequence with strong similarity to protein sp:P06765 (R.norvegicus) PLF4  | 1048   | 174.6 |
| AI169370 | alpha-tubulin                                                                         | 1457.1 | 187.4 |
| AI169802 | ferritin, heavy polypeptide 1                                                         | 2480.8 | 142.2 |
| AI170268 | Beta-2-microglobulin                                                                  | 760    | 106   |
| AI170776 | growth factor receptor bound protein 2                                                | 102.3  | 37    |
| AI171085 | Ribosomal protein L39                                                                 | 305.3  | 51.1  |
| AI171355 | EST217310                                                                             | 628    | 156.7 |
| AI171844 | ATP synthase, H+ transporting, mitochondrial F1 complex, epsilon subunit              | 210.4  | 38.1  |
| AI172162 | proteasome (prosome, macropain) subunit, beta type 4                                  | 483    | 112.9 |
| AI172411 | glutathione peroxidase 3                                                              | 194.3  | 34    |
| AI175486 | ribosomal protein S7                                                                  | 149.1  | 31.8  |
| AI176546 | heat shock protein 86                                                                 | 277.8  | 99.1  |
| AI176589 | ribosomal protein L27                                                                 | 825.4  | 53.4  |
| AI176589 | ribosomal protein L27                                                                 | 372.8  | 52.4  |
| AI176595 | Cathepsin L                                                                           | 962.5  | 186.1 |
| AI178207 | ribosomal protein S21                                                                 | 451.8  | 25.1  |
| AI178750 | eukaryotic translation elongation factor 2                                            | 606.9  | 37.5  |
| AI179012 | actin, beta                                                                           | 9899   | 876   |
| AI179150 | EST222834                                                                             | 2946.6 | 465   |
| AI179610 | Heme oxygenase                                                                        | 669.1  | 65.4  |
| AI180013 | Fc receptor, IgG, alpha chain transporter                                             | 542.2  | 130.8 |
| AI180424 | Tyrosine 3-monooxygenase/tryptophan 5-monooxygenase activation protein, zeta poly     | 342.1  | 45.6  |
| AI227887 | cell division cycle 42 homolog (S. cerevisiae)                                        | 350.2  | 73.9  |
| AI228674 | Peptidylprolyl isomerase A (cyclophilin A)                                            | 868.6  | 193.2 |
| AI229440 | diaphorase 1                                                                          | 243.7  | 115.5 |
| AI230406 | EST227101                                                                             | 211.4  | 65.9  |
| AI230748 | tumor protein, translationally-controlled 1                                           | 2096.2 | 313.3 |
| AI231292 | cystatin C                                                                            | 694.3  | 243   |
| AI231292 | cystatin C                                                                            | 352.8  | 60.8  |
| AI231807 | ferritin light chain 1                                                                | 2736   | 266   |

|          |                                                                                           |        |        |
|----------|-------------------------------------------------------------------------------------------|--------|--------|
| AI231807 | ferritin light chain 1                                                                    | 977.8  | 217.8  |
| AI232783 | glutamine synthetase 1                                                                    | 299    | 94.6   |
| AI233362 | Lysosomal associated membrane protein 1 (120 kDa)                                         | 799.1  | 107.7  |
| AI233749 | ribosomal protein L30                                                                     | 263.2  | 100.4  |
| AI234604 | heat shock protein 8                                                                      | 884.4  | 103.2  |
| AI235364 | ribosomal protein S15a                                                                    | 290.1  | 45.2   |
| AI235585 | cathepsin D                                                                               | 1163.5 | 157.3  |
| AI236795 | heat shock protein 90 beta                                                                | 356.1  | 44.8   |
| AI237731 | Lipoprotein lipase                                                                        | 394.5  | 160.1  |
| AI237836 | GNAS complex locus                                                                        | 1074.5 | 159.4  |
| AI237836 | GNAS complex locus                                                                        | 351.6  | 27.8   |
| AI639012 | Transcribed sequence with weak similarity to protein ref:NP_076947.1 (H.sapiens) hyp      | 111.1  | 20.4   |
| AI639076 | cDNA clone rx04025 3'                                                                     | 1034   | 313.9  |
| AI639107 | cDNA clone rx04084 3                                                                      | 333.9  | 84.8   |
| AI639255 | Transcribed sequences                                                                     | 212.7  | 35.5   |
| AJ004912 | integral membrane protein Tmp21-I (p23)                                                   | 668.2  | 111.9  |
| AJ009698 | embigin                                                                                   | 266.8  | 39.9   |
| AJ009698 | embigin                                                                                   | 256.7  | 50.8   |
| D10706   | ornithine decarboxylase antizyme 1                                                        | 451.8  | 42.2   |
| D10706   | ornithine decarboxylase antizyme 1                                                        | 359.5  | 53.8   |
| D10706   | ornithine decarboxylase antizyme 1                                                        | 241.4  | 60.8   |
| D10755   | proteasome (prosome, macropain) subunit, alpha type 6                                     | 105.4  | 34.2   |
| D10854   | aldo-keto reductase family 1, member A1                                                   | 393.1  | 109.7  |
| D10874   | ATPase, H+ transporting, lysosomal (vacuolar proton pump) 16 kDa                          | 1923.7 | 239.3  |
| D10874   | ATPase, H+ transporting, lysosomal (vacuolar proton pump) 16 kDa                          | 764    | 100.3  |
| D12771   | solute carrier family 25 (mitochondrial carrier; adenine nucleotide translocator), member | 410    | 138.4  |
| D13127   | ATP synthase, H+ transporting, mitochondrial F1 complex, O subunit (oligomycin sensit     | 143.1  | 60.7   |
| D13966   | insulin receptor-related receptor                                                         | 217.2  | 107.7  |
| D14688   | myosin regulatory light chain                                                             | 280.3  | 36.8   |
| D16102   | glycerol kinase                                                                           | 68.4   | 51.4   |
| D16309   | Cyclin D3                                                                                 | 70.6   | 17.7   |
| D16554   | polyubiquitin                                                                             | 1234.1 | 246    |
| D17445   | Tyrosine 3-monooxygenase/tryptophan 5-monooxygenase activation protein, eta polype        | 607.5  | 61.7   |
| D25224   | laminin receptor 1 (67kD, ribosomal protein SA)                                           | 606.8  | 75.1   |
| D38380   | Transferrin                                                                               | 147.6  | 44     |
| D42116   | complement receptor related protein                                                       | 237.2  | 60.1   |
| D45247   | proteasome subunit RCX                                                                    | 131    | 36.7   |
| D45249   | protease (prosome, macropain) 28 subunit, alpha                                           | 220.6  | 28.3   |
| D78308   | calreticulin                                                                              | 596.6  | 140.9  |
| D78613   | Protein tyrosine phosphatase, receptor type, epsilon polypeptide                          | 76.4   | 23.6   |
| D84450   | ATPase, Na+/K+ transporting, beta 3 polypeptide                                           | 202.3  | 78.1   |
| D87840   | Mucosal vascular addressin cell adhesion molecule 1                                       | 71     | 10.7   |
| D90404   | cathepsin C                                                                               | 196.6  | 39     |
| D90404   | cathepsin C                                                                               | 126.1  | 29.9   |
| E01524   | P450 (cytochrome) oxidoreductase                                                          | 54.4   | 17.2   |
| E01534   | DNA sequence expressed especially in rat insulinoma                                       | 356.1  | 81.3   |
| E02315   | calmodulin                                                                                | 242.6  | 55.4   |
| J00797   | alpha-tubulin                                                                             | 155.1  | 46.6   |
| J01435   | mitochondrial cytochrome oxidase subunits I,II, III genes, ATPase subunit 6 gene          | 7775.6 | 1714.9 |
| J01435   | mitochondrial cytochrome oxidase subunits I,II, III genes, ATPase subunit 6 gene          | 4243   | 428.5  |
| J01435   | mitochondrial cytochrome oxidase subunits I,II, III genes, ATPase subunit 6 gene,         | 265.7  | 213.4  |
| J01436   | mitochondrial cytochrome B                                                                | 1125.2 | 458    |
| J02780   | tropomyosin 4                                                                             | 283.3  | 43     |
| J02962   | lectin, galactose binding, soluble 3                                                      | 730.9  | 129.8  |
| J03969   | nucleophosmin 1                                                                           | 122    | 21.9   |
| K02816   | pR-ET2 encoded oncodevelopmental protein                                                  | 166.2  | 44.2   |
| K02816   | pR-ET2 encoded oncodevelopmental protein                                                  | 83.7   | 29.6   |
| K03250   | ribosomal protein S11                                                                     | 489.1  | 29.2   |
| L01624   | serum/glucocorticoid regulated kinase                                                     | 102    | 27.3   |
| L03201   | cathepsin S                                                                               | 1767.1 | 160.8  |
| L12383   | ADP-ribosylation factor 4                                                                 | 102.8  | 16.7   |
| L13039   | annexin II                                                                                | 278.4  | 44.8   |
| L19927   | ATP synthase, H+ transporting, mitochondrial F1 complex, gamma polypeptide 1              | 107.4  | 38.9   |
| L19998   | sulfotransferase family 1A, phenol-preferring, member 1                                   | 55.4   | 35.6   |
| L28801   | general transcription factor III C 1                                                      | 79.7   | 34.9   |
| L33869   | ceruloplasmin                                                                             | 100.8  | 61.2   |
| L38437   | NADH dehydrogenase (ubiquinone) Fe-S protein 6                                            | 92.5   | 31.4   |
| M10068   | P450 (cytochrome) oxidoreductase                                                          | 120.1  | 24.1   |
| M11071   | MHC RT1 class Ib gene                                                                     | 615.2  | 141.5  |
| M11942   | heat shock protein 8                                                                      | 397.4  | 58.3   |
| M12672   | GTP-binding protein (G-alpha-i2)                                                          | 170.5  | 28.7   |
| M12919   | aldolase A                                                                                | 998.3  | 111.6  |
| M12919   | aldolase A                                                                                | 607.1  | 131.7  |
| M13100   | long interspersed repetitive DNA sequence LINE3                                           | 2109   | 793    |
| M13100   | long interspersed repetitive DNA sequence LINE3 (L1Rn)                                    | 107.2  | 14.3   |
| M13100   | long interspersed repetitive DNA sequence LINE3 (L1Rn)                                    | 75.5   | 20.8   |
| M14050   | heat shock 70kD protein 5                                                                 | 125    | 22.3   |
| M14656   | osteopontin                                                                               | 337.4  | 138.9  |
| M15481   | insulin-like growth factor 1                                                              | 183.2  | 51.3   |

|        |                                                                                      |         |        |
|--------|--------------------------------------------------------------------------------------|---------|--------|
| M15768 | CD4 antigen                                                                          | 195.5   | 18.7   |
| M15882 | clathrin, light polypeptide (Lca)                                                    | 583.3   | 117.9  |
| M17419 | ribosomal protein L5                                                                 | 597.5   | 61     |
| M17701 | Glyceraldehyde-3-phosphate dehydrogenase                                             | 564.1   | 131.3  |
| M19936 | prosaposin                                                                           | 782.6   | 79.4   |
| M20156 | ribosomal protein L18                                                                | 441.2   | 77.9   |
| M23591 | Protein phosphatase 2 (formerly 2A), catalytic subunit, beta isoform                 | 101.2   | 28.3   |
| M24026 | RT1 class Ib gene                                                                    | 425.1   | 52.4   |
| M25758 | phosphatidylinositol transfer protein                                                | 141.6   | 12.4   |
| M27905 | ribosomal protein L21                                                                | 491.7   | 67.3   |
| M28255 | cytochrome c oxidase, subunit VIIIa                                                  | 697.6   | 64.9   |
| M29358 | ribosomal protein S6                                                                 | 531.6   | 87     |
| M29358 | ribosomal protein S6                                                                 | 337     | 94.1   |
| M29866 | Complement component 3                                                               | 275.4   | 34.8   |
| M31322 | sperm membrane protein (YWK-II)                                                      | 132.4   | 52.4   |
| M31788 | phosphoglycerate kinase 1                                                            | 217.5   | 40.5   |
| M32016 | Lysosomal-associated membrane protein 2                                              | 64.7    | 18.9   |
| M32062 | Fc receptor, IgG, low affinity III                                                   | 479.6   | 126    |
| M32062 | Fc receptor, IgG, low affinity III                                                   | 295.3   | 49.4   |
| M34043 | thymosin beta-4                                                                      | 13017.2 | 0      |
| M34331 | ribosomal protein L35                                                                | 334.3   | 34.1   |
| M34331 | ribosomal protein L35                                                                | 330     | 29.1   |
| M38135 | Cathepsin H                                                                          | 154.6   | 31.8   |
| M54926 | lactate dehydrogenase A                                                              | 424.1   | 40.7   |
| M58404 | thymosin, beta 10                                                                    | 240.1   | 62.6   |
| M81088 | eukaryotic translation elongation factor 1 alpha 1                                   | 518.7   | 81.6   |
| M83143 | Sialyltransferase 1 (beta-galactoside alpha-2,6-sialyltransferase)                   | 119.6   | 53.8   |
| M84716 | ribosomal protein S3a                                                                | 518.3   | 101.9  |
| M86564 | prothymosin alpha                                                                    | 196.5   | 10.8   |
| M89646 | ribosomal protein S24                                                                | 530.5   | 83.1   |
| M91597 | nucleoside diphosphate kinase                                                        | 261     | 116.5  |
| M91652 | glutamine synthetase 1                                                               | 638.1   | 150.6  |
| M91652 | glutamine synthetase 1                                                               | 207.7   | 67.2   |
| M93257 | catechol-O-methyltransferase (COMT)                                                  | 296.6   | 98     |
| M98820 | Interleukin 1 beta                                                                   | 746.8   | 131.3  |
| M98820 | Interleukin 1 beta                                                                   | 163.6   | 71.6   |
| S45392 | heat shock protein 90                                                                | 190.3   | 63.5   |
| S45663 | synaptic glycoprotein SC2                                                            | 99.1    | 20.2   |
| S46798 | ND5, ND6 [rats, adult and senescent cerebral hemispheres, Mitochondrial, 954 nt]     | 368.4   | 124.3  |
| S55223 | tyrosine 3-monooxygenase/tryptophan 5 monooxygenase activation protein, beta polypep | 296.8   | 68.4   |
| S59893 | La=autoantigen SS-B/La                                                               | 93.3    | 44.1   |
| S61973 | NMDA receptor glutamate-binding chain                                                | 251     | 81.2   |
| S61973 | NMDA receptor glutamate-binding chain                                                | 90.7    | 36.9   |
| S63233 | phosphoglycerate mutase type B subunit                                               | 289.5   | 131.1  |
| S71021 | ribosomal protein L6                                                                 | 334.9   | 53.9   |
| S72594 | tissue inhibitor of metalloproteinase 2                                              | 450.6   | 66.1   |
| S76779 | apolipoprotein E                                                                     | 4595.2  | 336    |
| S77858 | non-muscle myosin alkali light chain                                                 | 798.5   | 95.8   |
| S79304 | cytochrome oxidase subunit I,                                                        | 3738.1  | 246.9  |
| S81353 | prosaposin                                                                           | 1751.9  | 115.6  |
| S81497 | lipase A, lysosomal acid                                                             | 865.5   | 156.5  |
| S82383 | slow-twitch alpha TM/hTMnm homolog                                                   | 718.4   | 101.2  |
| S83025 | TSH receptor suppressor element-binding protein-1=Y-box protein                      | 403.7   | 117.4  |
| S87522 | leukotriene A4 hydrolase                                                             | 225.4   | 47.6   |
| U03390 | guanine nucleotide binding protein, beta polypeptide 2-like 1                        | 285.1   | 54.6   |
| U10894 | allograft inflammatory factor 1                                                      | 254.9   | 99.3   |
| U11071 | polyadenylate-binding protein-related protein                                        | 811.7   | 237.3  |
| U15138 | LIC-2 dynein light intermediate chain 53/55                                          | 117.6   | 12.5   |
| U17919 | allograft inflammatory factor 1                                                      | 251.9   | 75.2   |
| U18729 | cytochrome b558 alpha-subunit                                                        | 781.3   | 232.2  |
| U20643 | aldolase A                                                                           | 503.9   | 65.4   |
| U31598 | MHC class II-like alpha chain RT1.Ma                                                 | 220.6   | 53.1   |
| U47315 | brain protein 44-like                                                                | 142     | 42.5   |
| U49099 | Transcribed sequence with strong similarity to protein sp:Q62931 (R.norvegicus) GS28 | 136.7   | 39.9   |
| U53184 | LPS-induced TNF-alpha factor                                                         | 232.8   | 32.2   |
| U59184 | bcl2-associated X protein                                                            | 497.5   | 56.1   |
| U77829 | growth arrest specific 5                                                             | 158.2   | 31.7   |
| U77931 | unknown mRNA                                                                         | 580.3   | 107.8  |
| U95052 | eukaryotic translation initiation factor 4 gamma, 2                                  | 218.1   | 65.3   |
| U95178 | disabled homolog 2, mitogen-responsive phosphoprotein (Drosophila)                   | 355.4   | 35     |
| V01217 | actin, beta                                                                          | 5960.6  | 1537.5 |
| X02610 | enolase 1, alpha                                                                     | 435.6   | 68.2   |
| X02918 | Protein disulfide isomerase (Prolyl 4-hydroxylase, beta polypeptide)                 | 273.3   | 57     |
| X04979 | apolipoprotein E                                                                     | 10319.7 | 557.4  |
| X05472 | RNREP24R Rat 2.4 kb repeat DNA right terminal region                                 | 359.1   | 152.2  |
| X06423 | ribosomal protein S8                                                                 | 583.5   | 76.9   |
| X06423 | ribosomal protein S8                                                                 | 425.7   | 40.1   |
| X06483 | ribosomal protein L32                                                                | 1040.4  | 229    |
| X14181 | ribosomal protein L18a                                                               | 1349.3  | 110.4  |

|        |                                                                                      |        |       |
|--------|--------------------------------------------------------------------------------------|--------|-------|
| X14181 | ribosomal protein L18a                                                               | 698.2  | 68.1  |
| X14210 | ribosomal protein S4                                                                 | 1713.7 | 304.5 |
| X14210 | ribosomal protein S4                                                                 | 330.6  | 168   |
| X14671 | ribosomal protein L26                                                                | 431.6  | 99.1  |
| X14848 | MIRNXX Rattus norvegicus mitochondrial genome                                        | 1297.7 | 268.5 |
| X15013 | ribosomal protein L7a                                                                | 417.3  | 58.3  |
| X15030 | cytochrome c oxidase, subunit Va                                                     | 432.8  | 94    |
| X15096 | acidic ribosomal protein P0                                                          | 1116.3 | 141   |
| X15216 | ribosomal protein L21                                                                | 83.9   | 18.5  |
| X16145 | Fucosidase, alpha-L-1, tissue                                                        | 187.8  | 24.5  |
| X17053 | small inducible cytokine A2                                                          | 256.8  | 98.3  |
| X17053 | small inducible cytokine A2                                                          | 120.2  | 36    |
| X17665 | ribosomal protein S16                                                                | 1279.9 | 225.9 |
| X51536 | ribosomal protein S3                                                                 | 873.4  | 79.7  |
| X51536 | ribosomal protein S3                                                                 | 243.1  | 44.7  |
| X51706 | ribosomal protein L9                                                                 | 540.7  | 109.6 |
| X51706 | ribosomal protein L9                                                                 | 342.7  | 70.2  |
| X51707 | ribosomal protein S19                                                                | 648.3  | 192.8 |
| X52619 | ribosomal protein L28                                                                | 681.8  | 30.5  |
| X52733 | ribosomal protein L27a                                                               | 1529.5 | 188.9 |
| X52815 | cytoplasmic-gamma isoform of actin                                                   | 2436.8 | 470.3 |
| X53377 | ribosomal protein S7                                                                 | 310.9  | 64.3  |
| X53378 | ribosomal protein S13                                                                | 306.9  | 97.6  |
| X53504 | ribosomal protein L12                                                                | 297.2  | 33.6  |
| X54081 | cytochrome c oxidase subunit IV                                                      | 338.5  | 103.8 |
| X54467 | cathepsin D                                                                          | 2184.5 | 352.2 |
| X54617 | myosin regulatory light chain                                                        | 197.3  | 43.9  |
| X55153 | ribosomal protein P2                                                                 | 1240.8 | 180.7 |
| X57432 | ribosomal protein S2                                                                 | 1777.9 | 167.5 |
| X57529 | ribosomal protein S18                                                                | 1433.5 | 267.3 |
| X58200 | ribosomal protein L23                                                                | 1653.8 | 478.2 |
| X58200 | ribosomal protein L23                                                                | 662.4  | 63.7  |
| X58389 | Rat amino acid starvation-induced protein mRNA, 3' end                               | 318.7  | 72.2  |
| X58465 | ribosomal protein S5                                                                 | 477.1  | 109.6 |
| X58465 | ribosomal protein S5                                                                 | 302.9  | 73.9  |
| X59051 | Ribosomal protein S29                                                                | 2830.5 | 423.9 |
| X59375 | ribosomal protein S27                                                                | 295.8  | 63.3  |
| X60212 | Rat amino acid starvation-induced protein mRNA, 3' end                               | 1505.3 | 212.7 |
| X61295 | L1 retroposon, ORF2                                                                  | 74     | 17.5  |
| X61654 | CD63 antigen                                                                         | 1878.9 | 134.1 |
| X62145 | ribosomal protein L8                                                                 | 459.2  | 144.2 |
| X62146 | ribosomal protein L11                                                                | 493.1  | 42.5  |
| X62146 | ribosomal protein L11                                                                | 463.3  | 43.1  |
| X62166 | ribosomal protein L3                                                                 | 363.6  | 84.7  |
| X62322 | granulin                                                                             | 2421   | 421.4 |
| X62322 | granulin                                                                             | 771    | 96    |
| X62482 | ribosomal protein S25                                                                | 177.1  | 51.3  |
| X62671 | hybrid protein (ubiquitin-like protein/rps30)                                        | 607.8  | 118.7 |
| X62952 | vimentin                                                                             | 241.4  | 27    |
| X63434 | Urinary plasminogen activator, urokinase                                             | 165    | 37    |
| X66369 | ribosomal protein L37                                                                | 378.5  | 123.1 |
| X66370 | ribosomal protein S9                                                                 | 549.3  | 94.9  |
| X70871 | Cyclin G1                                                                            | 436.3  | 154.6 |
| X71127 | complement component 1, q subcomponent, beta polypeptide                             | 507.6  | 83.2  |
| X78167 | ribosomal protein L15                                                                | 280.1  | 85.9  |
| X82396 | cathepsin B                                                                          | 1595   | 132.7 |
| X84047 | XLas protein                                                                         | 205    | 28    |
| X93352 | ribosomal protein L10a                                                               | 219.2  | 63.1  |
| X94242 | ribosomal protein L14                                                                | 94.5   | 28.2  |
| X95850 | R.norvegicus mRNA for novel gene expressed in circadian manner, clone SCN8           | 174.1  | 59.4  |
| X96437 | PRG1 gene                                                                            | 71.7   | 19.9  |
| Y00404 | superoxide dismutase 1                                                               | 734    | 270.4 |
| Y00497 | superoxide dismutase 2                                                               | 202.1  | 271.5 |
| Y12635 | ATPase, H+ transporting, lysosomal (vacuolar proton pump), beta 56/58 kDa, isoform 2 | 160.5  | 53.2  |
