# Supplementary material
Source: publisher figshare collection journal article supplement (https://karger.figshare.com/articles/dataset/_/5104426)
Supplement: Supplementary file 2 [file 1]

# Genes expressed in some microglia cultures

| GB code  | Title                                                                                   | No. Present Calls | Mean Expression Value | Std  |
|----------|-----------------------------------------------------------------------------------------|-------------------|-----------------------|------|
| AA685178 | EST106484                                                                               | 2                 | 152.9                 | 14.6 |
| AA685903 | Transcribed sequence with weak similarity to protein sp:P34058 (R.norvegicus) HS9B      | 4                 | 80.3                  | 15   |
| AA686164 | EST109401                                                                               | 2                 | 22.6                  | 13.5 |
| AA799279 | Transcribed sequence with strong similarity to protein ref:NP_062732.1 (M.musculus)     | 4                 | 121.7                 | 38.2 |
| AA799279 | Transcribed sequence with strong similarity to protein ref:NP_062732.1 (M.musculus)     | 4                 | 44.3                  | 18.1 |
| AA799369 | Transcribed sequence with weak similarity to protein pir:S21497 (R.norvegicus) S2149    | 1                 | 34.4                  | 15.7 |
| AA799389 | EST188886                                                                               | 2                 | 97.6                  | 44.7 |
| AA799438 | Transcribed sequence with weak similarity to protein ref:NP_543132.1 (M.musculus)       | 1                 | 99.6                  | 24.8 |
| AA799440 | Transcribed sequence with moderate similarity to protein ref:NP_054797.2 (H.sapiens)    | 4                 | 42.4                  | 11.8 |
| AA799457 | Transcribed sequence with weak similarity to protein ref:NP_501393.1 (C.elegans) K0     | 1                 | 31.1                  | 12.4 |
| AA799461 | pincher                                                                                 | 1                 | 71.7                  | 17   |
| AA799472 | Transcribed sequence with moderate similarity to protein sp:Q9Y3C0 (H.sapiens) AD1      | 1                 | 45                    | 5.8  |
| AA799481 | Transcribed sequence with strong similarity to protein ref:NP_068676.1 (M.musculus)     | 1                 | 15.3                  | 12.1 |
| AA799499 | Transcribed sequence with moderate similarity to protein ref:NP_079873.1 (M.musculu     | 4                 | 114.9                 | 46.1 |
| AA799511 | Transcribed sequence with weak similarity to protein pir:DDRT (R.norvegicus) DDRT       | 4                 | 54.9                  | 16.4 |
| AA799523 | Transcribed sequence with weak similarity to protein pir:DDRT (R.norvegicus) DDRT       | 4                 | 70.7                  | 11.2 |
| AA799525 | EST189022                                                                               | 2                 | 74.9                  | 21.4 |
| AA799526 | EST189023                                                                               | 2                 | 39.3                  | 16.6 |
| AA799529 | Transcribed sequences                                                                   | 1                 | 21.9                  | 12.1 |
| AA799538 | EST189035                                                                               | 2                 | 37.3                  | 9.2  |
| AA799538 | Transcribed sequence with weak similarity to protein ref:NP_112409.1 (R.norvegicus)     | 1                 | 22.8                  | 11.2 |
| AA799542 | ras-related C3 botulinum toxin substrate 1 (rho family, small GTP binding protein Rac1  | 4                 | 79.9                  | 22   |
| AA799545 | Transcribed sequence with weak similarity to protein pir:JQ0866 (R.norvegicus) JQ08     | 1                 | 46.5                  | 16.8 |
| AA799550 | T-cell activation protein                                                               | 4                 | 98.4                  | 44   |
| AA799551 | Transcribed sequence with weak similarity to protein prf:1515250A (R.norvegicus) 15     | 1                 | 106.6                 | 55   |
| AA799569 | Transcribed sequences                                                                   | 1                 | 41.2                  | 9.1  |
| AA799570 | Transcribed sequence with moderate similarity to protein ref:NP_075223.1 (R.norvegi     | 1                 | 14.6                  | 11.8 |
| AA799571 | Transcribed sequence with strong similarity to protein sp:Q9QY73 (M.musculus) C108      | 1                 | 49.3                  | 30.3 |
| AA799582 | heterogeneous nuclear ribonucleoprotein K                                               | 3                 | 90.9                  | 55.7 |
| AA799598 | EST189095                                                                               | 2                 | 44.4                  | 13.2 |
| AA799599 | EST189096                                                                               | 2                 | 81.9                  | 26.3 |
| AA799607 | EST189104                                                                               | 2                 | 50.2                  | 13.6 |
| AA799609 | EST189106                                                                               | 2                 | 56.7                  | 12.2 |
| AA799614 | Transcribed sequence with moderate similarity to protein ref:NP_446189.1 (R.norvegi     | 1                 | 141.4                 | 18.2 |
| AA799616 | Transcribed sequence with moderate similarity to protein sp:P53801 (H.sapiens) PTTG     | 4                 | 341.5                 | 74.2 |
| AA799641 | Transcribed sequence with strong similarity to protein ref:NP_036162.1 (M.musculus)     | 1                 | 91.1                  | 12.1 |
| AA799654 | EST189151                                                                               | 2                 | 67.5                  | 11.8 |
| AA799657 | EST189154                                                                               | 2                 | 52.4                  | 17.6 |
| AA799664 | v-akt murine thymoma viral oncogene homolog 1                                           | 3                 | 98.5                  | 14.2 |
| AA799667 | cleavage and polyadenylation specific factor 4, 30kD subunit                            | 4                 | 102.8                 | 13.4 |
| AA799700 | Transcribed sequence with strong similarity to protein sp:P97364 (M.musculus) SPS2_     | 4                 | 156                   | 71.7 |
| AA799711 | Transcribed sequence with moderate similarity to protein pir:S12207 (M.musculus) S12    | 1                 | 21.4                  | 12.1 |
| AA799724 | Transcribed sequence with strong similarity to protein sp:P97304 (M.musculus) RPA9      | 1                 | 60                    | 12.5 |
| AA799729 | Phosphodiesterase 4B, cAMP-specific (dunce (Drosophila)-homolog phosphodiesteras        | 4                 | 60.7                  | 8.6  |
| AA799751 | Transcribed sequence with weak similarity to protein ref:NP_476544.1 (R.norvegicus)     | 1                 | 22.4                  | 11.9 |
| AA799755 | Transcribed sequence with weak similarity to protein ref:NP_113954.1 (R.norvegicus)     | 1                 | 15.3                  | 12.2 |
| AA799778 | EST189275                                                                               | 2                 | 50.5                  | 11.3 |
| AA799784 | EST189281                                                                               | 2                 | 39.1                  | 15.6 |
| AA799819 | EST189316                                                                               | 2                 | 68.1                  | 21.7 |
| AA799822 | Transcribed sequences                                                                   | 1                 | 93.3                  | 17.4 |
| AA799824 | Transcribed sequence with strong similarity to protein sp:Q9Z1G3 (M.musculus) VATC      | 1                 | 43.6                  | 21.9 |
| AA799858 | Transcribed sequence with moderate similarity to protein pir:S15892 (R.norvegicus) S1   | 1                 | 77.8                  | 25.5 |
| AA799861 | Transcribed sequence with strong similarity to protein sp:P70434 (M.musculus) IRF7_     | 1                 | 36.3                  | 14.8 |
| AA799887 | proteasome (prosome, macropain) 26S subunit, non-ATPase,4                               | 1                 | 32.2                  | 19.3 |
| AA799890 | Transcribed sequence with moderate similarity to protein pir:I60307 (E. coli) I60307 be | 3                 | 94.2                  | 15.1 |
| AA799980 | Protein phosphatase type 1B (formely 2C), Mg-dependent, beta isoform                    | 1                 | 45                    | 9.4  |
| AA799981 | Transcribed sequences                                                                   | 1                 | 65.3                  | 9.1  |
| AA799991 | Transcribed sequences                                                                   | 1                 | 26.2                  | 13.4 |
| AA799995 | ribosomal protein L14                                                                   | 1                 | 58.6                  | 27.4 |
| AA799996 | Transcribed sequence with weak similarity to protein ref:NP_077353.1 (R.norvegicus)     | 4                 | 62.7                  | 19.5 |
| AA800005 | CD151 antigen                                                                           | 1                 | 64.4                  | 17.8 |
| AA800015 | EST189512                                                                               | 2                 | 69.2                  | 40.9 |
| AA800034 | Transcribed sequence with moderate similarity to protein pdb:1LBG (E. coli) B Chain B   | 1                 | 71.1                  | 38.1 |
| AA800062 | N-acylsphingosine amidohydrolase (acid ceramidase)                                      | 1                 | 49.7                  | 31.4 |
| AA800170 | Transcribed sequence with weak similarity to protein sp:P57790 (R.norvegicus) KEAP      | 1                 | 28.9                  | 9.9  |
| AA800190 | Brain glycogen phosphorylase                                                            | 1                 | 143.7                 | 29.4 |
| AA800191 | Transcribed sequence with weak similarity to protein ref:NP_113865.1 (R.norvegicus)     | 4                 | 166.2                 | 26.4 |
| AA800199 | Transcribed sequence with weak similarity to protein pir:B39066 (R.norvegicus) B390     | 4                 | 91.4                  | 36.8 |
| AA800210 | Transcribed sequences                                                                   | 1                 | 27.7                  | 13.7 |
| AA800212 | EST189709                                                                               | 2                 | 39.5                  | 17.2 |
| AA800220 | Lysophospholipase 1                                                                     | 3                 | 42.1                  | 22.8 |
| AA800222 | Transcribed sequence with strong similarity to protein ref:NP_035917.1 (M.musculus)     | 1                 | 62.9                  | 41.5 |
| AA800250 | EST189747                                                                               | 2                 | 54.5                  | 28.4 |
| AA800268 | Transcribed sequence with moderate similarity to protein ref:NP_079937.1 (M.musculu     | 3                 | 95.5                  | 24.1 |
| AA800296 | Transcribed sequence with strong similarity to protein sp:P51003 (H.sapiens) PAP_HU     | 1                 | 7.9                   | 7    |

|          |                                                                                       |   |       |       |
|----------|---------------------------------------------------------------------------------------|---|-------|-------|
| AA800318 | EST189815                                                                             | 2 | 46.9  | 14.5  |
| AA800566 | EST190063                                                                             | 2 | 269.4 | 68.9  |
| AA800576 | Transcribed sequences                                                                 | 4 | 161.7 | 35.5  |
| AA800622 | EST190119                                                                             | 2 | 46.5  | 12.1  |
| AA800665 | Transcribed sequences                                                                 | 1 | 165.7 | 40.2  |
| AA800712 | Transcribed sequence with strong similarity to protein ref:NP_034570.1 (M.musculus)   | 1 | 20.8  | 16.3  |
| AA800743 | drebrin-like                                                                          | 3 | 88.2  | 44    |
| AA800749 | Transcribed sequences                                                                 | 1 | 33.1  | 29.5  |
| AA800787 | Transferrin                                                                           | 3 | 90.7  | 23.3  |
| AA800808 | Transcribed sequence with weak similarity to protein pir:S12207 (M.musculus) S12207   | 1 | 42.9  | 17.3  |
| AA800908 | Transcribed sequences                                                                 | 1 | 24.4  | 14.8  |
| AA801286 | Inositol (myo)-1(or 4)-monophosphatase 1                                              | 4 | 92.1  | 26.2  |
| AA801441 | EST190938                                                                             | 2 | 91.3  | 34.3  |
| AA817685 | cytochrome b5                                                                         | 1 | 48.4  | 77.9  |
| AA818072 | bcl-2 associated death agonist                                                        | 1 | 91.6  | 35    |
| AA818226 | cytochrome c oxidase, subunit 4a                                                      | 3 | 567.2 | 182.4 |
| AA818487 | cyclophilin B                                                                         | 4 | 183.5 | 37.7  |
| AA818554 | tropomyosin isoform 6                                                                 | 1 | 51.5  | 9.4   |
| AA818726 | UI-R-A0-ay-f-04-0-UI.s1 Rattus norvegicus cDNA                                        | 2 | 36    | 17.8  |
| AA818888 | ubiquitin A-52 residue ribosomal protein fusion product 1                             | 3 | 822.5 | 113.2 |
| AA818951 | pyruvate kinase, muscle                                                               | 4 | 644.6 | 81.3  |
| AA819338 | UI-R-A0-bc-c-12-0-UI.s1 Rattus norvegicus cDNA                                        | 2 | 55.9  | 28.1  |
| AA819547 | Transcribed sequence with strong similarity to protein ref:NP_080263.1 (M.musculus)   | 4 | 46.3  | 22.9  |
| AA819708 | cytochrome c oxidase, subunit 7a 3                                                    | 4 | 177   | 55.9  |
| AA848218 | DNA topoisomerase I                                                                   | 3 | 48.3  | 19.5  |
| AA848545 | Transcribed sequence with strong similarity to protein ref:NP_062719.1 (M.musculus)   | 4 | 44.7  | 25.8  |
| AA848546 | Transcribed sequence with strong similarity to protein ref:NP_062719.1 (M.musculus)   | 3 | 79    | 27.1  |
| AA849648 | ribosomal protein L21                                                                 | 4 | 128.3 | 36.2  |
| AA850219 | Annexin III (Lipocortin III)                                                          | 3 | 56.5  | 29.5  |
| AA850669 | cyclin-dependent kinase 5, regulatory subunit 1 (p35)                                 | 3 | 59.2  | 14    |
| AA850756 | Lysosomal associated membrane protein 1 (120 kDa)                                     | 4 | 160.9 | 33.7  |
| AA850781 | Transcribed sequence with strong similarity to protein ref:NP_080628.1 (M.musculus)   | 1 | 25.9  | 20.4  |
| AA850940 | ribosomal protein L4                                                                  | 4 | 92.2  | 47    |
| AA851381 | Ras homolog enriched in brain                                                         | 3 | 57    | 21.5  |
| AA851403 | Transcribed sequence with strong similarity to protein ref:NP_080337.1 (M.musculus)   | 1 | 106.2 | 61.3  |
| AA851403 | Transcribed sequence with strong similarity to protein ref:NP_080337.1 (M.musculus)   | 1 | 105.1 | 34    |
| AA852046 | Rat VL30 element mRNA                                                                 | 4 | 98.1  | 42.9  |
| AA858578 | Transcribed sequence with weak similarity to protein sp:P10266 (H.sapiens) POL1_H     | 1 | 32.7  | 16    |
| AA858588 | Transcribed sequences                                                                 | 3 | 77.9  | 22.2  |
| AA858636 | Transcribed sequence with strong similarity to protein ref:NP_032594.1 (M.musculus)   | 1 | 70.7  | 16.1  |
| AA858879 | Transcribed sequence with strong similarity to protein ref:NP_036005.1 (M.musculus)   | 1 | 33.4  | 17.2  |
| AA859305 | tropomyosin isoform 6                                                                 | 3 | 102.6 | 15.3  |
| AA859372 | ---                                                                                   | 3 | 78    | 38.7  |
| AA859529 | diacylglycerol O-acyltransferase 1                                                    | 1 | 32.4  | 21.2  |
| AA859536 | Transcribed sequence with strong similarity to protein sp:P07153 (R.norvegicus) RIB1  | 4 | 287.8 | 44.8  |
| AA859545 | Transcribed sequence with strong similarity to protein ref:NP_060745.1 (H.sapiens) hy | 3 | 103.3 | 23.4  |
| AA859612 | ---                                                                                   | 3 | 69.5  | 14.1  |
| AA859616 | Transcribed sequence with weak similarity to protein ref:NP_502422.1 (C.elegans) FY   | 3 | 37.5  | 19.4  |
| AA859619 | Transcribed sequence with weak similarity to protein ref:NP_476460.1 (R.norvegicus)   | 1 | 30.7  | 13.1  |
| AA859626 | Transcribed sequence with moderate similarity to protein ref:NP_219483.1 (H.sapiens)  | 1 | 22.4  | 12.8  |
| AA859645 | attractin                                                                             | 3 | 36.7  | 13.5  |
| AA859680 | Transcribed sequence with weak similarity to protein ref:NP_113835.1 (R.norvegicus)   | 4 | 484.9 | 76.9  |
| AA859680 | UI-R-E0-bs-d-12-0-UI.s1 Rattus norvegicus cDNA                                        | 2 | 67.4  | 18.5  |
| AA859688 | Transcribed sequence with weak similarity to protein pdb:1DUB (R.norvegicus) F Cha    | 1 | 52.9  | 29.7  |
| AA859702 | afadin                                                                                | 4 | 48.9  | 18.2  |
| AA859705 | Transcribed sequence with weak similarity to protein ref:NP_071863.1 (M.musculus)     | 3 | 52.5  | 17.5  |
| AA859718 | Transcribed sequence with moderate similarity to protein pir:S14234 (M.musculus) S14  | 1 | 22.5  | 10.9  |
| AA859750 | Transcribed sequences                                                                 | 1 | 38.8  | 13.2  |
| AA859757 | collagen, type V, alpha 1                                                             | 1 | 92.5  | 32.9  |
| AA859783 | large subunit ribosomal protein L36a                                                  | 3 | 99.2  | 23.5  |
| AA859796 | Transcribed sequence with weak similarity to protein ref:NP_076313.1 (M.musculus)     | 3 | 60.1  | 18.2  |
| AA859804 | GM2 ganglioside activator protein                                                     | 1 | 86.6  | 49.6  |
| AA859806 | cysteine string protein                                                               | 4 | 85.6  | 18.2  |
| AA859829 | Transcribed sequence with strong similarity to protein ref:NP_067475.1 (M.musculus)   | 1 | 20    | 11    |
| AA859837 | UI-R-E0-cc-g-09-0-UI.s1 Rattus norvegicus cDNA                                        | 2 | 136.2 | 17.8  |
| AA859837 | guanine deaminase                                                                     | 1 | 35    | 11.3  |
| AA859848 | Transcribed sequence with strong similarity to protein ref:NP_062310.1 (M.musculus)   | 1 | 24.6  | 20.3  |
| AA859869 | 26S proteasome, subunit p112                                                          | 3 | 89.2  | 31.9  |
| AA859877 | Transcribed sequences                                                                 | 1 | 59.2  | 25.5  |
| AA859896 | UI-R-E0-cc-d-12-0-UI.s1                                                               | 2 | 29    | 14.4  |
| AA859897 | Transcribed sequences                                                                 | 3 | 37.8  | 10.8  |
| AA859919 | Transcribed sequences                                                                 | 1 | 22.3  | 18.4  |
| AA859938 | BCL2/adenovirus E1B 19 kDa-interacting protein 3-like                                 | 3 | 66.3  | 12.9  |
| AA859942 | N-myristoyltransferase 1                                                              | 1 | 50    | 21.4  |
| AA859954 | vacuole Membrane Protein 1                                                            | 3 | 47.8  | 14.5  |
| AA859957 | Transcribed sequence with moderate similarity to protein ref:NP_004538.2 (H.sapiens)  | 4 | 106.6 | 58.8  |
| AA859971 | UI-R-E0-ca-g-10-0-UI.s1 Rattus norvegicus cDNA                                        | 2 | 71.2  | 26.3  |
| AA860024 | Transcribed sequence with strong similarity to protein sp:Q9D8N0 (M.musculus) EF1G    | 4 | 166.8 | 44.8  |
| AA866234 | Transcribed sequence with weak similarity to protein pir:A40389 (R.norvegicus) A4038  | 1 | 40.2  | 16.3  |

|          |                                                                                       |   |       |       |
|----------|---------------------------------------------------------------------------------------|---|-------|-------|
| AA866240 | ---                                                                                   | 3 | 64    | 33.8  |
| AA866240 | UI-R-A0-bg-g-05-0-UI.s1 Rattus norvegicus cDNA                                        | 2 | 81    | 38.8  |
| AA866248 | UI-R-A0-bg-h-03-0-UI.s1 Rattus norvegicus cDNA                                        | 2 | 276.6 | 77.3  |
| AA866257 | cytosolic leucine-rich protein                                                        | 3 | 128.5 | 32.1  |
| AA866276 | Transcribed sequence with weak similarity to protein ref:NP_112360.1 (R.norvegicus)   | 3 | 197   | 56.8  |
| AA866362 | Transcribed sequences                                                                 | 1 | 189.2 | 72.8  |
| AA866364 | Transcribed sequences                                                                 | 1 | 56.1  | 23.2  |
| AA866439 | UI-R-E0-ch-g-02-0-UI.s1 Rattus norvegicus cDNA                                        | 2 | 137.9 | 62    |
| AA866443 | UI-R-E0-ch-g-06-0-UI.s1 Rattus norvegicus cDNA                                        | 2 | 26.6  | 6.5   |
| AA866454 | UI-R-E0-br-e-07-0-UI.s1 Rattus norvegicus cDNA                                        | 2 | 137.4 | 42    |
| AA866459 | Transcribed sequence with strong similarity to protein ref:NP_077291.1 (H.sapiens) hy | 1 | 16.9  | 15.2  |
| AA866465 | UI-R-E0-br-f-08-0-UI.s1 Rattus norvegicus cDNA                                        | 2 | 24.6  | 15.3  |
| AA866472 | nucleosome assembly protein 1-like 1                                                  | 1 | 23.7  | 15.1  |
| AA866477 | Transcribed sequence with moderate similarity to protein ref:NP_079655.1 (M.musculu   | 4 | 59.1  | 14.6  |
| AA866485 | Transcribed sequences                                                                 | 1 | 32.1  | 15.1  |
| AA874784 | UI-R-E0-bw-e-07-0-UI.s1 Rattus norvegicus cDNA,                                       | 2 | 74.5  | 32.3  |
| AA874827 | Transcribed sequence with weak similarity to protein sp:Q15398 (H.sapiens) Y008_HU    | 1 | 65.4  | 41.2  |
| AA874874 | Transcribed sequence with strong similarity to protein sp:P12711 (R.norvegicus) ADH)  | 1 | 59.8  | 21.4  |
| AA874924 | Transcribed sequence with moderate similarity to protein ref:NP_034875.1 (M.musculu   | 4 | 76.6  | 26.7  |
| AA874926 | Rattus norvegicus focal adhesion kinase (FAK) mRNA, alternative 5'UTR                 | 1 | 25.4  | 18.1  |
| AA874928 | Transcribed sequence with strong similarity to protein ref:NP_542124.1 (M.musculus)   | 1 | 30.1  | 16.6  |
| AA874941 | UI-R-E0-ci-d-06-0-UI.s1 Rattus norvegicus cDNA                                        | 2 | 26.1  | 13.4  |
| AA874952 | UI-R-E0-ci-g-03-0-UI.s1 Rattus norvegicus cDNA                                        | 2 | 41.7  | 13.4  |
| AA874990 | Transcribed sequence with weak similarity to protein ref:NP_075912.1 (M.musculus)     | 1 | 34.4  | 13    |
| AA875004 | Transcribed sequence with strong similarity to protein ref:NP_116114.1 (H.sapiens) hy | 1 | 24.7  | 14.6  |
| AA875032 | Transcribed sequences                                                                 | 1 | 20.5  | 11.4  |
| AA875042 | Transcribed sequence with moderate similarity to protein ref:NP_073586.1 (H.sapiens)  | 3 | 154.3 | 55.5  |
| AA875043 | testis specific protein kinase 1                                                      | 3 | 84.6  | 30.9  |
| AA875047 | Transcribed sequence with weak similarity to protein pir:JQ0866 (R.norvegicus) JQ08   | 3 | 63.8  | 28.6  |
| AA875059 | Transcribed sequences                                                                 | 1 | 21.1  | 11.9  |
| AA875069 | UI-R-E0-cb-h-05-0-UI.s1 Rattus norvegicus cDNA                                        | 2 | 64    | 15    |
| AA875102 | Transcribed sequence with strong similarity to protein sp:P08578 (M.musculus) RUXE    | 3 | 106.3 | 28    |
| AA875121 | nuclear transcription factor-Y gamma                                                  | 1 | 227.2 | 135.7 |
| AA875124 | UI-R-E0-bu-c-06-0-UI.s2 Rattus norvegicus cDNA                                        | 2 | 244.3 | 142.5 |
| AA875146 | Transcribed sequence with strong similarity to protein ref:NP_067377.1 (M.musculus)   | 1 | 189.6 | 41.8  |
| AA875148 | Transcribed sequences                                                                 | 1 | 55.4  | 14.8  |
| AA875171 | UI-R-E0-ce-f-12-0-UI.s1 Rattus norvegicus cDNA                                        | 2 | 57.8  | 32.2  |
| AA875171 | UI-R-E0-ce-f-12-0-UI.s1 Rattus norvegicus cDNA                                        | 2 | 29.6  | 10.5  |
| AA875172 | SH3-domain kinase binding protein 1                                                   | 3 | 60.3  | 26.8  |
| AA875194 | Transcribed sequences                                                                 | 1 | 23.2  | 5.6   |
| AA875205 | Transcribed sequence with strong similarity to protein sp:P55884 (H.sapiens) IF39_HU  | 3 | 155.8 | 43.9  |
| AA875205 | UI-R-E0-cu-d-11-0-UI.s1 Rattus norvegicus cDNA                                        | 2 | 65.6  | 24.8  |
| AA875206 | ubiquilin 1                                                                           | 1 | 49.9  | 27.8  |
| AA875248 | Transcribed sequences                                                                 | 1 | 52.1  | 19.8  |
| AA875253 | ADP-ribosylation factor-like 1                                                        | 3 | 44.6  | 17.5  |
| AA875263 | Transcribed sequence with moderate similarity to protein ref:NP_058046.1 (M.musculu   | 3 | 85.1  | 33.3  |
| AA875268 | UI-R-E0-ce-b-04-0-UI.s1 Rattus norvegicus cDNA                                        | 2 | 45.3  | 15.9  |
| AA875291 | UI-R-E0-cn-e-02-0-UI.s1 Rattus norvegicus cDNA                                        | 2 | 35.9  | 14.8  |
| AA875327 | Transcribed sequence with weak similarity to protein ref:NP_072143.1 (R.norvegicus)   | 1 | 35.5  | 23.3  |
| AA875390 | thioredoxin-like (32kD)                                                               | 1 | 16.3  | 16.9  |
| AA875427 | amino-terminal enhancer of split                                                      | 1 | 23.6  | 9.7   |
| AA875431 | Transcribed sequence with weak similarity to protein ref:NP_068561.1 (M.musculus)     | 1 | 49.4  | 15.1  |
| AA875470 | UI-R-E0-cp-c-12-0-UI.s1 Rattus norvegicus cDNA                                        | 2 | 65.3  | 26.7  |
| AA875470 | UI-R-E0-cp-c-12-0-UI.s1 Rattus norvegicus cDNA                                        | 2 | 25.9  | 19.3  |
| AA875523 | Transcribed sequence with strong similarity to protein sp:Q64119 (R.norvegicus) MLE   | 3 | 28.5  | 15.5  |
| AA875523 | UI-R-E0-cv-e-11-0-UI.s1 Rattus norvegicus cDNA                                        | 2 | 37.8  | 23    |
| AA875537 | Transcribed sequence with weak similarity to protein ref:NP_112409.1 (R.norvegicus)   | 1 | 41.8  | 48.9  |
| AA875552 | Transcribed sequence with strong similarity to protein ref:NP_084528.1 (M.musculus)   | 1 | 84.9  | 22.5  |
| AA875559 | Transcribed sequences                                                                 | 1 | 20    | 13.1  |
| AA875594 | FK506-binding protein 1a                                                              | 3 | 117.9 | 60.8  |
| AA875630 | UI-R-E0-ct-e-12-0-UI.s1 Rattus norvegicus cDNA                                        | 2 | 36.7  | 12    |
| AA875633 | Transcribed sequence with moderate similarity to protein pdb:1LBG (E. coli) B Chain B | 1 | 65.8  | 60.5  |
| AA891035 | beclin 1 (coiled-coil, myosin-like BCL2-interacting protein)                          | 4 | 79    | 16.4  |
| AA891207 | Transcribed sequences                                                                 | 4 | 94.4  | 32    |
| AA891221 | Transcribed sequence with moderate similarity to protein ref:NP_080580.1 (M.musculu   | 1 | 66    | 38.5  |
| AA891226 | Transcribed sequence with strong similarity to protein sp:P28075 (R.norvegicus) PSB5  | 1 | 43.9  | 20.7  |
| AA891286 | thioredoxin reductase 1                                                               | 1 | 64.6  | 36.1  |
| AA891302 | Transcribed sequence with weak similarity to protein ref:NP_033032.1 (M.musculus)     | 1 | 13.4  | 11.7  |
| AA891322 | Transcribed sequence with weak similarity to protein sp:P13383 (R.norvegicus) NUCL    | 4 | 269.5 | 53.8  |
| AA891422 | hypoxia induced gene 1                                                                | 1 | 30.2  | 13.7  |
| AA891441 | Transcribed sequence with moderate similarity to protein pir:A53624 (R.norvegicus) A5 | 4 | 480.7 | 182.9 |
| AA891475 | Transcribed sequence with weak similarity to protein ref:NP_038467.1 (H.sapiens) pa   | 4 | 142.2 | 18.1  |
| AA891499 | EST195302                                                                             | 2 | 67.8  | 17.4  |
| AA891535 | EST195338                                                                             | 2 | 33.7  | 13.7  |
| AA891537 | Transcribed sequence with weak similarity to protein ref:NP_037432.1 (H.sapiens) pr   | 1 | 39.3  | 19.6  |
| AA891542 | Transcribed sequences                                                                 | 1 | 59.1  | 17.6  |
| AA891576 | Transcribed sequence with weak similarity to protein pir:S49158 (R.norvegicus) S4915  | 3 | 69.1  | 21    |
| AA891576 | EST195379                                                                             | 2 | 115.5 | 42.9  |
| AA891666 | melanoma antigen, family D, 1                                                         | 3 | 106.5 | 45.6  |

|          |                                                                                       |   |       |      |
|----------|---------------------------------------------------------------------------------------|---|-------|------|
| AA891669 | EST195472                                                                             | 2 | 73.2  | 18.6 |
| AA891670 | Transcribed sequence with moderate similarity to protein ref:NP_034894.1 (M.musculus) | 4 | 150.3 | 38.9 |
| AA891690 | Transcribed sequence with strong similarity to protein ref:NP_076006.1 (M.musculus)   | 1 | 145.9 | 41.4 |
| AA891713 | ribosomal protein L13A                                                                | 4 | 202.4 | 74.7 |
| AA891717 | upstream transcription factor 1                                                       | 4 | 129.1 | 28.5 |
| AA891725 | EST195528                                                                             | 2 | 42.5  | 25.4 |
| AA891727 | Transcribed sequence with strong similarity to protein ref:NP_080339.1 (M.musculus)   | 1 | 17.2  | 16.8 |
| AA891732 | Transcribed sequences                                                                 | 1 | 72    | 16.8 |
| AA891734 | Transcribed sequences                                                                 | 4 | 46.1  | 11.3 |
| AA891740 | thymic stromal-derived lymphopoietin, receptor                                        | 1 | 133   | 27.9 |
| AA891742 | EST195545                                                                             | 2 | 40.8  | 9    |
| AA891746 | Transcribed sequence with strong similarity to protein ref:NP_067494.1 (M.musculus)   | 1 | 42.8  | 20.2 |
| AA891751 | EST195554                                                                             | 2 | 57.4  | 10   |
| AA891769 | Fibronectin 1                                                                         | 1 | 131.8 | 46.8 |
| AA891785 | Transcribed sequence with weak similarity to protein sp:P41562 (R.norvegicus) IDHC    | 1 | 118.1 | 42.2 |
| AA891789 | Transcribed sequence with strong similarity to protein ref:NP_062742.1 (M.musculus)   | 4 | 115.9 | 38.6 |
| AA891790 | Transcribed sequences                                                                 | 1 | 20.3  | 12.4 |
| AA891797 | Transcribed sequence with strong similarity to protein pir:S55385 (M.musculus) S5538  | 4 | 597.7 | 25.9 |
| AA891810 | EST195613                                                                             | 2 | 130.4 | 43   |
| AA891810 | Transcribed sequence with weak similarity to protein prf:2118320A (R.norvegicus) 211  | 1 | 47.5  | 38.5 |
| AA891812 | adducin 1, alpha                                                                      | 1 | 84.7  | 46.2 |
| AA891818 | Transcribed sequences                                                                 | 1 | 49.8  | 16.8 |
| AA891821 | Transcribed sequence with strong similarity to protein ref:NP_056495.1 (H.sapiens) hy | 4 | 46.8  | 23.5 |
| AA891829 | GTP cyclohydrolase 1                                                                  | 1 | 24.8  | 19.3 |
| AA891842 | Transcribed sequence with weak similarity to protein ref:NP_057713.1 (H.sapiens) hy   | 4 | 145   | 106  |
| AA891872 | Transcribed sequence with strong similarity to protein pir:S54876 (M.musculus) S5487  | 3 | 75.2  | 29.7 |
| AA891873 | ATPase inhibitor                                                                      | 4 | 113.2 | 38.1 |
| AA891877 | EST195680                                                                             | 2 | 56.3  | 11.4 |
| AA891880 | tricarboxylate carrier-like protein                                                   | 4 | 71.2  | 27.1 |
| AA891881 | Transcribed sequences                                                                 | 1 | 53.8  | 18.5 |
| AA891890 | Transcribed sequence with moderate similarity to protein pir:T50839 (H.sapiens) T508  | 1 | 35.3  | 16.1 |
| AA891891 | Transcribed sequences                                                                 | 1 | 22    | 8.7  |
| AA891902 | Transcribed sequences                                                                 | 1 | 20.3  | 9.4  |
| AA891911 | Transcribed sequence with strong similarity to protein sp:Q63532 (R.norvegicus) COR   | 1 | 58.3  | 28.7 |
| AA891914 | Transcribed sequence with moderate similarity to protein pir:A47488 (H.sapiens) A474  | 1 | 56.4  | 26.9 |
| AA891916 | EST195719                                                                             | 2 | 34.5  | 13.9 |
| AA891916 | membrane interacting protein of RGS16                                                 | 1 | 30.3  | 22.2 |
| AA891917 | Transcribed sequences                                                                 | 3 | 90.7  | 21.5 |
| AA891920 | Transcribed sequence with strong similarity to protein pdb:1JKG (H.sapiens) A Chain A | 1 | 25.4  | 18.4 |
| AA891922 | Transcribed sequences                                                                 | 1 | 16.5  | 13.9 |
| AA891935 | calpain, small subunit 1                                                              | 4 | 89.6  | 9.6  |
| AA891938 | Transcribed sequence with moderate similarity to protein pir:I49635 (M.musculus) I496 | 1 | 12.2  | 7.9  |
| AA891940 | Transcribed sequence with strong similarity to protein ref:NP_476473.1 (R.norvegicus) | 4 | 107.6 | 29.6 |
| AA891944 | Transcribed sequences                                                                 | 1 | 23.8  | 9.2  |
| AA891965 | Transcribed sequence with strong similarity to protein ref:NP_071297.1 (M.musculus)   | 1 | 106.6 | 107  |
| AA891978 | EST195781                                                                             | 2 | 103.2 | 49.4 |
| AA891998 | EST195801                                                                             | 2 | 38.8  | 24.2 |
| AA892006 | Transcribed sequence with weak similarity to protein sp:P50517 (R.norvegicus) VAB2    | 4 | 163.5 | 26.8 |
| AA892010 | Transcribed sequence with weak similarity to protein ref:NP_080911.1 (M.musculus)     | 3 | 81.6  | 11.9 |
| AA892014 | HLA-B-associated transcript 1A                                                        | 1 | 20.6  | 11.1 |
| AA892041 | peroxiredoxin 6                                                                       | 4 | 120.3 | 32.2 |
| AA892042 | Transcribed sequence with weak similarity to protein pir:JC2534 (R.norvegicus) JC253  | 4 | 109.3 | 47.5 |
| AA892132 | Transcribed sequence with moderate similarity to protein ref:NP_060937.1 (H.sapiens)  | 4 | 95.7  | 36.4 |
| AA892146 | Rat VL30 element mRNA                                                                 | 4 | 325.2 | 51.6 |
| AA892154 | Transcribed sequence with moderate similarity to protein pdb:1LBG (E. coli) B Chain B | 4 | 73.4  | 11   |
| AA892234 | Transcribed sequence with strong similarity to protein ref:NP_079845.1 (M.musculus)   | 1 | 34.2  | 14.7 |
| AA892238 | Transcribed sequences                                                                 | 3 | 77.8  | 46.3 |
| AA892250 | Transcribed sequence with strong similarity to protein ref:NP_444322.1 (M.musculus)   | 3 | 62.5  | 25.3 |
| AA892259 | EST196062                                                                             | 2 | 28.5  | 3.5  |
| AA892303 | Transcribed sequences                                                                 | 1 | 37.5  | 7.1  |
| AA892313 | Transcribed sequence with moderate similarity to protein ref:NP_003184.1 (H.sapiens)  | 1 | 51.5  | 7.2  |
| AA892314 | isocitrate dehydrogenase 1                                                            | 4 | 48.3  | 9.6  |
| AA892325 | Transcribed sequence with strong similarity to protein ref:NP_006081.1 (H.sapiens) ch | 1 | 40.7  | 24.1 |
| AA892338 | Transcribed sequences                                                                 | 1 | 25.2  | 17.9 |
| AA892376 | Transcribed sequence with strong similarity to protein ref:NP_075361.2 (M.musculus)   | 4 | 140.7 | 40   |
| AA892378 | Transcribed sequence with strong similarity to protein ref:NP_079838.1 (M.musculus)   | 1 | 95.5  | 31.5 |
| AA892388 | Transcribed sequence with strong similarity to protein ref:NP_055141.2 (H.sapiens) de | 3 | 68    | 25.2 |
| AA892390 | solute carrier family 11 member 2                                                     | 1 | 33.8  | 17.2 |
| AA892394 | Transcribed sequence with moderate similarity to protein ref:NP_058893.1 (R.norvegic  | 1 | 23.8  | 8.9  |
| AA892425 | Transcribed sequences                                                                 | 3 | 42.5  | 12.7 |
| AA892465 | Transcribed sequence with moderate similarity to protein sp:P42694 (H.sapiens) Y054   | 4 | 198   | 74.6 |
| AA892470 | Calmodulin 1 (phosphorylase kinase, delta)                                            | 3 | 46.2  | 20.8 |
| AA892486 | Transcribed sequence with weak similarity to protein sp:P23739 (R.norvegicus) SUI5    | 1 | 112.5 | 44   |
| AA892498 | Transcribed sequence with weak similarity to protein sp:P28648 (R.norvegicus) CD63    | 1 | 124.6 | 28.7 |
| AA892506 | coronin, actin binding protein 1A                                                     | 4 | 95.3  | 51.9 |
| AA892520 | Transcribed sequence with weak similarity to protein ref:NP_058905.1 (R.norvegicus)   | 4 | 245.2 | 25.5 |
| AA892520 | EST196323                                                                             | 2 | 129.7 | 31.3 |
| AA892532 | protein disulfide isomerase-related protein                                           | 3 | 99.3  | 66.2 |
| AA892544 | Neural precursor cell expressed, developmentally down-regulated gene 8                | 4 | 248.7 | 70.9 |

|          |                                                                                         |   |       |       |
|----------|-----------------------------------------------------------------------------------------|---|-------|-------|
| AA892549 | Transcribed sequences                                                                   | 1 | 18.1  | 5.4   |
| AA892550 | Transcribed sequences                                                                   | 3 | 41.8  | 12.7  |
| AA892554 | Transcribed sequence with weak similarity to protein pir:DDRT (R.norvegicus) DDRT       | 1 | 23    | 5.6   |
| AA892557 | spermidine synthase                                                                     | 3 | 42.9  | 22.8  |
| AA892572 | Transcribed sequence with strong similarity to protein ref:NP_079639.1 (M.musculus)     | 1 | 61.1  | 19.5  |
| AA892598 | nucleostemin                                                                            | 1 | 21.4  | 13.1  |
| AA892616 | solute carrier family 13 (sodium-dependent dicarboxylate transporter), member 3         | 3 | 60.7  | 34.7  |
| AA892750 | Transcribed sequences                                                                   | 1 | 23.1  | 8.6   |
| AA892768 | Transcribed sequence with weak similarity to protein ref:NP_080197.1 (M.musculus)       | 1 | 56.6  | 28.4  |
| AA892773 | Transcribed sequence with moderate similarity to protein pdb:1LBG (E. coli) B Chain B   | 3 | 117.6 | 38.1  |
| AA892796 | Transcribed sequences                                                                   | 1 | 99.7  | 29.2  |
| AA892801 | eukaryotic translation elongation factor 2                                              | 3 | 147.8 | 24.6  |
| AA892801 | EST196604                                                                               | 2 | 81.7  | 47.3  |
| AA892808 | isocitrate dehydrogenase 3, gamma                                                       | 1 | 22.7  | 13.7  |
| AA892818 | Transcribed sequence with weak similarity to protein pir:S54293 (R.norvegicus) S5429    | 1 | 15.5  | 11.1  |
| AA892829 | Transcribed sequence with strong similarity to protein prf:2204316A (M.musculus) 220    | 1 | 60.1  | 12.7  |
| AA892831 | Transcribed sequence with strong similarity to protein pir:JC6524 (H.sapiens) JC6524    | 3 | 82.8  | 45    |
| AA892842 | Transcribed sequence with weak similarity to protein sp:Q9WUV6 (R.norvegicus) CAZ       | 3 | 128.2 | 67    |
| AA892843 | Transcribed sequence with moderate similarity to protein ref:NP_078816.1 (H.sapiens)    | 1 | 20.6  | 11    |
| AA892851 | Transcribed sequences                                                                   | 1 | 72.8  | 33.8  |
| AA892851 | Transcribed sequences                                                                   | 1 | 42.4  | 21.7  |
| AA892859 | procollagen-lysine, 2-oxoglutarate 5-dioxygenase 3                                      | 1 | 118.6 | 42.9  |
| AA892860 | EST196663                                                                               | 2 | 91.4  | 32.6  |
| AA892868 | Transcribed sequences                                                                   | 3 | 58    | 19.1  |
| AA892895 | ribosomal protein S15                                                                   | 4 | 312.3 | 940.7 |
| AA892918 | Transcribed sequence with moderate similarity to protein pir:I60307 (E. coli) I60307 be | 1 | 14.9  | 10.6  |
| AA892919 | nucleolar phosphoprotein p130                                                           | 1 | 158.4 | 30.3  |
| AA892921 | Rat mRNA fragment with B2 repetitive sequence (clone pAR24)                             | 1 | 46.3  | 20.6  |
| AA892940 | Transcribed sequence with weak similarity to protein sp:P05197 (R.norvegicus) EF2       | 1 | 39.1  | 10.7  |
| AA892942 | Transcribed sequence with strong similarity to protein ref:NP_057162.1 (H.sapiens) C    | 1 | 17.8  | 12    |
| AA892993 | Transcribed sequence with strong similarity to protein ref:NP_034570.1 (M.musculus)     | 1 | 59.1  | 37.6  |
| AA892999 | Transcribed sequences                                                                   | 1 | 87.3  | 36.6  |
| AA893002 | Transcribed sequences                                                                   | 1 | 38.8  | 10.4  |
| AA893043 | Transcribed sequences                                                                   | 1 | 15.6  | 10    |
| AA893065 | Transcribed sequence with strong similarity to protein prf:2202260A (M.musculus) 220    | 1 | 40.5  | 19.9  |
| AA893088 | EST196891                                                                               | 2 | 125.3 | 47.7  |
| AA893127 | signal sequence receptor 4                                                              | 4 | 116.7 | 45.8  |
| AA893173 | Transcribed sequence with strong similarity to protein ref:NP_062754.1 (M.musculus)     | 1 | 53    | 36.8  |
| AA893183 | EST196986                                                                               | 2 | 150.9 | 67.1  |
| AA893185 | Transcribed sequence with moderate similarity to protein ref:NP_002483.1 (H.sapiens)    | 1 | 45.3  | 14.2  |
| AA893199 | EST197002                                                                               | 2 | 40.7  | 19.7  |
| AA893224 | Transcribed sequence with strong similarity to protein sp:O94966 (H.sapiens) UBPJ_H     | 4 | 115   | 30.3  |
| AA893242 | fatty acid Coenzyme A ligase, long chain 2                                              | 1 | 53.5  | 11.6  |
| AA893260 | Transcribed sequence with weak similarity to protein ref:NP_083358.1 (M.musculus)       | 3 | 53.8  | 13.3  |
| AA893267 | Transcribed sequence with weak similarity to protein pir:S46992 (R.norvegicus) S4699    | 1 | 26.9  | 15    |
| AA893280 | Transcribed sequence with weak similarity to protein sp:P43884 (R.norvegicus) PLIN_     | 1 | 151.7 | 41.7  |
| AA893289 | Transcribed sequence with moderate similarity to protein pdb:1LBG (E. coli) B Chain B   | 4 | 196.2 | 82.9  |
| AA893307 | EST197110                                                                               | 2 | 31.4  | 15.4  |
| AA893328 | calnexin                                                                                | 1 | 19.6  | 14.1  |
| AA893353 | Transcribed sequence with strong similarity to protein sp:Q9Z2W0 (M.musculus) DNP6      | 1 | 48.8  | 28.6  |
| AA893436 | Transcribed sequences                                                                   | 1 | 43.9  | 14.2  |
| AA893493 | Prostaglandin D synthase                                                                | 4 | 777.2 | 396.5 |
| AA893515 | EST197318                                                                               | 2 | 36.3  | 24.3  |
| AA893532 | Transcribed sequences                                                                   | 1 | 32.1  | 16    |
| AA893603 | EST197406                                                                               | 2 | 84.8  | 24.5  |
| AA893607 | Transcribed sequences                                                                   | 1 | 43    | 21.5  |
| AA893666 | Transcribed sequence with weak similarity to protein ref:NP_057646.1 (H.sapiens) to     | 1 | 15.9  | 26.4  |
| AA893670 | Transcribed sequences                                                                   | 1 | 32.9  | 16.8  |
| AA893673 | RAB28, member RAS oncogene family                                                       | 1 | 15.9  | 12.5  |
| AA893683 | Transcribed sequence with strong similarity to protein sp:Q9QXK7 (M.musculus) CPSQ      | 4 | 53.8  | 11.1  |
| AA893690 | Transcribed sequence with strong similarity to protein ref:NP_062308.1 (M.musculus)     | 1 | 17.1  | 12.2  |
| AA893699 | Transcribed sequence with moderate similarity to protein ref:NP_034891.1 (M.musculu     | 1 | 26.9  | 15.3  |
| AA893708 | Transcribed sequence with strong similarity to protein pir:T00333 (H.sapiens) T00333    | 1 | 17.2  | 13.9  |
| AA893717 | EST197520                                                                               | 2 | 36.1  | 9.5   |
| AA893860 | Transcribed sequence with strong similarity to protein ref:NP_149065.1 (M.musculus)     | 1 | 67.2  | 21    |
| AA893869 | Transcribed sequence with weak similarity to protein ref:NP_508799.1 (C.elegans) F1     | 1 | 62.5  | 32    |
| AA893870 | EST197673                                                                               | 2 | 87    | 37.9  |
| AA893939 | Transcribed sequence with strong similarity to protein ref:NP_033195.1 (M.musculus)     | 3 | 52.5  | 15.4  |
| AA893970 | Transcribed sequences                                                                   | 1 | 25    | 8.7   |
| AA894089 | protein carrying the RING-H2 sequence motif                                             | 1 | 21.3  | 13.3  |
| AA894090 | Transcribed sequences                                                                   | 1 | 147.8 | 44.5  |
| AA894099 | vacuolar protein sorting protein 4a                                                     | 3 | 111.8 | 17.6  |
| AA894101 | Transcribed sequence with strong similarity to protein sp:Q64311 (M.musculus) PNAD      | 4 | 51.6  | 14    |
| AA894101 | Transcribed sequence with strong similarity to protein sp:Q64311 (M.musculus) PNAD      | 1 | 35.5  | 17.3  |
| AA894130 | Transcribed sequence with weak similarity to protein prf:2019243A (R.norvegicus) 201    | 1 | 46.2  | 12.7  |
| AA894131 | Transcribed sequence with strong similarity to protein ref:NP_005457.1 (H.sapiens) R    | 1 | 30.1  | 23.6  |
| AA894148 | ---                                                                                     | 4 | 79.3  | 30.9  |
| AA894160 | src associated in mitosis, 68 kDa                                                       | 1 | 39.4  | 14.3  |
| AA894165 | Transcribed sequence with strong similarity to protein ref:NP_075781.1 (M.musculus)     | 1 | 25    | 8.9   |

|          |                                                                                       |   |       |       |
|----------|---------------------------------------------------------------------------------------|---|-------|-------|
| AA894188 | Transcribed sequence with moderate similarity to protein pdb:1BGM (E. coli) O Chain   | 1 | 22.5  | 10.6  |
| AA894207 | Rattus norvegicus focal adhesion kinase (FAK) mRNA, alternative 5'UTR                 | 3 | 41.8  | 25.6  |
| AA894212 | Transcribed sequences                                                                 | 1 | 40.1  | 19.2  |
| AA894259 | Transcribed sequence with weak similarity to protein ref:NP_543178.1 (R.norvegicus)   | 4 | 98.7  | 51    |
| AA894264 | Transcribed sequence with moderate similarity to protein sp:O54940 (M.musculus) NIF   | 1 | 47.9  | 33.5  |
| AA894282 | EST198085                                                                             | 2 | 30.1  | 15.7  |
| AA894292 | Transcribed sequences                                                                 | 3 | 95.8  | 8.7   |
| AA894312 | Transcribed sequences                                                                 | 1 | 29.8  | 28.5  |
| AA894317 | chimerin (chimaerin) 1                                                                | 1 | 28.9  | 18.6  |
| AA894330 | calcium/calmodulin-dependent protein kinase II, delta                                 | 4 | 102.5 | 20.5  |
| AA894345 | EST198148                                                                             | 2 | 70.4  | 16.7  |
| AA899106 | cyclin D2                                                                             | 3 | 73.1  | 21.6  |
| AA899253 | myristoylated alanine rich protein kinase C substrate                                 | 3 | 143.3 | 39.7  |
| AA899320 | Transcribed sequence with moderate similarity to protein ref:NP_004536.1 (H.sapiens)  | 1 | 37    | 43    |
| AA899808 | Lysosomal associated membrane protein 1 (120 kDa)                                     | 1 | 36.7  | 18.2  |
| AA899854 | UI-R-E0-cq-h-04-0-UI.s2 Rattus norvegicus cDNA                                        | 2 | 32.2  | 15.3  |
| AA900199 | Rattus norvegicus DD6C4-4 mRNA, partial sequence                                      | 4 | 70    | 31.1  |
| AA900413 | UI-R-E0-dl-e-12-0-UI.s1 Rattus norvegicus cDNA                                        | 2 | 70.4  | 16.9  |
| AA900503 | UI-R-E0-dl-b-05-0-UI.s1 Rattus norvegicus cDNA                                        | 2 | 52.8  | 41.7  |
| AA900505 | rhoB gene                                                                             | 3 | 40.1  | 16.5  |
| AA924326 | aldolase A                                                                            | 4 | 463.9 | 75.1  |
| AA924542 | UI-R-A1-dz-e-12-0-UI.s1 Rattus norvegicus cDNA                                        | 2 | 66.6  | 18.7  |
| AA924909 | peripheral myelin protein 22                                                          | 3 | 33.8  | 8.1   |
| AA925473 | cell division cycle 42 homolog (S. cerevisiae)                                        | 3 | 110.3 | 84.7  |
| AA925473 | cell division cycle 42 homolog (S. cerevisiae)                                        | 3 | 92.3  | 41.4  |
| AA925556 | Transcribed sequence with strong similarity to protein ref:NP_075809.1 (M.musculus)   | 4 | 59.6  | 17.9  |
| AA925762 | myristoylated alanine rich protein kinase C substrate                                 | 1 | 20.3  | 15.3  |
| AA926129 | Transcribed sequence with strong similarity to protein ref:NP_446139.1 (R.norvegicus) | 3 | 107.1 | 48.9  |
| AA926137 | Transcribed sequence with strong similarity to protein ref:NP_079926.1 (M.musculus)   | 3 | 187.6 | 97.1  |
| AA926242 | UI-R-A1-eq-d-09-0-UI.s1 Rattus norvegicus cDNA                                        | 2 | 24.6  | 16.2  |
| AA933158 | UI-R-E0-bp-g-09-0-UI.s2 Rattus norvegicus cDNA                                        | 2 | 78.7  | 11    |
| AA943555 | linker of T-cell receptor pathways                                                    | 1 | 61    | 10.4  |
| AA943677 | Munc13-3                                                                              | 1 | 26.8  | 18.3  |
| AA944073 | ribosomal protein L41                                                                 | 4 | 115.1 | 24.8  |
| AA944324 | ADP-ribosylation factor 6                                                             | 4 | 74.6  | 21.8  |
| AA944397 | heat shock protein 86                                                                 | 1 | 37.8  | 15.4  |
| AA945054 | cytochrome b5                                                                         | 4 | 49.1  | 35.4  |
| AA945169 | Transthyretin (prealbumin, amyloidosis type I)                                        | 1 | 34.2  | 15.6  |
| AA945608 | serum amyloid P-component                                                             | 1 | 28.5  | 13    |
| AA946044 | lyn protein non-receptor kinase                                                       | 1 | 24    | 12.6  |
| AA946313 | Secreted acidic cysteine-rich glycoprotein (osteonectin)                              | 1 | 27.2  | 12.4  |
| AA955306 | ras-related protein rab10                                                             | 3 | 132.6 | 38.8  |
| AA955600 | Fibronectin 1                                                                         | 3 | 100.6 | 35.4  |
| AA955983 | Transcribed sequence with weak similarity to protein sp:P20291 (R.norvegicus) FLAP    | 3 | 72.2  | 25.2  |
| AA956958 | ADP-ribosylation factor-like 5                                                        | 1 | 20.9  | 11.6  |
| AA957132 | N-acetylglucosaminyltransferase I                                                     | 1 | 48.9  | 27.1  |
| AA957218 | cyclin D1                                                                             | 1 | 113.8 | 42.4  |
| AA957510 | ATPase, Ca++ transporting, cardiac muscle, slow twitch 2                              | 3 | 89.2  | 24    |
| AA957640 | DNA polymerase beta                                                                   | 3 | 57.3  | 19.8  |
| AA957777 | Transcribed sequence with strong similarity to protein pdb:1A2K (R.norvegicus) B Cha  | 1 | 54.1  | 30.5  |
| AA957896 | mitogen activated protein kinase kinase 2                                             | 1 | 51.1  | 17    |
| AA963674 | mitogen activated protein kinase kinase 2                                             | 3 | 53.3  | 31.6  |
| AA964379 | adaptor-related protein complex 2, beta 1 subunit                                     | 1 | 36.3  | 7.9   |
| AA965154 | tyrosine 3-monooxygenase/tryptophan 5-monooxygenase activation protein, epsilon po    | 4 | 157.2 | 46.5  |
| AA997806 | Transcribed sequence with weak similarity to protein ref:NP_570953.1 (M.musculus)     | 1 | 88.1  | 51.4  |
| AB000280 | peptide/histidine transporter                                                         | 1 | 30.4  | 10.3  |
| AB000491 | for proteasomal ATPase (SUG1)                                                         | 3 | 42    | 16.4  |
| AB000717 | non-hepatic-type S-adenosylmethionine synthetase                                      | 1 | 40.3  | 11.9  |
| AB001347 | beta-spectrin 3                                                                       | 1 | 36.1  | 22.2  |
| AB002086 | mRNA for p47                                                                          | 2 | 67.7  | 32.5  |
| AB002086 | p47 protein                                                                           | 1 | 81.4  | 21.6  |
| AB003042 | complement component 5, receptor 1                                                    | 1 | 115.6 | 48.3  |
| AB003515 | GEF-2                                                                                 | 2 | 53.6  | 22.8  |
| AB005143 | Uncoupling protein 2, mitochondrial                                                   | 4 | 200.5 | 44.5  |
| AB006450 | translocator of inner mitochondrial membrane 17a (yeast)                              | 1 | 48    | 20.2  |
| AB006451 | translocase of inner mitochondrial membrane 23 homolog (yeast)                        | 4 | 99.5  | 15.6  |
| AB006802 | protocadherin 6                                                                       | 2 | 32.3  | 9.5   |
| AB008807 | glutathione-dependent dehydroascorbate reductase                                      | 4 | 65.2  | 44.8  |
| AB010119 | t-complex testis expressed 1                                                          | 4 | 68.1  | 19.4  |
| AB010743 | Uncoupling protein 2, mitochondrial                                                   | 4 | 592.1 | 113.4 |
| AB012234 | NF1-X1                                                                                | 2 | 78.6  | 22.6  |
| AB012933 | fatty acid Coenzyme A ligase, long chain 5                                            | 1 | 25.4  | 18.1  |
| AB013112 | aquaporin 9                                                                           | 4 | 52    | 32.8  |
| AB013732 | UDP-glucose dehydrogeanse                                                             | 3 | 274.7 | 173.1 |
| AB015191 | Rhesus blood group CE and D                                                           | 1 | 32.6  | 28.9  |
| AB015433 | 4F2 heavy chain (4F2hc), complete cds                                                 | 2 | 126.6 | 35    |
| AB016489 | jumping translocation breakpoint                                                      | 4 | 41.5  | 6.2   |
| AB017140 | homer, neuronal immediate early gene, 1                                               | 3 | 51.2  | 20.9  |
| AB017140 | homer, neuronal immediate early gene, 1                                               | 3 | 34.7  | 4.2   |

|          |                                                                                             |   |       |       |
|----------|---------------------------------------------------------------------------------------------|---|-------|-------|
| AB017170 | Slit-1 protein                                                                              | 2 | 53.2  | 23.2  |
| AB017188 | proteasome (prosome, macropain) 26S subunit, non-ATPase,4                                   | 1 | 104.7 | 25.1  |
| AB017655 | muscarinic receptor m2                                                                      | 3 | 24.8  | 15    |
| AB017912 | Smad2 protein                                                                               | 2 | 32.3  | 12.3  |
| AB017912 | MAD homolog 2 (Drosophila)                                                                  | 1 | 47.9  | 26.3  |
| AB018049 | sialyltransferase 9 (CMP-NeuAc:lactosylceramide alpha-2,3-sialyltransferase; GM3 syn        | 1 | 109.4 | 29.9  |
| AF003926 | nuclear receptor subfamily 2, group F, member 6                                             | 1 | 65.4  | 28    |
| AF007107 | cytochrome b5                                                                               | 4 | 88.5  | 55.8  |
| AF007583 | collagen-like tail subunit (single strand of homotrimer) of asymmetric acetylcholinesterase | 1 | 120.7 | 46.1  |
| AF008439 | solute carrier family 11 member 2                                                           | 3 | 118.3 | 55.2  |
| AF008439 | solute carrier family 11 member 2                                                           | 1 | 14.7  | 9     |
| AF008554 | implantation-associated protein (IAG2)                                                      | 2 | 42.3  | 14.9  |
| AF009329 | basic helix-loop-helix domain containing, class B3                                          | 4 | 114.5 | 36.8  |
| AF016252 | spinophilin                                                                                 | 3 | 138.1 | 45.8  |
| AF017437 | integrin-associated protein                                                                 | 1 | 34    | 11.1  |
| AF019565 | hypocretin                                                                                  | 1 | 123.1 | 79.2  |
| AF020211 | dynamin 1-like                                                                              | 1 | 25.8  | 5.6   |
| AF020756 | purinergic receptor P2X, ligand-gated ion channel, 2                                        | 4 | 132.6 | 49    |
| AF021882 | prostaglandin D2 synthase 2                                                                 | 4 | 91    | 10.2  |
| AF022083 | Guanine nucleotide-binding protein beta 1                                                   | 1 | 48.6  | 18    |
| AF023087 | early growth response 1                                                                     | 4 | 74.3  | 22    |
| AF025308 | MHC class Ib antigen                                                                        | 4 | 340.2 | 54.8  |
| AF027954 | Bcl-2-related ovarian killer protein                                                        | 2 | 62.3  | 20.8  |
| AF029240 | Rat MHC class I RT1.C/E mRNA, 3' end                                                        | 4 | 86.3  | 35.4  |
| AF029240 | MHC class Ib RT1.S3 (RT1.S3) gene                                                           | 2 | 21.2  | 13.7  |
| AF030090 | Rattus norvegicus activity and neurotransmitter-induced early gene 5 (ania-5) mRNA, 3       | 1 | 21.6  | 15.2  |
| AF030358 | chemokine (C-X3-C motif) ligand 1                                                           | 3 | 31.6  | 18.6  |
| AF031430 | syntaxin 7                                                                                  | 1 | 41.4  | 26.9  |
| AF032120 | regulator of G-protein signaling 19 interacting protein 1                                   | 1 | 28.9  | 16.6  |
| AF033109 | syntaxin 8                                                                                  | 1 | 39.8  | 24    |
| AF034218 | hyaluronidase 2                                                                             | 1 | 78.7  | 24.9  |
| AF034237 | Rattus norvegicus DD6A4-1 mRNA, partial sequence                                            | 4 | 64.9  | 17.2  |
| AF034582 | vesicle associated protein                                                                  | 1 | 23.9  | 13.6  |
| AF034900 | olfactory receptor-like protein (SCR D-7)                                                   | 2 | 332.1 | 211.2 |
| AF035387 | ATPase, H+ transporting, lysosomal (vacuolar proton pump), subunit 1                        | 4 | 105.1 | 48.7  |
| AF036537 | homocysteine respondent protein HCYP2                                                       | 3 | 18    | 10.1  |
| AF038591 | cytoplasmic aminopeptidase P                                                                | 1 | 79.2  | 28.6  |
| AF039085 | synaptogyrin 2                                                                              | 1 | 57.2  | 10.8  |
| AF039212 | UDP glycosyltransferase 1 family, polypeptide A7                                            | 4 | 94.1  | 28.8  |
| AF041106 | tulip 1 mRNA                                                                                | 2 | 42.9  | 13.8  |
| AF042830 | proto-oncogene tyrosine kinase receptor Ret                                                 | 1 | 25.7  | 5.3   |
| AF044058 | androgen receptor interacting protein mRNA, complete cds                                    | 2 | 38.5  | 8.3   |
| AF044574 | 2-4-dienoyl-Coenzyme A reductase 2, peroxisomal                                             | 1 | 25.4  | 12.6  |
| AF045464 | aflatoxin B1 aldehyde reductase                                                             | 1 | 20.3  | 14.7  |
| AF045564 | development-related protein                                                                 | 2 | 55.3  | 19.7  |
| AF047707 | UDP-glucose:ceramide glycosyltransferase                                                    | 4 | 44    | 12.3  |
| AF050659 | Rattus norvegicus activity and neurotransmitter-induced early gene 7 (ania-7) mRNA, 3       | 1 | 25.3  | 8.5   |
| AF051895 | annexin 5                                                                                   | 1 | 70.5  | 38.2  |
| AF052042 | zinc finger protein Y1 (RLZF-Y)                                                             | 1 | 30.2  | 8.1   |
| AF052596 | SNAP-23 mRNA, complete cds                                                                  | 2 | 23.2  | 7.3   |
| AF053092 | polo-like kinase isoform mRNA, partial cds                                                  | 2 | 55.1  | 14    |
| AF053312 | small inducible cytokine subfamily A20                                                      | 1 | 21.8  | 4.6   |
| AF055065 | protein tyrosine phosphatase, non-receptor type substrate 1                                 | 3 | 50.8  | 13.9  |
| AF055292 | signal transducer and activator of transcription 6 (stat6)                                  | 1 | 44.3  | 14    |
| AF058787 | heme oxygenase-3 (HO-3)                                                                     | 1 | 33.2  | 14.5  |
| AF064541 | vasopressin V1b receptor variant                                                            | 2 | 31.5  | 9.9   |
| AF065433 | BCL2-like 11 (apoptosis facilitator)                                                        | 1 | 62.6  | 35    |
| AF068136 | regulator of G-protein signalling 19                                                        | 1 | 32.8  | 15.7  |
| AF068202 | A-kinase anchor protein121 mRNA, complete cds                                               | 2 | 29.8  | 14.4  |
| AF068860 | defensin beta 1                                                                             | 1 | 15.3  | 7.4   |
| AF071225 | cyclophilin B                                                                               | 1 | 44.6  | 30.9  |
| AF073839 | dynein-associated protein RKM23                                                             | 1 | 172.9 | 33.7  |
| AF074608 | MHC class I antigen                                                                         | 3 | 147.3 | 44.5  |
| AF074609 | MHC class I antigen (RT1.EC3) gene, complete cds                                            | 2 | 134.9 | 39.6  |
| AF077354 | heat shock 70 kDa protein 4                                                                 | 1 | 14.7  | 8.8   |
| AF080435 | phosducin-like protein                                                                      | 1 | 30.1  | 5.7   |
| AF081148 | CL2AA mRNA, complete cds                                                                    | 2 | 32.9  | 6.3   |
| AF081503 | apoptosis inhibitor 2                                                                       | 1 | 28.5  | 28.6  |
| AF082126 | Aryl hydrocarbon receptor                                                                   | 1 | 25.4  | 4.7   |
| AF087431 | glycoprotein processing glucosidase I                                                       | 2 | 51.3  | 7.4   |
| AF087437 | core binding factor beta                                                                    | 1 | 104   | 48.2  |
| AF087697 | dlg 3 mRNA, partial cds                                                                     | 2 | 36    | 14.1  |
| AF090306 | retinoblastoma binding protein 7                                                            | 4 | 63.5  | 29.7  |
| AF091561 | AIV-LY1 olfactory receptor                                                                  | 3 | 89.2  | 72    |
| AF091563 | QIL-LD1 olfactory receptor mRNA, partial cds                                                | 2 | 52.1  | 43    |
| AF091569 | olfactory receptor 41                                                                       | 1 | 71.1  | 31.4  |
| AF091570 | olfactory receptor 41                                                                       | 4 | 415.2 | 249.5 |
| AF091573 | olfactory receptor 41                                                                       | 1 | 58.1  | 25.7  |
| AF091578 | EVA-TN1 olfactory receptor                                                                  | 1 | 49.8  | 23.3  |

|          |                                                                                      |   |       |       |
|----------|--------------------------------------------------------------------------------------|---|-------|-------|
| AF093139 | nuclear RNA export factor 1 homolog (S. cerevisiae)                                  | 4 | 71.4  | 20.4  |
| AF093773 | cytosolic malate dehydrogenase                                                       | 2 | 97.2  | 31.7  |
| AF095576 | adaptor protein with pleckstrin homology and src homology 2 domains                  | 3 | 51.9  | 14.2  |
| AF100421 | LYRIC                                                                                | 1 | 22.2  | 13.3  |
| AF100470 | ribosome associated membrane protein 4                                               | 3 | 100.7 | 27.2  |
| AF100470 | ribosome associated membrane protein 4                                               | 1 | 14.7  | 8.4   |
| AI007824 | Transcribed sequences                                                                | 4 | 372.7 | 168.8 |
| AI008074 | heat shock protein 90 beta                                                           | 4 | 50.7  | 19.4  |
| AI008815 | cytochrome c, somatic                                                                | 3 | 42.7  | 21.3  |
| AI008836 | high mobility group box 2                                                            | 4 | 60.4  | 21.2  |
| AI008888 | cystatin B                                                                           | 4 | 84.1  | 40.6  |
| AI009111 | EST203562                                                                            | 2 | 52.2  | 6.9   |
| AI009147 | Transcribed sequence with strong similarity to protein ref:NP_076320.1 (M.musculus)  | 4 | 90.6  | 28.7  |
| AI009191 | Fyn proto-oncogene                                                                   | 4 | 48.6  | 23.9  |
| AI009268 | EST203719                                                                            | 2 | 49.8  | 20.5  |
| AI009390 | Transcribed sequence with moderate similarity to protein sp:O43920 (H.sapiens) NIPM  | 1 | 81    | 32.7  |
| AI010110 | EST204561                                                                            | 2 | 40.8  | 20.8  |
| AI010357 | progesterone receptor membrane component 1                                           | 1 | 29.7  | 13.2  |
| AI010480 | malate dehydrogenase, mitochondrial                                                  | 4 | 92.6  | 52.7  |
| AI010480 | malate dehydrogenase, mitochondrial                                                  | 1 | 38.8  | 30    |
| AI010581 | diazepam binding inhibitor                                                           | 1 | 24.7  | 13.5  |
| AI010725 | calnexin                                                                             | 4 | 120.5 | 65.1  |
| AI010725 | calnexin                                                                             | 3 | 101.5 | 24.2  |
| AI011179 | EST205630                                                                            | 2 | 21.1  | 12.5  |
| AI012534 | general transcription factor IIa, 2 (12kD subunit)                                   | 1 | 40.9  | 14    |
| AI012589 | EST 207040                                                                           | 2 | 287.9 | 113.4 |
| AI012595 | Protein phosphatase 2 (formerly 2A), catalytic subunit, alpha isoform                | 3 | 61.6  | 35.3  |
| AI012604 | eukaryotic initiation factor 5 (eIF-5)                                               | 1 | 36.1  | 26.1  |
| AI012802 | Hydroxyacyl glutathione hydrolase                                                    | 1 | 35.7  | 21.3  |
| AI012807 | adaptor-related protein complex 2, mu 1 subunit                                      | 1 | 246.7 | 60.2  |
| AI013194 | eukaryotic initiation factor 5 (eIF-5)                                               | 3 | 55.3  | 36.8  |
| AI013297 | EST207972                                                                            | 2 | 25.6  | 12    |
| AI013297 | Transcribed sequence with strong similarity to protein ref:NP_035017.1 (M.musculus)  | 1 | 31    | 17.4  |
| AI013513 | casein kinase 1, delta                                                               | 3 | 43.7  | 28.2  |
| AI013834 | EST208509                                                                            | 2 | 54.1  | 8.3   |
| AI014091 | Cbp/p300-interacting transactivator, with Glu/Asp-rich carboxy-terminal domain, 2    | 1 | 29.1  | 18.1  |
| AI014094 | Transcribed sequence with moderate similarity to protein ref:NP_055153.1 (H.sapiens) | 1 | 71.4  | 32.7  |
| AI014169 | upregulated by 1,25-dihydroxyvitamin D-3                                             | 4 | 118.6 | 53.5  |
| AI028975 | adaptor protein complex AP-1, beta 1 subunit                                         | 1 | 35    | 12.1  |
| AI029805 | UI-R-C0-jn-b-01-0-UI.s1 Rattus norvegicus cDNA                                       | 2 | 28.4  | 21.2  |
| AI044341 | valosin-containing protein                                                           | 4 | 82.4  | 26.4  |
| AI044390 | UI-R-C0-is-c-06-0-UI.s1 Rattus norvegicus cDNA                                       | 2 | 21.1  | 12    |
| AI044423 | UI-R-C1-jw-a-11-0-UI.s1 Rattus norvegicus cDNA                                       | 2 | 82.3  | 20.6  |
| AI044739 | splicing factor YT521-B                                                              | 1 | 24.5  | 17.5  |
| AI045249 | Transcribed sequence with moderate similarity to protein ref:NP_149107.1 (H.sapiens) | 1 | 33.5  | 16.1  |
| AI045558 | translocase of inner mitochondrial membrane 44 homolog (yeast)                       | 4 | 96.1  | 48.9  |
| AI059508 | transketolase                                                                        | 1 | 29.8  | 21.8  |
| AI059963 | vacuolar protein sorting homolog r-vps33b                                            | 4 | 232.1 | 154.4 |
| AI070108 | Transcribed sequence with moderate similarity to protein ref:NP_444504.1 (H.sapiens) | 1 | 20.6  | 3.6   |
| AI070295 | growth arrest and DNA-damage-inducible 45 alpha                                      | 1 | 44    | 61.5  |
| AI070295 | growth arrest and DNA-damage-inducible 45 alpha                                      | 1 | 22.6  | 23    |
| AI070967 | acidic nuclear phosphoprotein 32 family, member A                                    | 1 | 32.9  | 16.4  |
| AI071299 | TGFB inducible early growth response                                                 | 1 | 22.4  | 16.1  |
| AI072435 | UI-R-C2-nk-c-03-0-UI.s1 Rattus norvegicus cDNA                                       | 2 | 60.4  | 15    |
| AI073056 | kinesin light chain 1                                                                | 1 | 33.9  | 0.3   |
| AI073164 | secretory carrier membrane protein 1                                                 | 1 | 33.4  | 14.9  |
| AI073204 | tyrosine 3-monooxygenase/tryptophan 5-monooxygenase activation protein, epsilon po   | 4 | 60.2  | 23    |
| AI102505 | cytochrome c oxidase, subunit VIIIa                                                  | 4 | 924.9 | 308.5 |
| AI102620 | Transcribed sequences                                                                | 1 | 43    | 16.1  |
| AI102917 | EST212206                                                                            | 2 | 42.6  | 15.8  |
| AI103498 | ribosomal protein L5                                                                 | 4 | 38.9  | 8.2   |
| AI103957 | CD 81 antigen                                                                        | 4 | 252.9 | 38.4  |
| AI104012 | EST213301                                                                            | 2 | 49.7  | 23.4  |
| AI104399 | triosephosphate isomerase 1                                                          | 4 | 156.7 | 87.2  |
| AI104513 | EST213802                                                                            | 2 | 52.4  | 12.9  |
| AI104524 | heterogeneous nuclear ribonucleoprotein A/B                                          | 4 | 97.1  | 27    |
| AI104528 | EST213817                                                                            | 2 | 87    | 41.2  |
| AI104567 | actin alpha cardiac 1                                                                | 1 | 12.8  | 8.5   |
| AI104679 | Transcribed sequence with moderate similarity to protein ref:NP_079799.1 (M.musculu  | 3 | 57.4  | 19    |
| AI105348 | cofilin 1                                                                            | 1 | 40.4  | 21.4  |
| AI105448 | hydroxysteroid 11-beta dehydrogenase 1                                               | 1 | 33.6  | 16.4  |
| AI112237 | UI-R-Y0-mh-e-09-0-UI.s1                                                              | 2 | 75.7  | 49.5  |
| AI112391 | protein tyrosine phosphatase, non-receptor type 1                                    | 1 | 53.2  | 8.7   |
| AI112516 | zinc finger protein 36, C3H type-like 1                                              | 4 | 90.2  | 31.8  |
| AI113289 | protein tyrosine phosphatase, non-receptor type 1                                    | 3 | 55.4  | 31.9  |
| AI136891 | zinc finger protein 36, C3H type-like 1                                              | 4 | 112.6 | 35.9  |
| AI137583 | Inhibitor of DNA binding 2, dominant negative helix-loop-helix protein               | 4 | 69.6  | 36.1  |
| AI137856 | P450 (cytochrome) oxidoreductase                                                     | 4 | 102.2 | 39.6  |
| AI137862 | mitogen activated protein kinase 14                                                  | 1 | 144.6 | 58.7  |



|          |                                                                                       |   |       |       |
|----------|---------------------------------------------------------------------------------------|---|-------|-------|
| AI145177 | early growth response 4                                                               | 3 | 157.8 | 112.4 |
| AI146018 | neurexin 1                                                                            | 1 | 81.4  | 25.1  |
| AI146195 | UI-R-A1-ew-e-07-0-UI.s1 Rattus norvegicus cDNA                                        | 2 | 51    | 19.5  |
| AI169265 | EST215100                                                                             | 2 | 86.5  | 35.3  |
| AI169417 | Phosphoglycerate mutase 1                                                             | 4 | 86.9  | 18.3  |
| AI170403 | proteasome (prosome, macropain) subunit, alpha type 2                                 | 4 | 58.3  | 23.6  |
| AI170613 | heat shock 10 kDa protein 1                                                           | 3 | 80.7  | 35.9  |
| AI170613 | EST216547                                                                             | 2 | 94.2  | 32.3  |
| AI170685 | DnaJ (Hsp40) homolog, subfamily A, member 2                                           | 1 | 62.5  | 18.1  |
| AI170911 | pyruvate dehydrogenase E1 alpha-like                                                  | 1 | 42.3  | 22    |
| AI171166 | suppression of tumorigenicity 13 (colon carcinoma) Hsp70-interacting protein          | 1 | 16.6  | 12.6  |
| AI171167 | EST217116                                                                             | 2 | 36.4  | 9     |
| AI171268 | Inhibitor of DNA binding 3, dominant negative helix-loop-helix protein                | 4 | 74.9  | 34.3  |
| AI171542 | Transcribed sequence with moderate similarity to protein ref:NP_004996.1 (H.sapiens)  | 1 | 60.7  | 44.1  |
| AI171630 | mitogen activated protein kinase 14                                                   | 1 | 36.1  | 21.2  |
| AI171734 | EST217716                                                                             | 2 | 84.6  | 34.6  |
| AI171844 | ATP synthase, H+ transporting, mitochondrial F1 complex, epsilon subunit              | 4 | 296.4 | 61.2  |
| AI171962 | annexin 1                                                                             | 3 | 49.8  | 10.2  |
| AI171966 | R.norvegicus mRNA for RT1.Mb                                                          | 1 | 132.5 | 65.8  |
| AI172293 | sterol-C4-methyl oxidase-like                                                         | 1 | 59.5  | 16.2  |
| AI172452 | Transcribed sequence with weak similarity to protein pir:S13099 (R.norvegicus) S1309  | 3 | 78.7  | 28    |
| AI175900 | EST 219472                                                                            | 2 | 128.8 | 47.9  |
| AI175935 | EST219508                                                                             | 2 | 76.6  | 20.8  |
| AI176021 | phosphatase and tensin homolog                                                        | 1 | 43.5  | 15.7  |
| AI176170 | FK506-binding protein 1a                                                              | 1 | 81.9  | 20.7  |
| AI176308 | Transcribed sequences                                                                 | 4 | 130.9 | 50.4  |
| AI176460 | ---                                                                                   | 3 | 46.3  | 10.4  |
| AI177054 | v-ral simian leukemia viral oncogene homolog A (ras related)                          | 4 | 149.8 | 38.4  |
| AI177096 | Transcribed sequence with strong similarity to protein sp:P36972 (R.norvegicus) APT   | 4 | 108.1 | 47.8  |
| AI177161 | NF-E2-related factor 2                                                                | 4 | 40.3  | 10.2  |
| AI177161 | NF-E2-related factor 2                                                                | 1 | 28    | 15.7  |
| AI177256 | Transcribed sequences                                                                 | 1 | 39    | 9.4   |
| AI177366 | Integrin, beta 1                                                                      | 4 | 167.4 | 36.2  |
| AI177503 | H3 histone, family 3B                                                                 | 4 | 119.2 | 23.7  |
| AI177683 | Rattus norvegicus mRNA for hnRNP protein, partial                                     | 4 | 48.5  | 18.8  |
| AI177751 | elongation factor SIII p15 subunit                                                    | 1 | 51.4  | 36.5  |
| AI177986 | eukaryotic initiation factor 5 (eIF-5)                                                | 1 | 43.4  | 4.9   |
| AI178135 | EST221798                                                                             | 2 | 50.6  | 27.5  |
| AI179399 | collagen, type V, alpha 2                                                             | 1 | 23.6  | 7     |
| AI179576 | hemoglobin beta chain complex                                                         | 1 | 47.6  | 18.5  |
| AI179613 | glutamate dehydrogenase 1                                                             | 4 | 140.7 | 34.9  |
| AI179916 | Transcribed sequence with strong similarity to protein ref:NP_057180.1 (H.sapiens) H  | 1 | 35.2  | 31.5  |
| AI180145 | protein tyrosine phosphatase, non-receptor type 1                                     | 1 | 27.6  | 12.5  |
| AI227715 | Retinoblastoma-related gene                                                           | 3 | 47.4  | 23.9  |
| AI228247 | EST224942                                                                             | 2 | 36.5  | 9.5   |
| AI228738 | FK506-binding protein 1a                                                              | 4 | 171.8 | 80.3  |
| AI229291 | EST225986                                                                             | 2 | 30    | 10.9  |
| AI229497 | Transcribed sequence with moderate similarity to protein ref:NP_004539.1 (H.sapiens)  | 3 | 32.5  | 13.5  |
| AI229620 | EST226315                                                                             | 2 | 110.6 | 31.6  |
| AI229924 | Transcribed sequence with strong similarity to protein ref:NP_080263.1 (M.musculus)   | 1 | 59.6  | 31.1  |
| AI230228 | Rattus norvegicus phosphoserine aminotransferase mRNA, complete cds                   | 1 | 23.6  | 18.8  |
| AI230247 | selenoprotein P, plasma, 1                                                            | 4 | 178.1 | 65.5  |
| AI230256 | Inhibitor of DNA binding 2, dominant negative helix-loop-helix protein                | 4 | 69.2  | 12.9  |
| AI230395 | TBP-interacting protein 120A                                                          | 1 | 14.7  | 6.9   |
| AI230572 | nuclease sensitive element binding protein 1                                          | 4 | 30.1  | 14.8  |
| AI230614 | ATPase Na+/K+ transporting beta 1 polypeptide                                         | 3 | 46.9  | 26.8  |
| AI230632 | Transcribed sequence with strong similarity to protein ref:NP_445758.1 (R.norvegicus) | 4 | 112   | 36.3  |
| AI231213 | kangai 1                                                                              | 4 | 220.7 | 40.1  |
| AI231375 | EST 228063                                                                            | 2 | 180.9 | 61.6  |
| AI231778 | EST228466                                                                             | 2 | 29.3  | 13.8  |
| AI231821 | EST228509                                                                             | 2 | 26.9  | 20.3  |
| AI232012 | EST228700                                                                             | 2 | 52.7  | 24.6  |
| AI232307 | Transcribed sequence with weak similarity to protein pir:S13099 (R.norvegicus) S1309  | 3 | 199.3 | 64.2  |
| AI232321 | Transcribed sequence with moderate similarity to protein ref:NP_057164.1 (H.sapiens)  | 3 | 38    | 21.1  |
| AI232374 | Histone H1-0                                                                          | 1 | 36.2  | 22.3  |
| AI232374 | Histone H1-0                                                                          | 1 | 33.7  | 16.8  |
| AI232477 | G protein gamma-5 subunit                                                             | 4 | 166.4 | 55.8  |
| AI233173 | expressed in non-metastatic cells 1                                                   | 3 | 61.1  | 17.6  |
| AI233216 | glutamate dehydrogenase 1                                                             | 1 | 41.6  | 12.6  |
| AI234146 | EST230834                                                                             | 2 | 45.9  | 11.9  |
| AI235358 | Transcribed sequence with strong similarity to protein pir:S29510 (R.norvegicus) S295 | 4 | 94.5  | 4.3   |
| AI235707 | dynactin 4                                                                            | 3 | 41.1  | 23.7  |
| AI235890 | Rat MHC class I RT1.C/E mRNA, 3' end                                                  | 1 | 34    | 7.3   |
| AI236284 | fatty acid Coenzyme A ligase, long chain 4                                            | 4 | 104.6 | 30.2  |
| AI237016 | H2A histone family, member Y                                                          | 3 | 101.2 | 14.1  |
| AI237378 | Transcribed sequence with strong similarity to protein ref:NP_057017.1 (H.sapiens) hy | 1 | 116.8 | 22    |
| AI237535 | EST 234097                                                                            | 2 | 141.8 | 37.4  |
| AI237592 | progesterone induced protein                                                          | 1 | 61.8  | 20.7  |
| AI237654 | upregulated by 1,25-dihydroxyvitamin D-3                                              | 3 | 34.7  | 4.9   |

|          |                                                                                        |   |       |       |
|----------|----------------------------------------------------------------------------------------|---|-------|-------|
| AI638946 | Transcribed sequences                                                                  | 1 | 15.5  | 7.7   |
| AI638950 | Transcribed sequences                                                                  | 1 | 15.1  | 15.1  |
| AI638971 | Transcribed sequences                                                                  | 1 | 25.2  | 8.9   |
| AI638984 | Transcribed sequences                                                                  | 1 | 25.4  | 25.7  |
| AI638988 | Rat mixed-tissue library Rattus norvegicus cDNA clone rx00508 3                        | 2 | 89.5  | 38.2  |
| AI638994 | Rat mixed-tissue library Rattus norvegicus cDNA clone rx01708 3                        | 2 | 27.5  | 5.4   |
| AI639008 | Transcribed sequences                                                                  | 4 | 142.8 | 46    |
| AI639017 | Transcribed sequence with weak similarity to protein ref:NP_035644.1 (M.musculus)      | 1 | 96.7  | 17.5  |
| AI639045 | Transcribed sequence with strong similarity to protein ref:NP_006442.2 (H.sapiens) pd  | 4 | 60.1  | 17.5  |
| AI639058 | Transcribed sequence with strong similarity to protein ref:NP_075371.1 (M.musculus)    | 4 | 248.4 | 114.3 |
| AI639079 | Rat mixed-tissue library Rattus norvegicus cDNA clone rx04945 3                        | 2 | 89.1  | 67.6  |
| AI639093 | Transcribed sequences                                                                  | 3 | 56.3  | 20.1  |
| AI639097 | ---                                                                                    | 3 | 218.1 | 105   |
| AI639099 | Transcribed sequences                                                                  | 1 | 10.8  | 11.1  |
| AI639103 | Rat mixed-tissue library Rattus norvegicus cDNA clone rx01964 3                        | 2 | 50.2  | 34.6  |
| AI639113 | Transcribed sequence with moderate similarity to protein pir:A57384 (H.sapiens) A573   | 3 | 43.9  | 13.7  |
| AI639149 | Transcribed sequences                                                                  | 1 | 19.9  | 9.8   |
| AI639154 | Transcribed sequence                                                                   | 3 | 75.9  | 31    |
| AI639173 | Transcribed sequences                                                                  | 1 | 34.6  | 27.7  |
| AI639176 | Rat mixed-tissue library Rattus norvegicus cDNA clone rx02641 3                        | 2 | 30.9  | 18.2  |
| AI639195 | Transcribed sequences                                                                  | 1 | 233.3 | 230.4 |
| AI639203 | Transcribed sequences                                                                  | 1 | 44.8  | 23.6  |
| AI639207 | Transcribed sequences                                                                  | 1 | 146.1 | 59.1  |
| AI639208 | Rat mixed-tissue library Rattus norvegicus cDNA clone rx00120 3                        | 2 | 22.4  | 14.6  |
| AI639218 | Rat mixed-tissue library Rattus norvegicus cDNA clone rx01880 3                        | 2 | 23.2  | 5.7   |
| AI639236 | Transcribed sequences                                                                  | 1 | 56.9  | 37.3  |
| AI639245 | ---                                                                                    | 3 | 36.2  | 13.5  |
| AI639263 | Transcribed sequences                                                                  | 1 | 23.6  | 24.6  |
| AI639265 | Rat mixed-tissue library Rattus norvegicus cDNA clone rx04959 3                        | 2 | 22.7  | 14.2  |
| AI639301 | Transcribed sequences                                                                  | 1 | 24.3  | 15.4  |
| AI639304 | Transcribed sequence                                                                   | 1 | 45.4  | 15.7  |
| AI639338 | Transcribed sequences                                                                  | 4 | 63.8  | 14.9  |
| AI639342 | Transcribed sequence with strong similarity to protein sp:P49756 (H.sapiens) YS64_H    | 1 | 37.7  | 18.5  |
| AI639347 | ---                                                                                    | 3 | 123.4 | 53    |
| AI639353 | pleiotropic regulator 1                                                                | 3 | 31.6  | 14.5  |
| AI639354 | Transcribed sequence                                                                   | 1 | 33.4  | 14    |
| AI639364 | Rat mixed-tissue library Rattus norvegicus cDNA clone rx03955 3                        | 2 | 37.8  | 15.7  |
| AI639365 | Rat mixed-tissue library Rattus norvegicus cDNA clone rx03935 3                        | 2 | 46.1  | 15.9  |
| AI639387 | Transcribed sequence with strong similarity to protein sp:P58064 (M.musculus) RT06     | 1 | 63.4  | 58.4  |
| AI639407 | Transcribed sequences                                                                  | 1 | 23.1  | 22    |
| AI639410 | Rat mixed-tissue library Rattus norvegicus cDNA clone rx04114 3                        | 2 | 26    | 15.3  |
| AI639411 | Transcribed sequence with strong similarity to protein ref:NP_055121.1 (H.sapiens) si  | 1 | 31.5  | 23.2  |
| AI639422 | Transcribed sequence with moderate similarity to protein sp:P51868 (R.norvegicus) CA   | 1 | 125.4 | 47.5  |
| AI639425 | Rat mixed-tissue library Rattus norvegicus cDNA clone rx00313 3                        | 2 | 24.2  | 15.7  |
| AI639465 | Rat mixed-tissue library Rattus norvegicus cDNA clone rx01612 3                        | 2 | 42.1  | 16.4  |
| AI639466 | Rat mixed-tissue library Rattus norvegicus cDNA clone rx01492 3                        | 2 | 27.3  | 15    |
| AI639468 | Transcribed sequences                                                                  | 1 | 41.3  | 27.2  |
| AI639471 | Transcribed sequence                                                                   | 1 | 48.4  | 25.8  |
| AI639490 | Rat mixed-tissue library Rattus norvegicus cDNA clone rx02931 3                        | 2 | 20.1  | 9.7   |
| AI639534 | Transcribed sequence with weak similarity to protein sp:Q9ESP7 (R.norvegicus) ATS4     | 4 | 114   | 26.5  |
| AJ000347 | 3(2),5-bisphosphate nucleotidase                                                       | 1 | 17.6  | 10.7  |
| AJ001641 | POU domain, class 3, transcription factor 3                                            | 1 | 23.5  | 30.1  |
| AJ001929 | reticulocalbin                                                                         | 4 | 51.6  | 23.5  |
| AJ006064 | coronin, actin-binding protein, 1B                                                     | 4 | 240.3 | 71.7  |
| AJ006064 | coronin, actin-binding protein, 1B                                                     | 3 | 69.3  | 33.2  |
| AJ006295 | myeloid/lymphoid or mixed-lineage leukemia (trithorax (Drosophila) homolog); transloc  | 1 | 4.8   | 8     |
| AJ006340 | 26S proteasome, subunit p112                                                           | 2 | 31.7  | 8.9   |
| AJ007016 | protein tyrosine phosphatase type IVA, member 2                                        | 4 | 126.4 | 55    |
| AJ007291 | fertility protein SP22                                                                 | 3 | 48    | 21.9  |
| AJ007291 | fertility protein SP22                                                                 | 1 | 26.4  | 21.9  |
| AJ007632 | ELK channel 3, partial                                                                 | 2 | 26.3  | 11.2  |
| AJ012603 | a disintegrin and metalloproteinase domain 17                                          | 3 | 42.4  | 32.9  |
| AJ012603 | TNF-alpha converting enzyme (TACE)                                                     | 2 | 68.6  | 10.4  |
| AJ012603 | a disintegrin and metalloproteinase domain 17                                          | 1 | 64.8  | 37.4  |
| AJ131902 | growth arrest specific 7                                                               | 3 | 131.5 | 23.5  |
| AJ131902 | GAS-7 protein                                                                          | 2 | 55.2  | 12.8  |
| AJ132230 | Bradykinin receptor B1                                                                 | 3 | 105.2 | 49.3  |
| AJ222813 | interleukin 18                                                                         | 4 | 73.9  | 29.2  |
| AJ223184 | immunoglobulin superfamily, member 6                                                   | 1 | 34.9  | 21    |
| AJ223355 | solute carrier family 25 (mitochondrial carrier; dicarboxylate transporter), member 10 | 4 | 145.9 | 38.9  |
| AJ223355 | solute carrier family 25 (mitochondrial carrier; dicarboxylate transporter), member 10 | 1 | 24.3  | 20.4  |
| D00189   | ATPase, Na+K+ transporting, alpha 3 subunit                                            | 1 | 87.9  | 42.7  |
| D00403   | D00403 RATIL1A Rat interleukin-1 alpha mRNA, complete cds                              | 2 | 99.5  | 23.6  |
| D00403   | Interleukin 1 alpha                                                                    | 1 | 79.1  | 24    |
| D00913   | intercellular adhesion molecule 1                                                      | 3 | 96    | 48.6  |
| D10233   | renin-binding protein                                                                  | 2 | 63.1  | 30.1  |
| D10587   | 85kDa sialoglycoprotein (LGP85), complete cds                                          | 2 | 39.4  | 22.9  |
| D10655   | dihydrolipoamide acetyltransferase                                                     | 4 | 272.4 | 48    |
| D10754   | proteasome (prosome, macropain) subunit, beta type 6                                   | 1 | 28.6  | 17.3  |

|        |                                                                                        |   |        |       |
|--------|----------------------------------------------------------------------------------------|---|--------|-------|
| D10756 | proteasome subunit R-ZETA, complete cds                                                | 2 | 39.9   | 15.7  |
| D10952 | cytochrome c oxidase subunit Vb                                                        | 4 | 87.9   | 31.9  |
| D12770 | solute carrier family 25 (mitochondrial adenine nucleotide translocator) member 4      | 4 | 99.5   | 30.9  |
| D13120 | ATP synthase subunit d                                                                 | 4 | 63.9   | 32.7  |
| D13122 | ATPase inhibitor                                                                       | 4 | 160.7  | 84.1  |
| D13123 | ATP synthase, H+ transporting, mitochondrial F0 complex, subunit c, isoform 1          | 4 | 145.6  | 65.4  |
| D13124 | ATP synthase subunit c, complete cds                                                   | 2 | 243.4  | 30.7  |
| D13127 | ATP synthase, H+ transporting, mitochondrial F1 complex, O subunit (oligomycin sens    | 1 | 328.2  | 65.7  |
| D13309 | nuclease sensitive element binding protein 1                                           | 3 | 98.9   | 30.2  |
| D13623 | p34 protein                                                                            | 4 | 99.5   | 24.1  |
| D13623 | p34 protein                                                                            | 1 | 45.9   | 31.7  |
| D14014 | cyclin D1                                                                              | 1 | 82.4   | 36.2  |
| D14014 | cyclin D1                                                                              | 1 | 79.8   | 28.4  |
| D14015 | cyclin E                                                                               | 2 | 174.2  | 28.5  |
| D14048 | system N1 Na+ and H+-coupled glutamine transporter                                     | 4 | 46.6   | 10.2  |
| D14048 | system N1 Na+ and H+-coupled glutamine transporter                                     | 1 | 47.9   | 28.8  |
| D14418 | protein phosphatase 2 (formerly 2A), regulatory subunit A (PR 65), alpha isoform       | 4 | 148.8  | 30.9  |
| D14425 | protein phosphatase 3, regulatory subunit B, alpha isoform, type 1                     | 1 | 45.3   | 16.7  |
| D16302 | N-acetylglucosaminyltransferase I                                                      | 2 | 61.7   | 26.7  |
| D17296 | ubiquitin C                                                                            | 4 | 275.1  | 96.6  |
| D17349 | cytochrome P450 2B15                                                                   | 1 | 83.6   | 18    |
| D17614 | Tyrosine 3-monooxygenase/tryptophan 5-monooxygenase activation protein, theta pol      | 1 | 31.1   | 22    |
| D17711 | heterogeneous nuclear ribonucleoprotein K                                              | 4 | 72.6   | 21.5  |
| D21799 | proteasome (prosome, macropain) subunit, beta type 2                                   | 3 | 89.4   | 28.2  |
| D21799 | proteasome (prosome, macropain) subunit, beta type 2                                   | 1 | 46.3   | 16    |
| D21800 | proteasome subunit RC10-II                                                             | 2 | 80.4   | 44.1  |
| D21800 | proteasome (prosome, macropain) subunit, beta type 3                                   | 1 | 108    | 22    |
| D25224 | laminin receptor 1 (67kD, ribosomal protein SA)                                        | 4 | 514.5  | 150.8 |
| D26154 | Rho interacting protein 3                                                              | 3 | 48.2   | 23.2  |
| D26393 | type II hexokinase                                                                     | 1 | 23.3   | 21.9  |
| D26439 | CD1 antigen                                                                            | 2 | 60.2   | 13.2  |
| D26564 | cell division cycle 37 homolog (S. cerevisiae)                                         | 4 | 176.3  | 38.1  |
| D28773 | Thromboxane synthase 1                                                                 | 1 | 25.2   | 23.7  |
| D30666 | fatty acid Coenzyme A ligase, long chain 3                                             | 3 | 48.9   | 14.6  |
| D30739 | tyrosine 3-monooxygenase/tryptophan 5-monooxygenase activation protein, epsilon po     | 4 | 63.7   | 32.3  |
| D30740 | Tyrosine 3-monooxygenase/tryptophan 5-monooxygenase activation protein, zeta poly      | 4 | 124.1  | 43.9  |
| D30740 | 14-3-3 protein mRNA for mitochondrial import stimulation factor (MSF) S1 subunit, con  | 2 | 80.9   | 22.7  |
| D31873 | LIMK-1                                                                                 | 2 | 117.8  | 36.1  |
| D37920 | squalene epoxidase                                                                     | 1 | 31     | 27.3  |
| D37934 | 5E5 antigen                                                                            | 1 | 28.9   | 17.6  |
| D38261 | B-regulatory subunit of protein phosphatase 2A                                         | 2 | 44.6   | 8.7   |
| D38380 | transferrin                                                                            | 2 | 251.5  | 193.6 |
| D38455 | mast cell protease 6                                                                   | 3 | 124.3  | 31.3  |
| D38560 | cyclinG-associated kinase                                                              | 2 | 51.9   | 26.5  |
| D42137 | annexin V                                                                              | 4 | 200    | 50.1  |
| D44495 | apurinic/aprimidinic endonuclease 1                                                    | 1 | 40.1   | 36.8  |
| D45187 | cathepsin E                                                                            | 2 | 54.3   | 12.3  |
| D45247 | proteasome subunit RCX                                                                 | 2 | 138.1  | 28.5  |
| D45249 | protease (prosome, macropain) 28 subunit, alpha                                        | 3 | 1527.2 | 217.7 |
| D45250 | protease (prosome, macropain) 28 subunit, beta                                         | 1 | 57.9   | 6.2   |
| D45254 | cellular nucleic acid binding protein                                                  | 2 | 52.9   | 26.6  |
| D45412 | protein tyrosine phosphatase, receptor type, O                                         | 1 | 24.9   | 13    |
| D49434 | arylsulfatase B                                                                        | 2 | 74.7   | 16.2  |
| D49847 | Ash-s, complete cds                                                                    | 2 | 29.5   | 6.4   |
| D50436 | ferredoxin 1                                                                           | 1 | 22.9   | 15.7  |
| D50558 | membrane glycoprotein                                                                  | 2 | 31.3   | 11.5  |
| D50694 | Proteasome (prosome, macropain) 26S subunit, ATPase                                    | 1 | 20.8   | 18.2  |
| D50695 | proteasome (prosome, macropain) 26S subunit, ATPase, 4                                 | 1 | 18.1   | 12    |
| D50696 | liver mRNA for proteasomal ATPase (S4)                                                 | 2 | 44.4   | 22.3  |
| D63411 | outer mitochondrial membrane receptor rTOM20                                           | 3 | 44.8   | 13.1  |
| D63665 | pyrimidinergic receptor P2Y, G-protein coupled, 6                                      | 4 | 113.2  | 42.1  |
| D63761 | adrenodoxin reductase                                                                  | 2 | 55.7   | 21.9  |
| D78018 | nuclear factor I/A                                                                     | 1 | 31.5   | 10.9  |
| D78308 | calreticulin                                                                           | 2 | 120.9  | 36.9  |
| D78588 | diacylglycerol kinase zeta                                                             | 3 | 58.3   | 10.7  |
| D82071 | prostaglandin D2 synthase 2                                                            | 4 | 213    | 31.8  |
| D82363 | presenilin 1                                                                           | 1 | 42.9   | 12.6  |
| D82928 | CDP-diacylglycerol--inositol 3-phosphatidyltransferase (phosphatidylinositol synthase) | 1 | 61.6   | 39.8  |
| D83796 | UDP glycosyltransferase 1 family, polypeptide A6                                       | 4 | 240.6  | 82.1  |
| D84418 | high mobility group box 2                                                              | 1 | 10.8   | 11.6  |
| D84477 | plysia ras-related homolog A2                                                          | 3 | 48.8   | 27.4  |
| D84479 | Rat PMSG-induced ovarian mRNA, 3'sequence, N1                                          | 1 | 29.3   | 15.6  |
| D84480 | ribosomal protein L30                                                                  | 3 | 65.5   | 11.1  |
| D85035 | dihydropyrimidine dehydrogenase                                                        | 1 | 41     | 36.1  |
| D85183 | protein tyrosine phosphatase, non-receptor type substrate 1                            | 4 | 201.6  | 45.3  |
| D85189 | fatty acid Coenzyme A ligase, long chain 4                                             | 3 | 38.6   | 21.6  |
| D85760 | guanine nucleotide binding protein, alpha 12                                           | 1 | 63.3   | 23.4  |
| D86215 | NADH dehydrogenase (ubiquinone) 1 alpha subcomplex 5                                   | 4 | 64.3   | 38.3  |
| D86373 | acyl-coenzyme A:cholesterol acyltransferase                                            | 1 | 49     | 14.4  |

|        |                                                                                       |   |       |        |
|--------|---------------------------------------------------------------------------------------|---|-------|--------|
| D86641 | FK506-binding protein 1a                                                              | 4 | 178.8 | 32     |
| D87336 | bleomycin hydrolase                                                                   | 1 | 55.8  | 6.7    |
| D87991 | UDP-galactose transporter related isozyme 1                                           | 1 | 67.6  | 26.2   |
| D88364 | phosphatidylinositol glycan, class L                                                  | 1 | 66.6  | 36.1   |
| D89340 | dipeptidylpeptidase III                                                               | 1 | 61    | 16.1   |
| D89514 | 5-aminoimidazole-4-carboxamide ribonucleotide formyltransferase/IMP                   | 1 | 55.2  | 28.1   |
| D89655 | scavenger receptor class B                                                            | 2 | 94.9  | 25.5   |
| D90035 | calcineurin A alpha                                                                   | 2 | 59.9  | 16.1   |
| D90211 | Lysosomal-associated membrane protein 2                                               | 4 | 126.6 | 45.7   |
| D90258 | proteasome (prosome, macropain) subunit, alpha type 3                                 | 4 | 78.7  | 41.3   |
| D90265 | proteasome (prosome, macropain) subunit, alpha type 1                                 | 3 | 29.6  | 17.2   |
| D90401 | afadin                                                                                | 1 | 48.7  | 24.2   |
| D90401 | afadin                                                                                | 1 | 43.4  | 21.9   |
| E00444 | gamma-interferon                                                                      | 1 | 34.1  | 17.9   |
| E00717 | cytochrome P-450 from Rat Liver                                                       | 2 | 52    | 31.6   |
| E00898 | ---                                                                                   | 3 | 36.6  | 12.3   |
| E01789 | protein kinase C, beta 1                                                              | 4 | 59.9  | 19.7   |
| E01884 | Interleukin 1 beta                                                                    | 4 | 202.2 | 37.4   |
| E03358 | polyfunctional protease component C3                                                  | 4 | 48.2  | 23.5   |
| E03358 | proteasome (prosome, macropain) subunit, alpha type 2                                 | 3 | 43.1  | 31.5   |
| E03859 | guanosine-3-phosphate binding protein                                                 | 4 | 91.5  | 36.7   |
| E05646 | phosphatidylethanolamine binding protein                                              | 1 | 93.5  | 13.2   |
| E06822 | alpha-HSD(20 alpha-hydroxysteroid dehydrogenase)                                      | 1 | 31.9  | 24.1   |
| E07296 | N-acetylglucosaminyltransferase I                                                     | 1 | 42.5  | 13.3   |
| E12159 | 130kDa-Ins(1,4,5)P3 binding protein                                                   | 1 | 37.7  | 5.7    |
| E12286 | GM2 ganglioside activator protein                                                     | 1 | 64.4  | 47.2   |
| H31217 | Transcribed sequence                                                                  | 4 | 114.6 | 47     |
| H31367 | Transcribed sequences                                                                 | 1 | 58.1  | 14.3   |
| H31418 | Transcribed sequences                                                                 | 1 | 34.7  | 22.4   |
| H31420 | Transcribed sequence with weak similarity to protein ref:NP_060408.1 (H.sapiens) hy   | 1 | 339.2 | 171.6  |
| H31695 | Transcribed sequences                                                                 | 1 | 21.2  | 16.6   |
| H31732 | EST106081                                                                             | 2 | 29.2  | 8.4    |
| H31847 | dynein, cytoplasmic, light intermediate chain 1                                       | 1 | 51.3  | 12.6   |
| H32189 | EST107045                                                                             | 2 | 60.1  | 52.4   |
| H32977 | EST108553                                                                             | 2 | 36.5  | 14.8   |
| H33101 | Transcribed sequence with moderate similarity to protein ref:NP_219480.1 (H.sapiens)  | 1 | 54    | 15.4   |
| H33120 | Transcribed sequence with strong similarity to protein ref:NP_079566.1 (M.musculus)   | 1 | 31.3  | 6.6    |
| H33149 | Transcribed sequence with weak similarity to protein ref:NP_081632.1 (M.musculus)     | 1 | 16.2  | 14.7   |
| H33219 | Transcribed sequence with moderate similarity to protein ref:NP_060127.1 (H.sapiens)  | 1 | 19.5  | 9      |
| H33491 | EST109547                                                                             | 2 | 36.1  | 19.3   |
| H33629 | Transcribed sequence with strong similarity to protein ref:NP_060779.1 (H.sapiens) hy | 1 | 65.4  | 27.9   |
| H33651 | EST109846                                                                             | 2 | 33.9  | 15.2   |
| J02612 | UDP glycosyltransferase 1 family, polypeptide A6                                      | 4 | 82.8  | 18.7   |
| J02646 | eukaryotic translation initiation factor 2, subunit 1 (alpha )                        | 1 | 41.6  | 26     |
| J02679 | NAD(P)H-menadione oxidoreductase                                                      | 2 | 55.8  | 47.6   |
| J02722 | Heme oxygenase                                                                        | 4 | 129.3 | 29     |
| J02749 | acetyl-Coenzyme A acyltransferase 1 (peroxisomal 3-oxoacyl-Coenzyme A thiolase)       | 1 | 49.7  | 11     |
| J02844 | carnitine O-octanoyltransferase                                                       | 4 | 53.5  | 11.7   |
| J02869 | cytochrome P450CMF1b                                                                  | 1 | 33.4  | 22.6   |
| J02998 | ras-related protein                                                                   | 1 | 33.7  | 13.2   |
| J03572 | alkaline phosphatase, tissue-nonspecific                                              | 1 | 3803  | 1122.7 |
| J03583 | clathrin, heavy polypeptide (Hc)                                                      | 4 | 145.2 | 31.6   |
| J03621 | mitochondrial succinyl-CoA synthetase alpha subunit (cytoplasmic precursor)           | 2 | 64    | 28.2   |
| J03627 | S100 calcium binding protein A10 (calpactin)                                          | 1 | 18    | 10.5   |
| J03752 | microsomal glutathione S-transferase 1                                                | 1 | 76.6  | 27.7   |
| J03886 | myosin light chain kinase 2, skeletal muscle                                          | 4 | 147.2 | 20.2   |
| J03914 | glutathione S-transferase Yb                                                          | 2 | 43.2  | 28.6   |
| J04423 | ---                                                                                   | 4 | 135.9 | 41.2   |
| J04423 | ---                                                                                   | 3 | 64.7  | 26.8   |
| J04423 | biotin synthetase                                                                     | 2 | 67.4  | 15.1   |
| J04423 | bioC protein                                                                          | 2 | 66.6  | 12.5   |
| J04423 | ---                                                                                   | 1 | 51.1  | 19.6   |
| J04423 | ---                                                                                   | 1 | 32.5  | 21.2   |
| J04473 | fumarate hydratase 1                                                                  | 3 | 140   | 54.2   |
| J04503 | Protein phosphatase type 1A (formely 2C), Mg-dependent, alpha isoform                 | 1 | 25.9  | 12.8   |
| J04733 | N-acylaminoacyl-peptide hydrolase                                                     | 4 | 72.7  | 11.5   |
| J04793 | Band 3 mRNA encoding kidney band 3 Cl-/HW-3- anion exchanger                          | 2 | 45.5  | 21.5   |
| J04943 | nucleophosmin 1                                                                       | 4 | 122.6 | 38.1   |
| J05029 | acetyl-Coenzyme A dehydrogenase, long-chain                                           | 1 | 36.1  | 35.4   |
| J05132 | UDP glycosyltransferase 1 family, polypeptide A6                                      | 4 | 300.8 | 101.9  |
| J05210 | ATP citrate lyase                                                                     | 3 | 188.5 | 34     |
| J05232 | cholinergic receptor, nicotinic, beta polypeptide 4                                   | 1 | 23.9  | 13.1   |
| J05425 | cytochrome c oxidase, subunit 4a                                                      | 4 | 410   | 169.4  |
| K00750 | cytochrome c nuclear-encoded mitochondrial gene                                       | 4 | 40.4  | 9.3    |
| K00750 | cytochrome c nuclear-encoded mitochondrial gene                                       | 1 | 55.2  | 6      |
| K01932 | liver glutathione S-transferase Yc subunit                                            | 2 | 48.3  | 15.8   |
| L00686 | Rat carcinoembryonic antigen-related protein mRNA                                     | 1 | 37.5  | 23.8   |
| L00981 | lymphotoxin (TNF-beta) gene                                                           | 2 | 97    | 15.8   |
| L01793 | glycogenin mRNA sequence                                                              | 2 | 51.8  | 17.6   |

|        |                                                                                       |   |       |       |
|--------|---------------------------------------------------------------------------------------|---|-------|-------|
| L02529 | Transcribed sequences                                                                 | 1 | 35.4  | 35.4  |
| L02896 | glypican 1                                                                            | 1 | 54    | 20.9  |
| L03294 | Lipoprotein lipase                                                                    | 4 | 203.9 | 108.9 |
| L03294 | Lipoprotein lipase                                                                    | 4 | 173.9 | 56.8  |
| L04485 | MAP kinase kinase                                                                     | 2 | 77.8  | 38.3  |
| L07114 | Apolipoprotein B editing protein                                                      | 4 | 242.1 | 43    |
| L07380 | growth hormone-releasing factor receptor                                              | 1 | 38.8  | 11    |
| L07578 | casein kinase 1, delta                                                                | 1 | 92.5  | 53    |
| L07925 | ral guanine nucleotide dissociation stimulator                                        | 3 | 99.4  | 26.1  |
| L07925 | ral guanine nucleotide dissociation stimulator                                        | 1 | 201.1 | 79.2  |
| L08491 | GABA-A receptor alpha-2 subunit                                                       | 2 | 43.6  | 22.2  |
| L08495 | gamma-aminobutyric acid A receptor, alpha 6                                           | 1 | 35.2  | 28.9  |
| L09120 | calpain 2                                                                             | 1 | 47.2  | 25.5  |
| L10152 | solute carrier family 7, member 1                                                     | 1 | 28.2  | 8.9   |
| L10652 | methionine aminopeptidase 2                                                           | 3 | 186.1 | 35.2  |
| L10652 | eukaryotic initiation factor (Eif-2) 67 kDa associated protein                        | 2 | 65.7  | 22.1  |
| L11002 | ankyrin binding glycoprotein-1 related mRNA                                           | 2 | 46    | 14.2  |
| L11007 | cyclin-dependent kinase 4                                                             | 3 | 83.9  | 29.6  |
| L11319 | signal peptidase complex 18kD                                                         | 4 | 82.8  | 20.7  |
| L11587 | protein tyrosine phosphatase, receptor type, D                                        | 1 | 24.9  | 15.8  |
| L11930 | cyclase-associated protein homologue                                                  | 1 | 37.9  | 19.4  |
| L12380 | ADP-ribosylation factor 1                                                             | 4 | 139.7 | 41    |
| L12384 | ADP-ribosylation factor 5                                                             | 3 | 102.1 | 23.9  |
| L13202 | forkhead box D3                                                                       | 1 | 57.1  | 19.4  |
| L13635 | splicing factor, arginine/serine-rich 5                                               | 1 | 27.8  | 16.3  |
| L14323 | Phospholipase C-beta1                                                                 | 1 | 23.7  | 5.2   |
| L14462 | R-esp1 mRNA, complete cds                                                             | 2 | 77    | 20    |
| L14782 | lyn protein non-receptor kinase                                                       | 1 | 79.2  | 23.2  |
| L15354 | phosducin-like protein                                                                | 1 | 12.8  | 7.5   |
| L15619 | casein kinase II beta subunit                                                         | 3 | 26.8  | 9     |
| L17077 | NGF-binding Ig rearranged H-chain mRNA, V-region, partial cds                         | 2 | 105.4 | 34.1  |
| L17127 | proteasome (prosome, macropain) subunit, beta type 4                                  | 4 | 128.9 | 83.2  |
| L17127 | proteasome RN3 subunit                                                                | 2 | 532.2 | 234.3 |
| L18889 | calnexin mRNA, complete cds                                                           | 2 | 49.9  | 30.7  |
| L19698 | v-ral simian leukemia viral oncogene homolog A (ras related)                          | 4 | 67.6  | 8.3   |
| L19699 | v-ral simian leukemia viral oncogene homolog B                                        | 3 | 43.1  | 20.8  |
| L22655 | Rat Ig active kappa-chain mRNA VJC-region from immunocytoma IR2                       | 1 | 18.5  | 11.9  |
| L23148 | Inhibitor of DNA binding 1, helix-loop-helix protein (splice variation)               | 1 | 61.7  | 14.5  |
| L24207 | cytochrome P450, subfamily 3A, polypeptide 3                                          | 3 | 228.3 | 121.6 |
| L24776 | tropomyosin non-muscle isoform NM3 (TPM-gamma)                                        | 2 | 31.8  | 9.8   |
| L24896 | glutathione peroxidase 4                                                              | 4 | 134.7 | 43.4  |
| L25387 | phosphofructokinase C (PFK-C)                                                         | 1 | 29.6  | 16.4  |
| L26110 | transforming growth factor, beta receptor 1                                           | 1 | 34.8  | 27.4  |
| L26267 | nuclear factor kappa B p105 subunit                                                   | 1 | 76.4  | 35.5  |
| L26268 | B-cell translocation gene 1                                                           | 4 | 101.7 | 20.3  |
| L26268 | B-cell translocation gene 1                                                           | 4 | 83.8  | 16    |
| L26292 | Kruppel-like factor 4 (gut)                                                           | 1 | 31.2  | 12.5  |
| L27487 | calcitonin receptor-like receptor                                                     | 2 | 53.2  | 22.2  |
| L27843 | protein tyrosine phosphatase 4a1                                                      | 4 | 150.5 | 67.8  |
| L29281 | Protein kinase, interferon-inducible double stranded RNA dependent                    | 1 | 13.4  | 11    |
| L29573 | NaCl-dependent norepinephrine transporter mRNA, partial cds                           | 2 | 29.8  | 15.6  |
| L32591 | growth arrest and DNA-damage-inducible 45 alpha                                       | 3 | 51.6  | 12.4  |
| L34262 | palmitoyl-protein thioesterase                                                        | 3 | 70.7  | 38    |
| L35271 | Runt related transcription factor 1                                                   | 1 | 46.4  | 23.7  |
| L35558 | solute carrier family 1, member 1                                                     | 3 | 55.5  | 39.2  |
| L36532 | complement receptor related protein                                                   | 4 | 77.4  | 25.7  |
| L36664 | angiotensin 1 converting enzyme 1                                                     | 4 | 56.7  | 22.3  |
| L37966 | Rat T-cell receptor active alpha-chain C-region mRNA, partial cds, clone TRA29        | 1 | 11.8  | 8.4   |
| L37971 | T-cell receptor alpha-chain                                                           | 1 | 40    | 18    |
| L40362 | RT1 class Ib gene                                                                     | 4 | 233.9 | 45.3  |
| L40364 | MHC class I RT1.O type                                                                | 4 | 132.4 | 54.5  |
| L42855 | transcription elongation factor B (SIII) polypeptide 2 (18kD, elongin B)              | 3 | 84.4  | 66.2  |
| L46593 | small proline-rich protein (spr) gene                                                 | 1 | 144.3 | 56.7  |
| L46816 | transcription elongation factor B (SIII), polypeptide 3                               | 1 | 26.3  | 16.4  |
| L48209 | liver cytochrome c oxidase subunit VIII (COX-VIII) mRNA, 3 end of cds                 | 2 | 237.6 | 65.1  |
| M10072 | Protein tyrosine phosphatase, receptor-type, c polypeptide (antigen Cd45, leukocyte-c | 3 | 34.6  | 10.5  |
| M10094 | RT1 class Ib gene                                                                     | 1 | 38    | 10.9  |
| M11670 | liver catalase                                                                        | 2 | 25    | 10.3  |
| M12156 | heterogeneous nuclear ribonucleoprotein A1                                            | 4 | 65.9  | 28    |
| M13100 | ---                                                                                   | 4 | 91.5  | 53.5  |
| M13100 | ---                                                                                   | 4 | 53.8  | 20.3  |
| M13100 | ---                                                                                   | 4 | 38.7  | 14.8  |
| M13100 | long interspersed repetitive DNA sequence LINE3 (L1Rn)                                | 2 | 45.3  | 16.1  |
| M13962 | Glucuronidase, beta                                                                   | 1 | 48.3  | 15.1  |
| M15185 | S-adenosylhomocysteine hydrolase                                                      | 1 | 42.9  | 16.2  |
| M15428 | c-raf oncogene                                                                        | 2 | 181.6 | 10.4  |
| M16112 | calcium/calmodulin-dependent protein kinase II beta subunit                           | 1 | 35.2  | 13.8  |
| M17069 | Calmodulin 2 (phosphorylase kinase, delta)                                            | 3 | 122.2 | 34.8  |
| M18330 | protein kinase C, delta                                                               | 3 | 74.2  | 17.4  |

|        |                                                                                                 |   |       |       |
|--------|-------------------------------------------------------------------------------------------------|---|-------|-------|
| M18467 | glutamate oxaloacetate transaminase 2                                                           | 4 | 99.1  | 26    |
| M18853 | Rat T-cell receptor active alpha-chain C-region mRNA, partial cds, clone TRA29                  | 1 | 28.3  | 12.6  |
| M19359 | gamma-crystallin gene cluster                                                                   | 2 | 108.8 | 47.8  |
| M19533 | Peptidylprolyl isomerase A (cyclophilin A)                                                      | 4 | 111.6 | 51.1  |
| M21060 | superoxide dismutase 1                                                                          | 4 | 129.6 | 37.2  |
| M21354 | collagen, type III, alpha 1                                                                     | 3 | 38.6  | 13.2  |
| M21476 | Protein disulfide isomerase (Prolyl 4-hydroxylase, beta polypeptide)                            | 3 | 49.4  | 24.1  |
| M22357 | Myelin-associated glycoprotein                                                                  | 3 | 68.1  | 20.7  |
| M22756 | mitochondrial NADH dehydrogenase mRNA                                                           | 2 | 96.1  | 54.7  |
| M22993 | alpha-1 inhibitor III (alpha-1-I3)                                                              | 1 | 24    | 17.4  |
| M24324 | RT1 class Ib gene                                                                               | 4 | 609.1 | 88.2  |
| M24542 | Rieske iron-sulfur protein                                                                      | 3 | 76.2  | 31.5  |
| M24542 | Rieske iron-sulfur protein mRNA, complete cds                                                   | 2 | 107.4 | 19.1  |
| M24604 | Proliferating cell nuclear antigen                                                              | 4 | 123.7 | 66.2  |
| M25584 | insulin 1                                                                                       | 4 | 223.7 | 136.6 |
| M25646 | vasopressin                                                                                     | 2 | 85.9  | 47.5  |
| M27207 | collagen, type 1, alpha 1                                                                       | 4 | 49.7  | 11    |
| M27886 | bifunctional enzyme 6-phosphofructo-2-kinase/fructose 2,6-bisphosphatase                        | 1 | 22.4  | 5     |
| M30581 | ATPase, Ca++ transporting, ubiquitous                                                           | 1 | 35.7  | 14.3  |
| M31018 | RT1 class Ib gene                                                                               | 4 | 382.4 | 73.2  |
| M31032 | glutamine/glutamic acid-rich protein GRP-Ca                                                     | 1 | 27.4  | 24.8  |
| M31322 | sperm membrane protein (YWK-II)                                                                 | 1 | 66.6  | 32.5  |
| M33962 | protein-tyrosine-phosphatase                                                                    | 2 | 219.6 | 56.6  |
| M34238 | nuclear transcription factor-Y alpha                                                            | 1 | 34.8  | 17.5  |
| M35270 | serine pyruvate aminotransferase                                                                | 2 | 327.4 | 209.6 |
| M35300 | pancreatic secretory trypsin inhibitor-like protein                                             | 2 | 45.7  | 50.3  |
| M35601 | Fibrinogen, A alpha polypeptide                                                                 | 1 | 48.9  | 32.1  |
| M35601 | Fibrinogen, A alpha polypeptide                                                                 | 1 | 13.6  | 11.5  |
| M35602 | Fibrinogen, B beta polypeptide                                                                  | 1 | 12.4  | 4.8   |
| M35826 | mitochondrial NADH-dehydrogenase                                                                | 4 | 430.1 | 111.5 |
| M36453 | inhibin alpha-subunit                                                                           | 2 | 73.8  | 28.5  |
| M37584 | H2A histone family, member Z                                                                    | 3 | 51.1  | 13.3  |
| M55015 | Nucleolin                                                                                       | 4 | 56.3  | 19.2  |
| M55534 | crystallin, alpha B                                                                             | 1 | 13.7  | 9.3   |
| M57276 | CD53 antigen                                                                                    | 4 | 205.3 | 58.6  |
| M57428 | S6 kinase                                                                                       | 1 | 29.1  | 22.3  |
| M57664 | creatine kinase, brain                                                                          | 3 | 77.9  | 11.7  |
| M57664 | creatine kinase, brain                                                                          | 1 | 444.4 | 118.4 |
| M57728 | Rat general mitochondrial matrix processing protease (MPP) mRNA, 3' end                         | 1 | 24.7  | 14.8  |
| M58040 | transferin receptor                                                                             | 1 | 34.8  | 31.4  |
| M58340 | S6 kinase                                                                                       | 1 | 10.3  | 8.9   |
| M58758 | ATPase, H+ transporting, lysosomal noncatalytic accessory protein 1a                            | 1 | 77.3  | 20.8  |
| M59936 | connexin-31 (Cx31) gene, complete cds                                                           | 2 | 30.2  | 6.7   |
| M60322 | Aldehyde reductase 1 (low Km aldose reductase) (5.8 kb PstI fragment, probably the full length) | 1 | 206.4 | 41.9  |
| M60753 | catechol-O-methyltransferase                                                                    | 2 | 58.5  | 42.8  |
| M61875 | CD44 antigen                                                                                    | 1 | 57.9  | 29.5  |
| M62992 | glycoprotein p62 gene                                                                           | 2 | 55.7  | 17.7  |
| M62992 | nuclear pore glycoprotein 62                                                                    | 1 | 62.7  | 33.6  |
| M63282 | Activating transcription factor 3                                                               | 4 | 49.7  | 22.6  |
| M63485 | matrin 3                                                                                        | 1 | 33.3  | 13    |
| M63983 | hypoxanthine guanine phosphoribosyl transferase                                                 | 4 | 117.5 | 67.3  |
| M64301 | mitogen-activated protein kinase 6                                                              | 3 | 66.5  | 61.9  |
| M64376 | olfactory protein                                                                               | 1 | 36.5  | 18.3  |
| M64986 | high mobility group box 1                                                                       | 4 | 73.2  | 26.5  |
| M64986 | high mobility group box 1                                                                       | 1 | 50.1  | 28    |
| M74494 | ATPase, Na+K+ transporting, alpha 1                                                             | 1 | 25.7  | 11.5  |
| M75153 | ras p21-like small GTP-binding protein (24KG)                                                   | 2 | 79.5  | 22.7  |
| M75153 | RAB11a, member RAS oncogene family                                                              | 1 | 36.3  | 13.1  |
| M75281 | cystatin S                                                                                      | 2 | 243.6 | 116.1 |
| M76704 | O-6-methylguanine-DNA methyltransferase (RMGMT) mRNA, complete cds                              | 2 | 113.4 | 83.5  |
| M76767 | fatty acid synthase                                                                             | 1 | 21.2  | 19.8  |
| M80601 | programmed cell death 2                                                                         | 1 | 32.9  | 21.9  |
| M81183 | insulin-like growth factor I gene, 3 end of exon 6                                              | 2 | 38    | 17.5  |
| M81225 | farnesyltransferase alpha subunit                                                               | 2 | 32.4  | 22.7  |
| M81639 | stannin mRNA                                                                                    | 2 | 35.6  | 16.3  |
| M82826 | leucopus neurofibromatosis protein type I                                                       | 1 | 207.9 | 94.3  |
| M82855 | cytochrome P450IIC13                                                                            | 1 | 33.8  | 22.6  |
| M83298 | protein phosphatase 2 (formerly 2A), regulatory subunit B (PR 52), alpha isoform                | 1 | 84.2  | 17    |
| M83678 | RAB13                                                                                           | 4 | 68.8  | 16.6  |
| M83680 | GTPase Rab14                                                                                    | 3 | 40.1  | 8.8   |
| M86835 | Vasopressive intestinal peptide receptor                                                        | 1 | 17.6  | 9.2   |
| M87854 | adrenergic receptor kinase, beta 1                                                              | 1 | 49.1  | 26.2  |
| M91590 | Arrestin, beta 2                                                                                | 1 | 54.8  | 28.6  |
| M91802 | Homeo box A2                                                                                    | 1 | 90.9  | 32.9  |
| M93297 | ornithine aminotransferase                                                                      | 1 | 54.2  | 14.9  |
| M93401 | methylmalonate semialdehyde dehydrogenase                                                       | 2 | 85.8  | 38.3  |
| M94555 | neuromedin                                                                                      | 1 | 54.9  | 19    |
| M95768 | di-N-acetylchitobiase                                                                           | 1 | 33    | 11.1  |
| M96601 | solute carrier family 6, member 6                                                               | 1 | 28.9  | 19    |

|        |                                                                                     |   |        |       |
|--------|-------------------------------------------------------------------------------------|---|--------|-------|
| M96630 | sec61 homologue                                                                     | 1 | 25.7   | 17.3  |
| M96853 | postsynaptic density protein (PSD-95)                                               | 2 | 71.4   | 34.8  |
| M97662 | ureidopropionase, beta                                                              | 1 | 32.1   | 18.4  |
| S42358 | solute carrier family 6 (neurotransmitter transporter, GABA), member 11             | 1 | 36.1   | 19.6  |
| S43408 | Meprin 1 alpha                                                                      | 1 | 120.4  | 56.6  |
| S45663 | synaptic glycoprotein SC2                                                           | 4 | 191.1  | 34    |
| S47609 | adenosine A2a receptor                                                              | 1 | 40.6   | 8.6   |
| S50461 | guanine nucleotide binding protein, alpha 12                                        | 4 | 39.3   | 18.9  |
| S54008 | Fibroblast growth factor receptor 1                                                 | 1 | 43.6   | 22.5  |
| S55305 | 14-3-3 protein gamma subtype, putative protein kinase C regulatory protein          | 2 | 66.7   | 27.2  |
| S55427 | peripheral myelin protein 22                                                        | 4 | 121.9  | 39.8  |
| S56937 | 3-methylcholanthrene-inducible UDP-glucuronosyltransferase                          | 2 | 46.8   | 27    |
| S57478 | annexin 1                                                                           | 3 | 33.4   | 12.7  |
| S58745 | thyrotroph embryonic factor                                                         | 2 | 57.2   | 26.6  |
| S59158 | glutamate transporter                                                               | 2 | 61.8   | 20.5  |
| S59892 | autoantigen SS-B/La                                                                 | 4 | 63.5   | 31.5  |
| S63233 | phosphoglycerate mutase type B                                                      | 4 | 322.3  | 91.9  |
| S63830 | cellubrevin, putative synaptic vesicle fusion protein                               | 2 | 74.7   | 29    |
| S68135 | solute carrier family 2, member 1                                                   | 4 | 84.8   | 47.1  |
| S68589 | Set alpha isoform                                                                   | 1 | 31.2   | 11.7  |
| S69315 | S1 GRP94/endoplasmic                                                                | 4 | 200.3  | 32.5  |
| S69316 | GRP94/endoplasmic                                                                   | 4 | 83.6   | 36.5  |
| S69874 | fatty acid binding protein 5, epidermal                                             | 4 | 99.3   | 41    |
| S70803 | ---                                                                                 | 3 | 92.7   | 39.6  |
| S73424 | macrophage migration inhibitory factor                                              | 2 | 296.5  | 60.6  |
| S74141 | Hemopoietic cell tyrosine kinase                                                    | 4 | 177.4  | 62.5  |
| S74801 | ATPase, H+/K+ transporting, alpha polypeptide                                       | 1 | 46.1   | 20.9  |
| S75435 | T-cell receptor gamma chain {clone RG4}                                             | 2 | 210.4  | 74.9  |
| S75997 | nuclear pore glycoprotein 62                                                        | 1 | 32.8   | 16    |
| S76489 | sulfotransferase, estrogen preferring                                               | 1 | 22.4   | 15.4  |
| S76511 | bax apoptosis inducer                                                               | 2 | 17.9   | 18.6  |
| S77532 | helix-loop-helix transcription factor E12                                           | 1 | 23.4   | 19.3  |
| S78217 | Protein phosphatase 1, catalytic subunit, gamma isoform 1                           | 4 | 69.6   | 31.5  |
| S78218 | Protein phosphatase 1, catalytic subunit, beta isoform                              | 4 | 54.8   | 13.6  |
| S78556 | 75 kda glucose regulated protein                                                    | 1 | 50.6   | 27.6  |
| S79214 | type X collagen alpha 1 chain                                                       | 2 | 58.6   | 29.8  |
| S79263 | colony stimulating factor 2 receptor, beta 1, low-affinity (granulocyte-macrophage) | 4 | 86.2   | 23.8  |
| S79523 | selectin, lymphocyte                                                                | 1 | 60.2   | 29.7  |
| S79676 | caspase 1                                                                           | 4 | 74.6   | 24.1  |
| S80118 | nude [rats, C57BL/6J, mRNA                                                          | 1 | 24.6   | 18    |
| S81497 | lipase A, lysosomal acid                                                            | 4 | 70.2   | 51.7  |
| S83194 | calcium/calmodulin-dependent protein kinase kinase 1, alpha                         | 1 | 21.4   | 15.9  |
| S85184 | cathepsin L proenzyme                                                               | 4 | 123.4  | 45.6  |
| S85184 | cathepsin L proenzyme                                                               | 4 | 97.9   | 58.4  |
| S87522 | leukotriene A4 hydrolase                                                            | 3 | 256.7  | 110.2 |
| U00926 | ATP synthase, H+ transporting, mitochondrial F1 complex, delta subunit              | 3 | 40.6   | 24.5  |
| U00926 | ATP synthase, H+ transporting, mitochondrial F1 complex, delta subunit              | 1 | 73.6   | 28    |
| U01145 | polymeric immunoglobulin receptor                                                   | 1 | 53.8   | 27.2  |
| U01227 | 5HT3 receptor subunit                                                               | 2 | 53.5   | 21.2  |
| U02534 | nitric oxide synthase 3                                                             | 1 | 18.9   | 11    |
| U03120 | solute carrier family 5, member 1                                                   | 3 | 82.9   | 51.1  |
| U04740 | platelet-activating factor receptor                                                 | 2 | 62.3   | 17.1  |
| U05784 | microtubule-associated proteins 1A/1B light chain 3                                 | 1 | 111.7  | 25.5  |
| U06099 | peroxiredoxin 2                                                                     | 4 | 160.8  | 64.4  |
| U06434 | small inducible cytokine A4                                                         | 3 | 55.7   | 30.6  |
| U06752 | pre-sialomucin complex (pSMC)                                                       | 2 | 41.6   | 19.3  |
| U07683 | UDP-glucuronosyltransferase 8                                                       | 1 | 19     | 19.5  |
| U07971 | glycine amidinotransferase (L-arginine:glycine amidinotransferase)                  | 1 | 26.8   | 4.6   |
| U08136 | selectin, endothelial cell, ligand                                                  | 3 | 64     | 12.5  |
| U09211 | solute carrier family 18, member 3                                                  | 3 | 80.3   | 41.8  |
| U09228 | transcription factor 4                                                              | 1 | 38.3   | 14.7  |
| U09256 | transketolase                                                                       | 3 | 81.2   | 34    |
| U09551 | HMG-box containing protein 1                                                        | 1 | 33.2   | 15.3  |
| U09583 | src related tyrosine kinase                                                         | 1 | 8.3    | 9     |
| U09870 | major vault protein                                                                 | 1 | 57.5   | 18.8  |
| U11685 | nuclear receptor subfamily 1, group H, member 3                                     | 1 | 29.6   | 18.8  |
| U11760 | valosin-containing protein                                                          | 3 | 113.6  | 34.1  |
| U13895 | Proteasome (prosome, macropain) 26S subunit, ATPase                                 | 1 | 22.4   | 15.1  |
| U14647 | caspase 1                                                                           | 1 | 34     | 20.3  |
| U14746 | von Hippel-Lindau syndrome homolog                                                  | 1 | 46.3   | 10    |
| U15211 | retinoic acid receptor alpha 2 isoform                                              | 2 | 1427.4 | 590.2 |
| U16025 | class Ib RT1                                                                        | 2 | 115.1  | 21.3  |
| U16253 | corticotrophin releasing hormone receptor 2                                         | 1 | 37     | 6.1   |
| U17035 | chemokine (C-X-C motif) ligand 10                                                   | 1 | 31.4   | 8.7   |
| U17995 | kappa opioid receptor gene                                                          | 2 | 20.5   | 23.1  |
| U19614 | lamina-associated polypeptide 1C                                                    | 1 | 69.7   | 51.9  |
| U21718 | hypothetical RNA binding protein RDA288                                             | 1 | 20.7   | 6.2   |
| U21719 | D920 intestinal epithelium proliferating cell-associated                            | 3 | 34.3   | 11.8  |
| U21871 | mitochondrial membrane receptor                                                     | 2 | 93.4   | 36    |

|        |                                                                                             |   |       |       |
|--------|---------------------------------------------------------------------------------------------|---|-------|-------|
| U22297 | casein kinase 1 gamma 2                                                                     | 2 | 33.7  | 13.2  |
| U22414 | chemokine (C-C motif) ligand 3                                                              | 4 | 201.7 | 105.3 |
| U23056 | C-CAM4 protein                                                                              | 1 | 28.7  | 17.5  |
| U24282 | type III iodothyronine deiodinase (diolI)                                                   | 2 | 52.9  | 10.4  |
| U24441 | matrix metalloproteinase 9 (gelatinase B, 92-kDa type IV collagenase)                       | 1 | 58.2  | 40.6  |
| U24489 | tenascin-X mRNA                                                                             | 2 | 51.1  | 26.2  |
| U25264 | Selenoprotein W muscle 1                                                                    | 1 | 37.3  | 13.3  |
| U27201 | tissue inhibitor of metalloproteinase 3 (TIMP-3)                                            | 2 | 56.7  | 37.8  |
| U28938 | protein tyrosine phosphatase D30                                                            | 2 | 77.6  | 36.2  |
| U31599 | R.norvegicus mRNA for RT1.Mb                                                                | 1 | 57.1  | 37.2  |
| U32575 | RSec6 protein                                                                               | 1 | 27.2  | 23.5  |
| U32681 | ebnerin                                                                                     | 2 | 220.4 | 110.3 |
| U33314 | p21 (CDKN1A)-activated kinase 3                                                             | 1 | 50.1  | 23    |
| U33472 | type 1 astrocyte and olfactory-limbic associated protein AT1-46                             | 2 | 136.3 | 31.4  |
| U34932 | Fos-related antigen                                                                         | 1 | 21.3  | 14.5  |
| U35244 | vacuolar protein sorting homolog v-ps33a                                                    | 3 | 77.6  | 30.7  |
| U36482 | endoplasmic reticulum protein 29                                                            | 3 | 91.5  | 53.9  |
| U37464 | MEK5alpha-2 (MEK5)                                                                          | 2 | 76.2  | 16.4  |
| U38376 | phospholipase A2, group IVA (cytosolic, calcium-dependent)                                  | 3 | 65.7  | 11.8  |
| U39208 | cytochrome P450 4F6                                                                         | 1 | 128.3 | 29.2  |
| U39476 | vav 1 oncogene                                                                              | 4 | 49.1  | 25    |
| U39546 | surface protein MCA-32                                                                      | 1 | 57.6  | 19.5  |
| U41164 | Cys2/His2 zinc finger protein (rKr1)                                                        | 1 | 27.1  | 14.2  |
| U41803 | mitofusin 2                                                                                 | 3 | 50.8  | 11.3  |
| U42627 | dual-specificity protein tyrosine phosphatase                                               | 2 | 57    | 15.5  |
| U42976 | neuronal nicotinic acetylcholine receptor subunit beta4                                     | 2 | 50    | 25.9  |
| U43175 | ATPase, vacuolar, 14 kD                                                                     | 4 | 187.1 | 60.6  |
| U45965 | chemokine (C-X-C motif) ligand 2                                                            | 1 | 13.9  | 15.8  |
| U47031 | purinergic receptor P2X, ligand-gated ion channel, 4                                        | 3 | 49.6  | 8.2   |
| U48828 | retroviral-like ovarian specific transcript 30-1                                            | 2 | 29.9  | 18.6  |
| U50194 | tripeptidylpeptidase II                                                                     | 1 | 40.1  | 14.5  |
| U53475 | GTPase Rab8b (Rab8b)                                                                        | 2 | 62.2  | 28    |
| U53858 | calpain 1                                                                                   | 1 | 122.4 | 17.2  |
| U53859 | calpain, small subunit 1                                                                    | 4 | 342.5 | 60.5  |
| U53859 | calpain small subunit                                                                       | 2 | 196.2 | 34.6  |
| U53922 | DnaJ-like protein                                                                           | 1 | 57.3  | 13.3  |
| U54632 | ubiquitin-conjugating enzyme UbcE2A                                                         | 2 | 67.9  | 29.5  |
| U54632 | Ubiquitin conjugating enzyme E2I                                                            | 1 | 43.2  | 11.7  |
| U55192 | inositol polyphosphate 5 phosphatase Ship (SHIP)                                            | 2 | 83.8  | 11.3  |
| U55765 | serine (or cysteine) proteinase inhibitor, clade A (alpha-1 antiproteinase, antitrypsin), m | 1 | 15    | 13.7  |
| U55815 | solute carrier family 12, member 4                                                          | 1 | 37.3  | 11.3  |
| U56242 | v-maf musculoaponeurotic fibrosarcoma (avian) oncogene homolog (c-maf)                      | 1 | 65.5  | 35    |
| U57050 | 26S proteasome, subunit p112                                                                | 1 | 113.8 | 44    |
| U57362 | procollagen, type XII, alpha 1                                                              | 1 | 16.6  | 10.8  |
| U57500 | protein tyrosine phosphatase alpha                                                          | 2 | 58.1  | 7.2   |
| U57715 | FGF receptor activating protein 1                                                           | 1 | 40.8  | 21.2  |
| U60882 | heterogeneous nuclear ribonucleoproteins methyltransferase-like 2 (S. cerevisiae)           | 1 | 25.5  | 14.3  |
| U60976 | flotillin 1                                                                                 | 3 | 56.4  | 10.5  |
| U60977 | flotillin 1                                                                                 | 1 | 899.3 | 487.9 |
| U61184 | aryl hydrocarbon receptor nuclear translocator                                              | 1 | 51.1  | 16.6  |
| U61729 | proline rich 2                                                                              | 4 | 46.3  | 15.4  |
| U62897 | carboxypeptidase D precursor                                                                | 2 | 45.4  | 18.3  |
| U62940 | GrpE-like 1, mitochondrial                                                                  | 1 | 30.3  | 11.6  |
| U63923 | thioredoxin reductase 1                                                                     | 1 | 36.8  | 14.5  |
| U64030 | Deoxyuridinetriphosphatase (dUTPase)                                                        | 1 | 28.1  | 4.7   |
| U64689 | fasciculation and elongation protein zeta 2 (zygin II)                                      | 1 | 20.1  | 9.5   |
| U64705 | protein synthesis initiation factor 4                                                       | 4 | 125.3 | 54.9  |
| U64705 | protein synthesis initiation factor 4                                                       | 3 | 113.7 | 36.4  |
| U65007 | met proto-oncogene                                                                          | 1 | 28.7  | 16    |
| U66723 | purine-selective sodium/nucleoside cotransporter                                            | 2 | 57    | 18.5  |
| U67207 | leptin receptor                                                                             | 4 | 44.7  | 9     |
| U67888 | Rattus norvegicus mast cell protease 3 (RMCP-3) mRNA, partial cds                           | 1 | 10.2  | 15.2  |
| U67910 | mast cell protease 7 (RMCP-7)                                                               | 2 | 43.4  | 26.5  |
| U68272 | interferon gamma receptor                                                                   | 3 | 54    | 6.6   |
| U68562 | heat shock protein 60 (liver)                                                               | 1 | 28.2  | 10.1  |
| U70050 | jagged 2                                                                                    | 1 | 93.4  | 28.7  |
| U70825 | 5-oxoprolinase (ATP-hydrolysing)                                                            | 1 | 31.6  | 20.1  |
| U72497 | fatty acid amide hydrolase                                                                  | 4 | 70.3  | 14.6  |
| U72660 | ninjurin 1                                                                                  | 1 | 101.7 | 40.7  |
| U73525 | thioredoxin 2                                                                               | 4 | 382.4 | 188.2 |
| U75392 | B-cell receptor-associated protein 37                                                       | 1 | 50    | 32    |
| U75400 | coatamer beta subunit mRNA, partial cds and 3 untranslated sequence                         | 2 | 29.7  | 14.5  |
| U75404 | Rattus norvegicus Ssecks 322 mRNA, 3' untranslated region, partial sequence                 | 4 | 58.2  | 23.5  |
| U75405 | collagen, type 1, alpha 1                                                                   | 4 | 60.2  | 15.3  |
| U75411 | anti-idiotypic immunoglobulin M light chain gene,                                           | 1 | 20.1  | 14.3  |
| U75917 | clathrin-associated protein 17                                                              | 4 | 148.2 | 43.5  |
| U75917 | clathrin-associated protein 17                                                              | 4 | 134.7 | 34.5  |
| U75920 | microtubule-associated protein, RP/EB family, member 1                                      | 1 | 21.4  | 11.8  |
| U75927 | cytochrome oxidase subunit VIIa mRNA, 3 untranslated region, partial sequence               | 2 | 41    | 11.5  |



|        |                                                                                   |   |       |       |
|--------|-----------------------------------------------------------------------------------|---|-------|-------|
| U75928 | Secreted acidic cystein-rich glycoprotein (osteonectin)                           | 1 | 18.3  | 13.8  |
| U75932 | cAMP-dependent protein kinase type I regulatory subunit                           | 2 | 79.4  | 18.2  |
| U76714 | solute carrier family 39 (iron-regulated transporter), member 1                   | 1 | 38.1  | 24.9  |
| U76714 | solute carrier family 39 (iron-regulated transporter), member 1                   | 1 | 25.3  | 15.1  |
| U76997 | aminopeptidase Vp165                                                              | 1 | 27.6  | 11.6  |
| U77038 | protein tyrosine phosphatase, non-receptor type 6                                 | 3 | 74.2  | 40.4  |
| U77038 | protein-tyrosine phosphatase (SHP-1)                                              | 2 | 63.9  | 23.8  |
| U77697 | platelet/endothelial cell adhesion molecule                                       | 1 | 30.5  | 21.1  |
| U77777 | interleukin 18                                                                    | 4 | 95.6  | 40.7  |
| U77829 | growth arrest specific 5                                                          | 1 | 20.6  | 9.9   |
| U77918 | proteasome (prosome, macropain) 26S subunit, ATPase 3                             | 1 | 33.8  | 23.8  |
| U81037 | ankyrin binding cell adhesion molecule NrCAM (NrCAM)                              | 2 | 41.5  | 6.4   |
| U81186 | smooth muscle-specific 17 beta-hydroxysteroid dehydrogenase type 3                | 1 | 28    | 18.7  |
| U81492 | interleukin 3                                                                     | 1 | 39.5  | 12.7  |
| U82623 | RalA binding protein 1                                                            | 1 | 17.1  | 15.1  |
| U83119 | L1 retrotransposon ORF2                                                           | 2 | 33.5  | 19.1  |
| U83880 | Rattus norvegicus glycerol-3-phosphate dehydrate dehydrogenase (mtGPDH) mRNA,     | 1 | 37.8  | 23.6  |
| U83883 | p105 coactivator mRNA                                                             | 2 | 41.5  | 20.9  |
| U84727 | 2-oxoglutarate carrier                                                            | 4 | 89.5  | 41.2  |
| U86379 | complement component 3a receptor 1                                                | 3 | 30    | 7     |
| U87306 | transmembrane receptor Unc5H2                                                     | 1 | 78    | 11.6  |
| U87627 | monocarboxylate transporter                                                       | 1 | 57.9  | 25.6  |
| U88324 | Guanine nucleotide-binding protein beta 1                                         | 4 | 43.1  | 22.6  |
| U88324 | G protein beta1 subunit (rGb1) mRNA, complete cds                                 | 2 | 104.2 | 56.3  |
| U89745 | unknown protein                                                                   | 4 | 128.2 | 36.4  |
| U90261 | SH3-domain kinase binding protein 1                                               | 1 | 79.1  | 29.6  |
| U90725 | caveolae-associated protein mRNA, complete cds                                    | 2 | 41.3  | 28.5  |
| U91679 | ETS domain transcription factor Pet-1                                             | 4 | 204.5 | 102.8 |
| U92279 | regulator of G-protein signaling 14                                               | 1 | 96.4  | 53.4  |
| U93306 | kinase insert domain protein receptor                                             | 1 | 35.6  | 61.6  |
| U93692 | preimplantation protein 2                                                         | 1 | 47.4  | 26.6  |
| U94321 | growth hormone secretagogue receptor                                              | 1 | 13.8  | 12.1  |
| U94340 | ADP-ribosyltransferase 1                                                          | 1 | 39.4  | 15.4  |
| U94708 | prostaglandin E receptor EP2 subtype                                              | 1 | 18.3  | 6.8   |
| U94904 | abl-interactor 2                                                                  | 1 | 40.3  | 14.7  |
| U95001 | diphosphoinositol polyphosphate phosphohydrolase type II                          | 1 | 89.5  | 42.5  |
| U95162 | nuclear protein E3-3                                                              | 1 | 33    | 16.4  |
| U96130 | glycogenin                                                                        | 3 | 35.8  | 8.7   |
| V01216 | Orosomucoid 1                                                                     | 1 | 32.5  | 11.2  |
| V01217 | ---                                                                               | 4 | 121.5 | 30    |
| V01217 | ---                                                                               | 3 | 153   | 63.1  |
| V01227 | alpha-tubulin                                                                     | 4 | 194.2 | 149   |
| X00722 | 32S pre-rRNA 5'-terminal part with 28S rRNA                                       | 1 | 51.8  | 12.4  |
| X02231 | Glyceraldehyde-3-phosphate dehydrogenase                                          | 4 | 51.2  | 6.6   |
| X02284 | aldolase B                                                                        | 1 | 167.8 | 77.2  |
| X02412 | tropomyosin 1, alpha                                                              | 1 | 54    | 15.9  |
| X02601 | matrix metalloproteinase 3                                                        | 1 | 26.8  | 10.2  |
| X02610 | enolase 1, alpha                                                                  | 3 | 170.8 | 48.8  |
| X02904 | glutathione S-transferase, pi 2                                                   | 4 | 118   | 50    |
| X02918 | Protein disulfide isomerase (Prolyl 4-hydroxylase, beta polypeptide)              | 4 | 282.8 | 95.4  |
| X03369 | Rat mRNA for beta-tubulin T beta15                                                | 3 | 94.9  | 32    |
| X04139 | protein kinase C, beta 1                                                          | 4 | 129.1 | 47.5  |
| X04229 | glutathione S-transferase (GST) Y(b) subunit (EC 2.5.1.18)                        | 2 | 30.5  | 14    |
| X05300 | Ribophorin I                                                                      | 1 | 53.2  | 27.3  |
| X05341 | acetyl-Coenzyme A acyltransferase 2 (mitochondrial 3-oxoacyl-Coenzyme A thiolase) | 1 | 32.6  | 21.1  |
| X05472 | ---                                                                               | 4 | 43    | 14.1  |
| X05472 | ---                                                                               | 3 | 56    | 25.8  |
| X05566 | myosin regulatory light chain                                                     | 4 | 134.2 | 44.9  |
| X05834 | Fibronectin 1                                                                     | 3 | 66.6  | 21.6  |
| X06916 | S100 calcium-binding protein A4                                                   | 3 | 76.1  | 28.8  |
| X07365 | glutathione peroxidase                                                            | 3 | 196.5 | 34.9  |
| X07467 | glucose-6-phosphate dehydrogenase                                                 | 4 | 341.7 | 113.1 |
| X07648 | amyloidogenic glycoprotein (rAG)                                                  | 2 | 50.7  | 8.4   |
| X07686 | ---                                                                               | 4 | 78.1  | 38.5  |
| X07944 | ornithine decarboxylase gene                                                      | 3 | 47.5  | 13    |
| X08056 | guanidinoacetate methyltransferase                                                | 1 | 60.4  | 25.3  |
| X12355 | glucose regulated protein, 58 kDa                                                 | 4 | 131.4 | 35.1  |
| X12367 | glutathione peroxidase I                                                          | 4 | 291.2 | 33.3  |
| X12535 | RAB7, member RAS oncogene family                                                  | 4 | 86.8  | 29.5  |
| X13016 | CD48 antigen                                                                      | 3 | 65.7  | 21.9  |
| X13411 | Eph receptor B2                                                                   | 1 | 39.9  | 17.7  |
| X13527 | fatty acid synthase                                                               | 1 | 42.1  | 6     |
| X13549 | ribosomal protein S10                                                             | 4 | 138.3 | 62    |
| X13905 | ras-related rab1B protein                                                         | 4 | 103.8 | 21.3  |
| X13905 | ras-related rab1B protein                                                         | 1 | 29.4  | 16.6  |
| X13933 | Calmodulin 1 (phosphorylase kinase, delta)                                        | 4 | 149.8 | 42.2  |
| X14265 | calmodulin 3                                                                      | 1 | 70.7  | 18    |
| X14323 | Fc receptor, IgG, alpha chain transporter                                         | 4 | 175.9 | 35.4  |
| X14323 | X14323cds RNIGGR51 Rat mRNA for IgG receptor FcRn large subunit p51               | 2 | 98.1  | 29    |

|        |                                                                                         |   |       |       |
|--------|-----------------------------------------------------------------------------------------|---|-------|-------|
| X14848 | MIRNXX Rattus norvegicus mitochondrial genome                                           | 1 | 33.2  | 22.3  |
| X15013 | ribosomal protein L7a                                                                   | 1 | 110.3 | 29.2  |
| X16043 | phosphatase 2A catalytic subunit isotype alpha                                          | 2 | 45.3  | 19    |
| X16044 | Protein phosphatase 2 (formerly 2A), catalytic subunit, beta isoform                    | 1 | 31    | 16.9  |
| X16703 | Insulin-like growth factor II (somatomedin A)                                           | 1 | 36.9  | 13.3  |
| X51615 | connexin protein Cx26                                                                   | 4 | 58.5  | 16.1  |
| X52311 | unr protein with unknown function                                                       | 2 | 70.5  | 14    |
| X52477 | Complement component 3                                                                  | 4 | 387.8 | 101.7 |
| X52498 | transforming growth factor, beta 1                                                      | 1 | 79.5  | 18.1  |
| X52711 | myxovirus (influenza virus) resistance                                                  | 1 | 59.3  | 34.8  |
| X53052 | ---                                                                                     | 3 | 56.6  | 17.1  |
| X53363 | calreticulin                                                                            | 1 | 39.6  | 19.6  |
| X53428 | glycogen synthase kinase 3 beta                                                         | 1 | 23.8  | 8.5   |
| X53504 | ribosomal protein L12                                                                   | 4 | 288.7 | 63.4  |
| X53517 | CD37 antigen                                                                            | 1 | 141.4 | 20.2  |
| X53581 | long interspersed repetitive DNA containing 7 ORF s                                     | 2 | 48.7  | 23.2  |
| X53944 | dopamine receptor D3                                                                    | 4 | 175.8 | 43.8  |
| X54510 | ATP synthase, H+ transporting, mitochondrial F0 complex, subunit F6                     | 3 | 57.7  | 35.8  |
| X54510 | ATP synthase, H+ transporting, mitochondrial F0 complex, subunit F6                     | 1 | 23.5  | 10.5  |
| X54640 | basigin                                                                                 | 1 | 54.7  | 33.8  |
| X54793 | heat shock protein 60 (liver)                                                           | 1 | 130   | 23.7  |
| X55298 | ribophorin 2                                                                            | 4 | 77    | 35.8  |
| X55660 | Proprotein convertase subtilisin/kexin type 3 (paired basic amino acid cleaving enzyme) | 4 | 95.8  | 11.3  |
| X55986 | multicatalytic proteionase (MCP) subunit L ingensin                                     | 1 | 53    | 7.1   |
| X56133 | mitochondrial H+-ATP synthase alpha subunit                                             | 4 | 112   | 58.3  |
| X56228 | thiosulfate sulfurtransferase                                                           | 1 | 54.2  | 26.5  |
| X57523 | mtp1 mRNA                                                                               | 2 | 39.7  | 15.2  |
| X57523 | mtp1 mRNA                                                                               | 2 | 26    | 18.2  |
| X57986 | C alpha subunit of the cAMP-dependent protein kinase                                    | 3 | 52.2  | 16.5  |
| X57986 | C alpha subunit of the cAMP-dependent protein kinase                                    | 1 | 126.8 | 58.6  |
| X58550 | preproacrosin                                                                           | 1 | 48.6  | 17    |
| X58631 | protein-tyrosine kinase                                                                 | 1 | 56.9  | 30.2  |
| X59267 | drebrin                                                                                 | 2 | 88.9  | 28.4  |
| X59601 | plectin                                                                                 | 2 | 86.1  | 21.8  |
| X59737 | ubiquitous mitochondrial creatine kinase                                                | 2 | 114.1 | 52.7  |
| X60769 | CCAAT/enhancer binding protein (C/EBP), beta                                            | 3 | 96.5  | 26    |
| X61296 | ORF2                                                                                    | 3 | 37.3  | 12.2  |
| X61381 | interferon induced transmembrane protein 3-like                                         | 1 | 56.9  | 11.6  |
| X62145 | ribosomal protein L8                                                                    | 4 | 122.5 | 64    |
| X62528 | ribonuclease/angiogenin inhibitor                                                       | 3 | 59.4  | 16    |
| X63594 | RRRLIF1 R.rattus RL/IF-1 mRNA                                                           | 2 | 56    | 22.3  |
| X63594 | RL/IF-1 mRNA                                                                            | 1 | 55    | 27.9  |
| X65228 | ribosomal protein L23a                                                                  | 3 | 328.1 | 104.3 |
| X66870 | lamin A                                                                                 | 3 | 95.1  | 30.7  |
| X67269 | Insulin degrading enzyme                                                                | 3 | 51.2  | 12.1  |
| X68283 | ribosomal protein L29                                                                   | 4 | 218.9 | 58.7  |
| X70062 | gamma subunit of sodium potassium ATPase                                                | 2 | 81.8  | 41.9  |
| X71127 | complement component 1, q subcomponent, beta polypeptide                                | 4 | 298.6 | 73.3  |
| X72757 | cox VIa                                                                                 | 4 | 144.1 | 78.8  |
| X72757 | cox VIa                                                                                 | 1 | 31.2  | 7.9   |
| X73371 | low affinity immunoglobulin gamma FC region receptor II precursor                       | 1 | 28.3  | 18.1  |
| X73911 | Amiloride binding protein 1                                                             | 3 | 61.6  | 15    |
| X74401 | guanosine diphosphate dissociation inhibitor 3                                          | 4 | 95.7  | 13.1  |
| X74565 | polypyrimidine tract binding protein                                                    | 1 | 49    | 20.3  |
| X75253 | phosphatidylethanolamine binding protein                                                | 3 | 103.5 | 27.4  |
| X75856 | Testis enhanced gene transcript                                                         | 4 | 480.7 | 78.5  |
| X76489 | CD9 antigen (p24)                                                                       | 3 | 46.6  | 19.7  |
| X76985 | latexin                                                                                 | 1 | 13.9  | 10.9  |
| X77117 | NADH-cytochrome b5 reductase                                                            | 1 | 199.8 | 94.1  |
| X77815 | SMR1-alpha2                                                                             | 1 | 13.5  | 14.4  |
| X78327 | ribosomal protein L13                                                                   | 3 | 118.4 | 55.7  |
| X78848 | glutathione S-transferase, alpha 1                                                      | 1 | 91    | 36.9  |
| X78949 | prolyl 4-hydroxylase alpha subunit                                                      | 3 | 59.8  | 37.5  |
| X80130 | alpha-actin cardiac protein                                                             | 1 | 72.8  | 12.5  |
| X82021 | suppression of tumorigenicity 13 (colon carcinoma) Hsp70-interacting protein            | 3 | 36.3  | 23.6  |
| X82445 | C15 mRNA                                                                                | 2 | 69.6  | 21.1  |
| X84210 | nuclear factor I/A                                                                      | 1 | 20.4  | 9.5   |
| X85183 | Ras-related GTP-binding protein ragA                                                    | 1 | 29.3  | 14.6  |
| X86086 | annexin VI                                                                              | 1 | 58.9  | 4.6   |
| X87157 | neurolysin (metallopeptidase M3 family)                                                 | 1 | 14.8  | 13.4  |
| X89225 | L-like neutral amino acid transport activity                                            | 2 | 79    | 49.4  |
| X89697 | TPCR07 protein                                                                          | 1 | 32.3  | 19    |
| X89699 | TPCR10 protein                                                                          | 1 | 51.9  | 36.4  |
| X90823 | USF2a & USF2b                                                                           | 2 | 35.5  | 17.1  |
| X92097 | coated vesicle membrane protein                                                         | 1 | 29.3  | 8.3   |
| X93591 | mismatch repair protein                                                                 | 1 | 23.9  | 13.3  |
| X94551 | laminin gamma 1                                                                         | 2 | 80.7  | 41.2  |
| X95577 | protein kinase, AMP-activated, beta 1 non-catalytic subunit                             | 1 | 16.4  | 15.6  |
| X95990 | C5a anaphylatoxin receptor                                                              | 2 | 262.6 | 60.1  |

|        |                                                                      |   |       |      |
|--------|----------------------------------------------------------------------|---|-------|------|
| X96488 | mitogen-activated protein kinase 12                                  | 1 | 58.2  | 28.9 |
| X97374 | prepronociceptin                                                     | 3 | 174.9 | 42.2 |
| X97443 | integral membrane protein Tmp21-I (p23)                              | 1 | 29.2  | 29.2 |
| X97772 | 3-phosphoglycerate dehydrogenase                                     | 1 | 53.2  | 5.3  |
| Y00311 | medium-chain S-acyl fatty acid synthetase thio ester hydrolase (MCH) | 1 | 37.8  | 21.3 |
| Y00396 | v-myc avian myelocytomatosis viral oncogene homolog                  | 1 | 57.6  | 33.9 |
| Y08355 | sequestosome 1                                                       | 1 | 128.4 | 39.4 |
| Y09453 | calcium channel gamma subunit                                        | 2 | 22.8  | 13.7 |
| Y09507 | hypoxia inducible factor 1, alpha subunit                            | 1 | 33.3  | 18   |
| Y12178 | ceruloplasmin                                                        | 1 | 38    | 24.1 |
| Y13336 | defender against cell death 1                                        | 4 | 175   | 76.7 |
| Y13714 | osteonectin                                                          | 2 | 73.1  | 29.9 |
| Y15054 | tumor specific antigen 70 kDa                                        | 1 | 85.3  | 31.9 |
| Z15123 | S-adenosylmethionine decarboxylase gene, exons 4-8                   | 2 | 30.9  | 4.1  |
| Z18877 | 25 oligoadenylate synthetase                                         | 1 | 35.1  | 6.5  |
| Z29072 | mucin                                                                | 1 | 21.6  | 15.1 |
| Z36276 | protein kinase, cGMP- dependent, type 2                              | 1 | 11.7  | 8.4  |
| Z46374 | met proto-oncogene                                                   | 1 | 20.2  | 21.5 |
| Z48444 | a disintegrin and metalloprotease domain 10                          | 1 | 24.5  | 14.7 |
| Z56277 | Chloride channel 5                                                   | 1 | 18.3  | 14.8 |
| Z71925 | polymerase (RNA) II (DNA directed) polypeptide G                     | 4 | 116.7 | 37.7 |
| Z78279 | collagen alpha1 type I                                               | 2 | 43.2  | 13.4 |
