# Supplementary material
Source: publisher figshare collection journal article supplement (https://karger.figshare.com/articles/dataset/_/5104426)
Supplement: Supplementary file 3 [file 1]

**Genes not expressed by normal microglia in vitro**

| GB code  | Title                                                                                                                                                                                                                                                                                | Mean  | Std  |
|----------|--------------------------------------------------------------------------------------------------------------------------------------------------------------------------------------------------------------------------------------------------------------------------------------|-------|------|
| A01157   | lingual lipase                                                                                                                                                                                                                                                                       | 3.4   | 2.2  |
| A03913   | serine (or cysteine) proteinase inhibitor, clade E, member 2                                                                                                                                                                                                                         | 9.9   | 4.6  |
| A04674   | uncoupling protein 1                                                                                                                                                                                                                                                                 | 17.5  | 13.7 |
| A07543   | variable coding sequence A1                                                                                                                                                                                                                                                          | 46.3  | 35.1 |
| A09811   | BRL-3A binding protein                                                                                                                                                                                                                                                               | 5.9   | 2.2  |
| A16585   | relaxin 1                                                                                                                                                                                                                                                                            | 14.7  | 12.8 |
| A17753   | dopaminergic receptor D-3                                                                                                                                                                                                                                                            | 24.5  | 15   |
| A30543   | CD44 surface protein                                                                                                                                                                                                                                                                 | 4.1   | 7    |
| A44407   | Sequence 4 from Patent EP0655442                                                                                                                                                                                                                                                     | 10.6  | 6.3  |
| AA108277 | cDNA clone pCO100 5' similar to Heat shock protein (hsp-E7I),                                                                                                                                                                                                                        | 6.9   | 4.5  |
| AA108308 | Transcribed sequence with moderate similarity to protein pir:S15349 (M.musculus) S15349 mdm2 protein - mouse                                                                                                                                                                         | 133.4 | 72.5 |
| AA108308 | Transcribed sequence with moderate similarity to protein pir:S15349 (M.musculus) S15349 mdm2 protein - mouse                                                                                                                                                                         | 0.8   | 0.1  |
| AA684537 | Transcribed sequence with moderate similarity to protein ref:NP_002483.1 (H.sapiens) NADH dehydrogenase (ubiquinone) 1 beta subcomplex, 5 (16kD, SGD) [Homo sapiens]                                                                                                                 | 35.1  | 17.1 |
| AA684631 | Transcribed sequence with weak similarity to protein ref:NP_109615.1 (M.musculus) ankycorbin; NORPEG-like protein [Mus musculus]                                                                                                                                                     | 6.3   | 8.8  |
| AA684641 | Transcribed sequences                                                                                                                                                                                                                                                                | 25.5  | 21.1 |
| AA684919 | Transcribed sequences                                                                                                                                                                                                                                                                | 90    | 31   |
| AA684929 | Transcribed sequence with weak similarity to protein sp:Q62425 (M.musculus) NUML_MOUSE NADH-ubiquinone oxidoreductase MLRQ subunit (Complex I-MLRQ) (CI-MLRQ)                                                                                                                        | 60.5  | 15.1 |
| AA684960 | Transcribed sequence with weak similarity to protein sp:Q62425 (M.musculus) NUML_MOUSE NADH-ubiquinone oxidoreductase MLRQ subunit (Complex I-MLRQ) (CI-MLRQ)                                                                                                                        | 28.2  | 13.8 |
| AA684963 | Transcribed sequence with weak similarity to protein ref:NP_445760.1 (R.norvegicus) FK506 binding protein 2 (13 kDa) [Rattus norvegicus]                                                                                                                                             | 32.7  | 27.1 |
| AA685112 | Transcribed sequence with moderate similarity to protein sp:O00217 (H.sapiens) NUIM_HUMAN NADH-ubiquinone oxidoreductase 23 kDa subunit, mitochondrial precursor (Complex I-23KD) (CI-23KD) (TYKY subunit)                                                                           | 15.9  | 17.5 |
| AA685152 | Neural precursor cell expressed, developmentally down-regulated gene 8                                                                                                                                                                                                               | 28.2  | 19.6 |
| AA685175 | Transcribed sequence with moderate similarity to protein ref:NP_077243.1 (M.musculus) ribosome binding protein 1 isoform mRRp61 [Mus musculus]                                                                                                                                       | 31.9  | 24.7 |
| AA685217 | Transcribed sequences                                                                                                                                                                                                                                                                | 25.3  | 23.7 |
| AA685221 | Transcribed sequences                                                                                                                                                                                                                                                                | 20.9  | 10.1 |
| AA685376 | Transcribed sequence with weak similarity to protein sp:Q62425 (M.musculus) NUML_MOUSE NADH-ubiquinone oxidoreductase MLRQ subunit (Complex I-MLRQ) (CI-MLRQ)                                                                                                                        | 13.2  | 12   |
| AA685876 | cDNA clone RPNA25 5' end similar to NADH-cytochrome b5 reductase                                                                                                                                                                                                                     | 15.2  | 6.1  |
| AA685974 | Transcribed sequence with weak similarity to protein ref:NP_071796.1 (R.norvegicus) plectin [Rattus norvegicus]                                                                                                                                                                      | 33.3  | 15.5 |
| AA686031 | Transcribed sequence with strong similarity to protein pir:S17854 (H.sapiens) S17854 NADH dehydrogenase (ubiquinone) (EC 1.6.5.3) 75K chain precursor - human                                                                                                                        | 29.5  | 25.8 |
| AA686579 | Transcribed sequence with strong similarity to protein sp:Q93068 (M.musculus) SM33_HUMAN Ubiquitin-like protein SMT3C precursor (Ubiquitin-homology domain protein PIC1) (Ubiquitin-like protein UBL1) (Ubiquitin-related protein SUMO-1) (GAP modifying protein 1) (GMP1) (Sentrin) | 2.6   | 2.4  |
| AA686743 | eukaryotic translation initiation factor 2 alpha kinase 1                                                                                                                                                                                                                            | 15.2  | 8.4  |
| AA686870 | Transcribed sequence with weak similarity to protein sp:Q62425 (M.musculus) NUML_MOUSE NADH-ubiquinone oxidoreductase MLRQ subunit (Complex I-MLRQ) (CI-MLRQ)                                                                                                                        | 8.2   | 4.9  |
| AA686870 | Transcribed sequence with weak similarity to protein sp:Q62425 (M.musculus) NUML_MOUSE NADH-ubiquinone oxidoreductase MLRQ subunit (Complex I-MLRQ) (CI-MLRQ)                                                                                                                        | 3.5   | 2.4  |
| AA799276 | ATPase, Ca++ transporting, cardiac muscle, slow twitch 2                                                                                                                                                                                                                             | 27.9  | 16.7 |
| AA799299 | Adenylate kinase 1                                                                                                                                                                                                                                                                   | 37.3  | 26.9 |
| AA799301 | Transcribed sequence with strong similarity to protein sp:Q61211 (M.musculus) LIGA_MOUSE Ligatin                                                                                                                                                                                     | 10.9  | 8.4  |
| AA799317 | Transcribed sequence with moderate similarity to protein sp:Q92466 (H.sapiens) DDB2_HUMAN DNA damage binding protein 2 (Damage-specific DNA binding protein 2) (DDB p48 subunit) (DDBb) (UV-damaged DNA-binding protein 2) (UV-DDB 2)                                                | 3.1   | 1.9  |
| AA799323 | Transcribed sequence with moderate similarity to protein sp:P08567 (H.sapiens) PLEK_HUMAN Pleckstrin (Platelet p47 protein)                                                                                                                                                          | 15    | 10.9 |
| AA799326 | cd36 antigen                                                                                                                                                                                                                                                                         | 5.2   | 2.6  |
| AA799328 | Transcribed sequences                                                                                                                                                                                                                                                                | 7     | 10   |
| AA799330 | Transcribed sequence with strong similarity to protein ref:NP_057030.1 (H.sapiens) CGI-17 protein; pelota (Drosophila) homolog [Homo sapiens]                                                                                                                                        | 11.4  | 9.9  |
| AA799336 | Transcribed sequence with moderate similarity to protein pir:T00741 (H.sapiens) T00741 NADH dehydrogenase (ubiquinone) (EC 1.6.5.3) acyl carrier chain, mitochondrial - human (fragment)                                                                                             | 20.1  | 9.1  |
| AA799340 | tissue inhibitor of metalloproteinase 2                                                                                                                                                                                                                                              | 90.3  | 34.7 |
| AA799347 | Transcribed sequences                                                                                                                                                                                                                                                                | 20.9  | 16   |
| AA799389 | Rab3B protein                                                                                                                                                                                                                                                                        | 8.1   | 7.5  |
| AA799396 | Transcribed sequences                                                                                                                                                                                                                                                                | 29.4  | 14.4 |
| AA799396 | Transcribed sequences                                                                                                                                                                                                                                                                | 18.1  | 18.1 |
| AA799402 | Transcribed sequences                                                                                                                                                                                                                                                                | 6.5   | 3.1  |
| AA799410 | Transcribed sequences                                                                                                                                                                                                                                                                | 27    | 18.8 |
| AA799410 | Transcribed sequences                                                                                                                                                                                                                                                                | 11.3  | 7.8  |
| AA799412 | Transcribed sequence with weak similarity to protein pir:I67424 (R.norvegicus) I67424 hERR-2 homolog - rat (fragment)                                                                                                                                                                | 8.3   | 8.6  |
| AA799412 | Transcribed sequence with weak similarity to protein pir:I67424 (R.norvegicus) I67424 hERR-2 homolog - rat (fragment)                                                                                                                                                                | 2.9   | 0.8  |
| AA799418 | calcitonin gene-related peptide-receptor component protein                                                                                                                                                                                                                           | 44.5  | 30.5 |

|          |                                                                                                                                                                                                                                                                                  |       |      |
|----------|----------------------------------------------------------------------------------------------------------------------------------------------------------------------------------------------------------------------------------------------------------------------------------|-------|------|
| AA799421 | Transcribed sequence with strong similarity to protein sp:P09216 (R.norvegicus) KPCE_RAT PROTEIN KINASE C, EPSILON TYPE (NPKC-EPSILON)                                                                                                                                           | 7.5   | 5.5  |
| AA799423 | nexilin                                                                                                                                                                                                                                                                          | 17.5  | 19.8 |
| AA799427 | Transcribed sequence with strong similarity to protein ref:NP_079646.1 (M.musculus) RIKEN cDNA 1110018J18 [Mus musculus]                                                                                                                                                         | 31.9  | 21.9 |
| AA799434 | Transcribed sequence                                                                                                                                                                                                                                                             | 9.4   | 8.9  |
| AA799440 | Transcribed sequence with moderate similarity to protein ref:NP_054797.2 (H.sapiens) L13 protein [Homo sapiens]                                                                                                                                                                  | 18.3  | 15.8 |
| AA799442 | Transcribed sequence with weak similarity to protein ref:NP_079736.1 (M.musculus) RIKEN cDNA 1810020E01 [Mus musculus]                                                                                                                                                           | 30    | 8    |
| AA799442 | Transcribed sequence with weak similarity to protein ref:NP_079736.1 (M.musculus) RIKEN cDNA 1810020E01 [Mus musculus]                                                                                                                                                           | 29.9  | 18.1 |
| AA799448 | Transcribed sequences                                                                                                                                                                                                                                                            | 159.2 | 95.1 |
| AA799448 | Transcribed sequences                                                                                                                                                                                                                                                            | 14.3  | 12.4 |
| AA799449 | Transcribed sequence with strong similarity to protein ref:NP_032698.1 (M.musculus) nucleosome assembly protein 1 like 4; DNA segment, Chr 7, Wayne State University 30, expressed [Mus musculus]                                                                                | 25.2  | 12.7 |
| AA799449 | Transcribed sequence with strong similarity to protein ref:NP_032698.1 (M.musculus) nucleosome assembly protein 1 like 4; DNA segment, Chr 7, Wayne State University 30, expressed [Mus musculus]                                                                                | 6.5   | 6.9  |
| AA799450 | Transcribed sequences                                                                                                                                                                                                                                                            | 2.2   | 0.6  |
| AA799459 | Transcribed sequences                                                                                                                                                                                                                                                            | 4.6   | 2.4  |
| AA799464 | Transcribed sequence with moderate similarity to protein ref:NP_060665.1 (H.sapiens) hypothetical protein FLJ10726 [Homo sapiens]                                                                                                                                                | 21.8  | 6.2  |
| AA799465 | Transcribed sequence                                                                                                                                                                                                                                                             | 21.6  | 12.3 |
| AA799466 | Adenylate kinase 2                                                                                                                                                                                                                                                               | 12.6  | 9.5  |
| AA799467 | Transcribed sequences                                                                                                                                                                                                                                                            | 40.4  | 14.9 |
| AA799469 | Transcribed sequences                                                                                                                                                                                                                                                            | 62.5  | 15.5 |
| AA799471 | Transcribed sequence with strong similarity to protein sp:O70548 (M.musculus) TELT_MOUSE Telethonin (Titin cap protein)                                                                                                                                                          | 3.7   | 0.9  |
| AA799472 | Transcribed sequence with moderate similarity to protein sp:Q9Y3C0 (H.sapiens) AD16_HUMAN Protein AD-016 (Protein CGI-116) (x0009)                                                                                                                                               | 18.2  | 6    |
| AA799473 | Transcribed sequence with strong similarity to protein ref:NP_032870.1 (M.musculus) phosphatidylinositol-4-phosphate 5-kinase, type 1 gamma [Mus musculus]                                                                                                                       | 33.2  | 34.2 |
| AA799474 | Transcribed sequence with strong similarity to protein ref:NP_079843.1 (M.musculus) cytochrome c-1 [Mus musculus]                                                                                                                                                                | 34.7  | 15.6 |
| AA799475 | Transcribed sequence with weak similarity to protein pir:T08700 (H.sapiens) T08700 hypothetical protein DKFZp564G013.1 - human (fragment)                                                                                                                                        | 9.9   | 9.8  |
| AA799478 | ADP-ribosylation-like 3                                                                                                                                                                                                                                                          | 13.4  | 12.5 |
| AA799479 | Transcribed sequence with moderate similarity to protein sp:O00217 (H.sapiens) NUIM_HUMAN NADH-ubiquinone oxidoreductase 23 kDa subunit, mitochondrial precursor (Complex I-23KD) (CI-23KD) (TYKY subunit)                                                                       | 31.2  | 36.5 |
| AA799479 | Transcribed sequence with moderate similarity to protein sp:O00217 (H.sapiens) NUIM_HUMAN NADH-ubiquinone oxidoreductase 23 kDa subunit, mitochondrial precursor (Complex I-23KD) (CI-23KD) (TYKY subunit)                                                                       | 2.7   | 1    |
| AA799480 | R.norvegicus mRNA of retroviral origin                                                                                                                                                                                                                                           | 1.3   | 0.3  |
| AA799484 | protease (prosome, macropain) 28 subunit, alpha                                                                                                                                                                                                                                  | 7.4   | 3    |
| AA799487 | Transcribed sequences                                                                                                                                                                                                                                                            | 6.2   | 5.7  |
| AA799488 | Transcribed sequence with moderate similarity to protein pdb:1LBG (E. coli) B Chain B, Lactose Operon Repressor Bound To 21-Base Pair Symmetric Operator Dna, Alpha Carbons Only                                                                                                 | 7.9   | 7.2  |
| AA799489 | acyl-coA oxidase                                                                                                                                                                                                                                                                 | 26.1  | 11.8 |
| AA799489 | acyl-coA oxidase                                                                                                                                                                                                                                                                 | 3.7   | 4.5  |
| AA799492 | proteasome (prosome, macropain) subunit, alpha type 6                                                                                                                                                                                                                            | 20.5  | 18.9 |
| AA799494 | Transcribed sequence with weak similarity to protein ref:NP_082160.1 (M.musculus) tensin [Mus musculus]                                                                                                                                                                          | 5.7   | 2.2  |
| AA799495 | Transcribed sequences                                                                                                                                                                                                                                                            | 2.4   | 0.9  |
| AA799497 | Transcribed sequences                                                                                                                                                                                                                                                            | 15.7  | 13.2 |
| AA799497 | Transcribed sequences                                                                                                                                                                                                                                                            | 4.2   | 2.1  |
| AA799498 | natriuretic peptide precursor type B                                                                                                                                                                                                                                             | 8.9   | 9.1  |
| AA799505 | Transcribed sequence with moderate similarity to protein ref:NP_002426.1 (H.sapiens) mannose-6-phosphate isomerase; Mannosephosphate isomerase (phosphomannose isomerase 1) [Homo sapiens]                                                                                       | 23.6  | 19.1 |
| AA799507 | Transcribed sequences                                                                                                                                                                                                                                                            | 33.9  | 26.4 |
| AA799508 | microtubule-associated proteins 1A/1B light chain 3                                                                                                                                                                                                                              | 14.8  | 9.2  |
| AA799511 | Transcribed sequence with weak similarity to protein pir:DDRT (R.norvegicus) DDRT helix-destabilizing protein - rat                                                                                                                                                              | 21.9  | 4.7  |
| AA799512 | Transcribed sequence with strong similarity to protein sp:Q9Z1K6 (M.musculus) ARI2_MOUSE Ariadne-2 protein homolog (ARI-2) (Triad1 protein) (UbcM4-interacting protein 48)                                                                                                       | 20.9  | 12.1 |
| AA799513 | Transcribed sequence with strong similarity to protein pir:S30247 (H.sapiens) S30247 Hin-1 protein - human                                                                                                                                                                       | 7.6   | 4.6  |
| AA799515 | Transcribed sequence with weak similarity to protein sp:P43035 (R.norvegicus) LIS1_MOUSE Platelet-activating factor acetylhydrolase IB alpha subunit (PAF acetylhydrolase 45 kDa subunit) (PAF-AH 45 kDa subunit) (PAF-AH alpha) (PAFAH alpha) (Lissencephaly-1 protein) (LIS-1) | 22.9  | 18.8 |
| AA799518 | Transcribed sequence with moderate similarity to protein ref:NP_075223.1 (R.norvegicus) DnaJ-like protein [Rattus norvegicus]                                                                                                                                                    | 34.2  | 7.5  |
| AA799518 | Transcribed sequence with moderate similarity to protein ref:NP_075223.1 (R.norvegicus) DnaJ-like protein [Rattus norvegicus]                                                                                                                                                    | 11.5  | 12.2 |
| AA799523 | Transcribed sequence with weak similarity to protein pir:DDRT (R.norvegicus) DDRT helix-destabilizing protein - rat                                                                                                                                                              | 11.6  | 9.6  |

|          |                                                                                                                                                                                                                                                                                  |      |      |
|----------|----------------------------------------------------------------------------------------------------------------------------------------------------------------------------------------------------------------------------------------------------------------------------------|------|------|
| AA799531 | Transcribed sequence with moderate similarity to protein ref:NP_061921.1 (H.sapiens) hypothetical protein FLJ20752 [Homo sapiens]                                                                                                                                                | 58.2 | 28.8 |
| AA799531 | Transcribed sequence with moderate similarity to protein ref:NP_061921.1 (H.sapiens) hypothetical protein FLJ20752 [Homo sapiens]                                                                                                                                                | 25.6 | 15.4 |
| AA799534 | Transcribed sequences                                                                                                                                                                                                                                                            | 37.3 | 20.3 |
| AA799537 | inositol 1, 4, 5-triphosphate receptor 3                                                                                                                                                                                                                                         | 7.2  | 1.5  |
| AA799539 | Transcribed sequence with weak similarity to protein sp:P57790 (R.norvegicus) KEAP_RAT Kelch-like ECH-associated protein 1 (Cytosolic inhibitor of Nrf2) (INrf2)                                                                                                                 | 17.2 | 10.3 |
| AA799541 | dodecenoyl-coenzyme A delta isomerase                                                                                                                                                                                                                                            | 41.8 | 13.8 |
| AA799543 | zinc finger protein Y1 (RLZF-Y)                                                                                                                                                                                                                                                  | 6.8  | 4.1  |
| AA799544 | Transcribed sequence with moderate similarity to protein sp:P57016 (M.musculus) LAD1_MOUSE Ladinin 1 (Lad-1) (Linear IgA disease autoantigen)                                                                                                                                    | 14.7 | 7.6  |
| AA799551 | Transcribed sequence with weak similarity to protein prf:1515250A (R.norvegicus) 1515250A rab1B protein [Rattus norvegicus]                                                                                                                                                      | 13.9 | 5.2  |
| AA799552 | Transcribed sequence with moderate similarity to protein ref:NP_079563.1 (M.musculus) speckle-type POZ protein [Mus musculus]                                                                                                                                                    | 11.8 | 2.9  |
| AA799554 | Transcribed sequences                                                                                                                                                                                                                                                            | 5.3  | 4.4  |
| AA799560 | N-myc downstream-regulated gene 2                                                                                                                                                                                                                                                | 4.2  | 2    |
| AA799566 | Transcribed sequence with strong similarity to protein ref:NP_082428.1 (M.musculus) MMS19 (MET18 S. cerevisiae)-like; 2410001K24Rik [Mus musculus]                                                                                                                               | 41.5 | 23.6 |
| AA799566 | Transcribed sequence with strong similarity to protein ref:NP_082428.1 (M.musculus) MMS19 (MET18 S. cerevisiae)-like; 2410001K24Rik [Mus musculus]                                                                                                                               | 27   | 6.2  |
| AA799567 | Transcribed sequences                                                                                                                                                                                                                                                            | 3.4  | 1    |
| AA799572 | Transcribed sequence with weak similarity to protein pir:T13576 (D.melanogaster) T13576 hypothetical protein 52C10.5 - fruit fly (Drosophila melanogaster)                                                                                                                       | 8.9  | 7.1  |
| AA799575 | Peptidylglycine alpha-amidating monooxygenase                                                                                                                                                                                                                                    | 43.6 | 15   |
| AA799575 | Peptidylglycine alpha-amidating monooxygenase                                                                                                                                                                                                                                    | 15.8 | 10.2 |
| AA799575 | Peptidylglycine alpha-amidating monooxygenase                                                                                                                                                                                                                                    | 8.5  | 2.5  |
| AA799576 | Transcribed sequence with strong similarity to protein ref:NP_444413.1 (M.musculus) nucleolar protein GU2 [Mus musculus]                                                                                                                                                         | 22.8 | 21.7 |
| AA799580 | Transcribed sequences                                                                                                                                                                                                                                                            | 3.8  | 0.7  |
| AA799581 | Transcribed sequence with moderate similarity to protein sp:Q93075 (H.sapiens) Y218_HUMAN Putative deoxyribonuclease KIAA0218                                                                                                                                                    | 16.2 | 17.3 |
| AA799591 | Transcribed sequence with strong similarity to protein prf:1202265A (R.norvegicus) 1202265A tubulin T beta15 [Rattus norvegicus]                                                                                                                                                 | 20   | 14.9 |
| AA799593 | Transcribed sequences                                                                                                                                                                                                                                                            | 20.9 | 15.8 |
| AA799594 | Rattus norvegicus cDNA, 3' end /clone=RHEAC90 /clone_end=3' /gb=AA799594 /gi=2862549 /ug=Rn.3800 /len=569                                                                                                                                                                        | 11.6 | 7.5  |
| AA799600 | Transcribed sequence with weak similarity to protein sp:P43035 (R.norvegicus) LIS1_MOUSE Platelet-activating factor acetylhydrolase IB alpha subunit (PAF acetylhydrolase 45 kDa subunit) (PAF-AH 45 kDa subunit) (PAF-AH alpha) (PAFAH alpha) (Lissencephaly-1 protein) (LIS-1) | 8    | 8.3  |
| AA799601 | Transcribed sequences                                                                                                                                                                                                                                                            | 7.5  | 7    |
| AA799604 | Transcribed sequences                                                                                                                                                                                                                                                            | 16   | 10.3 |
| AA799609 | Transcribed sequence with strong similarity to protein pir:T43443 (H.sapiens) T43443 hypothetical protein DKFZp434A2315.1 - human (fragment)                                                                                                                                     | 18.8 | 12.2 |
| AA799611 | Transcribed sequence with weak similarity to protein ref:NP_077334.1 (R.norvegicus) Notch gene homolog 2, (Drosophila) [Rattus norvegicus]                                                                                                                                       | 7.6  | 6.2  |
| AA799612 | ubiquitin conjugating enzyme                                                                                                                                                                                                                                                     | 25.3 | 20.8 |
| AA799621 | Transcribed sequences                                                                                                                                                                                                                                                            | 47.5 | 35.6 |
| AA799633 | Transcribed sequence with weak similarity to protein ref:NP_115719.1 (H.sapiens) hypothetical protein MGC13016 [Homo sapiens]                                                                                                                                                    | 29.7 | 12.3 |
| AA799636 | Transcribed sequences                                                                                                                                                                                                                                                            | 23.3 | 10.7 |
| AA799637 | Rattus norvegicus cDNA, 3' end /clone=RHEAD45 /clone_end=3' /gb=AA799637 /gi=2862592 /ug=Rn.25425 /len=571                                                                                                                                                                       | 12.8 | 9.4  |
| AA799637 | Rattus norvegicus cDNA, 3' end /clone=RHEAD45 /clone_end=3' /gb=AA799637 /gi=286259                                                                                                                                                                                              | 7.5  | 4.8  |
| AA799641 | Transcribed sequence with strong similarity to protein ref:NP_036162.1 (M.musculus) tumor differentially expressed 1 [Mus musculus]                                                                                                                                              | 13.5 | 9    |
| AA799645 | FXFD domain-containing ion transport regulator 1                                                                                                                                                                                                                                 | 5.9  | 3.6  |
| AA799650 | peroxiredoxin 3                                                                                                                                                                                                                                                                  | 54.4 | 29.6 |
| AA799650 | peroxiredoxin 3                                                                                                                                                                                                                                                                  | 45.7 | 22.8 |
| AA799654 | Transcribed sequence with strong similarity to protein ref:NP_038936.1 (M.musculus) f-box and WD-40 domain protein 5; F-box protein Fbw5 [Mus musculus]                                                                                                                          | 23.6 | 16.5 |
| AA799656 | Transcribed sequence with moderate similarity to protein ref:NP_065585.1 (M.musculus) mitochondrial ribosomal protein S31; islet mitochondrial antigen, 38 kD [Mus musculus]                                                                                                     | 59.1 | 14.6 |
| AA799656 | Transcribed sequence with moderate similarity to protein ref:NP_065585.1 (M.musculus) mitochondrial ribosomal protein S31; islet mitochondrial antigen, 38 kD [Mus musculus]                                                                                                     | 2.9  | 3.6  |
| AA799663 | Transcribed sequence with strong similarity to protein sp:P54797 (M.musculus) T10_MOUSE Ser/Thr-rich protein T10 in DGCR region                                                                                                                                                  | 11.9 | 5.8  |
| AA799663 | Transcribed sequence with strong similarity to protein sp:P54797 (M.musculus) T10_MOUSE Ser/Thr-rich protein T10 in DGCR region                                                                                                                                                  | 9.6  | 9.6  |
| AA799666 | Transcribed sequences                                                                                                                                                                                                                                                            | 21.6 | 23.6 |
| AA799666 | Transcribed sequences                                                                                                                                                                                                                                                            | 2.3  | 1.6  |
| AA799671 | Rattus norvegicus cDNA, 3' end /clone=RHEAD82 /clone_end=3' /gb=AA799671 /gi=2862626 /ug=Rn.                                                                                                                                                                                     | 10.1 | 6.9  |
| AA799676 | Transcribed sequences                                                                                                                                                                                                                                                            | 2.4  | 0.8  |
| AA799678 | EGL nine homolog 3 (C. elegans)                                                                                                                                                                                                                                                  | 14.2 | 17.7 |
| AA799679 | solute carrier family 22, member 1                                                                                                                                                                                                                                               | 37.8 | 43.1 |
| AA799680 | Transcribed sequences                                                                                                                                                                                                                                                            | 15.9 | 6.8  |
| AA799681 | Transcribed sequences                                                                                                                                                                                                                                                            | 28.4 | 4.4  |

|          |                                                                                                                                                                                                                         |      |      |
|----------|-------------------------------------------------------------------------------------------------------------------------------------------------------------------------------------------------------------------------|------|------|
| AA799683 | Transcribed sequence with weak similarity to protein sp:Q9WUI9 (R.norvegicus) NCO2_RAT Nuclear receptor coactivator 2 (Transcriptional intermediary factor 2)                                                           | 45.7 | 24.6 |
| AA799686 | Transcribed sequences                                                                                                                                                                                                   | 8.5  | 7.8  |
| AA799687 | Transcribed sequences                                                                                                                                                                                                   | 13.4 | 12.8 |
| AA799690 | Transcribed sequence                                                                                                                                                                                                    | 3    | 1.5  |
| AA799691 | Transcribed sequence with weak similarity to protein pir:T31432 (R.norvegicus) T31432 K-Cl cotransport protein 2, furosemide-sensitive - rat                                                                            | 20   | 16.7 |
| AA799717 | Transcribed sequence with weak similarity to protein ref:NP_080177.1 (M.musculus) RIKEN cDNA 1500004O14 [Mus musculus]                                                                                                  | 23.7 | 11.6 |
| AA799718 | Transcribed sequence with strong similarity to protein ref:NP_079881.1 (M.musculus) RIKEN cDNA 2400001E08 [Mus musculus]                                                                                                | 82.5 | 54.2 |
| AA799721 | Transcribed sequence with weak similarity to protein ref:NP_543181.1 (R.norvegicus) seven in absentia 1A [Rattus norvegicus]                                                                                            | 12.7 | 9.4  |
| AA799721 | Transcribed sequence with weak similarity to protein ref:NP_543181.1 (R.norvegicus) seven in absentia 1A [Rattus norvegicus]                                                                                            | 12.1 | 7.9  |
| AA799724 | Transcribed sequence with strong similarity to protein sp:P97304 (M.musculus) RPA9_MOUSE DNA-directed RNA polymerase I 16 kDa polypeptide (RPA16)                                                                       | 20.3 | 7.1  |
| AA799726 | Transcribed sequences                                                                                                                                                                                                   | 17.4 | 18.7 |
| AA799729 | Phosphodiesterase 4B, cAMP-specific (dunce (Drosophila)-homolog phosphodiesterase E4)                                                                                                                                   | 18   | 19.8 |
| AA799732 | Transcribed sequence with strong similarity to protein sp:O35347 (M.musculus) DGC6_MOUSE DGCR6 PROTEIN (DIGEORGE SYNDROME CRITICAL REGION 6 HOMOLOG)                                                                    | 2.5  | 1.4  |
| AA799734 | Transcribed sequences                                                                                                                                                                                                   | 3.7  | 2.9  |
| AA799735 | homer, neuronal immediate early gene, 1                                                                                                                                                                                 | 41.7 | 24.1 |
| AA799735 | homer, neuronal immediate early gene, 1                                                                                                                                                                                 | 21.2 | 17.4 |
| AA799740 | Transcribed sequences                                                                                                                                                                                                   | 3.6  | 4.1  |
| AA799741 | Transcribed sequence with moderate similarity to protein ref:NP_003162.1 (H.sapiens) suppressor of var1, 3-like 1 (S. cerevisiae); suppressor of var1 (S.cerevisiae) 3-like 1 [Homo sapiens]                            | 8.9  | 7.8  |
| AA799744 | Transcribed sequences                                                                                                                                                                                                   | 48.4 | 14.8 |
| AA799745 | CDK5 activator-binding protein C53                                                                                                                                                                                      | 54.3 | 28.3 |
| AA799745 | CDK5 activator-binding protein C53                                                                                                                                                                                      | 24.9 | 17.7 |
| AA799755 | Transcribed sequence with weak similarity to protein ref:NP_113954.1 (R.norvegicus) carboxypeptidase Z [Rattus norvegicus]                                                                                              | 12.1 | 15.3 |
| AA799760 | solute carrier family 2, member 4                                                                                                                                                                                       | 12.2 | 9.8  |
| AA799761 | Transcribed sequence with moderate similarity to protein sp:P27512 (M.musculus) TNFR5_MOUSE Tumor necrosis factor receptor superfamily member 5 precursor (CD40L receptor) (B-cell surface antigen CD40) (BP50) (CDw40) | 3.4  | 1.7  |
| AA799762 | Transcribed sequence with moderate similarity to protein ref:NP_077275.1 (H.sapiens) chromosome 20 open reading frame 149 [Homo sapiens]                                                                                | 31.1 | 21.8 |
| AA799762 | Transcribed sequence with moderate similarity to protein ref:NP_077275.1 (H.sapiens) chromosome 20 open reading frame 149 [Homo sapiens]                                                                                | 18.1 | 12.9 |
| AA799764 | Transcribed sequences                                                                                                                                                                                                   | 29.9 | 15   |
| AA799766 | Transcribed sequence with moderate similarity to protein ref:NP_006294.2 (H.sapiens) JTV1; hypothetical protein PRO0992 [Homo sapiens]                                                                                  | 17   | 16.3 |
| AA799771 | Transcribed sequences                                                                                                                                                                                                   | 12.6 | 10.7 |
| AA799773 | Transcribed sequence with strong similarity to protein ref:NP_001449.1 (H.sapiens) gamma filamin; filamin C gamma (actin-binding protein-280); filamin 2; actin-binding protein 280 [Homo sapiens]                      | 48.3 | 19.7 |
| AA799773 | Transcribed sequence with strong similarity to protein ref:NP_001449.1 (H.sapiens) gamma filamin; filamin C gamma (actin-binding protein-280); filamin 2; actin-binding protein 280 [Homo sapiens]                      | 8.2  | 8.9  |
| AA799779 | acyl-CoA:dihydroxyacetonephosphate acyltransferase                                                                                                                                                                      | 25.4 | 22.8 |
| AA799779 | acyl-CoA:dihydroxyacetonephosphate acyltransferase                                                                                                                                                                      | 18.2 | 13.3 |
| AA799783 | Transcribed sequences                                                                                                                                                                                                   | 58.8 | 29.4 |
| AA799786 | ATP-binding cassette, subfamily C (CFTR/MRP), member 8                                                                                                                                                                  | 11.4 | 11.6 |
| AA799788 | Transcribed sequence with weak similarity to protein ref:NP_112400.1 (R.norvegicus) ubiquitin conjugating enzyme [Rattus norvegicus]                                                                                    | 18.5 | 14.7 |
| AA799791 | Transcribed sequence with weak similarity to protein ref:NP_113923.1 (R.norvegicus) serine/threonine kinase 3 (Ste20, yeast homolog) STK3 [Rattus norvegicus]                                                           | 16.3 | 9.7  |
| AA799792 | Carboxyl ester lipase                                                                                                                                                                                                   | 26.7 | 11.7 |
| AA799796 | Transcribed sequences                                                                                                                                                                                                   | 31.8 | 20.1 |
| AA799800 | Transcribed sequence with weak similarity to protein sp:O55170 (R.norvegicus) SX10_RAT TRANSCRIPTION FACTOR SOX-10                                                                                                      | 2.4  | 1.7  |
| AA799801 | Transcribed sequence with moderate similarity to protein ref:NP_065641.1 (M.musculus) predicted gene ICRFP703B1614Q5.6; ICRFP703N2430Q5.6; C11orf17 [Mus musculus]                                                      | 35.5 | 36.1 |
| AA799801 | Transcribed sequence with moderate similarity to protein ref:NP_065641.1 (M.musculus) predicted gene ICRFP703B1614Q5.6; ICRFP703N2430Q5.6; C11orf17 [Mus musculus]                                                      | 28.8 | 16.4 |
| AA799803 | Transcribed sequence with weak similarity to protein pir:JC6554 (R.norvegicus) JC6554 complement subcomponent C1s (EC 3.4.21.42) precursor [similarity] - rat                                                           | 4.6  | 2    |
| AA799812 | Transcribed sequence with moderate similarity to protein pir:A41109 (H.sapiens) A41109 protein-tyrosine-phosphatase (EC 3.1.3.48), nonreceptor type 3 - human                                                           | 39.9 | 15.9 |
| AA799812 | Transcribed sequence with moderate similarity to protein pir:A41109 (H.sapiens) A41109 protein-tyrosine-phosphatase (EC 3.1.3.48), nonreceptor type 3 - human                                                           | 5.5  | 5.7  |
| AA799814 | MAP kinase-activated protein kinase 2                                                                                                                                                                                   | 28.3 | 13.2 |
| AA799816 | Transcribed sequence with strong similarity to protein pir:T46306 (H.sapiens) T46306 hypothetical protein DKFZp434D2411.1 - human (fragment)                                                                            | 5.9  | 5.3  |
| AA799822 | Transcribed sequences                                                                                                                                                                                                   | 10.4 | 12.2 |
| AA799829 | Transcribed sequence with moderate similarity to protein ref:NP_080812.1 (M.musculus) mitochondrial ATP synthase regulatory component factor B [Mus musculus]                                                           | 4    | 6.1  |
| AA799832 | Transcribed sequences                                                                                                                                                                                                   | 7.3  | 8    |
| AA799847 | Transcribed sequences                                                                                                                                                                                                   | 2.5  | 1.2  |

|          |                                                                                                                                                                                    |       |      |
|----------|------------------------------------------------------------------------------------------------------------------------------------------------------------------------------------|-------|------|
| AA799851 | Transcribed sequence with moderate similarity to protein ref:NP_060667.1 (H.sapiens) hypothetical protein FLJ10734; likely ortholog of mouse zinc finger protein 64 [Homo sapiens] | 18.7  | 17.2 |
| AA799854 | Transcribed sequence with weak similarity to protein ref:NP_114428.1 (H.sapiens) hypothetical protein DKFZp761D0211 [Homo sapiens]                                                 | 38.3  | 30.2 |
| AA799861 | Transcribed sequence with strong similarity to protein sp:P70434 (M.musculus) IRF7_MOUSE Interferon regulatory factor 7 (IRF-7)                                                    | 40.5  | 39   |
| AA799865 | Transcribed sequences                                                                                                                                                              | 4.8   | 2.2  |
| AA799871 | Transcribed sequences                                                                                                                                                              | 3.7   | 1    |
| AA799879 | Transcribed sequence with moderate similarity to protein sp:Q62876 (R.norvegicus) SNG1_RAT SYNAPTOGYRIN 1 (P29)                                                                    | 21.5  | 10.6 |
| AA799883 | Transcribed sequence                                                                                                                                                               | 8.1   | 7.9  |
| AA799888 | Transcribed sequence with strong similarity to protein ref:NP_035052.1 (M.musculus) nuclear localization signal protein absent in velo-cardio-facial patients [Mus musculus]       | 4.3   | 1.3  |
| AA799889 | Transcribed sequences                                                                                                                                                              | 17.8  | 7.1  |
| AA799891 | golgi peripheral membrane protein p65                                                                                                                                              | 17.5  | 15.5 |
| AA799891 | golgi peripheral membrane protein p65                                                                                                                                              | 2.3   | 2.2  |
| AA799893 | heterogeneous nuclear ribonucleoprotein A1                                                                                                                                         | 29.2  | 19.4 |
| AA799893 | heterogeneous nuclear ribonucleoprotein A1                                                                                                                                         | 26.6  | 8    |
| AA799932 | Transcribed sequences                                                                                                                                                              | 7.5   | 5.4  |
| AA799942 | Transcribed sequence with weak similarity to protein sp:P03975 (M.musculus) IGEB_MOUSE IGE-BINDING PROTEIN                                                                         | 8.6   | 9.8  |
| AA799964 | Transcribed sequences                                                                                                                                                              | 34.2  | 32   |
| AA799971 | Transcribed sequence with moderate similarity to protein ref:NP_060761.1 (H.sapiens) hypothetical protein FLJ10986 [Homo sapiens]                                                  | 41.3  | 19.3 |
| AA799971 | Transcribed sequence with moderate similarity to protein ref:NP_060761.1 (H.sapiens) hypothetical protein FLJ10986 [Homo sapiens]                                                  | 24    | 7.7  |
| AA799992 | Transcribed sequence with moderate similarity to protein ref:NP_065641.1 (M.musculus) predicted gene ICRFP703B1614Q5.6; ICRFP703N2430Q5.6; C11orf17 [Mus musculus]                 | 34.6  | 11.7 |
| AA799992 | Transcribed sequence with moderate similarity to protein ref:NP_065641.1 (M.musculus) predicted gene ICRFP703B1614Q5.6; ICRFP703N2430Q5.6; C11orf17 [Mus musculus]                 | 9.8   | 8.1  |
| AA799995 | ribosomal protein L14                                                                                                                                                              | 5.5   | 1.4  |
| AA799997 | Transcribed sequence                                                                                                                                                               | 36.3  | 13.2 |
| AA800001 | Transcribed sequence with weak similarity to protein sp:P08723 (R.norvegicus) SPBP_RAT Prostatic spermine-binding protein precursor (SBP)                                          | 7     | 2.6  |
| AA800004 | Transcribed sequence with moderate similarity to protein ref:NP_446383.1 (R.norvegicus) peanut (Drosophila)-like 1 [Rattus norvegicus]                                             | 4     | 3.4  |
| AA800016 | Transcribed sequence with weak similarity to protein ref:NP_492674.1 (C.elegans) Yeast ABD1 protein like [Caenorhabditis elegans]                                                  | 30.2  | 27.7 |
| AA800017 | Transcribed sequences                                                                                                                                                              | 29.3  | 11.7 |
| AA800024 | Transcribed sequence with strong similarity to protein pir:T08721 (H.sapiens) T08721 hypothetical protein DKFZp566C243.1 - human                                                   | 23.9  | 16.9 |
| AA800025 | Transcribed sequence with strong similarity to protein ref:NP_542787.1 (H.sapiens) chromosome 20 open reading frame 163 [Homo sapiens]                                             | 43    | 23.1 |
| AA800025 | Transcribed sequence with strong similarity to protein ref:NP_542787.1 (H.sapiens) chromosome 20 open reading frame 163 [Homo sapiens]                                             | 19.9  | 16.7 |
| AA800026 | Transcribed sequences                                                                                                                                                              | 3     | 2.2  |
| AA800029 | Transcribed sequence with strong similarity to protein pir:T14792 (H.sapiens) T14792 hypothetical protein DKFZp586G0322.1 - human (fragment)                                       | 40    | 15.5 |
| AA800033 | glutamate receptor, ionotropic, NMDA3B                                                                                                                                             | 37.3  | 19.8 |
| AA800036 | Transcribed sequence with strong similarity to protein ref:NP_038956.1 (M.musculus) schwannomin interacting protein 1; neurofibromatosis 2 interacting protein [Mus musculus]      | 19.4  | 16.1 |
| AA800039 | Transcribed sequence with weak similarity to protein ref:NP_569090.1 (R.norvegicus) Fas-associated factor 1 [Rattus norvegicus]                                                    | 119.7 | 32.3 |
| AA800044 | Transcribed sequences                                                                                                                                                              | 27.9  | 15.5 |
| AA800046 | Transcribed sequence with moderate similarity to protein ref:NP_057119.1 (H.sapiens) CGI-92 protein [Homo sapiens]                                                                 | 13.6  | 11.3 |
| AA800053 | Transcribed sequence with strong similarity to protein ref:NP_080833.1 (M.musculus) RIKEN cDNA 6720407C15 [Mus musculus]                                                           | 21    | 14.9 |
| AA800059 | syndecan 4                                                                                                                                                                         | 14.8  | 13.9 |
| AA800063 | MAP/microtubule affinity-regulating kinase 1                                                                                                                                       | 47.8  | 19.7 |
| AA800105 | Transcribed sequence with weak similarity to protein ref:NP_077061.1 (R.norvegicus) RNB6 [Rattus norvegicus]                                                                       | 3     | 2.1  |
| AA800120 | solute carrier family 25 (carnitine/acylcarnitine translocase), member 20                                                                                                          | 17.6  | 14.6 |
| AA800126 | Transcribed sequence with weak similarity to protein pir:I55595 (H.sapiens) I55595 splicing factor - human                                                                         | 9.2   | 8.6  |
| AA800146 | Transcribed sequences                                                                                                                                                              | 9.1   | 7    |
| AA800148 | protein kinase C and casein kinase substrate in neurons 2                                                                                                                          | 21    | 16.7 |
| AA800156 | Transcribed sequence with moderate similarity to protein pir:A57090 (H.sapiens) A57090 CSA protein - human                                                                         | 7.3   | 5.2  |
| AA800168 | Transcribed sequences                                                                                                                                                              | 10.6  | 12   |
| AA800169 | Transcribed sequences                                                                                                                                                              | 40.1  | 15   |
| AA800172 | Transcribed sequence with moderate similarity to protein ref:NP_080601.1 (M.musculus) RIKEN cDNA 1810059G22 [Mus musculus]                                                         | 6.8   | 5.7  |
| AA800175 | Transcribed sequence with strong similarity to protein pir:JC7136 (M.musculus) JC7136 peptidylprolyl isomerase (EC 5.2.1.8) - mouse                                                | 14.6  | 10.8 |
| AA800176 | Transcribed sequence with moderate similarity to protein ref:NP_064709.1 (H.sapiens) hypothetical protein LOC57019 [Homo sapiens]                                                  | 9.6   | 8.5  |
| AA800177 | Transcribed sequence with strong similarity to protein ref:NP_062457.1 (H.sapiens) hypothetical protein RP1-317E23 [Homo sapiens]                                                  | 2.8   | 1.4  |

|          |                                                                                                                                                                                                                                |      |      |
|----------|--------------------------------------------------------------------------------------------------------------------------------------------------------------------------------------------------------------------------------|------|------|
| AA800179 | Rattus norvegicus DD6A4-2(5) mRNA, partial sequence                                                                                                                                                                            | 8.7  | 7.2  |
| AA800184 | Transcribed sequences                                                                                                                                                                                                          | 15.1 | 13.4 |
| AA800186 | Transcribed sequences                                                                                                                                                                                                          | 9.3  | 6.7  |
| AA800188 | Transcribed sequence with moderate similarity to protein ref:NP_060390.1 (H.sapiens) up-regulated gene 4 [Homo sapiens]                                                                                                        | 68   | 32.7 |
| AA800190 | Brain glycogen phosphorylase                                                                                                                                                                                                   | 15.8 | 6    |
| AA800194 | Transcribed sequence with moderate similarity to protein ref:NP_003841.1 (H.sapiens) succinate-CoA ligase, ADP-forming, beta subunit; SCS-betaA for ATP specific succinyl CoA synthetase beta subunit precursor [Homo sapiens] | 1.9  | 1    |
| AA800197 | Transcribed sequences                                                                                                                                                                                                          | 23.9 | 8.2  |
| AA800198 | Transcribed sequence with strong similarity to protein ref:NP_079937.1 (M.musculus) RIKEN cDNA 2810011N17 [Mus musculus]                                                                                                       | 67   | 44.7 |
| AA800200 | Transcribed sequence with weak similarity to protein ref:NP_071355.1 (H.sapiens) hypothetical protein FLJ22609 [Homo sapiens]                                                                                                  | 37.9 | 17   |
| AA800202 | Transcribed sequences                                                                                                                                                                                                          | 5.7  | 3.6  |
| AA800206 | Transcribed sequence with moderate similarity to protein sp:Q9Z1P2 (R.norvegicus) AAC1_RAT Alpha-actinin 1 (Alpha-actinin cytoskeletal isoform) (Non-muscle alpha-actinin 1) (F-actin cross linking protein)                   | 13.3 | 7.7  |
| AA800211 | pyridoxine 5-phosphate oxidase                                                                                                                                                                                                 | 41.6 | 16.1 |
| AA800216 | Transcribed sequence with strong similarity to protein ref:NP_036048.1 (M.musculus) LIM domain binding 3; Z-band alternatively spliced PDZ-motif protein; cypher 1; cypher 2 [Mus musculus]                                    | 34   | 11.9 |
| AA800218 | Transcribed sequence with moderate similarity to protein ref:NP_116179.1 (H.sapiens) hypothetical protein FLJ14466 [Homo sapiens]                                                                                              | 22.1 | 7.8  |
| AA800221 | small muscle protein, X-linked                                                                                                                                                                                                 | 17.7 | 8.7  |
| AA800224 | Transcribed sequence with moderate similarity to protein ref:NP_060615.1 (H.sapiens) hypothetical protein FLJ10579 [Homo sapiens]                                                                                              | 42.3 | 20   |
| AA800228 | PIPPin protein                                                                                                                                                                                                                 | 15.5 | 9.9  |
| AA800232 | Transcribed sequences                                                                                                                                                                                                          | 13.8 | 5.7  |
| AA800235 | Transcribed sequence with weak similarity to protein ref:NP_570953.1 (M.musculus) CAMP [Mus musculus]                                                                                                                          | 18   | 7.8  |
| AA800243 | Transcribed sequence with weak similarity to protein ref:NP_446131.1 (R.norvegicus) DNA fragmentation factor, alpha subunit [Rattus norvegicus]                                                                                | 17.5 | 7.6  |
| AA800245 | Transcribed sequence with weak similarity to protein ref:NP_543179.1 (R.norvegicus) ring finger protein 28; muscle ring finger protein 1 [Rattus norvegicus]                                                                   | 47.8 | 40.8 |
| AA800258 | Transcribed sequence with moderate similarity to protein ref:NP_038609.2 (M.musculus) low density lipoprotein B [Mus musculus]                                                                                                 | 16.8 | 12   |
| AA800260 | Transcribed sequences                                                                                                                                                                                                          | 8.4  | 7.6  |
| AA800265 | Transcribed sequence with moderate similarity to protein pdb:1LBG (E. coli) B Chain B, Lactose Operon Repressor Bound To 21-Base Pair Symmetric Operator Dna, Alpha Carbons Only                                               | 2.7  | 0.8  |
| AA800272 | Transcribed sequence with strong similarity to protein sp:P18665 (R.norvegicus) RM03_RAT Mitochondrial 60S ribosomal protein L3                                                                                                | 5.5  | 2.2  |
| AA800275 | Transcribed sequences                                                                                                                                                                                                          | 7.7  | 5.2  |
| AA800277 | Transcribed sequence with weak similarity to protein pir:B40535 (R.norvegicus) B40535 clathrin-associated protein 17 - rat                                                                                                     | 37.7 | 22.2 |
| AA800285 | Transcribed sequences                                                                                                                                                                                                          | 6.3  | 3.2  |
| AA800290 | Transcribed sequence with strong similarity to protein ref:NP_080395.1 (M.musculus) RIKEN cDNA 2410046H15 [Mus musculus]                                                                                                       | 24.6 | 8.3  |
| AA800290 | Transcribed sequence with strong similarity to protein ref:NP_080395.1 (M.musculus) RIKEN cDNA 2410046H15 [Mus musculus]                                                                                                       | 7    | 5.4  |
| AA800291 | Transcribed sequence with weak similarity to protein ref:NP_113827.1 (R.norvegicus) discs, large homolog 3 (Drosophila) [Rattus norvegicus]                                                                                    | 12.4 | 9.3  |
| AA800298 | Transcribed sequences                                                                                                                                                                                                          | 24   | 18.1 |
| AA800303 | Transcribed sequence with moderate similarity to protein pdb:1LBG (E. coli) B Chain B, Lactose Operon Repressor Bound To 21-Base Pair Symmetric Operator Dna, Alpha Carbons Only                                               | 16.8 | 6.7  |
| AA800305 | Transcribed sequence with strong similarity to protein ref:NP_073183.1 (R.norvegicus) small GTP-binding protein rab5 [Rattus norvegicus]                                                                                       | 12   | 8.7  |
| AA800315 | Transcribed sequence with strong similarity to protein ref:NP_002848.1 (H.sapiens) peroxisomal farnesylated protein; Housekeeping gene, 33kD [Homo sapiens]                                                                    | 11.5 | 10.9 |
| AA800319 | Transcribed sequence with weak similarity to protein ref:NP_085146.1 (H.sapiens) apolipoprotein L, 4 [Homo sapiens]                                                                                                            | 24.3 | 13   |
| AA800344 | Transcribed sequences                                                                                                                                                                                                          | 3.8  | 3.2  |
| AA800456 | Transcribed sequences                                                                                                                                                                                                          | 37   | 32.7 |
| AA800503 | Transcribed sequences                                                                                                                                                                                                          | 28.4 | 29.4 |
| AA800513 | Transcribed sequence with strong similarity to protein ref:NP_003487.1 (H.sapiens) transformation/transcription domain-associated protein [Homo sapiens]                                                                       | 9.6  | 10.2 |
| AA800517 | vesicle associated protein                                                                                                                                                                                                     | 14.2 | 12.4 |
| AA800519 | Transcribed sequences                                                                                                                                                                                                          | 7.8  | 8.4  |
| AA800521 | Transcribed sequence with strong similarity to protein ref:NP_079780.1 (M.musculus) RIKEN cDNA 2310004L02 [Mus musculus]                                                                                                       | 3.3  | 0.8  |
| AA800535 | Transcribed sequence with weak similarity to protein ref:NP_076229.1 (M.musculus) Abl-philin 2 [Mus musculus]                                                                                                                  | 47.3 | 33.6 |
| AA800549 | Transcribed sequences                                                                                                                                                                                                          | 8.4  | 6.2  |
| AA800551 | DnaJ-like protein                                                                                                                                                                                                              | 16.7 | 7.1  |
| AA800566 | Transcribed sequences                                                                                                                                                                                                          | 80   | 18.1 |
| AA800570 | Transcribed sequences                                                                                                                                                                                                          | 16.7 | 8.2  |
| AA800572 | Transcribed sequences                                                                                                                                                                                                          | 74.8 | 28.9 |
| AA800587 | Transcribed sequence with weak similarity to protein sp:P04041 (R.norvegicus) GSHC_RAT Glutathione peroxidase (GSHPX-1) (Cellular glutathione peroxidase)                                                                      | 25.1 | 18.8 |
| AA800592 | Transcribed sequences                                                                                                                                                                                                          | 2    | 0.5  |

|          |                                                                                                                                                                                                                                                                              |      |      |
|----------|------------------------------------------------------------------------------------------------------------------------------------------------------------------------------------------------------------------------------------------------------------------------------|------|------|
| AA800593 | Transcribed sequences                                                                                                                                                                                                                                                        | 6.3  | 6.4  |
| AA800597 | Transcribed sequences                                                                                                                                                                                                                                                        | 30.1 | 22.2 |
| AA800602 | chemokine (C-X3-C motif) ligand 1                                                                                                                                                                                                                                            | 48.5 | 30.1 |
| AA800604 | immediate early response 5                                                                                                                                                                                                                                                   | 82   | 46.8 |
| AA800604 | immediate early response 5                                                                                                                                                                                                                                                   | 37.4 | 11.7 |
| AA800613 | zinc finger protein 36                                                                                                                                                                                                                                                       | 28.7 | 10.6 |
| AA800626 | Transcribed sequences                                                                                                                                                                                                                                                        | 25.5 | 17.5 |
| AA800632 | Transcribed sequence with strong similarity to protein sp:Q9QWV4 (M.musculus) MLF1_MOUSE Myeloid leukemia factor 1 (Myelodysplasia-myeloid leukemia factor 1) (Hematopoietic lineage switch 7)                                                                               | 12.1 | 17.8 |
| AA800637 | Transcribed sequence with strong similarity to protein ref:NP_055330.1 (H.sapiens) CCR4-NOT transcription complex, subunit 2; NOT2 (negative regulator of transcription 2, yeast) homolog [Homo sapiens]                                                                     | 9.3  | 6.9  |
| AA800639 | Transcribed sequences                                                                                                                                                                                                                                                        | 13.9 | 7.1  |
| AA800651 | Transcribed sequences                                                                                                                                                                                                                                                        | 50.5 | 17.7 |
| AA800663 | Transcribed sequence with strong similarity to protein ref:NP_075532.1 (M.musculus) RAN binding protein 16 [Mus musculus]                                                                                                                                                    | 29.2 | 23   |
| AA800671 | Transcribed sequence with moderate similarity to protein sp:Q9JKF1 (M.musculus) IQG1_MOUSE Ras GTPase-activating-like protein IQGAP1                                                                                                                                         | 11.9 | 11.9 |
| AA800673 | Transcribed sequences                                                                                                                                                                                                                                                        | 11.2 | 9.6  |
| AA800678 | Transcribed sequence with weak similarity to protein ref:NP_109622.1 (M.musculus) RIKEN cDNA 0610013D04 gene; NG28 protein [Mus musculus]                                                                                                                                    | 47   | 24.6 |
| AA800678 | Transcribed sequence with weak similarity to protein ref:NP_109622.1 (M.musculus) RIKEN cDNA 0610013D04 gene; NG28 protein [Mus musculus]                                                                                                                                    | 8.6  | 7    |
| AA800679 | nucleostemin                                                                                                                                                                                                                                                                 | 17.4 | 10.7 |
| AA800680 | Transcribed sequence with moderate similarity to protein ref:NP_080256.1 (M.musculus) Notch-regulated ankyrin repeat protein [Mus musculus]                                                                                                                                  | 31.7 | 18.6 |
| AA800684 | Transcribed sequence with moderate similarity to protein sp:P50545 (R.norvegicus) HCK_RAT Tyrosine-protein kinase HCK (P56-HCK) (Hemopoietic cell kinase)                                                                                                                    | 82.1 | 25.8 |
| AA800686 | Transcribed sequence with weak similarity to protein ref:NP_113811.1 (R.norvegicus) growth factor receptor bound protein 14 [Rattus norvegicus]                                                                                                                              | 22.5 | 26   |
| AA800688 | Transcribed sequences                                                                                                                                                                                                                                                        | 9.6  | 7.8  |
| AA800693 | Transcribed sequences                                                                                                                                                                                                                                                        | 35.9 | 26.3 |
| AA800693 | Transcribed sequences                                                                                                                                                                                                                                                        | 13.5 | 12.6 |
| AA800699 | Transcribed sequence with strong similarity to protein ref:NP_116248.1 (H.sapiens) hypothetical protein FLJ14906 [Homo sapiens]                                                                                                                                              | 7.4  | 2.9  |
| AA800701 | Transcribed sequences                                                                                                                                                                                                                                                        | 24.7 | 13.7 |
| AA800703 | granzyme K                                                                                                                                                                                                                                                                   | 4.8  | 3.6  |
| AA800708 | Transcribed sequences                                                                                                                                                                                                                                                        | 10.5 | 11.4 |
| AA800709 | Transcribed sequence with weak similarity to protein ref:NP_035256.1 (M.musculus) palate, lung, and nasal epithelium expressed transcript [Mus musculus]                                                                                                                     | 10.3 | 5.5  |
| AA800711 | Transcribed sequences                                                                                                                                                                                                                                                        | 3.9  | 2.6  |
| AA800712 | Transcribed sequence with strong similarity to protein ref:NP_034570.1 (M.musculus) high mobility group protein 20 B; BRCA2-associated factor 35 [Mus musculus]                                                                                                              | 14.9 | 5.4  |
| AA800717 | Transcribed sequence with strong similarity to protein sp:P25111 (R.norvegicus) RS25_HUMAN 40S ribosomal protein S25                                                                                                                                                         | 31.7 | 24.1 |
| AA800719 | Transcribed sequences                                                                                                                                                                                                                                                        | 48.3 | 25.2 |
| AA800722 | angiotensin 1 converting enzyme 1                                                                                                                                                                                                                                            | 13.9 | 11.9 |
| AA800731 | Transcribed sequences                                                                                                                                                                                                                                                        | 27.2 | 13.9 |
| AA800735 | Transcribed sequence with moderate similarity to protein ref:NP_068506.1 (H.sapiens) supervillin, isoform 2; membrane-associated F-actin binding protein p205; archvillin [Homo sapiens]                                                                                     | 20.4 | 12.1 |
| AA800735 | Transcribed sequence with moderate similarity to protein ref:NP_068506.1 (H.sapiens) supervillin, isoform 2; membrane-associated F-actin binding protein p205; archvillin [Homo sapiens]                                                                                     | 8.6  | 3.9  |
| AA800737 | Transcribed sequence with weak similarity to protein ref:NP_032755.1 (M.musculus) catenin delta 2; neural plakophilin-related arm-repeat protein; catenin (cadherin-associated protein), delta 2 (neural plakophilin-related arm-repeat protein); neurojungin [Mus musculus] | 31.6 | 22.6 |
| AA800738 | HIV-1 Tat interactive protein, 60 kD                                                                                                                                                                                                                                         | 18.2 | 6.5  |
| AA800739 | Transcribed sequence with weak similarity to protein ref:NP_569965.1 (D.melanogaster) EG:39E1.2 gene product [Drosophila melanogaster]                                                                                                                                       | 27   | 14.1 |
| AA800741 | Transcribed sequences                                                                                                                                                                                                                                                        | 3.2  | 1.8  |
| AA800745 | aminolevulinate, delta-, dehydratase                                                                                                                                                                                                                                         | 12.4 | 13.5 |
| AA800748 | transcription factor 21                                                                                                                                                                                                                                                      | 3.5  | 1.1  |
| AA800750 | Transcribed sequence with moderate similarity to protein sp:P11367 (M.musculus) POL3_MOUSE Retrovirus-related POL polyprotein (Endonuclease)                                                                                                                                 | 12.3 | 8.7  |
| AA800753 | Transcribed sequences                                                                                                                                                                                                                                                        | 9.1  | 4.9  |
| AA800754 | Transcribed sequences                                                                                                                                                                                                                                                        | 3.5  | 3.4  |
| AA800763 | Transcribed sequences                                                                                                                                                                                                                                                        | 8.5  | 6.7  |
| AA800768 | Transcribed sequences                                                                                                                                                                                                                                                        | 9.6  | 8.8  |
| AA800770 | Transcribed sequences                                                                                                                                                                                                                                                        | 10.6 | 8.8  |
| AA800771 | Transcribed sequences                                                                                                                                                                                                                                                        | 56.2 | 40.2 |
| AA800772 | Transcribed sequences                                                                                                                                                                                                                                                        | 24.1 | 17.9 |
| AA800782 | Transcribed sequences                                                                                                                                                                                                                                                        | 31.3 | 25.7 |
| AA800784 | cysteine rich protein 61                                                                                                                                                                                                                                                     | 3.2  | 1.9  |
| AA800786 | Transcribed sequences                                                                                                                                                                                                                                                        | 9.2  | 4.8  |
| AA800790 | Transcribed sequences                                                                                                                                                                                                                                                        | 10.9 | 8.4  |
| AA800794 | Transcribed sequence with strong similarity to protein sp:Q13049 (H.sapiens) HT2A_HUMAN Zinc-finger protein HT2A (72 kDa Tat-interacting protein) (Tripartite motif-containing protein 32)                                                                                   | 20.9 | 7.8  |
| AA800795 | Transcribed sequence with weak similarity to protein ref:NP_060327.1 (H.sapiens) slingshot 3 [Homo sapiens]                                                                                                                                                                  | 26.9 | 21   |

|          |                                                                                                                                                                                                            |       |      |
|----------|------------------------------------------------------------------------------------------------------------------------------------------------------------------------------------------------------------|-------|------|
| AA800797 | Transcribed sequence with weak similarity to protein ref:NP_080813.1 (M.musculus) RIKEN cDNA 2310021C19 [Mus musculus]                                                                                     | 14.3  | 12.1 |
| AA800800 | Transcribed sequences                                                                                                                                                                                      | 28.5  | 13.9 |
| AA800803 | Transcribed sequence with weak similarity to protein ref:NP_080827.1 (M.musculus) RIKEN cDNA 6720485C15 [Mus musculus]                                                                                     | 46    | 45   |
| AA800803 | Transcribed sequence with weak similarity to protein ref:NP_080827.1 (M.musculus) RIKEN cDNA 6720485C15 [Mus musculus]                                                                                     | 15.4  | 4.4  |
| AA800817 | Transcribed sequences                                                                                                                                                                                      | 16.5  | 6.8  |
| AA800822 | Transcribed sequences                                                                                                                                                                                      | 37.4  | 37.6 |
| AA800840 | Transcribed sequences                                                                                                                                                                                      | 15.7  | 22.1 |
| AA800840 | Transcribed sequences                                                                                                                                                                                      | 8.8   | 7.8  |
| AA800844 | Transcribed sequence with moderate similarity to protein sp:P16636 (R.norvegicus) LYOX_RAT Protein-lysine 6-oxidase precursor (Lysyl oxidase)                                                              | 24.7  | 16   |
| AA800850 | Transcribed sequences                                                                                                                                                                                      | 23.5  | 13.2 |
| AA800851 | carboxylesterase 3                                                                                                                                                                                         | 131.2 | 94.4 |
| AA800851 | carboxylesterase 3                                                                                                                                                                                         | 2.3   | 0.7  |
| AA800851 | carboxylesterase 3                                                                                                                                                                                         | 1.3   | 0.9  |
| AA800853 | Transcribed sequences                                                                                                                                                                                      | 8.6   | 7.6  |
| AA800853 | Transcribed sequences                                                                                                                                                                                      | 4     | 1.6  |
| AA800855 | Transcribed sequences                                                                                                                                                                                      | 119.9 | 55.7 |
| AA800855 | Transcribed sequences                                                                                                                                                                                      | 19.6  | 15   |
| AA800878 | Transcribed sequences                                                                                                                                                                                      | 10.3  | 4.2  |
| AA800882 | Transcribed sequences                                                                                                                                                                                      | 16.7  | 11.5 |
| AA800882 | Transcribed sequences                                                                                                                                                                                      | 7.4   | 4    |
| AA800885 | Transcribed sequences                                                                                                                                                                                      | 37.8  | 2    |
| AA800898 | Transcribed sequences                                                                                                                                                                                      | 7.9   | 5.4  |
| AA800912 | general transcription factor II I repeat domain-containing 1                                                                                                                                               | 15.2  | 14.8 |
| AA800912 | general transcription factor II I repeat domain-containing 1                                                                                                                                               | 12.6  | 12.6 |
| AA800928 | Transcribed sequence with strong similarity to protein sp:O08810 (M.musculus) U5S1_MOUSE 116 kDa U5 small nuclear ribonucleoprotein component (U5 snRNP-specific protein, 116 kDa) (U5-116 kDa)            | 7.5   | 5.5  |
| AA800930 | Rattus norvegicus cDNA, 3' end /clone=RLUAN25 /clone_end=3' /gb=AA800930 /gi=2863885 /ug=Rn.6669 /len=315                                                                                                  | 8.6   | 2.4  |
| AA800942 | complement component 4a                                                                                                                                                                                    | 14.8  | 4.1  |
| AA800946 | Transcribed sequence with moderate similarity to protein sp:P43330 (H.sapiens) SMD2_HUMAN Small nuclear ribonucleoprotein Sm D2 (snRNP core protein D2) (Sm-D2)                                            | 10    | 4.8  |
| AA800948 | Transcribed sequence with strong similarity to protein ref:NP_071634.1 (R.norvegicus) alpha-tubulin [Rattus norvegicus]                                                                                    | 4.6   | 2.2  |
| AA800962 | Transcribed sequence with strong similarity to protein pir:S11661 (M.musculus) S11661 talin - mouse                                                                                                        | 13.7  | 5    |
| AA800963 | Transcribed sequence with moderate similarity to protein pir:A60716 (R.norvegicus) A60716 somatotropin intron-related protein RDE.25 - rat (fragment)                                                      | 50.4  | 44.1 |
| AA800971 | Transcribed sequences                                                                                                                                                                                      | 13    | 3.7  |
| AA801029 | nuclear receptor subfamily 2, group F, member 6                                                                                                                                                            | 5.5   | 6.9  |
| AA801174 | R.norvegicus mRNA for Ig rearranged mu-chain C region, exons 2-4                                                                                                                                           | 13.8  | 10.6 |
| AA801219 | pancreatic lipase related protein 1                                                                                                                                                                        | 1.4   | 0.9  |
| AA801294 | lectin, galactose binding, soluble 7                                                                                                                                                                       | 1.5   | 0.8  |
| AA817764 | Transcribed sequences                                                                                                                                                                                      | 24.9  | 17.9 |
| AA817843 | nuclear transcription factor - Y beta                                                                                                                                                                      | 24.3  | 7.5  |
| AA817846 | Transcribed sequence with strong similarity to protein sp:P29147 (R.norvegicus) BDH_RAT D-beta-hydroxybutyrate dehydrogenase, mitochondrial precursor (BDH) (3-hydroxybutyrate dehydrogenase)              | 23.4  | 18.6 |
| AA817854 | ceruloplasmin                                                                                                                                                                                              | 8.8   | 9.9  |
| AA817964 | paraoxonase 1                                                                                                                                                                                              | 13    | 4.9  |
| AA817987 | sulfotransferase, hydroxysteroid preferring 2                                                                                                                                                              | 14.4  | 7.1  |
| AA818097 | glucagon-like peptide 1 receptor                                                                                                                                                                           | 14.9  | 11.5 |
| AA818114 | ras-related GTP-binding protein 4b                                                                                                                                                                         | 12.3  | 6.8  |
| AA818122 | sulfotransferase, hydroxysteroid preferring 2                                                                                                                                                              | 4.2   | 2.9  |
| AA818144 | C-reactive protein                                                                                                                                                                                         | 7.4   | 6.8  |
| AA818198 | Transcribed sequences                                                                                                                                                                                      | 2.3   | 1.1  |
| AA818240 | nucleoporin 153kD                                                                                                                                                                                          | 10.1  | 9    |
| AA818403 | Transcribed sequence with moderate similarity to protein pir:S12207 (M.musculus) S12207 hypothetical protein (B2 element) - mouse                                                                          | 11.9  | 8.6  |
| AA818427 | kinesin light chain 1                                                                                                                                                                                      | 2.3   | 0.9  |
| AA818499 | Transcribed sequence with weak similarity to protein ref:NP_570953.1 (M.musculus) CAMP [Mus musculus]                                                                                                      | 44.9  | 31.9 |
| AA818593 | phosphatidate phosphohydrolase type 2a                                                                                                                                                                     | 22.9  | 12.1 |
| AA818593 | phosphatidate phosphohydrolase type 2a                                                                                                                                                                     | 20.1  | 8    |
| AA818604 | heat shock 70kD protein 1A                                                                                                                                                                                 | 4.3   | 3.9  |
| AA818677 | Neurofilament, heavy polypeptide                                                                                                                                                                           | 7.4   | 6.5  |
| AA818894 | proteoglycan peptide core protein                                                                                                                                                                          | 9.1   | 7.1  |
| AA818917 | similar to sp Q02827 N4BM_BOVIN NADH-UBIQUINONE OXIDOREDUCTASE SUBUNIT B14.5B                                                                                                                              | 14    | 10.8 |
| AA818970 | endothelin receptor type B                                                                                                                                                                                 | 1.3   | 0.4  |
| AA818982 | thymopoietin                                                                                                                                                                                               | 15.4  | 10.1 |
| AA818982 | thymopoietin                                                                                                                                                                                               | 3.9   | 3.5  |
| AA818983 | diacylglycerol kinase, beta                                                                                                                                                                                | 7.9   | 9.9  |
| AA819187 | CD38 antigen                                                                                                                                                                                               | 10.1  | 11.9 |
| AA819500 | Transcribed sequence with strong similarity to protein sp:P35249 (H.sapiens) AC12_HUMAN Activator 1 37 kDa subunit (Replication factor C 37 kDa subunit) (A1 37 kDa subunit) (RF-C 37 kDa subunit) (RFC37) | 13.3  | 17.4 |



|          |                                                                                                                                                                                                                |      |      |
|----------|----------------------------------------------------------------------------------------------------------------------------------------------------------------------------------------------------------------|------|------|
| AA819500 | Transcribed sequence with strong similarity to protein sp:P35249 (H.sapiens) AC12_HUMAN Activator 1 37 kDa subunit (Replication factor C 37 kDa subunit) (A1 37 kDa subunit) (RF-C 37 kDa subunit) (RFC37)     | 13.1 | 7.1  |
| AA819643 | Transcribed sequences                                                                                                                                                                                          | 3.8  | 3.2  |
| AA819776 | Rattus norvegicus cDNA clone UI-R-A0-ap-h-07-0-UI 3' similar to gb J04633 MUSHSP86A Mouse heat shock protein 86 mRNA, complete cds, and 28S ribosomal RNA, partial sequence, mRNA sequence [Rattus norvegicus] | 41.4 | 23.3 |
| AA819793 | Flap structure-specific endonuclease 1                                                                                                                                                                         | 24.6 | 13.6 |
| AA819943 | Rat Brain, Stratagene (cat.#936501) Rattus norvegicus cDNA clone pBS/49a-1 3', mRNA sequence [Rattus norvegicus]                                                                                               | 10.6 | 12.6 |
| AA819943 | cDNA clone pBS/49a-1 3', mRNA sequence                                                                                                                                                                         | 4.5  | 2.4  |
| AA848268 | Transcribed sequence with moderate similarity to protein ref:NP_075223.1 (R.norvegicus) DnaJ-like protein [Rattus norvegicus]                                                                                  | 10.2 | 7.9  |
| AA848421 | Transcribed sequence with strong similarity to protein sp:P97931 (M.musculus) UNG_MOUSE Uracil-DNA glycosylase, mitochondrial precursor (UDG)                                                                  | 12.6 | 13   |
| AA848563 | heat shock 70kD protein 1A                                                                                                                                                                                     | 1.8  | 0.3  |
| AA848831 | endothelial differentiation, lysophosphatidic acid G-protein-coupled receptor, 2                                                                                                                               | 14.7 | 11.5 |
| AA849035 | Transcribed sequence with strong similarity to protein pir:TVRTBM (R.norvegicus) TVRTBM transforming protein B-myc - rat                                                                                       | 7.1  | 6.8  |
| AA849036 | guanylate cyclase 1, soluble, alpha 3                                                                                                                                                                          | 17   | 6.1  |
| AA849716 | mitogen-activated protein kinase 12                                                                                                                                                                            | 1.5  | 0.3  |
| AA849722 | proteasome (prosome, macropain) subunit, beta type 1                                                                                                                                                           | 98.9 | 45.8 |
| AA849769 | folistatin-like                                                                                                                                                                                                | 70.9 | 41.2 |
| AA849769 | folistatin-like                                                                                                                                                                                                | 35.8 | 20.9 |
| AA850138 | Rat Ig active lambda2-like chain mRNA, 3' end                                                                                                                                                                  | 35.6 | 27.8 |
| AA850568 | Rattus norvegicus phosphoserine aminotransferase mRNA, complete cds                                                                                                                                            | 7.1  | 3.6  |
| AA850734 | vascular endothelial growth factor                                                                                                                                                                             | 7.2  | 5    |
| AA851223 | enolase 3, beta                                                                                                                                                                                                | 0.7  | 0.5  |
| AA851379 | Transcribed sequence with moderate similarity to protein sp:O00217 (H.sapiens) NUIM_HUMAN NADH-ubiquinone oxidoreductase 23 kDa subunit, mitochondrial precursor (Complex I-23KD) (CI-23KD) (TYKY subunit)     | 48.8 | 56.4 |
| AA851749 | splicing factor, arginine/serine-rich (transformer 2 Drosophila homolog) 10                                                                                                                                    | 16.1 | 9.9  |
| AA851887 | Dynamin 2                                                                                                                                                                                                      | 15   | 6.8  |
| AA852055 | TYRO3 protein tyrosine kinase 3                                                                                                                                                                                | 32.2 | 16.6 |
| AA852056 | Transcribed sequence with moderate similarity to protein ref:NP_001430.1 (H.sapiens) exostoses (multiple)-like 2; Exostoses, multiple, like 2 [Homo sapiens]                                                   | 11.6 | 9.9  |
| AA858510 | prostaglandin E receptor 1                                                                                                                                                                                     | 4.1  | 3.3  |
| AA858520 | folistatin                                                                                                                                                                                                     | 15.5 | 7.6  |
| AA858520 | folistatin                                                                                                                                                                                                     | 4    | 1.1  |
| AA858570 | Transcribed sequences                                                                                                                                                                                          | 7.1  | 5.7  |
| AA858571 | Transcribed sequences                                                                                                                                                                                          | 8.6  | 5.7  |
| AA858572 | Transcribed sequences                                                                                                                                                                                          | 31   | 9.5  |
| AA858573 | spp-24 precursor                                                                                                                                                                                               | 6.8  | 2.7  |
| AA858586 | ribosomal protein L18                                                                                                                                                                                          | 14.1 | 9.5  |
| AA858588 | Transcribed sequences                                                                                                                                                                                          | 12.1 | 6.4  |
| AA858600 | Transcribed sequence with strong similarity to protein ref:NP_080084.1 (M.musculus) leucine-zipper-like transcriptional regulator, 1 [Mus musculus]                                                            | 18.3 | 15.1 |
| AA858603 | Transcribed sequence with weak similarity to protein ref:NP_508799.1 (C.elegans) F16H11.1.p [Caenorhabditis elegans]                                                                                           | 16.2 | 5.2  |
| AA858603 | Transcribed sequence with weak similarity to protein ref:NP_508799.1 (C.elegans) F16H11.1.p [Caenorhabditis elegans]                                                                                           | 12.5 | 6.9  |
| AA858604 | Transcribed sequence                                                                                                                                                                                           | 3.6  | 1.2  |
| AA858605 | Transcribed sequences                                                                                                                                                                                          | 32.3 | 12.1 |
| AA858617 | Transcribed sequences                                                                                                                                                                                          | 60.6 | 11.8 |
| AA858620 | Transcribed sequence with strong similarity to protein sp:O08816 (R.norvegicus) WASL_RAT Neural Wiskott-Aldrich syndrome protein (N-WASP)                                                                      | 7    | 5.6  |
| AA858621 | CaM-kinase II inhibitor alpha                                                                                                                                                                                  | 4.4  | 2.2  |
| AA858621 | CaM-kinase II inhibitor alpha                                                                                                                                                                                  | 2.7  | 0.7  |
| AA858626 | synaptic vesicle glycoprotein 2 b                                                                                                                                                                              | 2.9  | 1.6  |
| AA858630 | Transcribed sequences                                                                                                                                                                                          | 8.7  | 7.1  |
| AA858632 | Transcribed sequences                                                                                                                                                                                          | 3.8  | 1.3  |
| AA858640 | heat shock protein 60 (liver)                                                                                                                                                                                  | 36   | 10.3 |
| AA858641 | Transcribed sequences                                                                                                                                                                                          | 18.8 | 14.3 |
| AA858673 | pancreatic secretory trypsin inhibitor type II (PSTI-II)                                                                                                                                                       | 10.2 | 15.3 |
| AA858977 | Ras-related GTP-binding protein Rab29                                                                                                                                                                          | 7.6  | 5.5  |
| AA859299 | nucleolar phosphoprotein p130                                                                                                                                                                                  | 21.9 | 19.7 |
| AA859468 | Transcribed sequences                                                                                                                                                                                          | 27.9 | 29.3 |
| AA859473 | vesicle-associated membrane protein 5                                                                                                                                                                          | 19.5 | 13.7 |
| AA859474 | Transcribed sequence with strong similarity to protein ref:NP_076303.1 (M.musculus) T-box18; RIKEN cDNA 2810012F10 gene [Mus musculus]                                                                         | 4.5  | 2.7  |
| AA859479 | Transcribed sequences                                                                                                                                                                                          | 15.3 | 8.2  |
| AA859483 | Transcribed sequences                                                                                                                                                                                          | 39.6 | 6.7  |
| AA859495 | Transcribed sequence with weak similarity to protein ref:NP_476460.1 (R.norvegicus) splicing factor, arginine/serine-rich (transformer 2 Drosophila homolog) 10 [Rattus norvegicus]                            | 11.9 | 8.4  |
| AA859495 | Transcribed sequence with weak similarity to protein ref:NP_476460.1 (R.norvegicus) splicing factor, arginine/serine-rich (transformer 2 Drosophila homolog) 10 [Rattus norvegicus]                            | 7.7  | 6.4  |
| AA859496 | GTP cyclohydrolase 1                                                                                                                                                                                           | 12.5 | 7.5  |
| AA859502 | Transcribed sequences                                                                                                                                                                                          | 22.6 | 17.5 |

|          |                                                                                                                                                                                                                    |      |      |
|----------|--------------------------------------------------------------------------------------------------------------------------------------------------------------------------------------------------------------------|------|------|
| AA859508 | Transcribed sequence with moderate similarity to protein pir:I60307 (E. coli) I60307 beta-galactosidase, alpha peptide - Escherichia coli                                                                          | 22.7 | 4.8  |
| AA859509 | Transcribed sequences                                                                                                                                                                                              | 7.7  | 4.5  |
| AA859513 | Transcribed sequences                                                                                                                                                                                              | 8.1  | 5.2  |
| AA859519 | Transcribed sequence with strong similarity to protein sp:Q9WVB0 (M.musculus) RBMS_MOUSE RNA-binding protein with multiple splicing (RBP-MS) (HEart, RRM Expressed Sequence) (Hermes)                              | 63   | 21.7 |
| AA859519 | Transcribed sequence with strong similarity to protein sp:Q9WVB0 (M.musculus) RBMS_MOUSE RNA-binding protein with multiple splicing (RBP-MS) (HEart, RRM Expressed Sequence) (Hermes)                              | 24   | 15.5 |
| AA859520 | Transcribed sequences                                                                                                                                                                                              | 19.6 | 14.7 |
| AA859524 | Transcribed sequences                                                                                                                                                                                              | 20.9 | 10.7 |
| AA859532 | Transcribed sequences                                                                                                                                                                                              | 8.4  | 9.4  |
| AA859533 | Transcribed sequence with moderate similarity to protein sp:O88808 (R.norvegicus) TUB_RAT TUBBY PROTEIN HOMOLOG                                                                                                    | 15.4 | 2.9  |
| AA859543 | Transcribed sequences                                                                                                                                                                                              | 4.1  | 2.3  |
| AA859549 | Transcribed sequence with weak similarity to protein ref:NP_492850.1 (C.elegans) F49D11.9.p [Caenorhabditis elegans]                                                                                               | 14   | 9.3  |
| AA859552 | Transcribed sequence with moderate similarity to protein sp:P70531 (R.norvegicus) EF2K_RAT ELONGATION FACTOR 2 KINASE (EEF-2 KINASE) (EEF-2K) (CALCIUM/CALMODULIN-DEPENDENT EUKARYOTIC ELONGATION FACTOR-2 KINASE) | 22.1 | 15.5 |
| AA859553 | Transcribed sequence with weak similarity to protein ref:NP_446073.1 (R.norvegicus) activin receptor interacting protein 1 [Rattus norvegicus]                                                                     | 8.8  | 8.1  |
| AA859561 | Transcribed sequence with strong similarity to protein ref:NP_057583.1 (H.sapiens) HSPC244 [Homo sapiens]                                                                                                          | 2.8  | 0.7  |
| AA859562 | Transcribed sequences                                                                                                                                                                                              | 4.4  | 4.2  |
| AA859565 | Transcribed sequence with moderate similarity to protein ref:NP_056517.1 (H.sapiens) hypothetical protein CL25022 [Homo sapiens]                                                                                   | 4.3  | 2.8  |
| AA859577 | Transcribed sequences                                                                                                                                                                                              | 32.9 | 16.2 |
| AA859578 | proprotein convertase subtilisin/kexin type 5                                                                                                                                                                      | 3.3  | 2.8  |
| AA859581 | late gestation lung protein 1                                                                                                                                                                                      | 9.5  | 9.5  |
| AA859584 | calcium channel, voltage-dependent, T type, alpha 1H subunit                                                                                                                                                       | 6.1  | 6.5  |
| AA859585 | Transcribed sequences                                                                                                                                                                                              | 17.8 | 7.1  |
| AA859589 | Transcribed sequences                                                                                                                                                                                              | 15.4 | 14.8 |
| AA859593 | Transcribed sequence with moderate similarity to protein pdb:1LBG (E. coli) B Chain B, Lactose Operon Repressor Bound To 21-Base Pair Symmetric Operator Dna, Alpha Carbons Only                                   | 18.2 | 22.8 |
| AA859597 | Transcribed sequences                                                                                                                                                                                              | 13.8 | 4    |
| AA859612 | Transcribed sequences                                                                                                                                                                                              | 27.8 | 29.3 |
| AA859612 | Transcribed sequences                                                                                                                                                                                              | 9.5  | 7.4  |
| AA859627 | Transcribed sequences                                                                                                                                                                                              | 10.9 | 8.7  |
| AA859631 | Transcribed sequence with weak similarity to protein sp:Q9Z2K3 (R.norvegicus) ZF94_RAT Zinc finger protein 94 (Zfp-94) (Zinc finger protein Y1) (RLZF-Y)                                                           | 4.2  | 2.1  |
| AA859632 | Transcribed sequences                                                                                                                                                                                              | 21.5 | 9    |
| AA859633 | Transcribed sequences                                                                                                                                                                                              | 50.8 | 19.6 |
| AA859633 | Transcribed sequences                                                                                                                                                                                              | 27.2 | 6.3  |
| AA859643 | Transcribed sequences                                                                                                                                                                                              | 51.8 | 29.9 |
| AA859648 | Transcribed sequence with weak similarity to protein ref:NP_114468.1 (R.norvegicus) DnaJ (Hsp40) homolog, subfamily A, member 2 [Rattus norvegicus]                                                                | 61.9 | 24.5 |
| AA859652 | Transcribed sequences                                                                                                                                                                                              | 10.9 | 9.7  |
| AA859661 | Transcribed sequence with moderate similarity to protein pir:I37421 (H.sapiens) I37421 glutaminyl-peptide cyclotransferase (EC 2.3.2.5) - human                                                                    | 3.8  | 2.4  |
| AA859662 | Transcribed sequence with weak similarity to protein sp:Q9Z143 (R.norvegicus) SM4F_RAT Semaphorin 4F precursor (Semaphorin W) (Sema W)                                                                             | 10.4 | 2.7  |
| AA859663 | Transcribed sequence with weak similarity to protein ref:NP_080153.1 (M.musculus) RIKEN cDNA 2310067G05 [Mus musculus]                                                                                             | 8.6  | 4.1  |
| AA859665 | nuclear pore associated protein                                                                                                                                                                                    | 65.6 | 21.3 |
| AA859666 | solute carrier family 25 (mitochondrial carrier; dicarboxylate transporter), member 10                                                                                                                             | 25.2 | 23.3 |
| AA859667 | Transcribed sequences                                                                                                                                                                                              | 59.2 | 10.3 |
| AA859672 | Transcribed sequence with strong similarity to protein ref:NP_076941.1 (H.sapiens) hypothetical protein MGC3103 [Homo sapiens]                                                                                     | 88.5 | 49   |
| AA859672 | Transcribed sequence with strong similarity to protein ref:NP_076941.1 (H.sapiens) hypothetical protein MGC3103 [Homo sapiens]                                                                                     | 8.2  | 8.4  |
| AA859673 | Transcribed sequences                                                                                                                                                                                              | 3.6  | 1.4  |
| AA859687 | Transcribed sequences                                                                                                                                                                                              | 23.4 | 20.2 |
| AA859690 | Transcribed sequences                                                                                                                                                                                              | 28.6 | 10.8 |
| AA859693 | Transcribed sequence with moderate similarity to protein ref:NP_060680.1 (H.sapiens) hypothetical protein FLJ10769 [Homo sapiens]                                                                                  | 41   | 18.6 |
| AA859694 | Transcribed sequence with weak similarity to protein pir:DDRT (R.norvegicus) DDRT helix-destabilizing protein - rat                                                                                                | 31.9 | 25.6 |
| AA859694 | Transcribed sequence with weak similarity to protein pir:DDRT (R.norvegicus) DDRT helix-destabilizing protein - rat                                                                                                | 24   | 13.9 |
| AA859700 | Transcribed sequence with moderate similarity to protein sp:P51175 (M.musculus) PPOX_MOUSE PROTOPORPHYRINOGEN OXIDASE (PPO)                                                                                        | 15.6 | 10.3 |
| AA859700 | Transcribed sequence with moderate similarity to protein sp:P51175 (M.musculus) PPOX_MOUSE PROTOPORPHYRINOGEN OXIDASE (PPO)                                                                                        | 6.7  | 4.8  |
| AA859701 | Transcribed sequences                                                                                                                                                                                              | 27.5 | 23.4 |
| AA859719 | Transcribed sequences                                                                                                                                                                                              | 11.1 | 12.4 |
| AA859722 | Transcribed sequences                                                                                                                                                                                              | 7.8  | 1.5  |
| AA859725 | Transcribed sequences                                                                                                                                                                                              | 13.9 | 14.4 |
| AA859740 | Transcribed sequence with moderate similarity to protein pir:I60307 (E. coli) I60307 beta-galactosidase, alpha peptide - Escherichia coli                                                                          | 15.9 | 18.2 |

|          |                                                                                                                                                                                                       |       |      |
|----------|-------------------------------------------------------------------------------------------------------------------------------------------------------------------------------------------------------|-------|------|
| AA859744 | Transcribed sequences                                                                                                                                                                                 | 7.5   | 2.3  |
| AA859752 | Noggin                                                                                                                                                                                                | 2.3   | 1.1  |
| AA859757 | collagen, type V, alpha 1                                                                                                                                                                             | 17.7  | 14.4 |
| AA859760 | Transcribed sequences                                                                                                                                                                                 | 24.2  | 14.2 |
| AA859768 | Transcribed sequences                                                                                                                                                                                 | 21.9  | 7.5  |
| AA859776 | Transcribed sequence with weak similarity to protein ref:NP_476473.1 (R.norvegicus) p135ras-related homolog A2 [Rattus norvegicus]                                                                    | 9.9   | 9.7  |
| AA859777 | Transcribed sequences                                                                                                                                                                                 | 24.4  | 14.1 |
| AA859788 | Transcribed sequence with strong similarity to protein ref:NP_080774.1 (M.musculus) mitochondrial ribosomal protein S11 [Mus musculus]                                                                | 8.9   | 6.1  |
| AA859805 | Transcribed sequence with moderate similarity to protein sp:P16636 (R.norvegicus) LYOX_RAT Protein-lysine 6-oxidase precursor (Lysyl oxidase)                                                         | 6.5   | 2.6  |
| AA859820 | Transcribed sequence with strong similarity to protein ref:NP_080023.1 (M.musculus) RIKEN cDNA 4933411K20 [Mus musculus]                                                                              | 7.7   | 7.7  |
| AA859827 | uridine-cytidine kinase 2                                                                                                                                                                             | 11.4  | 10.5 |
| AA859828 | Transcribed sequences                                                                                                                                                                                 | 9     | 6.8  |
| AA859829 | Transcribed sequence with strong similarity to protein ref:NP_067475.1 (M.musculus) erythroblast macrophage protein [Mus musculus]                                                                    | 34    | 25.4 |
| AA859830 | biglycan                                                                                                                                                                                              | 34.1  | 27.3 |
| AA859832 | Transcribed sequences                                                                                                                                                                                 | 41.4  | 8.3  |
| AA859834 | Transcribed sequence with strong similarity to protein ref:NP_080677.1 (M.musculus) mitochondrial ribosomal protein 63 [Mus musculus]                                                                 | 43    | 18.1 |
| AA859835 | Transcribed sequences                                                                                                                                                                                 | 17.7  | 14.2 |
| AA859835 | Transcribed sequences                                                                                                                                                                                 | 7.1   | 3.1  |
| AA859870 | Transcribed sequences                                                                                                                                                                                 | 9.4   | 5.2  |
| AA859878 | Transcribed sequences                                                                                                                                                                                 | 7.5   | 6.7  |
| AA859882 | ubiquitin carboxy-terminal hydrolase L1                                                                                                                                                               | 3.9   | 2.4  |
| AA859884 | Transcribed sequences                                                                                                                                                                                 | 12.2  | 12   |
| AA859885 | Transcribed sequences                                                                                                                                                                                 | 29.2  | 14.9 |
| AA859889 | Transcribed sequences                                                                                                                                                                                 | 5     | 2.2  |
| AA859898 | Transcribed sequence with weak similarity to protein ref:NP_081363.1 (M.musculus) RIKEN cDNA 2300006N05 [Mus musculus]                                                                                | 38.9  | 15.7 |
| AA859899 | alpha-2 antiplasmin                                                                                                                                                                                   | 12.3  | 8.8  |
| AA859902 | Transcribed sequences                                                                                                                                                                                 | 3.8   | 4.6  |
| AA859909 | Transcribed sequences                                                                                                                                                                                 | 38.4  | 40.4 |
| AA859911 | sialyltransferase 5                                                                                                                                                                                   | 42.8  | 27.4 |
| AA859911 | sialyltransferase 5                                                                                                                                                                                   | 30.9  | 13.1 |
| AA859916 | Transcribed sequences                                                                                                                                                                                 | 6.4   | 5    |
| AA859920 | Transcribed sequences                                                                                                                                                                                 | 27.4  | 14.3 |
| AA859921 | Transcribed sequences                                                                                                                                                                                 | 62.7  | 30.2 |
| AA859922 | Transcribed sequences                                                                                                                                                                                 | 31.7  | 18.3 |
| AA859926 | Transcribed sequence with weak similarity to protein pir:A54803 (M.musculus) A54803 microtubule-associated motor KIF4 - mouse                                                                         | 15.2  | 7.2  |
| AA859927 | Transcribed sequence with weak similarity to protein sp:O09112 (M.musculus) DUS8_MOUSE Dual specificity protein phosphatase 8 (Neuronal tyrosine threonine phosphatase 1)                             | 7.2   | 1.7  |
| AA859928 | Transcribed sequences                                                                                                                                                                                 | 3     | 1.6  |
| AA859931 | Transcribed sequence with moderate similarity to protein ref:NP_076974.1 (H.sapiens) hypothetical protein MGC2749 [Homo sapiens]                                                                      | 13.7  | 9.4  |
| AA859931 | Transcribed sequence with moderate similarity to protein ref:NP_076974.1 (H.sapiens) hypothetical protein MGC2749 [Homo sapiens]                                                                      | 8.9   | 5.5  |
| AA859933 | Transcribed sequences                                                                                                                                                                                 | 28.5  | 11.5 |
| AA859933 | Transcribed sequences                                                                                                                                                                                 | 9.2   | 11   |
| AA859934 | Transcribed sequence with weak similarity to protein ref:NP_036831.2 (R.norvegicus) DnaJ (Hsp40) homolog, subfamily B, member 9; Microvascular endothelial differentiation gene 1 [Rattus norvegicus] | 15.4  | 9.6  |
| AA859937 | Transcribed sequences                                                                                                                                                                                 | 26.3  | 16.9 |
| AA859948 | Transcribed sequences                                                                                                                                                                                 | 22.4  | 17.8 |
| AA859951 | Transcribed sequences                                                                                                                                                                                 | 12.7  | 16.5 |
| AA859952 | Transcribed sequence with weak similarity to protein ref:NP_113835.1 (R.norvegicus) Scm-related gene containing four mbt domains [Rattus norvegicus]                                                  | 60.7  | 30.4 |
| AA859966 | Transcribed sequences                                                                                                                                                                                 | 117   | 52.1 |
| AA859966 | Transcribed sequences                                                                                                                                                                                 | 114.9 | 50.2 |
| AA859967 | Rgc32 protein                                                                                                                                                                                         | 21.3  | 13.2 |
| AA859975 | 2-oxoglutarate carrier                                                                                                                                                                                | 16.8  | 8.1  |
| AA859976 | Transcribed sequence with strong similarity to protein sp:P70284 (M.musculus) TGIF_MOUSE 5'-TG-3' INTERACTING FACTOR (HOMEODOMAIN PROTEIN TGIF)                                                       | 12.8  | 6.6  |
| AA859977 | Rattus norvegicus heat shock protein 90 beta mRNA, partial sequence                                                                                                                                   | 36.6  | 11   |
| AA859980 | T-complex 1                                                                                                                                                                                           | 42.7  | 21.7 |
| AA859980 | T-complex 1                                                                                                                                                                                           | 9.9   | 10.2 |
| AA859981 | inositol (myo)-1(or 4)-monophosphatase 2                                                                                                                                                              | 15.3  | 8.8  |
| AA859982 | Transcribed sequences                                                                                                                                                                                 | 15.1  | 10.6 |
| AA859983 | Transcribed sequence with weak similarity to protein pir:T50607 (H.sapiens) T50607 hypothetical protein DKFZp434i1016.1 - human (fragment)                                                            | 33.5  | 21.7 |
| AA859983 | Transcribed sequence with weak similarity to protein pir:T50607 (H.sapiens) T50607 hypothetical protein DKFZp434i1016.1 - human (fragment)                                                            | 17.5  | 14.3 |
| AA859990 | Transcribed sequence with moderate similarity to protein ref:NP_033421.1 (M.musculus) tumor necrosis factor induced protein 1 [Mus musculus]                                                          | 43.5  | 24.2 |
| AA859992 | erythroid differentiation gene 1                                                                                                                                                                      | 22.1  | 15   |
| AA859994 | Transcribed sequence with moderate similarity to protein pir:I60307 (E. coli) I60307 beta-galactosidase, alpha peptide - Escherichia coli                                                             | 17.9  | 13.9 |

|          |                                                                                                                                                                                  |       |       |
|----------|----------------------------------------------------------------------------------------------------------------------------------------------------------------------------------|-------|-------|
| AA859996 | Transcribed sequences                                                                                                                                                            | 34.1  | 16.2  |
| AA859996 | Transcribed sequences                                                                                                                                                            | 29.6  | 21    |
| AA860010 | Transcribed sequences                                                                                                                                                            | 48.7  | 16.7  |
| AA860014 | Transcribed sequence with moderate similarity to protein prf:2206405A (R.norvegicus) 2206405A hemoglobin:SUBUNIT=zeta [Rattus norvegicus]                                        | 95.3  | 141.3 |
| AA860014 | Transcribed sequence with moderate similarity to protein prf:2206405A (R.norvegicus) 2206405A hemoglobin:SUBUNIT=zeta [Rattus norvegicus]                                        | 21.4  | 16.2  |
| AA860015 | Transcribed sequence with weak similarity to protein pir:T50607 (H.sapiens) T50607 hypothetical protein DKFZp434i1016.1 - human (fragment)                                       | 13    | 7.5   |
| AA860017 | Transcribed sequences                                                                                                                                                            | 38    | 10.1  |
| AA860020 | abl-interactor 2                                                                                                                                                                 | 7.3   | 4.1   |
| AA860029 | Transcribed sequences                                                                                                                                                            | 22.4  | 11.6  |
| AA860039 | Transcribed sequence                                                                                                                                                             | 83.1  | 63.9  |
| AA860039 | Transcribed sequence                                                                                                                                                             | 10.8  | 9.7   |
| AA860043 | guanine nucleotide binding protein gamma subunit 11                                                                                                                              | 13.4  | 10.9  |
| AA860044 | Transcribed sequences                                                                                                                                                            | 28.1  | 12.7  |
| AA860047 | Transcribed sequences                                                                                                                                                            | 7.5   | 5.4   |
| AA860049 | Transcribed sequence with strong similarity to protein pdb:1BGM (E. coli) O Chain O, Beta-Galactosidase (Chains I-P)                                                             | 8     | 5.4   |
| AA860055 | Transcribed sequence with moderate similarity to protein ref:NP_079817.1 (M.musculus) RIKEN cDNA 2310079C17 [Mus musculus]                                                       | 5.5   | 7     |
| AA860057 | Transcribed sequences                                                                                                                                                            | 19.8  | 10.2  |
| AA860062 | Albumin                                                                                                                                                                          | 20.7  | 9.3   |
| AA860062 | Albumin                                                                                                                                                                          | 11.6  | 10.5  |
| AA866221 | Transcribed sequences                                                                                                                                                            | 10.6  | 6.4   |
| AA866223 | Transcribed sequences                                                                                                                                                            | 34.1  | 21.9  |
| AA866231 | Transcribed sequences                                                                                                                                                            | 5.5   | 2.4   |
| AA866233 | Transcribed sequences                                                                                                                                                            | 5.8   | 4.1   |
| AA866237 | Albumin                                                                                                                                                                          | 4.5   | 3.2   |
| AA866238 | hyperpolarization-activated, cyclic nucleotide-gated potassium channel 1 (HCN1)                                                                                                  | 4.5   | 1.7   |
| AA866250 | Transcribed sequence with weak similarity to protein pir:JC4667 (M.musculus) JC4667 TB2/DP1 protein homolog - mouse                                                              | 65.8  | 24.3  |
| AA866259 | Transcribed sequences                                                                                                                                                            | 7.6   | 4.1   |
| AA866264 | Transcribed sequence with weak similarity to protein sp:P51652 (R.norvegicus) PE2R_RAT 20-alpha-hydroxysteroid dehydrogenase (20-alpha-HSD) (HSD1)                               | 8.1   | 6.7   |
| AA866265 | Transcribed sequences                                                                                                                                                            | 28.3  | 21.1  |
| AA866269 | Transcribed sequences                                                                                                                                                            | 2.7   | 0.7   |
| AA866272 | Transcribed sequence with moderate similarity to protein ref:NP_065104.1 (H.sapiens) cell death regulator aven; programmed cell death 12 [Homo sapiens]                          | 23.1  | 24.3  |
| AA866290 | Transcribed sequences                                                                                                                                                            | 13.8  | 12.5  |
| AA866291 | Transcribed sequence with strong similarity to protein sp:O35089 (M.musculus) CNIL_MOUSE CORNICHON-LIKE PROTEIN                                                                  | 14.4  | 10.8  |
| AA866293 | Transcribed sequence                                                                                                                                                             | 19    | 10.9  |
| AA866294 | Transcribed sequence with weak similarity to protein ref:NP_065728.1 (H.sapiens) HSCARG protein [Homo sapiens]                                                                   | 22.7  | 14    |
| AA866299 | Transcribed sequences                                                                                                                                                            | 27.9  | 5     |
| AA866299 | Transcribed sequences                                                                                                                                                            | 27.5  | 25.1  |
| AA866302 | 4-hydroxyphenylpyruvic acid dioxygenase                                                                                                                                          | 6.4   | 2.7   |
| AA866302 | 4-hydroxyphenylpyruvic acid dioxygenase                                                                                                                                          | 3.7   | 1.9   |
| AA866306 | Transcribed sequences                                                                                                                                                            | 37.5  | 23.1  |
| AA866321 | Transcribed sequences                                                                                                                                                            | 35.1  | 17.1  |
| AA866345 | Transcribed sequences                                                                                                                                                            | 16.3  | 12.1  |
| AA866357 | Transcribed sequences                                                                                                                                                            | 3.2   | 1.8   |
| AA866358 | Transcribed sequences                                                                                                                                                            | 7.5   | 3.8   |
| AA866369 | Transcribed sequences                                                                                                                                                            | 15.4  | 10.9  |
| AA866371 | Transcribed sequence with moderate similarity to protein pdb:1LBG (E. coli) B Chain B, Lactose Operon Repressor Bound To 21-Base Pair Symmetric Operator Dna, Alpha Carbons Only | 70.1  | 37    |
| AA866383 | Transcribed sequences                                                                                                                                                            | 7.1   | 7.5   |
| AA866391 | Transcribed sequences                                                                                                                                                            | 21.2  | 6.4   |
| AA866404 | Transcribed sequence with weak similarity to protein pdb:1E6W (R.norvegicus) B Chain B, Rat Brain 3-Hydroxyacyl-CoA Dehydrogenase Binary Complex With Nadh And Estradiol         | 16.4  | 6.4   |
| AA866409 | Transcribed sequences                                                                                                                                                            | 37.2  | 11.8  |
| AA866411 | Transcribed sequence with strong similarity to protein sp:P25233 (M.musculus) NECD_MOUSE Necdin                                                                                  | 3.6   | 2.2   |
| AA866414 | solute carrier family 4, member 1                                                                                                                                                | 47.2  | 19.1  |
| AA866419 | Transcribed sequences                                                                                                                                                            | 38.5  | 11.3  |
| AA866425 | Transcribed sequence with moderate similarity to protein ref:NP_080936.1 (M.musculus) RIKEN cDNA 0610009O03 [Mus musculus]                                                       | 22    | 17.3  |
| AA866426 | Transcribed sequences                                                                                                                                                            | 10.9  | 10.9  |
| AA866432 | Transcribed sequences                                                                                                                                                            | 47.4  | 13.6  |
| AA866435 | Transcribed sequence                                                                                                                                                             | 19.1  | 16.3  |
| AA866439 | Transcribed sequences                                                                                                                                                            | 110.1 | 71.5  |
| AA866444 | Transcribed sequence with weak similarity to protein ref:NP_062100.1 (R.norvegicus) intersectin (SH3 domain protein 1A) [Rattus norvegicus]                                      | 28.8  | 20.5  |
| AA866452 | actin alpha cardiac 1                                                                                                                                                            | 7.4   | 5.2   |
| AA866454 | procollagen, type I, alpha 2                                                                                                                                                     | 22    | 14    |
| AA866455 | homeodomain-interacting protein kinase 3                                                                                                                                         | 5.8   | 1.4   |
| AA866455 | homeodomain-interacting protein kinase 3                                                                                                                                         | 2.5   | 1.4   |
| AA866466 | Keratin 8                                                                                                                                                                        | 9.2   | 9.2   |
| AA866471 | Transcribed sequences                                                                                                                                                            | 23.9  | 12    |

|          |                                                                                                                                                                                                         |       |       |
|----------|---------------------------------------------------------------------------------------------------------------------------------------------------------------------------------------------------------|-------|-------|
| AA866482 | Transcribed sequence with strong similarity to protein sp:P52734 (M.musculus) FGD1_MOUSE Putative Rho/Rac guanine nucleotide exchange factor (Rho/Rac GEF) (Faciogenital dysplasia protein homolog)     | 14.8  | 7.9   |
| AA866489 | Transcribed sequences                                                                                                                                                                                   | 8.1   | 10.1  |
| AA874791 | Transcribed sequences                                                                                                                                                                                   | 45.3  | 26.4  |
| AA874794 | nerve growth factor receptor (TNFRSF16) associated protein 1                                                                                                                                            | 44    | 18.2  |
| AA874794 | nerve growth factor receptor (TNFRSF16) associated protein 1                                                                                                                                            | 18.1  | 12.1  |
| AA874797 | Transcribed sequences                                                                                                                                                                                   | 4.8   | 2.4   |
| AA874802 | Histone H1-0                                                                                                                                                                                            | 33.5  | 13.1  |
| AA874803 | Transcribed sequences                                                                                                                                                                                   | 19.9  | 13.6  |
| AA874803 | Transcribed sequences                                                                                                                                                                                   | 3.2   | 0.9   |
| AA874805 | Transcribed sequences                                                                                                                                                                                   | 3.9   | 1.2   |
| AA874809 | Transcribed sequences                                                                                                                                                                                   | 23.5  | 13.8  |
| AA874813 | mitofusin 2                                                                                                                                                                                             | 42.9  | 21.9  |
| AA874815 | Transcribed sequences                                                                                                                                                                                   | 18.3  | 17.5  |
| AA874830 | growth arrest specific 6                                                                                                                                                                                | 147.3 | 46    |
| AA874832 | Transcribed sequence with moderate similarity to protein ref:NP_057321.1 (H.sapiens) anaphase-promoting complex subunit 5 [Homo sapiens]                                                                | 71.7  | 18.2  |
| AA874838 | Transcribed sequences                                                                                                                                                                                   | 16.8  | 3.8   |
| AA874839 | Transcribed sequence with moderate similarity to protein ref:NP_060633.1 (H.sapiens) hypothetical protein FLJ10634 [Homo sapiens]                                                                       | 6.4   | 8.1   |
| AA874842 | Transcribed sequences                                                                                                                                                                                   | 40.6  | 23.6  |
| AA874843 | scavenger receptor class B, member 1                                                                                                                                                                    | 208.5 | 106.8 |
| AA874848 | Thymus cell surface antigen                                                                                                                                                                             | 13.1  | 15.2  |
| AA874849 | Transcribed sequences                                                                                                                                                                                   | 16.4  | 10.3  |
| AA874855 | actin, beta                                                                                                                                                                                             | 16.7  | 9.1   |
| AA874856 | Transcribed sequences                                                                                                                                                                                   | 5.2   | 6.7   |
| AA874857 | Transcribed sequence with strong similarity to protein ref:NP_035351.1 (M.musculus) purine rich element binding protein B [Mus musculus]                                                                | 22.5  | 7     |
| AA874859 | Transcribed sequences                                                                                                                                                                                   | 14    | 8.6   |
| AA874870 | Transcribed sequence with strong similarity to protein pir:A54691 (M.musculus) A54691 octamer-binding protein NonO - mouse                                                                              | 9     | 2.9   |
| AA874873 | Transcribed sequences                                                                                                                                                                                   | 30.3  | 11    |
| AA874873 | Transcribed sequences                                                                                                                                                                                   | 19.5  | 17.1  |
| AA874875 | Transcribed sequences                                                                                                                                                                                   | 12.5  | 10.5  |
| AA874876 | Transcribed sequences                                                                                                                                                                                   | 37.8  | 22.8  |
| AA874877 | Transcribed sequences                                                                                                                                                                                   | 19    | 12    |
| AA874877 | Transcribed sequences                                                                                                                                                                                   | 6     | 9.3   |
| AA874881 | Transcribed sequence with strong similarity to protein ref:NP_073172.1 (R.norvegicus) activity-dependent neuroprotective protein [Rattus norvegicus]                                                    | 16.1  | 29.1  |
| AA874887 | Transcribed sequence with weak similarity to protein ref:NP_113871.1 (R.norvegicus) segregation of mitotic chromosomes b; SMC (segregation of mitotic chromosomes 1)-like 1 (yeast) [Rattus norvegicus] | 8     | 5.8   |
| AA874889 | Transcribed sequences                                                                                                                                                                                   | 47.9  | 22.1  |
| AA874889 | Transcribed sequences                                                                                                                                                                                   | 32.8  | 13    |
| AA874896 | Transcribed sequence with weak similarity to protein ref:NP_496137.1 (C.elegans) acid phosphatase [Caenorhabditis elegans]                                                                              | 12.5  | 10.4  |
| AA874897 | Transcribed sequences                                                                                                                                                                                   | 31    | 19.8  |
| AA874906 | Transcribed sequences                                                                                                                                                                                   | 18.4  | 9.3   |
| AA874912 | Transcribed sequences                                                                                                                                                                                   | 7.9   | 6.2   |
| AA874918 | PAK-interacting exchange factor beta                                                                                                                                                                    | 8.6   | 5.6   |
| AA874919 | mismatch repair protein                                                                                                                                                                                 | 4.4   | 3.3   |
| AA874919 | mismatch repair protein                                                                                                                                                                                 | 2.5   | 1.4   |
| AA874927 | Transcribed sequences                                                                                                                                                                                   | 41.9  | 18    |
| AA874927 | Transcribed sequences                                                                                                                                                                                   | 40.8  | 16.6  |
| AA874928 | Transcribed sequence with strong similarity to protein ref:NP_542124.1 (M.musculus) sorting nexin 4 [Mus musculus]                                                                                      | 10.1  | 7     |
| AA874934 | Transcribed sequences                                                                                                                                                                                   | 58    | 80.6  |
| AA874943 | Transcribed sequence with strong similarity to protein ref:NP_080790.1 (M.musculus) RIKEN cDNA 3200001F04 [Mus musculus]                                                                                | 16.3  | 11.1  |
| AA874944 | Transcribed sequence with weak similarity to protein ref:NP_445966.1 (R.norvegicus) lin-7-Ba [Rattus norvegicus]                                                                                        | 24.5  | 14.3  |
| AA874951 | Transcribed sequence with moderate similarity to protein ref:NP_291081.1 (M.musculus) amnionless [Mus musculus]                                                                                         | 7.5   | 3.8   |
| AA874955 | clathrin, light polypeptide (Lcb)                                                                                                                                                                       | 30.2  | 14.8  |
| AA874968 | Transcribed sequences                                                                                                                                                                                   | 4.9   | 7.2   |
| AA874969 | Rat PMSG-induced ovarian mRNA, 3'sequence, N1                                                                                                                                                           | 42.3  | 27.1  |
| AA874978 | Transcribed sequences                                                                                                                                                                                   | 50.4  | 10.1  |
| AA874982 | Transcribed sequence with moderate similarity to protein pdb:1LBG (E. coli) B Chain B, Lactose Operon Repressor Bound To 21-Base Pair Symmetric Operator Dna, Alpha Carbons Only                        | 10.9  | 5.1   |
| AA874984 | Transcribed sequences                                                                                                                                                                                   | 2.5   | 1.4   |
| AA874993 | Transcribed sequences                                                                                                                                                                                   | 88.3  | 41.1  |
| AA874995 | Transcribed sequences                                                                                                                                                                                   | 26    | 20.4  |
| AA875001 | Transcribed sequence with strong similarity to protein ref:NP_444330.1 (M.musculus) tripartite motif protein 8; ring finger protein 27 [Mus musculus]                                                   | 53.1  | 23.3  |
| AA875002 | Transcribed sequences                                                                                                                                                                                   | 10.4  | 5.9   |
| AA875010 | Transcribed sequences                                                                                                                                                                                   | 19.8  | 13.7  |
| AA875017 | Transcribed sequences                                                                                                                                                                                   | 67.2  | 16.7  |

|          |                                                                                                                                                                                                                                            |      |      |
|----------|--------------------------------------------------------------------------------------------------------------------------------------------------------------------------------------------------------------------------------------------|------|------|
| AA875019 | Transcribed sequence with strong similarity to protein sp:Q9R0I7 (M.musculus) ZAP3_MOUSE Nuclear protein ZAP3                                                                                                                              | 41.7 | 7.2  |
| AA875019 | Transcribed sequence with strong similarity to protein sp:Q9R0I7 (M.musculus) ZAP3_MOUSE Nuclear protein ZAP3                                                                                                                              | 16.2 | 5.7  |
| AA875023 | Transcribed sequences                                                                                                                                                                                                                      | 56.3 | 11.6 |
| AA875025 | Transcribed sequence with strong similarity to protein sp:P02695 (R.norvegicus) RET3_MOUSE Retinoic acid binding protein I, cellular (CRABP-I)                                                                                             | 9.4  | 8    |
| AA875027 | Transcribed sequence with strong similarity to protein pdb:1BGM (E. coli) O Chain O, Beta-Galactosidase (Chains I-P)                                                                                                                       | 9.3  | 7.9  |
| AA875028 | Transcribed sequence with weak similarity to protein pir:JC5110 (R.norvegicus) JC5110 cyclin-dependent kinase-related protein 1a - rat                                                                                                     | 14.7 | 6.7  |
| AA875028 | Transcribed sequence with weak similarity to protein pir:JC5110 (R.norvegicus) JC5110 cyclin-dependent kinase-related protein 1a - rat                                                                                                     | 12.1 | 10.4 |
| AA875033 | fibulin 5                                                                                                                                                                                                                                  | 6.8  | 6.7  |
| AA875035 | solute carrier family 4, member 1                                                                                                                                                                                                          | 30.8 | 9.7  |
| AA875037 | Transcribed sequence with weak similarity to protein ref:NP_067728.1 (R.norvegicus) plasminogen activator inhibitor 2 type A [Rattus norvegicus]                                                                                           | 14   | 10.6 |
| AA875040 | Transcribed sequence with weak similarity to protein ref:NP_113653.1 (H.sapiens) hypothetical protein MGC13204 [Homo sapiens]                                                                                                              | 15.4 | 16.8 |
| AA875041 | PSD-Zip70                                                                                                                                                                                                                                  | 12   | 8.2  |
| AA875045 | Transcribed sequence with strong similarity to protein sp:O55057 (M.musculus) CNRD_MOUSE Retinal rod rhodopsin-sensitive cGMP 3',5'-cyclic phosphodiesterase delta-subunit (GMP-PDE delta)                                                 | 21.6 | 13.2 |
| AA875050 | Transcribed sequence with weak similarity to protein sp:O54783 (R.norvegicus) KICE_RAT Choline/ethanolamine kinase [Includes: Choline kinase (CK); Ethanolamine kinase (EK)]                                                               | 38.2 | 21   |
| AA875054 | T-complex 1                                                                                                                                                                                                                                | 24.1 | 17.8 |
| AA875060 | Transcribed sequences                                                                                                                                                                                                                      | 1.9  | 0.5  |
| AA875072 | Transcribed sequences                                                                                                                                                                                                                      | 10.6 | 17.5 |
| AA875084 | Transcribed sequence with strong similarity to protein ref:NP_445852.1 (R.norvegicus) transducin-like enhancer of split 3, homolog of Drosophila [Rattus norvegicus]                                                                       | 21.2 | 12.5 |
| AA875088 | Transcribed sequence                                                                                                                                                                                                                       | 1.5  | 0.5  |
| AA875089 | Calpastatin                                                                                                                                                                                                                                | 15.6 | 17.8 |
| AA875090 | Transcribed sequences                                                                                                                                                                                                                      | 25.4 | 19.7 |
| AA875097 | Transcribed sequence with strong similarity to protein sp:P06399 (R.norvegicus) FIBA_RAT Fibrinogen alpha/alpha-E chain precursor                                                                                                          | 8.8  | 6.3  |
| AA875098 | Transcribed sequence with weak similarity to protein ref:NP_445760.1 (R.norvegicus) FK506 binding protein 2 (13 kDa) [Rattus norvegicus]                                                                                                   | 8.8  | 9    |
| AA875099 | nuclear pore associated protein                                                                                                                                                                                                            | 19.2 | 13.3 |
| AA875103 | Transcribed sequence with weak similarity to protein sp:P41777 (R.norvegicus) NP14_RAT Nucleolar phosphoprotein p130 (Nucleolar 130 kDa protein) (140 kDa nucleolar phosphoprotein) (Nopp140) (Nucleolar and coiled-body phosphoprotein 1) | 18.2 | 3.1  |
| AA875105 | Transcribed sequences                                                                                                                                                                                                                      | 35.1 | 17.4 |
| AA875107 | Transcribed sequence with moderate similarity to protein ref:NP_004533.1 (H.sapiens) NADH dehydrogenase (ubiquinone) 1 alpha subcomplex, 3 (9kD, B9) [Homo sapiens]                                                                        | 99.6 | 37.7 |
| AA875122 | Transcribed sequences                                                                                                                                                                                                                      | 22.6 | 14.7 |
| AA875123 | Transcribed sequence                                                                                                                                                                                                                       | 17.3 | 10.6 |
| AA875126 | Transcribed sequences                                                                                                                                                                                                                      | 7.6  | 8.9  |
| AA875126 | Transcribed sequences                                                                                                                                                                                                                      | 3.1  | 1.2  |
| AA875127 | Transcribed sequence with strong similarity to protein ref:NP_003709.2 (H.sapiens) cell division cycle 2-like 5, isoform 1; cholinesterase-related cell division controller; CDC2-related protein kinase 5 [Homo sapiens]                  | 43.9 | 15.2 |
| AA875127 | Transcribed sequence with strong similarity to protein ref:NP_003709.2 (H.sapiens) cell division cycle 2-like 5, isoform 1; cholinesterase-related cell division controller; CDC2-related protein kinase 5 [Homo sapiens]                  | 12.4 | 11.2 |
| AA875129 | Transcribed sequence with strong similarity to protein ref:NP_076365.1 (M.musculus) elongation protein 4 homolog (S. cerevisiae) [Mus musculus]                                                                                            | 7.2  | 6.4  |
| AA875130 | Transcribed sequences                                                                                                                                                                                                                      | 8.8  | 6.3  |
| AA875131 | tyrosine protein kinase pp60-c-src                                                                                                                                                                                                         | 10.7 | 3.5  |
| AA875132 | Transcribed sequences                                                                                                                                                                                                                      | 7.7  | 5.4  |
| AA875133 | PAK-interacting exchange factor beta                                                                                                                                                                                                       | 4.9  | 2.6  |
| AA875135 | ADP-ribosylation factor-like 5                                                                                                                                                                                                             | 11.3 | 9    |
| AA875136 | Transcribed sequences                                                                                                                                                                                                                      | 9    | 7.8  |
| AA875142 | 5-hydroxytryptamine (serotonin) receptor 3a                                                                                                                                                                                                | 68.6 | 16.1 |
| AA875143 | Transcribed sequences                                                                                                                                                                                                                      | 11.6 | 7.8  |
| AA875147 | Transcribed sequence with weak similarity to protein ref:NP_505473.1 (C.elegans) F25B3.6.p [Caenorhabditis elegans]                                                                                                                        | 5.1  | 3.8  |
| AA875151 | Transcribed sequence                                                                                                                                                                                                                       | 4    | 4.6  |
| AA875152 | Transcribed sequences                                                                                                                                                                                                                      | 4.7  | 2.9  |
| AA875154 | Transcribed sequence with weak similarity to protein pir:I48216 (R.norvegicus) I48216 neurexin III-alpha membrane-bound type 1 precursor - rat                                                                                             | 16.1 | 10.5 |
| AA875165 | Transcribed sequence with strong similarity to protein ref:NP_055259.1 (H.sapiens) gamma tubulin ring complex protein (76p gene) [Homo sapiens]                                                                                            | 19.5 | 31.8 |
| AA875165 | Transcribed sequence with strong similarity to protein ref:NP_055259.1 (H.sapiens) gamma tubulin ring complex protein (76p gene) [Homo sapiens]                                                                                            | 5.6  | 1.3  |
| AA875182 | Transcribed sequence with weak similarity to protein ref:NP_033307.1 (M.musculus) zinc finger protein 143; selenocysteine tRNA gene transcription activating factor [Mus musculus]                                                         | 6.9  | 4.8  |
| AA875186 | Transcribed sequences                                                                                                                                                                                                                      | 12.5 | 10.4 |
| AA875190 | Transcribed sequences                                                                                                                                                                                                                      | 4.3  | 2.4  |
| AA875192 | Transcribed sequence with strong similarity to protein ref:NP_079642.1 (M.musculus) RIKEN cDNA 1110001O19 [Mus musculus]                                                                                                                   | 72.5 | 25.1 |

|          |                                                                                                                                                                                  |       |      |
|----------|----------------------------------------------------------------------------------------------------------------------------------------------------------------------------------|-------|------|
| AA875197 | Transcribed sequences                                                                                                                                                            | 32.8  | 23.1 |
| AA875198 | Transcribed sequences                                                                                                                                                            | 10.6  | 9    |
| AA875199 | Transcribed sequences                                                                                                                                                            | 18.2  | 5.7  |
| AA875203 | Transcribed sequences                                                                                                                                                            | 19.5  | 16.7 |
| AA875207 | Transcribed sequence with strong similarity to protein pir:S34719 (R.norvegicus) S34719 hemoglobin beta-2.0 chain - rat                                                          | 116.7 | 78.2 |
| AA875209 | Transcribed sequences                                                                                                                                                            | 9     | 8    |
| AA875213 | peptidoglycan recognition protein                                                                                                                                                | 6.5   | 4.2  |
| AA875215 | Transcribed sequence with moderate similarity to protein sp:P70483 (R.norvegicus) STRN_RAT Striatin                                                                              | 14.4  | 9.4  |
| AA875217 | Transcribed sequences                                                                                                                                                            | 39.3  | 26.8 |
| AA875227 | Transcribed sequences                                                                                                                                                            | 61.6  | 58.8 |
| AA875232 | Transcribed sequences                                                                                                                                                            | 3.9   | 1.5  |
| AA875244 | Transcribed sequence with moderate similarity to protein pdb:1LBG (E. coli) B Chain B, Lactose Operon Repressor Bound To 21-Base Pair Symmetric Operator Dna, Alpha Carbons Only | 6.4   | 3.7  |
| AA875255 | Transcribed sequences                                                                                                                                                            | 11.5  | 7.1  |
| AA875257 | Transcribed sequences                                                                                                                                                            | 32.6  | 11.3 |
| AA875261 | Transcribed sequences                                                                                                                                                            | 58.7  | 38.6 |
| AA875265 | Transcribed sequences                                                                                                                                                            | 15.5  | 16.5 |
| AA875265 | Transcribed sequences                                                                                                                                                            | 2.9   | 2    |
| AA875269 | stearoyl-Coenzyme A desaturase 2                                                                                                                                                 | 12.1  | 7.5  |
| AA875275 | Transcribed sequences                                                                                                                                                            | 9.7   | 6.2  |
| AA875278 | Transcribed sequence with moderate similarity to protein ref:NP_068741.1 (H.sapiens) Fanconi anemia, complementation group E [Homo sapiens]                                      | 33.5  | 9.2  |
| AA875280 | Transcribed sequence with moderate similarity to protein pdb:1LBG (E. coli) B Chain B, Lactose Operon Repressor Bound To 21-Base Pair Symmetric Operator Dna, Alpha Carbons Only | 6.8   | 8.2  |
| AA875286 | Transcribed sequence with strong similarity to protein ref:NP_059128.1 (H.sapiens) prostate tumor over expressed gene 1 [Homo sapiens]                                           | 21.7  | 13   |
| AA875288 | Transcribed sequences                                                                                                                                                            | 7.4   | 6.8  |
| AA875307 | Transcribed sequence with weak similarity to protein pir:A40452 (R.norvegicus) A40452 keratin 21, type I, cytoskeletal - rat                                                     | 22.6  | 17.3 |
| AA875316 | Transcribed sequences                                                                                                                                                            | 28.7  | 14.9 |
| AA875324 | Transcribed sequences                                                                                                                                                            | 21    | 12.6 |
| AA875327 | Transcribed sequence with weak similarity to protein ref:NP_072143.1 (R.norvegicus) nucleolin-related protein NRP (NRP) [Rattus norvegicus]                                      | 24    | 14.8 |
| AA875348 | Transcribed sequences                                                                                                                                                            | 12.8  | 5.1  |
| AA875362 | Transcribed sequences                                                                                                                                                            | 5.9   | 6.1  |
| AA875390 | thioredoxin-like (32kD)                                                                                                                                                          | 2.2   | 0.5  |
| AA875405 | Transcribed sequences                                                                                                                                                            | 16.6  | 12.4 |
| AA875406 | Transcribed sequences                                                                                                                                                            | 11.8  | 3.9  |
| AA875407 | Transcribed sequences                                                                                                                                                            | 31.1  | 16.9 |
| AA875411 | suppressor of K+ transport defect 3                                                                                                                                              | 7.2   | 4.7  |
| AA875414 | Transcribed sequence with weak similarity to protein ref:NP_059088.1 (M.musculus) cadherin EGF LAG seven-pass G-type receptor 2 [Mus musculus]                                   | 7.5   | 6.1  |
| AA875420 | Transcribed sequences                                                                                                                                                            | 51.9  | 35.5 |
| AA875425 | Transcribed sequences                                                                                                                                                            | 28.5  | 8.2  |
| AA875427 | amino-terminal enhancer of split                                                                                                                                                 | 89.3  | 27.5 |
| AA875428 | Transcribed sequence with weak similarity to protein ref:NP_113915.1 (R.norvegicus) LIM-domain containing, protein kinase [Rattus norvegicus]                                    | 17.1  | 13   |
| AA875437 | Transcribed sequences                                                                                                                                                            | 20.3  | 11.9 |
| AA875438 | Transcribed sequences                                                                                                                                                            | 9.6   | 12.4 |
| AA875444 | Transcribed sequence with strong similarity to protein pir:S49985 (R.norvegicus) S49985 dihydropyrimidinase-related protein 2 [similarity] - rat                                 | 35.7  | 6.2  |
| AA875450 | Transcribed sequence with weak similarity to protein pir:A48018 (H.sapiens) A48018 mucin 7 precursor, salivary - human                                                           | 23.2  | 13   |
| AA875455 | p53-activated gene 608                                                                                                                                                           | 21.9  | 12.7 |
| AA875467 | Transcribed sequences                                                                                                                                                            | 10.5  | 9    |
| AA875468 | Transcribed sequence with moderate similarity to protein ref:NP_068678.1 (M.musculus) jumoni protein [Mus musculus]                                                              | 10.9  | 5.9  |
| AA875471 | Transcribed sequence with strong similarity to protein ref:NP_031947.1 (M.musculus) E74-like factor 3 [Mus musculus]                                                             | 10.2  | 4.1  |
| AA875495 | Transcribed sequences                                                                                                                                                            | 11.3  | 5.4  |
| AA875496 | Transcribed sequence with moderate similarity to protein ref:NP_542395.1 (H.sapiens) hypothetical protein MGC9912 [Homo sapiens]                                                 | 99.4  | 46.8 |
| AA875500 | Transcribed sequences                                                                                                                                                            | 8.3   | 5.1  |
| AA875506 | Transcribed sequences                                                                                                                                                            | 38.7  | 14.5 |
| AA875509 | Transcribed sequence with moderate similarity to protein pir:S15349 (M.musculus) S15349 mdm2 protein - mouse                                                                     | 19.3  | 19.7 |
| AA875511 | Transcribed sequences                                                                                                                                                            | 94.1  | 28   |
| AA875512 | hemoglobin Y, beta-like embryonic chain                                                                                                                                          | 6.1   | 1.8  |
| AA875527 | Transcribed sequences                                                                                                                                                            | 9.6   | 6.7  |
| AA875531 | Transcribed sequences                                                                                                                                                            | 52.3  | 11.3 |
| AA875534 | Transcribed sequence with moderate similarity to protein pir:S25288 (R.norvegicus) S25288 BTEB protein - rat                                                                     | 5.7   | 3.4  |
| AA875539 | Transcribed sequence with moderate similarity to protein ref:NP_036540.1 (H.sapiens) protein kinase C binding protein 1 [Homo sapiens]                                           | 2.4   | 0.4  |
| AA875554 | Transcribed sequences                                                                                                                                                            | 3.4   | 4.1  |
| AA875563 | Transcribed sequence with weak similarity to protein pir:I56519 (R.norvegicus) I56519 taipoxin-associated calcium binding protein-49 precursor - rat                             | 29.5  | 14.9 |

|          |                                                                                                                                                                                                                                                                                         |       |      |
|----------|-----------------------------------------------------------------------------------------------------------------------------------------------------------------------------------------------------------------------------------------------------------------------------------------|-------|------|
| AA875563 | Transcribed sequence with weak similarity to protein pir:I56519 (R.norvegicus) I56519 taipoxin-associated calcium binding protein-49 precursor - rat                                                                                                                                    | 20.5  | 15.8 |
| AA875572 | Transcribed sequences                                                                                                                                                                                                                                                                   | 8.2   | 7.7  |
| AA875577 | Transcribed sequences                                                                                                                                                                                                                                                                   | 7.1   | 7.1  |
| AA875582 | lysyl oxidase                                                                                                                                                                                                                                                                           | 6     | 5.1  |
| AA875587 | Transcribed sequences                                                                                                                                                                                                                                                                   | 2.7   | 3.7  |
| AA875598 | Transcribed sequence with weak similarity to protein sp:Q9WTX6 (M.musculus) CUL1_MOUSE Cullin homolog 1 (CUL-1)                                                                                                                                                                         | 14.6  | 12.6 |
| AA875602 | Transcribed sequence with strong similarity to protein pir:T45074 (H.sapiens) T45074 probable phenylalanine-tRNA ligase (EC 6.1.1.20) [imported] - human                                                                                                                                | 9.4   | 2.2  |
| AA875609 | Transcribed sequence with moderate similarity to protein prf:2020285A (M.musculus) 2020285A BRG1 protein [Mus musculus]                                                                                                                                                                 | 12.4  | 8.3  |
| AA875615 | Transcribed sequence with strong similarity to protein sp:Q9JHI7 (M.musculus) PMC1_MOUSE Polymyositis/scleroderma autoantigen 1 (Autoantigen PM/Sci 1) (Polymyositis/scleroderma autoantigen 75 kDa) (PM/Sci-75) (P75 polymyositis-scleroderma overlap syndrome associated autoantigen) | 9.1   | 4.8  |
| AA875617 | Transcribed sequences                                                                                                                                                                                                                                                                   | 17.6  | 10.4 |
| AA875620 | Transcribed sequences                                                                                                                                                                                                                                                                   | 125.7 | 92.7 |
| AA875620 | Transcribed sequences                                                                                                                                                                                                                                                                   | 10.7  | 7.3  |
| AA875629 | Transcribed sequences                                                                                                                                                                                                                                                                   | 19    | 15.5 |
| AA875635 | Transcribed sequences                                                                                                                                                                                                                                                                   | 30.4  | 9.2  |
| AA875639 | Transcribed sequence with weak similarity to protein sp:P12785 (R.norvegicus) FAS_RAT FATTY ACID SYNTHASE [INCLUDES: EC 2.3.1.38; EC 2.3.1.39; EC 2.3.1.41; EC 1.1.1.100; EC 4.2.1.61; EC 1.3.1.10; EC 3.1.2.14]                                                                        | 13.4  | 5.9  |
| AA875641 | Transcribed sequence with moderate similarity to protein sp:Q08509 (M.musculus) EPS8_MOUSE Epidermal growth factor receptor kinase substrate EPS8                                                                                                                                       | 66.7  | 58.5 |
| AA875646 | hypothetical RNA binding protein RDA288                                                                                                                                                                                                                                                 | 8.8   | 9.6  |
| AA875654 | Transcribed sequences                                                                                                                                                                                                                                                                   | 30.6  | 8    |
| AA875659 | intemexin, alpha                                                                                                                                                                                                                                                                        | 8.8   | 1.8  |
| AA875661 | Transcribed sequence with weak similarity to protein pir:S58284 (H.sapiens) S58284 BCL7B protein - human                                                                                                                                                                                | 33.2  | 12.4 |
| AA875664 | Transcribed sequence with strong similarity to protein ref:NP_079847.1 (M.musculus) mitochondria associated granulocyte macrophage CSF signaling molecule [Mus musculus]                                                                                                                | 17.7  | 13.6 |
| AA875665 | Rattus norvegicus (clone REM1) ORF mRNA, partial cds                                                                                                                                                                                                                                    | 34.3  | 31.3 |
| AA875665 | Rattus norvegicus (clone REM1) ORF mRNA, partial cds                                                                                                                                                                                                                                    | 18.3  | 9.8  |
| AA891032 | Transcribed sequence with moderate similarity to protein sp:P54797 (M.musculus) T10_MOUSE Ser/Thr-rich protein T10 in DGCR region                                                                                                                                                       | 10.8  | 3.4  |
| AA891037 | Transcribed sequence with moderate similarity to protein sp:P21531 (R.norvegicus) RL3_RAT 60S RIBOSOMAL PROTEIN L3 (L4)                                                                                                                                                                 | 24.1  | 12   |
| AA891037 | Transcribed sequence with moderate similarity to protein sp:P21531 (R.norvegicus) RL3_RAT 60S RIBOSOMAL PROTEIN L3 (L4)                                                                                                                                                                 | 18.6  | 8.6  |
| AA891041 | jun B proto-oncogene                                                                                                                                                                                                                                                                    | 50.4  | 21.3 |
| AA891045 | nucleoporin p58                                                                                                                                                                                                                                                                         | 7     | 6.2  |
| AA891049 | Transcribed sequence with weak similarity to protein prf:2019243A (R.norvegicus) 2019243A amyloid precursor-like protein 2 [Rattus norvegicus]                                                                                                                                          | 12.6  | 6.4  |
| AA891054 | Transcribed sequence with weak similarity to protein pir:A43932 (H.sapiens) A43932 mucin 2 precursor, intestinal - human (fragments)                                                                                                                                                    | 16.5  | 22.7 |
| AA891058 | Transcribed sequences                                                                                                                                                                                                                                                                   | 12.9  | 8.4  |
| AA891068 | Peptidylglycine alpha-amidating monooxygenase                                                                                                                                                                                                                                           | 88.2  | 71.7 |
| AA891069 | Transcribed sequence with weak similarity to protein sp:Q63117 (R.norvegicus) CLK3_RAT Protein kinase CLK3 (CDC-like kinase 3)                                                                                                                                                          | 11.8  | 7.6  |
| AA891107 | diphosphoinositol polyphosphate phosphohydrolase type II                                                                                                                                                                                                                                | 52.3  | 31.7 |
| AA891108 | Transcribed sequences                                                                                                                                                                                                                                                                   | 12.7  | 7.9  |
| AA891127 | Nucleolin                                                                                                                                                                                                                                                                               | 122.3 | 73.5 |
| AA891132 | LIC-2 dynein light intermediate chain 53/55                                                                                                                                                                                                                                             | 5.2   | 4.6  |
| AA891139 | Transcribed sequence                                                                                                                                                                                                                                                                    | 17    | 9.5  |
| AA891140 | Transcribed sequence with moderate similarity to protein ref:NP_060594.1 (H.sapiens) hypothetical protein FLJ10520 [Homo sapiens]                                                                                                                                                       | 7.7   | 2.5  |
| AA891140 | Transcribed sequence with moderate similarity to protein ref:NP_060594.1 (H.sapiens) hypothetical protein FLJ10520 [Homo sapiens]                                                                                                                                                       | 3.1   | 1    |
| AA891161 | Transcribed sequences                                                                                                                                                                                                                                                                   | 14.5  | 8.9  |
| AA891166 | Transcribed sequences                                                                                                                                                                                                                                                                   | 6.6   | 8.8  |
| AA891194 | Arg/Abi-interacting protein ArgBP2                                                                                                                                                                                                                                                      | 11.6  | 9.3  |
| AA891196 | Transcribed sequence with weak similarity to protein ref:NP_057479.1 (H.sapiens) butyrate-induced transcript 1; hypothetical protein; butyrate-induced transcript 1 [Homo sapiens]                                                                                                      | 10.2  | 4.4  |
| AA891204 | Secreted acidic cystein-rich glycoprotein (osteonection)                                                                                                                                                                                                                                | 3.7   | 3.6  |
| AA891209 | Transcribed sequence with strong similarity to protein ref:NP_543027.1 (M.musculus) interleukin 25; lymphocyte antigen 6 complex, locus E ligand [Mus musculus]                                                                                                                         | 37.6  | 32.1 |
| AA891214 | ABO blood group (transferase A, alpha 1-3-N-acetylgalactosaminyltransferase; transferase B, alpha 1-3-galactosyltransferase)                                                                                                                                                            | 4     | 0.7  |
| AA891220 | Transcribed sequences                                                                                                                                                                                                                                                                   | 18.5  | 8.8  |
| AA891222 | Transcribed sequences                                                                                                                                                                                                                                                                   | 11.2  | 10.4 |
| AA891233 | Transcribed sequence                                                                                                                                                                                                                                                                    | 19.6  | 9.8  |
| AA891242 | Transcribed sequence with weak similarity to protein sp:P08733 (R.norvegicus) MLRV_RAT Myosin regulatory light chain 2, ventricular/cardiac muscle isoform (MLC-2)                                                                                                                      | 26.9  | 20   |
| AA891242 | Transcribed sequence with weak similarity to protein sp:P08733 (R.norvegicus) MLRV_RAT Myosin regulatory light chain 2, ventricular/cardiac muscle isoform (MLC-2)                                                                                                                      | 14.3  | 9    |
| AA891255 | Transcribed sequences                                                                                                                                                                                                                                                                   | 15.1  | 14.7 |
| AA891260 | Transcribed sequences                                                                                                                                                                                                                                                                   | 21.6  | 8.2  |



|          |                                                                                                                                                                                                                                                                                  |      |      |
|----------|----------------------------------------------------------------------------------------------------------------------------------------------------------------------------------------------------------------------------------------------------------------------------------|------|------|
| AA891271 | Transcribed sequences                                                                                                                                                                                                                                                            | 13.6 | 7.1  |
| AA891283 | Transcribed sequence with strong similarity to protein sp:P30277 (R.norvegicus) CGB1_RAT G2/mitotic-specific cyclin B1                                                                                                                                                           | 2.1  | 0.7  |
| AA891288 | Transcribed sequences                                                                                                                                                                                                                                                            | 24.5 | 8    |
| AA891288 | Transcribed sequences                                                                                                                                                                                                                                                            | 5.2  | 1.2  |
| AA891290 | Transcribed sequence with weak similarity to protein ref:NP_570842.1 (R.norvegicus) paralemm [Rattus norvegicus]                                                                                                                                                                 | 12.3 | 13.4 |
| AA891290 | Transcribed sequence with weak similarity to protein ref:NP_570842.1 (R.norvegicus) paralemm [Rattus norvegicus]                                                                                                                                                                 | 5.6  | 3.2  |
| AA891297 | discs, large homolog 1 (Drosophila)                                                                                                                                                                                                                                              | 21.3 | 11   |
| AA891302 | Transcribed sequence with weak similarity to protein ref:NP_033032.1 (M.musculus) mitogen activated protein kinase kinase kinase 2; RAB8 interacting protein [Mus musculus]                                                                                                      | 38.3 | 19.1 |
| AA891308 | Transcribed sequence with strong similarity to protein ref:NP_004260.1 (H.sapiens) cofactor required for Sp1 transcriptional activation, subunit 8 (34kD); 34 kDa transcriptional co-activator; p37 TRAP/SMCC/PC2 subunit [Homo sapiens]                                         | 54.8 | 27.8 |
| AA891311 | Transcribed sequences                                                                                                                                                                                                                                                            | 9.4  | 6.9  |
| AA891314 | Transcribed sequence with weak similarity to protein ref:NP_476482.1 (R.norvegicus) heterogeneous nuclear ribonucleoprotein K [Rattus norvegicus]                                                                                                                                | 98.4 | 32.9 |
| AA891322 | Transcribed sequence with weak similarity to protein sp:P13383 (R.norvegicus) NUCL_RAT Nucleolin (Protein C23)                                                                                                                                                                   | 4.3  | 0.8  |
| AA891356 | Transcribed sequences                                                                                                                                                                                                                                                            | 14.6 | 12   |
| AA891362 | L-3-hydroxyacyl-Coenzyme A dehydrogenase, short chain                                                                                                                                                                                                                            | 27.3 | 13.4 |
| AA891383 | proteasome (prosome, macropain) subunit, alpha type 5                                                                                                                                                                                                                            | 7    | 9.5  |
| AA891396 | Transcribed sequences                                                                                                                                                                                                                                                            | 10.8 | 5.7  |
| AA891423 | Transcribed sequence with moderate similarity to protein ref:NP_078813.1 (H.sapiens) hypothetical protein FLJ12118 [Homo sapiens]                                                                                                                                                | 24.7 | 11.9 |
| AA891438 | Transcribed sequence with moderate similarity to protein ref:NP_076281.1 (M.musculus) pantothenate kinase 1 beta [Mus musculus]                                                                                                                                                  | 22.7 | 15.6 |
| AA891438 | Transcribed sequence with moderate similarity to protein ref:NP_076281.1 (M.musculus) pantothenate kinase 1 beta [Mus musculus]                                                                                                                                                  | 17   | 6.5  |
| AA891439 | Transcribed sequences                                                                                                                                                                                                                                                            | 52.3 | 29.7 |
| AA891445 | suppressor of K+ transport defect 3                                                                                                                                                                                                                                              | 7.7  | 7.2  |
| AA891446 | troponin 1, type 3                                                                                                                                                                                                                                                               | 30.1 | 19.5 |
| AA891447 | Transcribed sequences                                                                                                                                                                                                                                                            | 6.1  | 8.5  |
| AA891476 | Transcribed sequences                                                                                                                                                                                                                                                            | 24.7 | 8.8  |
| AA891521 | Transcribed sequences                                                                                                                                                                                                                                                            | 4.9  | 4.8  |
| AA891522 | myosin heavy chain, polypeptide 7                                                                                                                                                                                                                                                | 1.7  | 0.8  |
| AA891524 | Transcribed sequence with moderate similarity to protein ref:NP_080434.1 (M.musculus) RIKEN cDNA 0610042E07 [Mus musculus]                                                                                                                                                       | 51   | 38.9 |
| AA891527 | four and a half LIM domains 2                                                                                                                                                                                                                                                    | 22   | 17   |
| AA891546 | Transcribed sequence with moderate similarity to protein ref:NP_064573.1 (H.sapiens) DC13 protein [Homo sapiens]                                                                                                                                                                 | 34.6 | 15.3 |
| AA891551 | Transcribed sequence with strong similarity to protein ref:NP_473440.1 (M.musculus) RIKEN cDNA 1110038F14 gene [Mus musculus]                                                                                                                                                    | 13.2 | 12.1 |
| AA891553 | Transcribed sequence with strong similarity to protein sp:O70194 (M.musculus) IF37_MOUSE Eukaryotic translation initiation factor 3 subunit 7 (eIF-3 zeta) (eIF3 p66)                                                                                                            | 69   | 40.8 |
| AA891559 | Transcribed sequences                                                                                                                                                                                                                                                            | 5.6  | 2.2  |
| AA891571 | Transcribed sequence with moderate similarity to protein ref:NP_079136.1 (H.sapiens) hypothetical protein FLJ21148 [Homo sapiens]                                                                                                                                                | 7.6  | 7.5  |
| AA891576 | Transcribed sequence with weak similarity to protein pir:S49158 (R.norvegicus) S49158 complement protein C1q beta chain precursor - rat                                                                                                                                          | 13.6 | 12.5 |
| AA891578 | Transcribed sequences                                                                                                                                                                                                                                                            | 10.1 | 6.3  |
| AA891580 | Transcribed sequences                                                                                                                                                                                                                                                            | 29.6 | 12.5 |
| AA891588 | Transcribed sequences                                                                                                                                                                                                                                                            | 9.2  | 1.8  |
| AA891589 | Transcribed sequences                                                                                                                                                                                                                                                            | 30.4 | 18.5 |
| AA891591 | programmed cell death 8 (apoptosis-inducing factor)                                                                                                                                                                                                                              | 20.7 | 14.3 |
| AA891595 | Transcribed sequences                                                                                                                                                                                                                                                            | 12.5 | 8.3  |
| AA891596 | Transcribed sequences                                                                                                                                                                                                                                                            | 3.6  | 2.6  |
| AA891600 | Transcribed sequence with weak similarity to protein sp:Q62981 (R.norvegicus) OZF_RAT Zinc finger protein OZF (POZF-1)                                                                                                                                                           | 7.6  | 5.2  |
| AA891614 | voltage-gated Ca channel                                                                                                                                                                                                                                                         | 12.7 | 11.1 |
| AA891631 | Transcribed sequences                                                                                                                                                                                                                                                            | 10.6 | 14.1 |
| AA891633 | Lysophospholipase 1                                                                                                                                                                                                                                                              | 21   | 7.3  |
| AA891634 | Transcribed sequences                                                                                                                                                                                                                                                            | 6.4  | 4.8  |
| AA891650 | Transcribed sequences                                                                                                                                                                                                                                                            | 38.5 | 14.8 |
| AA891651 | Transcribed sequence with moderate similarity to protein pir:T00741 (H.sapiens) T00741 NADH dehydrogenase (ubiquinone) (EC 1.6.5.3) acyl carrier chain, mitochondrial - human (fragment)                                                                                         | 7.7  | 10.4 |
| AA891664 | Transcribed sequences                                                                                                                                                                                                                                                            | 39.8 | 20   |
| AA891666 | melanoma antigen, family D, 1                                                                                                                                                                                                                                                    | 9.2  | 5.8  |
| AA891669 | RAB11B, member RAS oncogene family                                                                                                                                                                                                                                               | 34.6 | 4.3  |
| AA891670 | Transcribed sequence with moderate similarity to protein ref:NP_034894.1 (M.musculus) mannosidase 2, alpha B1; lysosomal alpha-mannosidase [Mus musculus]                                                                                                                        | 15.5 | 11.9 |
| AA891677 | Transcribed sequences                                                                                                                                                                                                                                                            | 11   | 7.8  |
| AA891681 | Transcribed sequence with weak similarity to protein sp:P43035 (R.norvegicus) LIS1_MOUSE Platelet-activating factor acetylhydrolase IB alpha subunit (PAF acetylhydrolase 45 kDa subunit) (PAF-AH 45 kDa subunit) (PAF-AH alpha) (PAFAH alpha) (Lissencephaly-1 protein) (LIS-1) | 13.3 | 7.6  |
| AA891689 | Transcribed sequence with weak similarity to protein pir:A36126 (R.norvegicus) A36126 23K phosphatidylethanolamine-binding protein - rat                                                                                                                                         | 12.3 | 10.9 |

|          |                                                                                                                                                                                                     |      |      |
|----------|-----------------------------------------------------------------------------------------------------------------------------------------------------------------------------------------------------|------|------|
| AA891689 | Transcribed sequence with weak similarity to protein pir:A36126 (R.norvegicus) A36126 23K phosphatidylethanolamine-binding protein - rat                                                            | 3.2  | 2.2  |
| AA891690 | Transcribed sequence with strong similarity to protein ref:NP_076006.1 (M.musculus) tumor necrosis factor (ligand) superfamily, member 13 [Mus musculus]                                            | 22.2 | 19.2 |
| AA891693 | Transcribed sequences                                                                                                                                                                               | 5    | 4.7  |
| AA891694 | Transcribed sequences                                                                                                                                                                               | 15.7 | 9.6  |
| AA891695 | Transcribed sequence with moderate similarity to protein pir:A45835 (R.norvegicus) A45835 Ly6 homolog RK10 precursor - rat                                                                          | 43.4 | 16.8 |
| AA891695 | Transcribed sequence with moderate similarity to protein pir:A45835 (R.norvegicus) A45835 Ly6 homolog RK10 precursor - rat                                                                          | 31.5 | 17.1 |
| AA891700 | Transcribed sequences                                                                                                                                                                               | 21.1 | 8.2  |
| AA891716 | Transcribed sequence with strong similarity to protein ref:NP_084535.1 (M.musculus) hypothetical protein, MGC:7036; hypothetical protein MGC7036 [Mus musculus]                                     | 93   | 35.4 |
| AA891717 | upstream transcription factor 1                                                                                                                                                                     | 9.9  | 7.2  |
| AA891719 | Transcribed sequence with weak similarity to protein pir:A57080 (R.norvegicus) A57080 cell surface antigen RB13-6 - rat                                                                             | 9.1  | 4.3  |
| AA891721 | Transcribed sequences                                                                                                                                                                               | 22.2 | 14.1 |
| AA891724 | Transcribed sequence with strong similarity to protein ref:NP_084067.1 (M.musculus) bicaudal D homolog 2 (Drosophila) [Mus musculus]                                                                | 31.7 | 13.9 |
| AA891726 | solute carrier family 34, member 1                                                                                                                                                                  | 25.6 | 17.9 |
| AA891727 | Transcribed sequence with strong similarity to protein ref:NP_080339.1 (M.musculus) RIKEN cDNA 2900010M23 [Mus musculus]                                                                            | 7.8  | 8.2  |
| AA891733 | Transcribed sequences                                                                                                                                                                               | 9.8  | 6.3  |
| AA891735 | Transcribed sequences                                                                                                                                                                               | 64.3 | 48.3 |
| AA891737 | Transcribed sequences                                                                                                                                                                               | 17.5 | 23.6 |
| AA891738 | sulfite oxidase                                                                                                                                                                                     | 44.3 | 28.7 |
| AA891739 | Transcribed sequence with weak similarity to protein ref:NP_496168.1 (C.elegans) F52H3.5.p [Caenorhabditis elegans]                                                                                 | 4.5  | 5    |
| AA891749 | Transcribed sequence with moderate similarity to protein ref:NP_061927.1 (H.sapiens) hypothetical protein MGC5560; hypothetical protein [Homo sapiens]                                              | 8.9  | 3.7  |
| AA891753 | Transcribed sequence with strong similarity to protein ref:NP_079755.1 (M.musculus) RIKEN cDNA 2810021B07 [Mus musculus]                                                                            | 15.8 | 13.4 |
| AA891753 | Transcribed sequence with strong similarity to protein ref:NP_079755.1 (M.musculus) RIKEN cDNA 2810021B07 [Mus musculus]                                                                            | 12.8 | 5.2  |
| AA891758 | Transcribed sequence with moderate similarity to protein ref:NP_062307.1 (M.musculus) minichromosome maintenance deficient (S. cerevisiae) 3-associate; nuclear protein GANP [Mus musculus]         | 8.5  | 9.9  |
| AA891759 | Transcribed sequence with moderate similarity to protein ref:NP_115735.1 (H.sapiens) hypothetical protein MGC4308 [Homo sapiens]                                                                    | 8.4  | 6.9  |
| AA891760 | Transcribed sequence with moderate similarity to protein ref:NP_071934.1 (H.sapiens) hypothetical protein FLJ22056 [Homo sapiens]                                                                   | 63.5 | 26.4 |
| AA891764 | low density lipoprotein receptor-related protein 2                                                                                                                                                  | 11.9 | 12   |
| AA891774 | Transcribed sequences                                                                                                                                                                               | 6.4  | 2.5  |
| AA891785 | Transcribed sequence with weak similarity to protein sp:P41562 (R.norvegicus) IDHC_RAT ISOCITRATE DEHYDROGENASE [NADP] CYTOPLASMIC (OXALOSUCCINATE DECARBOXYLASE) (IDH) (NADP+-SPECIFIC ICDH) (IDP) | 5.1  | 0.9  |
| AA891796 | Transcribed sequence with strong similarity to protein ref:NP_079641.1 (M.musculus) RIKEN cDNA 1110002E23 [Mus musculus]                                                                            | 50.1 | 24   |
| AA891800 | Transcribed sequence with moderate similarity to protein ref:NP_008834.1 (H.sapiens) inorganic pyrophosphatase [Homo sapiens]                                                                       | 30.6 | 9    |
| AA891800 | Transcribed sequence with moderate similarity to protein ref:NP_008834.1 (H.sapiens) inorganic pyrophosphatase [Homo sapiens]                                                                       | 17.7 | 5.4  |
| AA891802 | Transcribed sequence with weak similarity to protein ref:NP_543181.1 (R.norvegicus) seven in absentia 1A [Rattus norvegicus]                                                                        | 10.2 | 8.4  |
| AA891803 | Transcribed sequence with strong similarity to protein ref:NP_079725.1 (M.musculus) nicotin 1 [Mus musculus]                                                                                        | 11.3 | 9.9  |
| AA891812 | adducin 1, alpha                                                                                                                                                                                    | 6.8  | 2.2  |
| AA891814 | Transcribed sequences                                                                                                                                                                               | 23.2 | 9.6  |
| AA891822 | Transcribed sequence with strong similarity to protein sp:Q61420 (M.musculus) CMST_MOUSE CMP-sialic acid transporter (CMP-Sia-Tr) (CMP-SA-Tr)                                                       | 10.4 | 11.4 |
| AA891824 | Rattus norvegicus clone ZG52 mRNA sequence                                                                                                                                                          | 13.6 | 7.1  |
| AA891826 | Transcribed sequences                                                                                                                                                                               | 6.8  | 1.7  |
| AA891828 | Transcribed sequence with strong similarity to protein prf:2206377A (M.musculus) 2206377A MHR23A gene [Mus musculus]                                                                                | 33.2 | 17.5 |
| AA891828 | Transcribed sequence with strong similarity to protein prf:2206377A (M.musculus) 2206377A MHR23A gene [Mus musculus]                                                                                | 22.1 | 11.9 |
| AA891829 | GTP cyclohydrolase 1                                                                                                                                                                                | 22.4 | 16.6 |
| AA891831 | Transcribed sequence with weak similarity to protein sp:P51652 (R.norvegicus) PE2R_RAT 20-alpha-hydroxysteroid dehydrogenase (20-alpha-HSD) (HSD1)                                                  | 22.7 | 19.3 |
| AA891834 | Transcribed sequence with strong similarity to protein pir:I48304 (M.musculus) I48304 collagen alpha 5(IV) chain - mouse (fragment)                                                                 | 11.6 | 9.2  |
| AA891838 | Transcribed sequence with strong similarity to protein ref:NP_057267.2 (H.sapiens) ribosomal protein P0-like protein; 60S acidic ribosomal protein PO [Homo sapiens]                                | 31.3 | 17.9 |
| AA891839 | Transcribed sequences                                                                                                                                                                               | 12   | 6.4  |
| AA891842 | Transcribed sequence with weak similarity to protein ref:NP_057713.1 (H.sapiens) hypothetical protein LOC51323 [Homo sapiens]                                                                       | 8.7  | 2.9  |
| AA891844 | Transcribed sequences                                                                                                                                                                               | 21.6 | 11.4 |
| AA891848 | Catalase                                                                                                                                                                                            | 11.8 | 12.6 |

|          |                                                                                                                                                                                                                                            |       |      |
|----------|--------------------------------------------------------------------------------------------------------------------------------------------------------------------------------------------------------------------------------------------|-------|------|
| AA891851 | Transcribed sequence with weak similarity to protein pir:I56251 (M.musculus) I56251 GTP binding protein - mouse                                                                                                                            | 9.8   | 5.8  |
| AA891857 | fractured callus expressed transcript 1                                                                                                                                                                                                    | 63.2  | 11.1 |
| AA891857 | fractured callus expressed transcript 1                                                                                                                                                                                                    | 44.1  | 16.3 |
| AA891858 | Transcribed sequence with moderate similarity to protein sp:O88338 (M.musculus) CADG_MOUSE Cadherin-16 precursor (Kidney-specific cadherin) (Ksp-cadherin)                                                                                 | 12.3  | 16.3 |
| AA891859 | Transcribed sequences                                                                                                                                                                                                                      | 1.8   | 0.6  |
| AA891860 | Transcribed sequence with weak similarity to protein ref:NP_057562.1 (H.sapiens) hypothetical protein HSPC216 [Homo sapiens]                                                                                                               | 23.8  | 17.2 |
| AA891861 | Transcribed sequence with moderate similarity to protein ref:NP_443166.1 (H.sapiens) solute carrier family 26, member 9, isoform a; anion transporter/exchanger-9 [Homo sapiens]                                                           | 3.4   | 1.3  |
| AA891864 | Transcribed sequence with strong similarity to protein ref:NP_075817.1 (M.musculus) RIKEN cDNA 2900054O13 gene; nuclear ATP/GTP-binding protein; Purkinje cell degeneration [Mus musculus]                                                 | 40.7  | 19.1 |
| AA891871 | phosphoribosylpyrophosphate synthetase-associated protein (39 kDa)                                                                                                                                                                         | 25.3  | 17.3 |
| AA891880 | tricarboxylate carrier-like protein                                                                                                                                                                                                        | 31.9  | 30.9 |
| AA891884 | Transcribed sequences                                                                                                                                                                                                                      | 10.8  | 6    |
| AA891901 | polypyrimidine tract binding protein                                                                                                                                                                                                       | 42.3  | 14.9 |
| AA891901 | polypyrimidine tract binding protein                                                                                                                                                                                                       | 3     | 1.6  |
| AA891902 | Transcribed sequences                                                                                                                                                                                                                      | 20.5  | 12.9 |
| AA891903 | Transcribed sequence                                                                                                                                                                                                                       | 4.3   | 0.9  |
| AA891921 | Transcribed sequences                                                                                                                                                                                                                      | 2.9   | 2.1  |
| AA891923 | Transcribed sequences                                                                                                                                                                                                                      | 2.7   | 1.6  |
| AA891928 | Transcribed sequences                                                                                                                                                                                                                      | 42.4  | 12   |
| AA891931 | Transcribed sequences                                                                                                                                                                                                                      | 5.3   | 2.5  |
| AA891933 | Transcribed sequence with strong similarity to protein ref:NP_075721.1 (M.musculus) direct IAP binding protein with low PI [Mus musculus]                                                                                                  | 12.9  | 6    |
| AA891937 | dolichyl-di-phosphooligosaccharide-protein glycotransferase                                                                                                                                                                                | 21.6  | 17.2 |
| AA891943 | Transcribed sequences                                                                                                                                                                                                                      | 106.8 | 24.3 |
| AA891943 | Transcribed sequences                                                                                                                                                                                                                      | 5.8   | 1.3  |
| AA891949 | Transcribed sequences                                                                                                                                                                                                                      | 20    | 19.5 |
| AA891950 | Transcribed sequence with strong similarity to protein ref:NP_079740.1 (M.musculus) RIKEN cDNA 1810021J13 [Mus musculus]                                                                                                                   | 13    | 9.8  |
| AA891962 | Transcribed sequences                                                                                                                                                                                                                      | 15.1  | 5.9  |
| AA891969 | Transcribed sequence with strong similarity to protein ref:NP_065583.1 (M.musculus) nuclear DNA-binding protein; C1D protein; small unique nuclear co-repressor [Mus musculus]                                                             | 16.4  | 10.8 |
| AA892005 | Transcribed sequence with weak similarity to protein sp:P70580 (R.norvegicus) PGC1_RAT Membrane associated progesterone receptor component 1 (Acidic 25 kDa protein) (25-DX)                                                               | 20.8  | 11.3 |
| AA892006 | Transcribed sequence with weak similarity to protein sp:P50517 (R.norvegicus) VAB2_MOUSE Vacuolar ATP synthase subunit B, brain isoform (V-ATPase B2 subunit) (Vacuolar proton pump B isoform 2) (Endomembrane proton pump 58 kDa subunit) | 37.5  | 30   |
| AA892010 | Transcribed sequence with weak similarity to protein ref:NP_080911.1 (M.musculus) RIKEN cDNA 5730536A07 [Mus musculus]                                                                                                                     | 2.9   | 1.6  |
| AA892012 | glutamate oxaloacetate transaminase 2                                                                                                                                                                                                      | 9.5   | 9.1  |
| AA892012 | glutamate oxaloacetate transaminase 2                                                                                                                                                                                                      | 6.3   | 4.6  |
| AA892014 | HLA-B-associated transcript 1A                                                                                                                                                                                                             | 27.7  | 18.9 |
| AA892014 | HLA-B-associated transcript 1A                                                                                                                                                                                                             | 16.1  | 11   |
| AA892027 | Transcribed sequences                                                                                                                                                                                                                      | 16.5  | 12.4 |
| AA892036 | histone deacetylase 6                                                                                                                                                                                                                      | 22.5  | 11.3 |
| AA892049 | Transcribed sequences                                                                                                                                                                                                                      | 16.5  | 4.4  |
| AA892053 | ribosomal protein L18                                                                                                                                                                                                                      | 14.5  | 14.5 |
| AA892056 | Transcribed sequence with moderate similarity to protein ref:NP_062516.1 (M.musculus) REV1-like (S. cerevisiae); REV1 protein [Mus musculus]                                                                                               | 20.5  | 15.6 |
| AA892066 | cytochrome P450, family 26, subfamily b, polypeptide 1                                                                                                                                                                                     | 10.2  | 11.9 |
| AA892069 | Dipeptidyl peptidase 4                                                                                                                                                                                                                     | 5.8   | 5.7  |
| AA892083 | Transcribed sequences                                                                                                                                                                                                                      | 24.4  | 21.7 |
| AA892094 | Transcribed sequences                                                                                                                                                                                                                      | 15.8  | 9.4  |
| AA892111 | Transcribed sequence                                                                                                                                                                                                                       | 4.7   | 1.3  |
| AA892112 | Transcribed sequence with strong similarity to protein ref:NP_062419.2 (M.musculus) proline dehydrogenase (oxidase) 2; proline oxidase 1; kidney and liver proline oxidase 1 [Mus musculus]                                                | 21.5  | 14.8 |
| AA892112 | Transcribed sequence with strong similarity to protein ref:NP_062419.2 (M.musculus) proline dehydrogenase (oxidase) 2; proline oxidase 1; kidney and liver proline oxidase 1 [Mus musculus]                                                | 3.4   | 1.1  |
| AA892120 | Transcribed sequences                                                                                                                                                                                                                      | 12.6  | 8.6  |
| AA892127 | Transcribed sequence with weak similarity to protein ref:NP_197856.1 (A.thaliana) putative protein [Arabidopsis thaliana]                                                                                                                  | 28.2  | 18.3 |
| AA892128 | Transcribed sequences                                                                                                                                                                                                                      | 10.3  | 8.8  |
| AA892131 | Transcribed sequences                                                                                                                                                                                                                      | 6.7   | 1.7  |
| AA892137 | Transcribed sequence with strong similarity to protein ref:NP_079889.1 (M.musculus) open reading frame 12 [Mus musculus]                                                                                                                   | 38.4  | 13.8 |
| AA892149 | Transcribed sequences                                                                                                                                                                                                                      | 28.2  | 12   |
| AA892154 | Transcribed sequence with moderate similarity to protein pdb:1LBG (E. coli) B Chain B, Lactose Operon Repressor Bound To 21-Base Pair Symmetric Operator Dna, Alpha Carbons Only                                                           | 19.1  | 11.3 |
| AA892168 | Transcribed sequences                                                                                                                                                                                                                      | 9.5   | 10.3 |
| AA892173 | Transcribed sequence                                                                                                                                                                                                                       | 73.8  | 18.8 |
| AA892179 | Transcribed sequence with strong similarity to protein sp:O43734 (H.sapiens) CIKS_HUMAN Adapter protein CIKS (Connection to IKK and SAPK/JNK)                                                                                              | 42.8  | 11.3 |
| AA892189 | Transcribed sequences                                                                                                                                                                                                                      | 27.4  | 10.2 |
| AA892204 | Transcribed sequence                                                                                                                                                                                                                       | 10    | 12.8 |
| AA892207 | Transcribed sequences                                                                                                                                                                                                                      | 7.1   | 6.8  |

|          |                                                                                                                                                                                                                                                                                                 |       |      |
|----------|-------------------------------------------------------------------------------------------------------------------------------------------------------------------------------------------------------------------------------------------------------------------------------------------------|-------|------|
| AA892228 | Transcribed sequence with moderate similarity to protein ref:NP_058893.1 (R.norvegicus) elav-type RNA-binding protein 3 [Rattus norvegicus]                                                                                                                                                     | 10.9  | 8.8  |
| AA892232 | renin-binding protein                                                                                                                                                                                                                                                                           | 7.6   | 7.1  |
| AA892240 | Transcribed sequence with weak similarity to protein prf:2008109A (R.norvegicus) 2008109A set gene [Rattus norvegicus]                                                                                                                                                                          | 20.7  | 12.8 |
| AA892246 | vesicle-associated membrane protein 2                                                                                                                                                                                                                                                           | 30.4  | 19   |
| AA892251 | arginine vasopressin receptor 1A                                                                                                                                                                                                                                                                | 5     | 2.2  |
| AA892257 | Transcribed sequences                                                                                                                                                                                                                                                                           | 48.8  | 27.9 |
| AA892258 | NADPH oxidase 4                                                                                                                                                                                                                                                                                 | 3.6   | 1.1  |
| AA892260 | Steroidogenic acute regulatory protein                                                                                                                                                                                                                                                          | 66.6  | 25.1 |
| AA892260 | Steroidogenic acute regulatory protein                                                                                                                                                                                                                                                          | 27.4  | 14.8 |
| AA892264 | membrane-associated protein 17                                                                                                                                                                                                                                                                  | 9     | 7.6  |
| AA892268 | receptor-like tyrosine kinase                                                                                                                                                                                                                                                                   | 14.7  | 6    |
| AA892270 | Transcribed sequences                                                                                                                                                                                                                                                                           | 52.1  | 27.9 |
| AA892270 | Transcribed sequences                                                                                                                                                                                                                                                                           | 25.8  | 10.4 |
| AA892271 | Transcribed sequences                                                                                                                                                                                                                                                                           | 21.9  | 8.1  |
| AA892272 | Transcribed sequence with moderate similarity to protein sp:O95394 (H.sapiens) AGM1_HUMAN Phosphoacetylglucosamine mutase (PAGM) (Acetylglucosamine phosphomutase) (N-acetylglucosamine-phosphate mutase)                                                                                       | 17.6  | 15.4 |
| AA892273 | Transcribed sequences                                                                                                                                                                                                                                                                           | 17.8  | 8.6  |
| AA892280 | Transcribed sequences                                                                                                                                                                                                                                                                           | 39    | 23.1 |
| AA892284 | Transcribed sequences                                                                                                                                                                                                                                                                           | 7.4   | 5.4  |
| AA892287 | Transcribed sequence with weak similarity to protein ref:NP_061123.2 (H.sapiens) G protein-coupled receptor, family C, group 5, member C, isoform b, precursor; orphan G-protein coupled receptor; retinoic acid inducible gene 3 protein; retinoic acid responsive gene protein [Homo sapiens] | 5.9   | 2.3  |
| AA892294 | Transcribed sequences                                                                                                                                                                                                                                                                           | 22.8  | 23.9 |
| AA892296 | Transcribed sequences                                                                                                                                                                                                                                                                           | 11.3  | 11.9 |
| AA892297 | histone deacetylase 2                                                                                                                                                                                                                                                                           | 28.8  | 10.3 |
| AA892298 | peptidylprolyl cis-trans isomerase-like protein 3                                                                                                                                                                                                                                               | 11    | 10.5 |
| AA892299 | Transcribed sequences                                                                                                                                                                                                                                                                           | 3.3   | 2.4  |
| AA892300 | Transcribed sequences                                                                                                                                                                                                                                                                           | 31.2  | 22.7 |
| AA892301 | Transcribed sequences                                                                                                                                                                                                                                                                           | 11.6  | 12.5 |
| AA892303 | Transcribed sequences                                                                                                                                                                                                                                                                           | 18.6  | 8.4  |
| AA892304 | Transcribed sequence with strong similarity to protein ref:NP_036121.1 (M.musculus) COP9 (constitutive photomorphogenic), subunit 3 (Arabidopsis); COP9 complex S3 [Mus musculus]                                                                                                               | 4.6   | 4.7  |
| AA892305 | Transcribed sequence with moderate similarity to protein ref:NP_067530.1 (M.musculus) brain protein 16; DNA segment, Chr 15, ERATO Doi 741, expressed [Mus musculus]                                                                                                                            | 1.8   | 1    |
| AA892306 | Transcribed sequence with weak similarity to protein sp:Q9R060 (M.musculus) NUB1_MOUSE Nucleotide-binding protein 1 (NBP 1)                                                                                                                                                                     | 8.8   | 12.6 |
| AA892308 | Transcribed sequences                                                                                                                                                                                                                                                                           | 21    | 13.1 |
| AA892310 | Transcribed sequence with strong similarity to protein ref:NP_080731.1 (M.musculus) RIKEN cDNA 2510049I19 [Mus musculus]                                                                                                                                                                        | 40.9  | 14.2 |
| AA892312 | Transcribed sequence with strong similarity to protein sp:P52191 (R.norvegicus) IRKG_RAT Inward rectifier potassium channel 16 (Potassium channel, inwardly rectifying, subfamily J, member 16) (Inward rectifier K+ channel Kir5.1) (BIR9)                                                     | 12.2  | 7.9  |
| AA892316 | Transcribed sequences                                                                                                                                                                                                                                                                           | 27.4  | 18.7 |
| AA892317 | Transcribed sequence with weak similarity to protein ref:NP_446266.1 (R.norvegicus) Rho interacting protein 3 [Rattus norvegicus]                                                                                                                                                               | 23.9  | 4.7  |
| AA892318 | Transcribed sequence with weak similarity to protein ref:NP_113981.1 (R.norvegicus) matrin cyclophilin (matrin-cyp) [Rattus norvegicus]                                                                                                                                                         | 157.8 | 69.3 |
| AA892318 | Transcribed sequence with weak similarity to protein ref:NP_113981.1 (R.norvegicus) matrin cyclophilin (matrin-cyp) [Rattus norvegicus]                                                                                                                                                         | 64.4  | 22.7 |
| AA892319 | Transcribed sequences                                                                                                                                                                                                                                                                           | 51.4  | 15.9 |
| AA892331 | Transcribed sequences                                                                                                                                                                                                                                                                           | 13    | 7.7  |
| AA892335 | Transcribed sequences                                                                                                                                                                                                                                                                           | 15.5  | 13.8 |
| AA892339 | Transcribed sequences                                                                                                                                                                                                                                                                           | 8.5   | 7.1  |
| AA892345 | dimethylglycine dehydrogenase precursor                                                                                                                                                                                                                                                         | 4     | 3.8  |
| AA892346 | Transcribed sequence with strong similarity to protein ref:NP_037499.1 (H.sapiens) anaphase-promoting complex subunit 4 [Homo sapiens]                                                                                                                                                          | 6     | 3.3  |
| AA892353 | Transcribed sequence with moderate similarity to protein ref:NP_078863.1 (H.sapiens) hypothetical protein FLJ22353 [Homo sapiens]                                                                                                                                                               | 12.8  | 9.7  |
| AA892362 | Transcribed sequences                                                                                                                                                                                                                                                                           | 16.7  | 3.9  |
| AA892364 | Transcribed sequence with weak similarity to protein ref:NP_476540.1 (R.norvegicus) Wiskott-Aldrich syndrome protein interacting protein [Rattus norvegicus]                                                                                                                                    | 14.4  | 6.7  |
| AA892369 | Transcribed sequence with strong similarity to protein ref:NP_034761.1 (M.musculus) kinesin family member C3 [Mus musculus]                                                                                                                                                                     | 4.6   | 1.5  |
| AA892377 | Transcribed sequences                                                                                                                                                                                                                                                                           | 3.6   | 3.8  |
| AA892378 | Transcribed sequence with strong similarity to protein ref:NP_079838.1 (M.musculus) RIKEN cDNA 2010003O14 [Mus musculus]                                                                                                                                                                        | 17    | 11.6 |
| AA892380 | Transcribed sequence with strong similarity to protein ref:NP_033295.1 (M.musculus) serine palmitoyltransferase, long chain base subunit 1 [Mus musculus]                                                                                                                                       | 59.2  | 32.3 |
| AA892382 | camello-like 1                                                                                                                                                                                                                                                                                  | 6.2   | 3    |
| AA892391 | Transcribed sequence with weak similarity to protein sp:Q02975 (R.norvegicus) TC17_RAT Zinc finger protein 354A (Transcription factor 17) (Renal transcription factor Kid-1) (Kidney, ischemia, and developmentally regulated protein-1)                                                        | 12.7  | 5    |
| AA892394 | Transcribed sequence with moderate similarity to protein ref:NP_058893.1 (R.norvegicus) elav-type RNA-binding protein 3 [Rattus norvegicus]                                                                                                                                                     | 39.7  | 26   |
| AA892395 | aldolase B                                                                                                                                                                                                                                                                                      | 12.9  | 7.3  |
| AA892396 | Transcribed sequences                                                                                                                                                                                                                                                                           | 14.2  | 9.4  |

|          |                                                                                                                                                                                  |       |      |
|----------|----------------------------------------------------------------------------------------------------------------------------------------------------------------------------------|-------|------|
| AA892399 | Transcribed sequences                                                                                                                                                            | 15.9  | 7.5  |
| AA892400 | Transcribed sequence with moderate similarity to protein ref:NP_057084.1 (H.sapiens) CGI-47 protein; mitochondrial CCA-adding tRNA-nucleotidyltransferase [Homo sapiens]         | 33.2  | 20.4 |
| AA892404 | Na+ dependent glucose transporter 1                                                                                                                                              | 50.9  | 29.5 |
| AA892417 | Transcribed sequence with moderate similarity to protein pdb:1LBG (E. coli) B Chain B, Lactose Operon Repressor Bound To 21-Base Pair Symmetric Operator Dna, Alpha Carbons Only | 27.2  | 16   |
| AA892422 | Transcribed sequence with strong similarity to protein ref:NP_079829.1 (M.musculus) RIKEN cDNA 2410001P07; RIKEN cDNA 2410001P07 gene [Mus musculus]                             | 27.1  | 10.5 |
| AA892446 | Transcribed sequences                                                                                                                                                            | 33.8  | 4.4  |
| AA892468 | protease, serine, 8 (prostasin)                                                                                                                                                  | 31.1  | 11.6 |
| AA892468 | protease, serine, 8 (prostasin)                                                                                                                                                  | 9.1   | 6    |
| AA892483 | Transcribed sequences                                                                                                                                                            | 3.2   | 1    |
| AA892485 | dihydrolipoamide acetyltransferase                                                                                                                                               | 6.5   | 6.2  |
| AA892488 | Transcribed sequence with strong similarity to protein ref:NP_080428.1 (M.musculus) RIKEN cDNA 0610010D20 [Mus musculus]                                                         | 51.1  | 20.6 |
| AA892488 | Transcribed sequence with strong similarity to protein ref:NP_080428.1 (M.musculus) RIKEN cDNA 0610010D20 [Mus musculus]                                                         | 3.3   | 1    |
| AA892496 | chimerin (chimaerin) 2                                                                                                                                                           | 27    | 10.6 |
| AA892497 | xylosyltransferase 2                                                                                                                                                             | 28.6  | 22.9 |
| AA892500 | Transcribed sequences                                                                                                                                                            | 25.6  | 20.3 |
| AA892504 | Transcribed sequence with moderate similarity to protein ref:NP_002310.1 (H.sapiens) leucine-rich neuronal protein [Homo sapiens]                                                | 82.9  | 42.7 |
| AA892505 | Transcribed sequence with strong similarity to protein ref:NP_057005.1 (H.sapiens) divalent cation tolerant protein CUTA [Homo sapiens]                                          | 57.2  | 50.9 |
| AA892507 | Transcribed sequence with moderate similarity to protein pir:S63540 (H.sapiens) S63540 protein DS 1, 24K - human                                                                 | 23.8  | 16   |
| AA892511 | Transcribed sequence with weak similarity to protein ref:NP_077053.1 (R.norvegicus) calcium binding protein P22 [Rattus norvegicus]                                              | 8.5   | 1.6  |
| AA892512 | Transcribed sequence with weak similarity to protein pir:A60716 (R.norvegicus) A60716 somatotropin intron-related protein RDE.25 - rat (fragment)                                | 49    | 41   |
| AA892522 | Transcribed sequences                                                                                                                                                            | 21.8  | 4.6  |
| AA892526 | Transcribed sequence with moderate similarity to protein ref:NP_009198.2 (H.sapiens) expressed in activated T/LAK lymphocytes [Homo sapiens]                                     | 7.4   | 7    |
| AA892531 | Transcribed sequence with weak similarity to protein pir:B39066 (R.norvegicus) B39066 proline-rich protein 15 - rat                                                              | 45.7  | 12.5 |
| AA892538 | Transcribed sequences                                                                                                                                                            | 18.7  | 7.3  |
| AA892541 | Transcribed sequences                                                                                                                                                            | 6.3   | 4.9  |
| AA892541 | Transcribed sequences                                                                                                                                                            | 3.7   | 1.9  |
| AA892545 | Transcribed sequence with moderate similarity to protein ref:NP_032793.1 (M.musculus) organic cationic transporter-like 2 [Mus musculus]                                         | 27.5  | 10.5 |
| AA892547 | Transcribed sequence with moderate similarity to protein ref:NP_056517.1 (H.sapiens) hypothetical protein CL25022 [Homo sapiens]                                                 | 6.7   | 6.3  |
| AA892548 | alpha-tubulin                                                                                                                                                                    | 17.6  | 10.5 |
| AA892550 | Transcribed sequences                                                                                                                                                            | 4.2   | 2.6  |
| AA892551 | Transcribed sequence                                                                                                                                                             | 15.1  | 13.6 |
| AA892551 | Transcribed sequence                                                                                                                                                             | 7.2   | 5.2  |
| AA892553 | signal transducer and activator of transcription 1                                                                                                                               | 2.5   | 1.7  |
| AA892554 | Transcribed sequence with weak similarity to protein pir:DDRT (R.norvegicus) DDRT helix-destabilizing protein - rat                                                              | 28.3  | 24.2 |
| AA892559 | Ciliary neurotropic factor                                                                                                                                                       | 12.8  | 6.1  |
| AA892560 | Transcribed sequences                                                                                                                                                            | 6.2   | 4.1  |
| AA892561 | Transcribed sequence with moderate similarity to protein ref:NP_054758.1 (H.sapiens) PTD012 protein [Homo sapiens]                                                               | 18.2  | 19.2 |
| AA892562 | dyskeratosis congenita 1, dyskerin                                                                                                                                               | 19.3  | 10.5 |
| AA892562 | dyskeratosis congenita 1, dyskerin                                                                                                                                               | 15    | 8.3  |
| AA892564 | Transcribed sequences                                                                                                                                                            | 26.6  | 9.7  |
| AA892565 | Transcribed sequences                                                                                                                                                            | 23.1  | 16.4 |
| AA892568 | Transcribed sequence                                                                                                                                                             | 129.9 | 64.4 |
| AA892570 | Transcribed sequences                                                                                                                                                            | 7.2   | 6.9  |
| AA892572 | Transcribed sequence with strong similarity to protein ref:NP_079639.1 (M.musculus) RIKEN cDNA 1110001J03 [Mus musculus]                                                         | 46.4  | 15   |
| AA892578 | Transcribed sequences                                                                                                                                                            | 12    | 10.6 |
| AA892593 | Transcribed sequence with weak similarity to protein pir:S12207 (M.musculus) S12207 hypothetical protein (B2 element) - mouse                                                    | 6.8   | 1.6  |
| AA892598 | nucleostemin                                                                                                                                                                     | 24.8  | 13.1 |
| AA892602 | blocked early in transport 1 homolog (S. cerevisiae)-like                                                                                                                        | 14    | 11.2 |
| AA892607 | Transcribed sequences                                                                                                                                                            | 31.5  | 13.5 |
| AA892630 | Transcribed sequence with weak similarity to protein pir:I52331 (R.norvegicus) I52331 NAD+ ADP-ribosyltransferase (EC 2.4.2.30) - rat                                            | 10.6  | 16.6 |
| AA892632 | Transcribed sequences                                                                                                                                                            | 25.3  | 9.4  |
| AA892635 | ras-like protein                                                                                                                                                                 | 13.6  | 4.9  |
| AA892635 | ras-like protein                                                                                                                                                                 | 4.1   | 3.3  |
| AA892637 | Transcribed sequence with strong similarity to protein ref:NP_079441.1 (H.sapiens) hypothetical protein FLJ22637 [Homo sapiens]                                                  | 13.9  | 2.6  |
| AA892638 | Transcribed sequences                                                                                                                                                            | 10    | 6.7  |
| AA892639 | Transcribed sequences                                                                                                                                                            | 7.8   | 3.1  |
| AA892642 | Transcribed sequences                                                                                                                                                            | 21.3  | 8.8  |
| AA892645 | Transcribed sequence with weak similarity to protein sp:P38164 (S. cerevisiae) YBK4_YEAST Hypothetical 104.7 kDa protein in PKC1-RTG3 intergenic region                          | 17.3  | 14.9 |

|          |                                                                                                                                                                                                                                                                                                                  |       |      |
|----------|------------------------------------------------------------------------------------------------------------------------------------------------------------------------------------------------------------------------------------------------------------------------------------------------------------------|-------|------|
| AA892647 | Transcribed sequence with strong similarity to protein pir:I48404 (M.musculus) I48404 histone H4 (55AA) (1 is 3rd base in codon) - mouse (fragment)                                                                                                                                                              | 9.1   | 6.4  |
| AA892659 | Transcribed sequence with weak similarity to protein sp:Q62981 (R.norvegicus) OZF_RAT Zinc finger protein OZF (POZF-1)                                                                                                                                                                                           | 15.4  | 6.2  |
| AA892659 | Transcribed sequence with weak similarity to protein sp:Q62981 (R.norvegicus) OZF_RAT Zinc finger protein OZF (POZF-1)                                                                                                                                                                                           | 5.3   | 1.7  |
| AA892666 | Transcribed sequences                                                                                                                                                                                                                                                                                            | 65.2  | 26.5 |
| AA892675 | Transcribed sequence with weak similarity to protein ref:NP_075680.1 (M.musculus) meiotic recombination protein REC14 [Mus musculus]                                                                                                                                                                             | 10.9  | 7.3  |
| AA892677 | Transcribed sequences                                                                                                                                                                                                                                                                                            | 10.4  | 16.6 |
| AA892680 | peptidylprolyl cis-trans isomerase-like protein 3                                                                                                                                                                                                                                                                | 10.1  | 11.6 |
| AA892737 | Rattus norvegicus mixed-lineage kinase 1 mRNA, partial cds                                                                                                                                                                                                                                                       | 29.2  | 30.4 |
| AA892746 | Transcribed sequence                                                                                                                                                                                                                                                                                             | 2.6   | 1.8  |
| AA892753 | Transcribed sequence with moderate similarity to protein pir:T08701 (H.sapiens) T08701 hypothetical protein DKFZp564N123.1 - human (fragment)                                                                                                                                                                    | 48.9  | 11.9 |
| AA892754 | Transcribed sequences                                                                                                                                                                                                                                                                                            | 13.6  | 11.6 |
| AA892759 | synaptosomal-associated protein, 23 kD                                                                                                                                                                                                                                                                           | 20.8  | 4.5  |
| AA892761 | Transcribed sequence                                                                                                                                                                                                                                                                                             | 9.3   | 5.8  |
| AA892762 | Transcribed sequences                                                                                                                                                                                                                                                                                            | 3.6   | 2    |
| AA892774 | Transcribed sequences                                                                                                                                                                                                                                                                                            | 18.3  | 10.2 |
| AA892777 | Transcribed sequence with moderate similarity to protein sp:O75792 (H.sapiens) RNHL_HUMAN Ribonuclease HI large subunit (RNase HI large subunit) (RNase H(35)) (Ribonuclease H2) (RNase H2)                                                                                                                      | 16.2  | 11   |
| AA892778 | Transcribed sequences                                                                                                                                                                                                                                                                                            | 9.3   | 12.7 |
| AA892779 | Transcribed sequence with strong similarity to protein ref:NP_079685.1 (M.musculus) RIKEN cDNA 1110057H19 [Mus musculus]                                                                                                                                                                                         | 8.4   | 6.8  |
| AA892780 | Transcribed sequence with moderate similarity to protein ref:NP_057622.1 (H.sapiens) sirutin 7; sirutin (silent mating type information regulation 2, S.cerevisiae, homolog) 7; sirutin type 7; silent mating type information regulation 2, S.cerevisiae, homolog 7; sir2-related protein type 7 [Homo sapiens] | 73.6  | 23.8 |
| AA892789 | Transcribed sequence with moderate similarity to protein pdb:1LBG (E. coli) B Chain B, Lactose Operon Repressor Bound To 21-Base Pair Symmetric Operator Dna, Alpha Carbons Only                                                                                                                                 | 38.8  | 11.5 |
| AA892791 | Transcribed sequence with strong similarity to protein sp:P07903 (M.musculus) ERC1_MOUSE DNA EXCISION REPAIR PROTEIN ERCC-1                                                                                                                                                                                      | 73.3  | 51.1 |
| AA892798 | uterine sensitization-associated gene 1 protein                                                                                                                                                                                                                                                                  | 43.6  | 32.7 |
| AA892799 | Transcribed sequence with weak similarity to protein ref:NP_113808.1 (R.norvegicus) 3-phosphoglycerate dehydrogenase [Rattus norvegicus]                                                                                                                                                                         | 60.2  | 19.4 |
| AA892799 | Transcribed sequence with weak similarity to protein ref:NP_113808.1 (R.norvegicus) 3-phosphoglycerate dehydrogenase [Rattus norvegicus]                                                                                                                                                                         | 16.3  | 7.5  |
| AA892799 | Transcribed sequence with weak similarity to protein ref:NP_113808.1 (R.norvegicus) 3-phosphoglycerate dehydrogenase [Rattus norvegicus]                                                                                                                                                                         | 3.8   | 5.1  |
| AA892800 | parathymosin                                                                                                                                                                                                                                                                                                     | 7.6   | 3.8  |
| AA892805 | Transcribed sequence with strong similarity to protein pdb:1BGM (E. coli) O Chain O, Beta-Galactosidase (Chains I-P)                                                                                                                                                                                             | 23.5  | 13.2 |
| AA892805 | Transcribed sequence with strong similarity to protein pdb:1BGM (E. coli) O Chain O, Beta-Galactosidase (Chains I-P)                                                                                                                                                                                             | 4.2   | 2.5  |
| AA892810 | low density lipoprotein receptor-related protein associated protein 1                                                                                                                                                                                                                                            | 2.5   | 1.5  |
| AA892813 | Transcribed sequence with weak similarity to protein sp:Q9JKP5 (M.musculus) MBNL_MOUSE Muscleblind-like protein (Triplet-expansion RNA-binding protein)                                                                                                                                                          | 20.3  | 15.9 |
| AA892817 | Transcribed sequence with weak similarity to protein pir:S12207 (M.musculus) S12207 hypothetical protein (B2 element) - mouse                                                                                                                                                                                    | 39.6  | 14.2 |
| AA892820 | Transcribed sequence with weak similarity to protein pir:S70642 (R.norvegicus) S70642 ubiquitin ligase Nedd4 - rat (fragment)                                                                                                                                                                                    | 8.8   | 8.3  |
| AA892821 | aldo-keto reductase family 7, member A2 (aflatoxin aldehyde reductase)                                                                                                                                                                                                                                           | 39.5  | 27.7 |
| AA892821 | aldo-keto reductase family 7, member A2 (aflatoxin aldehyde reductase)                                                                                                                                                                                                                                           | 26.7  | 14.5 |
| AA892828 | Transcribed sequence with strong similarity to protein pir:S15892 (R.norvegicus) S15892 pyruvate dehydrogenase (lipoamide) (EC 1.2.4.1) beta chain - rat                                                                                                                                                         | 23.7  | 6    |
| AA892828 | Transcribed sequence with strong similarity to protein pir:S15892 (R.norvegicus) S15892 pyruvate dehydrogenase (lipoamide) (EC 1.2.4.1) beta chain - rat                                                                                                                                                         | 8.2   | 6.2  |
| AA892835 | Transcribed sequence with moderate similarity to protein sp:Q64152 (M.musculus) BTF3_MOUSE Transcription factor BTF3 (RNA polymerase B transcription factor 3)                                                                                                                                                   | 32    | 5.9  |
| AA892847 | Transcribed sequence with moderate similarity to protein ref:NP_032695.1 (M.musculus) N-acetyl galactosaminidase, alpha [Mus musculus]                                                                                                                                                                           | 23.9  | 13.3 |
| AA892849 | Transcribed sequence with weak similarity to protein sp:O09015 (R.norvegicus) MXI1_RAT MAX interacting protein 1 (MXI1 protein)                                                                                                                                                                                  | 9.7   | 5.9  |
| AA892855 | Transcribed sequence with strong similarity to protein pir:I68620 (M.musculus) I68620 rod outer segment membrane protein 1 - mouse                                                                                                                                                                               | 17.3  | 12.6 |
| AA892859 | procollagen-lysine, 2-oxoglutarate 5-dioxygenase 3                                                                                                                                                                                                                                                               | 170.9 | 92.2 |
| AA892860 | Transcribed sequence with strong similarity to protein pir:S25716 (M.musculus) S25716 Ras guanine nucleotide exchange factor son-of-sevenless (sos) 1 - mouse                                                                                                                                                    | 6.5   | 1.3  |
| AA892861 | Transcribed sequences                                                                                                                                                                                                                                                                                            | 4.2   | 3.7  |
| AA892863 | Transcribed sequences                                                                                                                                                                                                                                                                                            | 4.7   | 5.8  |
| AA892864 | monoglyceride lipase                                                                                                                                                                                                                                                                                             | 16.3  | 11   |
| AA892866 | Transcribed sequences                                                                                                                                                                                                                                                                                            | 10.5  | 9.2  |
| AA892871 | Transcribed sequences                                                                                                                                                                                                                                                                                            | 27.1  | 25.8 |
| AA892881 | Transcribed sequence                                                                                                                                                                                                                                                                                             | 12.8  | 8.7  |
| AA892888 | Transcribed sequence with moderate similarity to protein pdb:1LBG (E. coli) B Chain B, Lactose Operon Repressor Bound To 21-Base Pair Symmetric Operator Dna, Alpha Carbons Only                                                                                                                                 | 193.8 | 90.2 |
| AA892888 | Transcribed sequence with moderate similarity to protein pdb:1LBG (E. coli) B Chain B, Lactose Operon Repressor Bound To 21-Base Pair Symmetric Operator Dna, Alpha Carbons Only                                                                                                                                 | 101.8 | 43.8 |
| AA892895 | ribosomal protein S15                                                                                                                                                                                                                                                                                            | 310.5 | 79.4 |

|          |                                                                                                                                                                                                         |      |      |
|----------|---------------------------------------------------------------------------------------------------------------------------------------------------------------------------------------------------------|------|------|
| AA892897 | procollagen lysine, 2-oxoglutarate 5-dioxygenase 2                                                                                                                                                      | 49.4 | 36.5 |
| AA892916 | Transcribed sequence with weak similarity to protein ref:NP_477159.1 (D.melanogaster) Hmu-P1 [Drosophila melanogaster]                                                                                  | 12.4 | 9.5  |
| AA892919 | nucleolar phosphoprotein p130                                                                                                                                                                           | 52.3 | 26.6 |
| AA892920 | Transcribed sequences                                                                                                                                                                                   | 3.8  | 1.8  |
| AA892937 | Transcribed sequence with weak similarity to protein ref:NP_036049.1 (M.musculus) inhibitor of growth family, member 1 [Mus musculus]                                                                   | 24.8 | 20.9 |
| AA892940 | Transcribed sequence with weak similarity to protein sp:P05197 (R.norvegicus) EF2_RAT Elongation factor 2 (EF-2)                                                                                        | 32.5 | 16.4 |
| AA892945 | Transcribed sequence                                                                                                                                                                                    | 6.9  | 2.9  |
| AA892950 | Transcribed sequence with moderate similarity to protein pdb:1G5I (M.musculus) A Chain A, Crystal Structure Of The Accessory Subunit Of Murine Mitochondrial Polymerase Gamma                           | 5    | 2.4  |
| AA892953 | Transcribed sequence with weak similarity to protein sp:P43165 (R.norvegicus) CAH5_RAT Carbonic anhydrase VA, mitochondrial precursor (Carbonate dehydratase VA) (CA-VA)                                | 5.5  | 2.5  |
| AA892959 | Transcribed sequence with moderate similarity to protein ref:NP_115981.1 (H.sapiens) 1-aminocyclopropane-1-carboxylate synthase [Homo sapiens]                                                          | 69   | 35.8 |
| AA892960 | Transcribed sequence with strong similarity to protein ref:NP_080453.1 (M.musculus) RIKEN cDNA 1200011118 [Mus musculus]                                                                                | 36.9 | 35.9 |
| AA892967 | Transcribed sequences                                                                                                                                                                                   | 16.5 | 11.5 |
| AA892986 | Transcribed sequences                                                                                                                                                                                   | 11.5 | 14.4 |
| AA892987 | Transcribed sequence with moderate similarity to protein ref:NP_067416.1 (M.musculus) TATA box binding protein (Tbp)-associated factor, RNA polymerase I, C; transcription factor TAFI95 [Mus musculus] | 15.6 | 15.4 |
| AA892989 | Transcribed sequences                                                                                                                                                                                   | 9.6  | 3.3  |
| AA892997 | Transcribed sequences                                                                                                                                                                                   | 3    | 1.9  |
| AA893000 | Transcribed sequence with strong similarity to protein pir:T00335 (H.sapiens) T00335 hypothetical protein KIAA0564 - human (fragment)                                                                   | 18.4 | 13.9 |
| AA893004 | Transcribed sequences                                                                                                                                                                                   | 7.3  | 9.4  |
| AA893011 | Transcribed sequences                                                                                                                                                                                   | 58.8 | 29.8 |
| AA893014 | Transcribed sequences                                                                                                                                                                                   | 24.5 | 12.5 |
| AA893022 | Transcribed sequence with weak similarity to protein sp:P36970 (R.norvegicus) GSHH_RAT Phospholipid hydroperoxide glutathione peroxidase, mitochondrial precursor (PHGPx) (GPX-4)                       | 7    | 2.5  |
| AA893032 | Transcribed sequence with strong similarity to protein pdb:1BGM (E. coli) O Chain O, Beta-Galactosidase (Chains I-P)                                                                                    | 17   | 12.3 |
| AA893035 | HP33                                                                                                                                                                                                    | 3.3  | 1.4  |
| AA893039 | Transcribed sequences                                                                                                                                                                                   | 6.1  | 3.5  |
| AA893040 | Transcribed sequences                                                                                                                                                                                   | 49.2 | 30.5 |
| AA893040 | Transcribed sequences                                                                                                                                                                                   | 24.3 | 11.7 |
| AA893050 | Transcribed sequences                                                                                                                                                                                   | 18.7 | 13.2 |
| AA893059 | Transcribed sequence with moderate similarity to protein ref:NP_061207.1 (M.musculus) cytidine 5'-triphosphate synthase 2; CTP synthetase homolog [Mus musculus]                                        | 27.5 | 6.1  |
| AA893060 | Transcribed sequences                                                                                                                                                                                   | 21.3 | 7.6  |
| AA893074 | Transcribed sequences                                                                                                                                                                                   | 11.8 | 7.5  |
| AA893080 | Transcribed sequences                                                                                                                                                                                   | 33.9 | 29.7 |
| AA893087 | Transcribed sequence                                                                                                                                                                                    | 9.4  | 8.8  |
| AA893091 | Transcribed sequence with weak similarity to protein ref:NP_062566.1 (R.norvegicus) Kruppel associated box (KRAB) zinc finger 1 [Rattus norvegicus]                                                     | 5.2  | 5.8  |
| AA893105 | Transcribed sequences                                                                                                                                                                                   | 15.3 | 11.8 |
| AA893124 | Transcribed sequences                                                                                                                                                                                   | 7.6  | 9.2  |
| AA893147 | Transcribed sequences                                                                                                                                                                                   | 19.6 | 17.2 |
| AA893148 | Transcribed sequence with weak similarity to protein ref:NP_112622.1 (R.norvegicus) organic anion transporter [Rattus norvegicus]                                                                       | 35.4 | 15.4 |
| AA893158 | annexin A7                                                                                                                                                                                              | 10.2 | 5.8  |
| AA893160 | Transcribed sequences                                                                                                                                                                                   | 19.7 | 10.4 |
| AA893164 | Transcribed sequences                                                                                                                                                                                   | 30.2 | 15.9 |
| AA893165 | Transcribed sequences                                                                                                                                                                                   | 18.7 | 22.3 |
| AA893171 | Transcribed sequence with strong similarity to protein ref:NP_067474.1 (M.musculus) WD repeat domain 8; DD57 [Mus musculus]                                                                             | 17   | 15.7 |
| AA893172 | Transcribed sequences                                                                                                                                                                                   | 22.8 | 17.8 |
| AA893180 | Transcribed sequences                                                                                                                                                                                   | 23.2 | 18.8 |
| AA893183 | Transcribed sequence with strong similarity to protein ref:NP_079087.1 (H.sapiens) hypothetical protein FLJ12529 [Homo sapiens]                                                                         | 35.1 | 23.5 |
| AA893184 | Transcribed sequence with weak similarity to protein pir:S21766 (R.norvegicus) S21766 dihydrolipoamide S-acetyltransferase (EC 2.3.1.12) - rat (fragment)                                               | 4.2  | 5.7  |
| AA893188 | X-ray repair cross complementation (double-strand-break rejoining; Ku autoantigen, 80kD)                                                                                                                | 7.4  | 2.4  |
| AA893189 | glutathione reductase                                                                                                                                                                                   | 24.5 | 9.9  |
| AA893191 | phosphatidic acid phosphatase type 2c                                                                                                                                                                   | 24.4 | 12.9 |
| AA893191 | phosphatidic acid phosphatase type 2c                                                                                                                                                                   | 15.2 | 4.3  |
| AA893192 | Transcribed sequences                                                                                                                                                                                   | 29   | 19.6 |
| AA893193 | Transcribed sequences                                                                                                                                                                                   | 13.6 | 7.5  |
| AA893194 | Transcribed sequence with moderate similarity to protein ref:NP_115682.1 (H.sapiens) hypothetical protein MGC10974 [Homo sapiens]                                                                       | 9.3  | 3.7  |
| AA893195 | Transcribed sequences                                                                                                                                                                                   | 8.3  | 6.7  |
| AA893202 | Transcribed sequences                                                                                                                                                                                   | 31   | 16.4 |
| AA893205 | Transcribed sequences                                                                                                                                                                                   | 15.4 | 11.3 |
| AA893206 | Transcribed sequence with weak similarity to protein ref:NP_062289.1 (M.musculus) nuclear localization signals binding protein 1 [Mus musculus]                                                         | 14.8 | 11.9 |
| AA893208 | Transcribed sequences                                                                                                                                                                                   | 59.1 | 20.8 |
| AA893210 | beta prime COP                                                                                                                                                                                          | 27.3 | 17.7 |

|          |                                                                                                                                                                                   |       |      |
|----------|-----------------------------------------------------------------------------------------------------------------------------------------------------------------------------------|-------|------|
| AA893212 | Transcribed sequence with weak similarity to protein ref:NP_493253.1 (C.elegans) Y18D10A.16.p [Caenorhabditis elegans]                                                            | 21.4  | 1.6  |
| AA893213 | apolipoprotein M                                                                                                                                                                  | 47.2  | 31.2 |
| AA893216 | kidney-specific membrane protein                                                                                                                                                  | 12.4  | 2.8  |
| AA893216 | kidney-specific membrane protein                                                                                                                                                  | 7.7   | 8    |
| AA893219 | Glycine methyltransferase                                                                                                                                                         | 2.5   | 2.2  |
| AA893225 | Transcribed sequences                                                                                                                                                             | 60    | 43.8 |
| AA893230 | Transcribed sequence with weak similarity to protein sp:P02593 (R.norvegicus) CALM_HUMAN Calmodulin                                                                               | 15.8  | 11   |
| AA893234 | Transcribed sequences                                                                                                                                                             | 29.1  | 12.1 |
| AA893235 | Transcribed sequence with strong similarity to protein sp:Q61585 (M.musculus) G0S2_MOUSE Putative lymphocyte G0/G1 switch protein 2 (G0S2-like protein)                           | 1.6   | 0.8  |
| AA893237 | Transcribed sequence with moderate similarity to protein ref:NP_212133.1 (H.sapiens) hypothetical protein MBC3205 [Homo sapiens]                                                  | 22.5  | 16.7 |
| AA893239 | 2-hydroxyphytanoyl-CoA lyase                                                                                                                                                      | 5     | 3.4  |
| AA893242 | fatty acid Coenzyme A ligase, long chain 2                                                                                                                                        | 1     | 0.2  |
| AA893244 | Transcribed sequences                                                                                                                                                             | 23.5  | 21.2 |
| AA893247 | MAP/microtubule affinity-regulating kinase 3                                                                                                                                      | 19.1  | 4.5  |
| AA893273 | Transcribed sequences                                                                                                                                                             | 4.9   | 1.9  |
| AA893275 | Transcribed sequence with weak similarity to protein ref:NP_492228.1 (C.elegans) C09H6.3.p [Caenorhabditis elegans]                                                               | 13.8  | 9.4  |
| AA893314 | Transcribed sequence with weak similarity to protein ref:NP_037352.1 (R.norvegicus) cardiac ankyrin repeat protein [Rattus norvegicus]                                            | 2     | 0.6  |
| AA893320 | Transcribed sequences                                                                                                                                                             | 41.8  | 33.8 |
| AA893325 | ornithine aminotransferase                                                                                                                                                        | 20.8  | 11.9 |
| AA893327 | Transcribed sequences                                                                                                                                                             | 30.9  | 11.8 |
| AA893327 | Transcribed sequences                                                                                                                                                             | 4.6   | 7.7  |
| AA893330 | Transcribed sequence with weak similarity to protein ref:NP_502841.1 (C.elegans) Y73F8A.5.p [Caenorhabditis elegans]                                                              | 19.8  | 3.1  |
| AA893338 | hypothetical RNA binding protein RDA288                                                                                                                                           | 4.9   | 5.9  |
| AA893351 | Transcribed sequences                                                                                                                                                             | 9.4   | 10.6 |
| AA893357 | Transcribed sequences                                                                                                                                                             | 5.9   | 5.6  |
| AA893366 | Transcribed sequence                                                                                                                                                              | 6.4   | 4.3  |
| AA893384 | Transcribed sequence with moderate similarity to protein sp:P70671 (M.musculus) IRF3_MOUSE Interferon regulatory factor 3 (IRF-3)                                                 | 16.3  | 16.9 |
| AA893384 | Transcribed sequence with moderate similarity to protein sp:P70671 (M.musculus) IRF3_MOUSE Interferon regulatory factor 3 (IRF-3)                                                 | 4.3   | 2.2  |
| AA893390 | Transcribed sequences                                                                                                                                                             | 14    | 12.8 |
| AA893406 | Transcribed sequences                                                                                                                                                             | 38.1  | 22.6 |
| AA893422 | Transcribed sequences                                                                                                                                                             | 2.8   | 1.1  |
| AA893453 | Transcribed sequences                                                                                                                                                             | 3.3   | 1.7  |
| AA893454 | Transcribed sequences                                                                                                                                                             | 14.9  | 10.6 |
| AA893471 | Reelin                                                                                                                                                                            | 21.4  | 17.3 |
| AA893485 | Transcribed sequences                                                                                                                                                             | 24.5  | 13.4 |
| AA893495 | Transcribed sequence with strong similarity to protein pir:A40066 (R.norvegicus) A40066 corticosteroid-binding globulin precursor - rat                                           | 16    | 14.1 |
| AA893496 | acidic nuclear phosphoprotein 32 family, member A                                                                                                                                 | 11.3  | 10.6 |
| AA893505 | Transcribed sequences                                                                                                                                                             | 7.7   | 5.2  |
| AA893517 | Transcribed sequence with moderate similarity to protein pir:T42659 (H.sapiens) T42659 hypothetical protein DKFZp434K1815.1 - human (fragment)                                    | 7.5   | 1.9  |
| AA893529 | Transcribed sequence with moderate similarity to protein sp:Q92664 (H.sapiens) TF3A_HUMAN Transcription factor IIIA (Factor A) (TFIIIA)                                           | 17.3  | 12.7 |
| AA893534 | Transcribed sequences                                                                                                                                                             | 15.4  | 12.7 |
| AA893552 | kallistatin                                                                                                                                                                       | 27.8  | 11   |
| AA893562 | Transcribed sequence with weak similarity to protein sp:Q62806 (R.norvegicus) Z148_RAT Zinc finger protein 148 (Zinc finger DNA binding protein 89) (Transcription factor ZBP-89) | 56.1  | 35.8 |
| AA893565 | Transcribed sequences                                                                                                                                                             | 11.7  | 10.3 |
| AA893569 | Transcribed sequences                                                                                                                                                             | 19.4  | 18.7 |
| AA893579 | Transcribed sequences                                                                                                                                                             | 4     | 6    |
| AA893581 | Transcribed sequences                                                                                                                                                             | 66.8  | 21.7 |
| AA893584 | Transcribed sequence with weak similarity to protein ref:NP_500967.1 (C.elegans) Y73B6BL.30.p [Caenorhabditis elegans]                                                            | 21.3  | 14.3 |
| AA893590 | Transcribed sequence with strong similarity to protein sp:Q9Z1K6 (M.musculus) ARI2_MOUSE Ariadne-2 protein homolog (ARI-2) (Triad1 protein) (UbcM4-interacting protein 48)        | 9.1   | 8.1  |
| AA893592 | Transcribed sequence with weak similarity to protein pir:I56519 (R.norvegicus) I56519 taipoxin-associated calcium binding protein-49 precursor - rat                              | 24.6  | 14.7 |
| AA893593 | Transcribed sequences                                                                                                                                                             | 10.3  | 7.6  |
| AA893593 | Transcribed sequences                                                                                                                                                             | 5.8   | 2.9  |
| AA893596 | Transcribed sequence with weak similarity to protein ref:NP_446377.1 (R.norvegicus) proteasome (prosome macropain) 26S subunit, non-ATPase, 10 [Rattus norvegicus]                | 25.3  | 10.1 |
| AA893596 | Transcribed sequence with weak similarity to protein ref:NP_446377.1 (R.norvegicus) proteasome (prosome macropain) 26S subunit, non-ATPase, 10 [Rattus norvegicus]                | 9.2   | 3    |
| AA893602 | Transcribed sequences                                                                                                                                                             | 10.2  | 4.2  |
| AA893607 | Transcribed sequences                                                                                                                                                             | 7.7   | 8.5  |
| AA893611 | Transcribed sequence with moderate similarity to protein sp:O09015 (R.norvegicus) MXI1_RAT MAX interacting protein 1 (MXI1 protein)                                               | 25.8  | 15.1 |
| AA893612 | Transcribed sequence with weak similarity to protein prf:2107200A (R.norvegicus) 2107200A glycoprotein [Rattus norvegicus]                                                        | 238.6 | 62.7 |
| AA893618 | nuclear receptor subfamily 3, group C, member 1                                                                                                                                   | 12.3  | 13.3 |



|          |                                                                                                                                                                                                                                                                                                                         |       |      |
|----------|-------------------------------------------------------------------------------------------------------------------------------------------------------------------------------------------------------------------------------------------------------------------------------------------------------------------------|-------|------|
| AA893621 | Rattus norvegicus clone C201 intestinal epithelium proliferating cell-associated mRNA sequence                                                                                                                                                                                                                          | 110.8 | 32.1 |
| AA893626 | Transcribed sequence with weak similarity to protein ref:NP_112249.1 (R.norvegicus) guanine nucleotide-binding protein, beta-1# subunit [Rattus norvegicus]                                                                                                                                                             | 12.5  | 11.8 |
| AA893634 | Transcribed sequence with strong similarity to protein ref:NP_063930.1 (M.musculus) coatomer protein complex, subunit zeta 2; nonclathrin coat protein zeta2-COP [Mus musculus]                                                                                                                                         | 7.3   | 2.2  |
| AA893641 | Rattus norvegicus heterotrimeric G protein guanine nucleotide exchange factor Ric-8A mRNA, partial cds                                                                                                                                                                                                                  | 31.2  | 20.5 |
| AA893641 | Rattus norvegicus heterotrimeric G protein guanine nucleotide exchange factor Ric-8A mRNA, partial cds                                                                                                                                                                                                                  | 14.8  | 11.4 |
| AA893643 | Transcribed sequence with weak similarity to protein ref:NP_113981.1 (R.norvegicus) matrin cyclophilin (matrin-cyp) [Rattus norvegicus]                                                                                                                                                                                 | 76.6  | 37.6 |
| AA893658 | Transcribed sequence with weak similarity to protein ref:NP_444492.1 (M.musculus) hydroxysteroid (17-beta) dehydrogenase 11; hydroxysteroid 17-beta dehydrogenase 11 [Mus musculus]                                                                                                                                     | 3.2   | 1.1  |
| AA893659 | Transcribed sequences                                                                                                                                                                                                                                                                                                   | 31.6  | 17.6 |
| AA893662 | Transcribed sequences                                                                                                                                                                                                                                                                                                   | 48.4  | 27.3 |
| AA893663 | Transcribed sequences                                                                                                                                                                                                                                                                                                   | 33.7  | 17.1 |
| AA893664 | Transcribed sequences                                                                                                                                                                                                                                                                                                   | 33.6  | 10.6 |
| AA893667 | Transcribed sequence with weak similarity to protein ref:NP_291082.1 (M.musculus) arkadia [Mus musculus]                                                                                                                                                                                                                | 53.4  | 30.6 |
| AA893667 | Transcribed sequence with weak similarity to protein ref:NP_291082.1 (M.musculus) arkadia [Mus musculus]                                                                                                                                                                                                                | 26.3  | 18.4 |
| AA893671 | forkhead box O1A (rhabdomyosarcoma)                                                                                                                                                                                                                                                                                     | 36.5  | 16.4 |
| AA893682 | Transcribed sequence with strong similarity to protein ref:NP_055259.1 (H.sapiens) gamma tubulin ring complex protein (76p gene) [Homo sapiens]                                                                                                                                                                         | 18.1  | 7.4  |
| AA893688 | Transcribed sequences                                                                                                                                                                                                                                                                                                   | 6.9   | 4.3  |
| AA893690 | Transcribed sequence with strong similarity to protein ref:NP_062308.1 (M.musculus) neuronal protein 15.6 [Mus musculus]                                                                                                                                                                                                | 18.9  | 11.7 |
| AA893691 | Transcribed sequences                                                                                                                                                                                                                                                                                                   | 19.3  | 13.5 |
| AA893693 | Transcribed sequence                                                                                                                                                                                                                                                                                                    | 12.3  | 9.2  |
| AA893702 | transcobalamin II precursor                                                                                                                                                                                                                                                                                             | 156.3 | 38.3 |
| AA893711 | Transcribed sequence with weak similarity to protein ref:NP_036831.2 (R.norvegicus) DnaJ (Hsp40) homolog, subfamily B, member 9; Microvascular endothelial differentiation gene 1 [Rattus norvegicus]                                                                                                                   | 39.5  | 16.7 |
| AA893726 | Transcribed sequence with weak similarity to protein sp:P52944 (R.norvegicus) PDL1_RAT PDZ and LIM domain protein 1 (LIM domain protein CLP-36) (C-terminal LIM domain protein 1) (Elfin)                                                                                                                               | 8.7   | 2.4  |
| AA893733 | Transcribed sequence with strong similarity to protein sp:Q9QUM0 (M.musculus) ITAB_MOUSE Integrin alpha-IIb precursor (Platelet membrane glycoprotein IIb) (GPIIb) (CD41)                                                                                                                                               | 35.2  | 15.1 |
| AA893741 | Transcribed sequence with strong similarity to protein ref:NP_076343.1 (M.musculus) zinc finger protein 289; RIKEN cDNA 2310032E02 gene [Mus musculus]                                                                                                                                                                  | 61.2  | 25.1 |
| AA893742 | Transcribed sequences                                                                                                                                                                                                                                                                                                   | 7.9   | 7.2  |
| AA893743 | Transcribed sequences                                                                                                                                                                                                                                                                                                   | 30.6  | 10.7 |
| AA893743 | Transcribed sequences                                                                                                                                                                                                                                                                                                   | 21.7  | 14.5 |
| AA893749 | Transcribed sequence with weak similarity to protein prf:2206317A (H.sapiens) 2206317A protein SS isomerase [Homo sapiens]                                                                                                                                                                                              | 91.7  | 28.9 |
| AA893753 | Transcribed sequence with moderate similarity to protein ref:NP_002524.1 (H.sapiens) nuclear VCP-like; Nuclear valosin-containing protein-like [Homo sapiens]                                                                                                                                                           | 7.3   | 7.2  |
| AA893770 | Estrogen-regulated protein CBL20, 20.4kD                                                                                                                                                                                                                                                                                | 10.9  | 6.7  |
| AA893770 | Estrogen-regulated protein CBL20, 20.4kD                                                                                                                                                                                                                                                                                | 5.8   | 1.7  |
| AA893777 | Transcribed sequences                                                                                                                                                                                                                                                                                                   | 21.2  | 7.1  |
| AA893781 | Transcribed sequence with weak similarity to protein pir:S68418 (R.norvegicus) S68418 protein phosphatase 1M chain M110 isoform - rat (fragment)                                                                                                                                                                        | 7.4   | 5.8  |
| AA893781 | Transcribed sequence with weak similarity to protein pir:S68418 (R.norvegicus) S68418 protein phosphatase 1M chain M110 isoform - rat (fragment)                                                                                                                                                                        | 6     | 5.9  |
| AA893788 | Transcribed sequence with strong similarity to protein sp:Q61686 (M.musculus) CBX5_MOUSE Chromobox protein homolog 5 (Heterochromatin protein 1 homolog alpha) (HP1 alpha)                                                                                                                                              | 8.1   | 9.4  |
| AA893793 | Transcribed sequences                                                                                                                                                                                                                                                                                                   | 34.5  | 12.5 |
| AA893803 | Transcribed sequences                                                                                                                                                                                                                                                                                                   | 18.1  | 13.3 |
| AA893811 | Transcribed sequences                                                                                                                                                                                                                                                                                                   | 59    | 20.5 |
| AA893821 | Transcribed sequences                                                                                                                                                                                                                                                                                                   | 36.3  | 19.2 |
| AA893822 | Transcribed sequence with moderate similarity to protein sp:P43352 (M.musculus) RA52_MOUSE DNA REPAIR PROTEIN RAD52 HOMOLOG                                                                                                                                                                                             | 6.5   | 5    |
| AA893825 | Transcribed sequences                                                                                                                                                                                                                                                                                                   | 23.9  | 13.7 |
| AA893846 | Transcribed sequences                                                                                                                                                                                                                                                                                                   | 8.3   | 3.8  |
| AA893853 | androgen receptor-related apoptosis-associated protein CBL27                                                                                                                                                                                                                                                            | 20.8  | 8    |
| AA893857 | Transcribed sequences                                                                                                                                                                                                                                                                                                   | 4.9   | 6.9  |
| AA893869 | Transcribed sequence with weak similarity to protein ref:NP_508799.1 (C.elegans) F16H11.1.p [Caenorhabditis elegans]                                                                                                                                                                                                    | 28.4  | 20.2 |
| AA893871 | Transcribed sequences                                                                                                                                                                                                                                                                                                   | 24.3  | 15.4 |
| AA893885 | Transcribed sequences                                                                                                                                                                                                                                                                                                   | 28.1  | 10.1 |
| AA893905 | Transcribed sequence with strong similarity to protein ref:NP_080584.1 (M.musculus) RIKEN cDNA 0610037N01 [Mus musculus]                                                                                                                                                                                                | 22.7  | 17.5 |
| AA893905 | Transcribed sequence with strong similarity to protein ref:NP_080584.1 (M.musculus) RIKEN cDNA 0610037N01 [Mus musculus]                                                                                                                                                                                                | 5.6   | 3.9  |
| AA893924 | Transcribed sequence with weak similarity to protein sp:Q9JJZ6 (M.musculus) KLFD_MOUSE Krueppel-like factor 13 (Transcription factor BTEB3) (Basic transcription element binding protein 3) (BTE-binding protein 3) (RANTES factor of late activated T lymphocytes-1) (RFLAT-1) (Erythroid transcription factor FKLF-2) | 89.8  | 43.8 |
| AA893932 | Transcribed sequences                                                                                                                                                                                                                                                                                                   | 5.6   | 1.6  |
| AA893933 | Transcribed sequence                                                                                                                                                                                                                                                                                                    | 26    | 17.3 |

|          |                                                                                                                                                                                                                                 |      |      |
|----------|---------------------------------------------------------------------------------------------------------------------------------------------------------------------------------------------------------------------------------|------|------|
| AA893939 | Transcribed sequence with strong similarity to protein ref:NP_033195.1 (M.musculus) split hand/foot deleted gene 1 [Mus musculus]                                                                                               | 8.2  | 9.9  |
| AA893946 | Transcribed sequence with moderate similarity to protein sp:O43819 (H.sapiens) SCO2_HUMAN SCO2 protein homolog, mitochondrial precursor                                                                                         | 40   | 25.5 |
| AA893963 | Transcribed sequence with strong similarity to protein pir:S55552 (H.sapiens) S55552 LAR-interacting protein LIP1a - human                                                                                                      | 13   | 9.4  |
| AA893965 | Scm-related gene containing four mbt domains                                                                                                                                                                                    | 19.6 | 20.4 |
| AA893980 | Transcribed sequence with weak similarity to protein ref:NP_173516.1 (A.thaliana) putative RNA helicase [Arabidopsis thaliana]                                                                                                  | 51.8 | 41.7 |
| AA893980 | Transcribed sequence with weak similarity to protein ref:NP_173516.1 (A.thaliana) putative RNA helicase [Arabidopsis thaliana]                                                                                                  | 48.3 | 36.2 |
| AA893982 | Transcribed sequences                                                                                                                                                                                                           | 15.9 | 6.9  |
| AA893984 | Transcribed sequences                                                                                                                                                                                                           | 14.1 | 14.5 |
| AA893985 | Transcribed sequences                                                                                                                                                                                                           | 17.8 | 15.2 |
| AA893994 | Transcribed sequence                                                                                                                                                                                                            | 28.2 | 13.4 |
| AA894008 | Transcribed sequences                                                                                                                                                                                                           | 7.8  | 7    |
| AA894009 | Transcribed sequences                                                                                                                                                                                                           | 17.3 | 10.8 |
| AA894009 | Transcribed sequences                                                                                                                                                                                                           | 14.8 | 16.2 |
| AA894016 | Transcribed sequence with weak similarity to protein pir:I55595 (H.sapiens) I55595 splicing factor - human                                                                                                                      | 30.6 | 16   |
| AA894016 | Transcribed sequence with weak similarity to protein pir:I55595 (H.sapiens) I55595 splicing factor - human                                                                                                                      | 11   | 11   |
| AA894027 | Transcribed sequences                                                                                                                                                                                                           | 2.3  | 1.2  |
| AA894030 | Transcribed sequence with moderate similarity to protein ref:NP_060789.1 (H.sapiens) tyrosyl-DNA phosphodiesterase [Homo sapiens]                                                                                               | 13.4 | 7    |
| AA894037 | Transcribed sequence with strong similarity to protein pir:A44882 (M.musculus) A44882 embryogenesis protein H beta 58 - mouse                                                                                                   | 9.7  | 8.4  |
| AA894045 | Rattus norvegicus mRNA for NK receptor 1c7 (1c7 gene)                                                                                                                                                                           | 14.4 | 8.2  |
| AA894054 | Transcribed sequences                                                                                                                                                                                                           | 4.8  | 5.5  |
| AA894059 | Transcribed sequence with moderate similarity to protein pir:A55748 (M.musculus) A55748 protein kinase (EC 2.7.1.37) Sak-a - mouse                                                                                              | 5.6  | 8.1  |
| AA894070 | Transcribed sequence                                                                                                                                                                                                            | 12.8 | 11   |
| AA894080 | Transcribed sequences                                                                                                                                                                                                           | 34.8 | 33.4 |
| AA894080 | Transcribed sequences                                                                                                                                                                                                           | 19.1 | 18.7 |
| AA894084 | Transcribed sequences                                                                                                                                                                                                           | 4.9  | 3.5  |
| AA894086 | Transcribed sequence with strong similarity to protein ref:NP_219482.1 (H.sapiens) hypothetical protein MGC17552 [Homo sapiens]                                                                                                 | 26.3 | 9.9  |
| AA894086 | Transcribed sequence with strong similarity to protein ref:NP_219482.1 (H.sapiens) hypothetical protein MGC17552 [Homo sapiens]                                                                                                 | 12.7 | 9.6  |
| AA894087 | Eag-related gene member 2                                                                                                                                                                                                       | 5    | 1.7  |
| AA894088 | Transcribed sequences                                                                                                                                                                                                           | 12.7 | 8.8  |
| AA894092 | Transcribed sequence with weak similarity to protein pir:S36109 (M.musculus) S36109 osteoblast-specific factor 2 - mouse                                                                                                        | 5.5  | 4.9  |
| AA894096 | Transcribed sequences                                                                                                                                                                                                           | 8.9  | 6.5  |
| AA894104 | Transcribed sequence with weak similarity to protein ref:NP_112641.1 (R.norvegicus) attractin [Rattus norvegicus]                                                                                                               | 54.4 | 15.1 |
| AA894105 | Transcribed sequences                                                                                                                                                                                                           | 6.9  | 5.6  |
| AA894119 | Transcribed sequence with weak similarity to protein pir:DDRT (R.norvegicus) DDRT helix-destabilizing protein - rat                                                                                                             | 17   | 8.4  |
| AA894155 | Transcribed sequence with strong similarity to protein ref:NP_056516.1 (H.sapiens) hypothetical protein [Homo sapiens]                                                                                                          | 19.5 | 8.4  |
| AA894167 | Transcribed sequences                                                                                                                                                                                                           | 8.8  | 8.8  |
| AA894168 | Transcribed sequences                                                                                                                                                                                                           | 15   | 2.9  |
| AA894173 | Transcribed sequences                                                                                                                                                                                                           | 19.7 | 18.2 |
| AA894174 | Transcribed sequence with strong similarity to protein pir:A31568 (R.norvegicus) A31568 electron transfer flavoprotein alpha chain precursor - rat                                                                              | 21.3 | 12.2 |
| AA894174 | Transcribed sequence with strong similarity to protein pir:A31568 (R.norvegicus) A31568 electron transfer flavoprotein alpha chain precursor - rat                                                                              | 15   | 7.4  |
| AA894189 | Transcribed sequence with strong similarity to protein ref:NP_065194.1 (H.sapiens) gamma-tubulin complex component; KIAA1669 protein; similar to Xenopus gamma-tubulin interacting protein (yeast SPC98 homolog) [Homo sapiens] | 29.6 | 13.9 |
| AA894193 | Transcribed sequences                                                                                                                                                                                                           | 4.9  | 4.2  |
| AA894199 | Transcribed sequences                                                                                                                                                                                                           | 10   | 7.5  |
| AA894200 | Transcribed sequence with strong similarity to protein sp:Q64119 (R.norvegicus) MLES_RAT Myosin light chain alkali, smooth-muscle isoform (MLC3SM)                                                                              | 72.4 | 22.2 |
| AA894204 | Transcribed sequence with moderate similarity to protein ref:NP_444428.1 (M.musculus) sideroflexin 4 [Mus musculus]                                                                                                             | 3.5  | 4.6  |
| AA894207 | Rattus norvegicus focal adhesion kinase (FAK) mRNA, alternative 5'UTR                                                                                                                                                           | 15.1 | 14.2 |
| AA894210 | Transcribed sequences                                                                                                                                                                                                           | 10   | 11   |
| AA894226 | Transcribed sequences                                                                                                                                                                                                           | 15.3 | 10.4 |
| AA894226 | Transcribed sequences                                                                                                                                                                                                           | 4.8  | 3.3  |
| AA894232 | Transcribed sequences                                                                                                                                                                                                           | 15.2 | 10.7 |
| AA894233 | Transcribed sequences                                                                                                                                                                                                           | 20   | 13.5 |
| AA894233 | Transcribed sequences                                                                                                                                                                                                           | 12.6 | 8.8  |
| AA894234 | Transcribed sequence with strong similarity to protein ref:NP_079851.1 (M.musculus) RIKEN cDNA 2610042O14 [Mus musculus]                                                                                                        | 64.1 | 19.4 |
| AA894246 | Transcribed sequence with moderate similarity to protein ref:NP_067591.1 (R.norvegicus) prolactin-like protein H [Rattus norvegicus]                                                                                            | 4.4  | 2.8  |
| AA894258 | ubiquitin-conjugating enzyme E2D 3 (homologous to yeast UBC4/5)                                                                                                                                                                 | 6.5  | 5.9  |

|          |                                                                                                                                                                              |      |      |
|----------|------------------------------------------------------------------------------------------------------------------------------------------------------------------------------|------|------|
| AA894262 | Transcribed sequence with strong similarity to protein pir:JU0319 (M.musculus) JU0319 hypothetical 43.5K protein - mouse                                                     | 17.7 | 11.6 |
| AA894273 | R.norvegicus mRNA of retroviral origin                                                                                                                                       | 15.2 | 10.3 |
| AA894277 | Transcribed sequences                                                                                                                                                        | 30.6 | 31.2 |
| AA894296 | Transcribed sequence with strong similarity to protein pir:PMRT (R.norvegicus) PMRT phosphoglucomutase (EC 5.4.2.2) 1 - rat                                                  | 75.7 | 30.7 |
| AA894297 | Transcribed sequences                                                                                                                                                        | 8.4  | 8    |
| AA894298 | membrane metallo endopeptidase                                                                                                                                               | 20.8 | 13   |
| AA894304 | Complement component 3                                                                                                                                                       | 5.9  | 4.7  |
| AA894305 | Transcribed sequences                                                                                                                                                        | 23.9 | 12.8 |
| AA894316 | Transcribed sequences                                                                                                                                                        | 14.1 | 4.8  |
| AA894318 | Transcribed sequences                                                                                                                                                        | 11.7 | 6.9  |
| AA894321 | Transcribed sequence with weak similarity to protein ref:NP_062260.1 (R.norvegicus) Hrs [Rattus norvegicus]                                                                  | 20.5 | 15.3 |
| AA894332 | Transcribed sequences                                                                                                                                                        | 27.2 | 23.2 |
| AA894337 | Transcribed sequences                                                                                                                                                        | 18.1 | 8.7  |
| AA894338 | retinol dehydrogenase 10 (all-trans)                                                                                                                                         | 5.6  | 4.7  |
| AA894340 | Transcribed sequences                                                                                                                                                        | 22   | 18.9 |
| AA89552  | aggrecan 1                                                                                                                                                                   | 8.3  | 6.6  |
| AA899808 | Lysosomal associated membrane protein 1 (120 kDa)                                                                                                                            | 20.8 | 12.3 |
| AA899935 | platelet-activating factor acetylhydrolase alpha 2 subunit (PAF-AH alpha 2)                                                                                                  | 15.2 | 16.4 |
| AA900380 | tumor necrosis factor receptor superfamily, member 1b                                                                                                                        | 15.1 | 13.9 |
| AA900476 | Cbp/p300-interacting transactivator, with Glu/Asp-rich carboxy-terminal domain, 2                                                                                            | 42.9 | 25.2 |
| AA900476 | Cbp/p300-interacting transactivator, with Glu/Asp-rich carboxy-terminal domain, 2                                                                                            | 17   | 16.7 |
| AA900516 | peptidyl arginine deiminase, type 2                                                                                                                                          | 4.3  | 2    |
| AA900582 | alpha-2-macroglobulin                                                                                                                                                        | 66.9 | 44.4 |
| AA900601 | Transcribed sequences                                                                                                                                                        | 10.6 | 11.4 |
| AA900750 | pleiomorphic adenoma gene-like 1                                                                                                                                             | 16.5 | 23   |
| AA900769 | smooth muscle alpha-actin                                                                                                                                                    | 46.6 | 18.2 |
| AA900848 | Laminin chain beta 2                                                                                                                                                         | 29.4 | 15.5 |
| AA900850 | T-complex 1                                                                                                                                                                  | 17.2 | 11.6 |
| AA900850 | T-complex 1                                                                                                                                                                  | 13.8 | 7.1  |
| AA900900 | RalA binding protein 1                                                                                                                                                       | 26.8 | 22.3 |
| AA900989 | fatty acid Coenzyme A ligase, long chain 3                                                                                                                                   | 22.4 | 14.2 |
| AA924084 | tyrosine 3-monooxygenase/tryptophan 5 monooxygenase activation protein, beta polypeptide                                                                                     | 19.4 | 15.2 |
| AA924198 | mevalonate kinase                                                                                                                                                            | 8    | 3    |
| AA924267 | cytochrome P450, 4a10                                                                                                                                                        | 24   | 13.5 |
| AA924289 | insulin-like growth factor binding protein, acid labile subunit                                                                                                              | 14.6 | 10.5 |
| AA924591 | cytochrome P450 4A3                                                                                                                                                          | 16.6 | 7    |
| AA924772 | metallothionein 3                                                                                                                                                            | 15.8 | 13.7 |
| AA924925 | ER transmembrane protein Dri 42                                                                                                                                              | 7.2  | 3.1  |
| AA925138 | potassium channel, subfamily K, member 3                                                                                                                                     | 2.8  | 1.9  |
| AA925246 | cathepsin K                                                                                                                                                                  | 10.8 | 5.4  |
| AA925248 | sodium channel, voltage-gated, type 6, alpha polypeptide                                                                                                                     | 4.6  | 4.3  |
| AA925252 | Transcribed sequences                                                                                                                                                        | 4.7  | 6.1  |
| AA925300 | Transcribed sequence with strong similarity to protein sp:Q61084 (M.musculus) M3K3_MOUSE MITOGEN-ACTIVATED PROTEIN KINASE KINASE 3 (MAPK/ERK KINASE KINASE 3) (MEK KINASE 3) | 36.2 | 14.7 |
| AA925424 | fatty acid Coenzyme A ligase, long chain 4                                                                                                                                   | 4.5  | 3.1  |
| AA925495 | calcium/calmodulin-dependent protein kinase II, delta                                                                                                                        | 23.3 | 8    |
| AA925506 | guanine nucleotide binding protein, gamma 7                                                                                                                                  | 36.4 | 25.7 |
| AA925529 | Transcribed sequence                                                                                                                                                         | 25   | 21.9 |
| AA925717 | Transcribed sequences                                                                                                                                                        | 20.4 | 14.8 |
| AA925752 | cd36 antigen                                                                                                                                                                 | 5    | 3.1  |
| AA925846 | BH3 interacting domain 3                                                                                                                                                     | 5.9  | 3    |
| AA925880 | Transcribed sequence with moderate similarity to protein ref:NP_113668.1 (H.sapiens) hypothetical protein AD034 [Homo sapiens]                                               | 5.8  | 5.8  |
| AA925887 | phosphate cytidylyltransferase 1, choline, alpha isoform                                                                                                                     | 18.7 | 15.9 |
| AA926149 | Catalase                                                                                                                                                                     | 14.9 | 8.2  |
| AA926149 | Catalase                                                                                                                                                                     | 3.8  | 3.1  |
| AA926193 | sulfotransferase family, cytosolic, 1C, member 2                                                                                                                             | 9.6  | 9.5  |
| AA926292 | trans-golgi network protein 1                                                                                                                                                | 31.1 | 21.2 |
| AA933181 | Transcribed sequence with weak similarity to protein prf:2108338A (R.norvegicus) 2108338A neurotrimin [Rattus norvegicus]                                                    | 4.9  | 2.1  |
| AA942685 | cytosolic cysteine dioxygenase 1                                                                                                                                             | 18.2 | 17.1 |
| AA943102 | GTP cyclohydrolase 1                                                                                                                                                         | 5.8  | 1.9  |
| AA943150 | demethyl-Q 7                                                                                                                                                                 | 7.9  | 3.6  |
| AA943331 | neuroblastoma RAS viral (v-ras) oncogene homolog                                                                                                                             | 24.2 | 15.2 |
| AA943387 | calcium modulating ligand                                                                                                                                                    | 24.7 | 15.1 |
| AA943784 | ATPase, Ca++ transporting, plasma membrane 2                                                                                                                                 | 3.3  | 2.2  |
| AA943872 | adducin 1, alpha                                                                                                                                                             | 36.1 | 13.7 |
| AA943872 | adducin 1, alpha                                                                                                                                                             | 1.7  | 0.7  |
| AA943892 | angiotensinogen                                                                                                                                                              | 41.4 | 23.3 |
| AA944007 | nucleobindin                                                                                                                                                                 | 69.6 | 18.5 |
| AA944014 | v-jun sarcoma virus 17 oncogene homolog (avian)                                                                                                                              | 22.4 | 16.5 |
| AA944025 | isocitrate dehydrogenase 1                                                                                                                                                   | 18.2 | 8.5  |
| AA944156 | B-cell translocation gene 2                                                                                                                                                  | 38.5 | 24.7 |
| AA944177 | high mobility group box 1                                                                                                                                                    | 73   | 25.4 |
| AA944177 | high mobility group box 1                                                                                                                                                    | 16.9 | 10.1 |

|          |                                                                                                                                                                                                                                           |      |      |
|----------|-------------------------------------------------------------------------------------------------------------------------------------------------------------------------------------------------------------------------------------------|------|------|
| AA944254 | G protein-coupled receptor kinase 2, groucho gene related (Drosophila)                                                                                                                                                                    | 24.5 | 25.4 |
| AA944361 | Transcribed sequences                                                                                                                                                                                                                     | 20.3 | 10.6 |
| AA944422 | calponin 3, acidic                                                                                                                                                                                                                        | 2.4  | 0.8  |
| AA944423 | cis-Golgi matrix protein GM130                                                                                                                                                                                                            | 48   | 18.2 |
| AA944973 | Transcribed sequence with strong similarity to protein sp:P48721 (R.norvegicus) GR75_RAT Stress-70 protein, mitochondrial precursor (75 kDa glucose regulated protein) (GRP 75) (Peptide-binding protein 74) (PBP74) (MTHSP70) (Mortalin) | 28.1 | 20.4 |
| AA945050 | sulfotransferase family, cytosolic, 2A, dehydroepiandrosterone (DHEA) -preferring, member 1                                                                                                                                               | 6.2  | 3    |
| AA945082 | glutathione-S-transferase, alpha type2                                                                                                                                                                                                    | 3.5  | 2.7  |
| AA945128 | Serine protease inhibitor                                                                                                                                                                                                                 | 23   | 11.7 |
| AA945143 | tryptophan 2,3-dioxygenase                                                                                                                                                                                                                | 5.3  | 4    |
| AA945169 | Transthyretin (prealbumin, amyloidosis type I)                                                                                                                                                                                            | 30.7 | 24.5 |
| AA945171 | apolipoprotein C-IV                                                                                                                                                                                                                       | 3.1  | 2.2  |
| AA945321 | Albumin                                                                                                                                                                                                                                   | 2.8  | 1.6  |
| AA945442 | Glucokinase regulatory protein                                                                                                                                                                                                            | 22.9 | 15.7 |
| AA945569 | pregnancy-zone protein                                                                                                                                                                                                                    | 11.8 | 7.1  |
| AA945571 | Cytochrome P450, subfamily IIC6                                                                                                                                                                                                           | 2.8  | 2.9  |
| AA945573 | cytochrome P450, 2c39                                                                                                                                                                                                                     | 10.3 | 7.2  |
| AA945583 | hydroxysteroid (17-beta) dehydrogenase 10                                                                                                                                                                                                 | 7.3  | 5.3  |
| AA945585 | ATPase inhibitor                                                                                                                                                                                                                          | 9.6  | 8.4  |
| AA945589 | sulfotransferase, hydroxysteroid preferring 2                                                                                                                                                                                             | 48.6 | 26.3 |
| AA945704 | Transcribed sequences                                                                                                                                                                                                                     | 16.3 | 16.5 |
| AA945737 | Chemokine receptor (LCR1)                                                                                                                                                                                                                 | 17.5 | 8.4  |
| AA945867 | v-jun sarcoma virus 17 oncogene homolog (avian)                                                                                                                                                                                           | 11.5 | 10.3 |
| AA945907 | natriuretic peptide receptor 3                                                                                                                                                                                                            | 10.3 | 5.8  |
| AA946108 | laminin 5 alpha 3                                                                                                                                                                                                                         | 8.5  | 4.8  |
| AA946251 | G protein-coupled receptor kinase 5                                                                                                                                                                                                       | 14.1 | 3.1  |
| AA946292 | CCAAT/enhancerbinding, protein (C/EBP) delta                                                                                                                                                                                              | 31.7 | 11.3 |
| AA946368 | cd36 antigen                                                                                                                                                                                                                              | 15.5 | 7.4  |
| AA946369 | Transcribed sequence with weak similarity to protein sp:O54940 (M.musculus) NIP2_MOUSE BCL2/ADENOVIRUS E1B 19-KDA PROTEIN-INTERACTING PROTEIN 2                                                                                           | 5.1  | 2.2  |
| AA946384 | mannosidase, alpha, class 2C, member 1                                                                                                                                                                                                    | 41.4 | 19.7 |
| AA946439 | Transcribed sequence with strong similarity to protein pir:I48404 (M.musculus) I48404 histone H4 (55AA) (1 is 3rd base in codon) - mouse (fragment)                                                                                       | 17.4 | 11.3 |
| AA946488 | protein tyrosine phosphatase 2E                                                                                                                                                                                                           | 12.3 | 13.8 |
| AA946503 | lipocalin 2                                                                                                                                                                                                                               | 34.3 | 12.2 |
| AA946532 | ATP-binding cassette, sub-family D (ALD), member 3                                                                                                                                                                                        | 42.3 | 23.6 |
| AA946542 | prolactin-like protein D                                                                                                                                                                                                                  | 6.2  | 9.9  |
| AA946542 | prolactin-like protein D                                                                                                                                                                                                                  | 5.2  | 7.3  |
| AA955167 | myristoylated alanine rich protein kinase C substrate                                                                                                                                                                                     | 76.2 | 16.8 |
| AA955167 | myristoylated alanine rich protein kinase C substrate                                                                                                                                                                                     | 3.3  | 0.9  |
| AA955182 | GATA-binding protein 6                                                                                                                                                                                                                    | 8.8  | 7.3  |
| AA955182 | GATA-binding protein 6                                                                                                                                                                                                                    | 5.8  | 1.8  |
| AA955302 | myosin IE                                                                                                                                                                                                                                 | 8.4  | 10.9 |
| AA955388 | ATPase, Ca++ transporting, plasma membrane 2                                                                                                                                                                                              | 8.7  | 8.5  |
| AA955477 | Transcribed sequence with moderate similarity to protein sp:P49138 (M.musculus) MKK2_MOUSE MAP kinase-activated protein kinase 2 (MAPK-activated protein kinase 2) (MAPKAP kinase 2) (MAPKAPK-2)                                          | 40.3 | 18.2 |
| AA955477 | Transcribed sequence with moderate similarity to protein sp:P49138 (M.musculus) MKK2_MOUSE MAP kinase-activated protein kinase 2 (MAPK-activated protein kinase 2) (MAPKAP kinase 2) (MAPKAPK-2)                                          | 1.2  | 0.3  |
| AA955554 | splicing factor, arginine/serine-rich 5                                                                                                                                                                                                   | 11.2 | 8.1  |
| AA955808 | protein phosphatase V                                                                                                                                                                                                                     | 10.1 | 6.7  |
| AA955859 | splicing factor, arginine/serine-rich (transformer 2 Drosophila homolog) 10                                                                                                                                                               | 15.8 | 14   |
| AA955950 | Transcribed sequence with strong similarity to protein ref:NP_057180.1 (H.sapiens) HSPC038 protein [Homo sapiens]                                                                                                                         | 6.2  | 8    |
| AA956066 | prenylated SNARE protein                                                                                                                                                                                                                  | 10.2 | 7.7  |
| AA956149 | neurexin 1                                                                                                                                                                                                                                | 72.3 | 48.3 |
| AA956332 | rabaptin 5                                                                                                                                                                                                                                | 5.1  | 1.3  |
| AA956437 | Transcribed sequence with weak similarity to protein pir:A55190 (R.norvegicus) A55190 transitional endoplasmic reticulum ATPase (EC 3.6.1.-) [validated] - rat                                                                            | 23.3 | 21.4 |
| AA956437 | Transcribed sequence with weak similarity to protein pir:A55190 (R.norvegicus) A55190 transitional endoplasmic reticulum ATPase (EC 3.6.1.-) [validated] - rat                                                                            | 5.5  | 5.8  |
| AA956507 | P450 (cytochrome) oxidoreductase                                                                                                                                                                                                          | 8.6  | 6.4  |
| AA956855 | nuclear receptor subfamily 1, group H, member 2                                                                                                                                                                                           | 12.8 | 6.2  |
| AA956930 | endothelin converting enzyme 1                                                                                                                                                                                                            | 13.9 | 8.7  |
| AA956941 | transcription factor 4                                                                                                                                                                                                                    | 22   | 9.7  |
| AA957003 | S100 calcium-binding protein A8 (calgranulin A)                                                                                                                                                                                           | 13.5 | 12.7 |
| AA957201 | lamin B1                                                                                                                                                                                                                                  | 4.2  | 4.4  |
| AA957892 | calcium channel beta 1 subunit                                                                                                                                                                                                            | 59   | 24.7 |
| AA957917 | solute carrier family 7, member 1                                                                                                                                                                                                         | 11.5 | 5    |
| AA957923 | mast cell protease 2                                                                                                                                                                                                                      | 8.6  | 11   |
| AA957930 | microtubule-associated protein tau                                                                                                                                                                                                        | 20.4 | 6.2  |
| AA957961 | unr protein                                                                                                                                                                                                                               | 46.9 | 16.4 |
| AA958273 | Transcribed sequences                                                                                                                                                                                                                     | 20.3 | 10.3 |
| AA958273 | Stratagene (cat.#936501) Rattus norvegicus cDNA clone pUC18/P1F-6 3', mRNA sequence [Rattus norvegicus]                                                                                                                                   | 3.1  | 1.4  |
| AA958274 | Stratagene (cat.#936501) Rattus norvegicus cDNA clone pUC18/P1F-6 3', mRNA sequence [Rattus norvegicus]                                                                                                                                   | 18.8 | 10.8 |

|          |                                                                                                                                          |       |      |
|----------|------------------------------------------------------------------------------------------------------------------------------------------|-------|------|
| AA963091 | matrin cyclophilin (matrin-cyp)                                                                                                          | 2.6   | 1.3  |
| AA963267 | RNA polymerase I (127 kDa subunit)                                                                                                       | 5     | 3.9  |
| AA963447 | Transcribed sequence with strong similarity to protein ref:NP_113794.1 (R.norvegicus) phosphatase and tensin homolog [Rattus norvegicus] | 9     | 7.2  |
| AA963449 | cytochrome P450, subfamily 51                                                                                                            | 5.6   | 5.2  |
| AA963682 | ankyrin 3 (G)                                                                                                                            | 8.9   | 7.1  |
| AA963839 | diaphorase 1                                                                                                                             | 5.2   | 1.9  |
| AA963857 | Glypican 3                                                                                                                               | 16.3  | 10.5 |
| AA964055 | histone 2b                                                                                                                               | 8.1   | 5.7  |
| AA964530 | ADP-ribosylation factor 2                                                                                                                | 19.6  | 12.5 |
| AA964615 | LIM homeobox protein 5                                                                                                                   | 23.5  | 18.6 |
| AA964849 | ADP-ribosyltransferase 1                                                                                                                 | 26.8  | 12.2 |
| AA965119 | Transcribed sequence with strong similarity to protein ref:NP_113722.1 (R.norvegicus) wilms tumor 1 [Rattus norvegicus]                  | 10.3  | 10.4 |
| AA965132 | solute carrier family 12, member 3                                                                                                       | 8.3   | 2.8  |
| AA965147 | heterogeneous nuclear ribonucleoprotein A1                                                                                               | 24.1  | 6.6  |
| AA965261 | H2A histone family, member Y                                                                                                             | 22.3  | 15.6 |
| AA996401 | high mobility group box 2                                                                                                                | 21    | 13.6 |
| AA996446 | achaete-scute complex homolog-like 1 (Drosophila)                                                                                        | 4.4   | 1.5  |
| AA996484 | aldehyde dehydrogenase family 3, subfamily A2                                                                                            | 36.2  | 29.7 |
| AA996484 | aldehyde dehydrogenase family 3, subfamily A2                                                                                            | 10.6  | 9.4  |
| AA996551 | vesicular inhibitory amino acid transporter                                                                                              | 13.7  | 8.3  |
| AA997367 | p21 (CDKN1A)-activated kinase 3                                                                                                          | 7     | 3.7  |
| AA997410 | bone morphogenetic protein 2                                                                                                             | 6.1   | 7.3  |
| AA997476 | antisense basic fibroblast growth factor                                                                                                 | 7.6   | 6.2  |
| AA997526 | lectin, mannose-binding, 1                                                                                                               | 29.6  | 16.5 |
| AA997614 | cytochrome P450, subfamily 51                                                                                                            | 18.1  | 25.5 |
| AA997865 | thymosin beta-like protein                                                                                                               | 5.6   | 4.8  |
| AA997886 | cytochrome P450 2d18                                                                                                                     | 112.7 | 40.8 |
| AA997968 | RNB6                                                                                                                                     | 14.5  | 12.3 |
| AA998164 | Cyclin B1                                                                                                                                | 18.3  | 16.3 |
| AA998229 | alpha-fetoprotein                                                                                                                        | 7.3   | 6.7  |
| AA998338 | phospholipase D gene 2                                                                                                                   | 7.7   | 4.2  |
| AA998446 | phosphatidylinositol transfer protein, beta                                                                                              | 42.2  | 13.6 |
| AA998683 | heat shock 27kDa protein 1                                                                                                               | 2.9   | 1.5  |
| AA998882 | nucleolar phosphoprotein p130                                                                                                            | 14.5  | 8.8  |
| AA998983 | leptin receptor                                                                                                                          | 4.7   | 7.8  |
| AA999168 | Transcribed sequence with strong similarity to protein ref:NP_080337.1 (M.musculus) RIKEN cDNA 2900010I05 [Mus musculus]                 | 21.7  | 12.3 |
| AB000098 | MIPP65 protein                                                                                                                           | 63.2  | 58.4 |
| AB000098 | MIPP65 protein                                                                                                                           | 11.6  | 9.5  |
| AB000113 | solute carrier family 7, member 3                                                                                                        | 9.2   | 7.9  |
| AB000199 | CCA2 protein                                                                                                                             | 12.5  | 7.5  |
| AB000216 | Cca3 protein                                                                                                                             | 3.9   | 1.6  |
| AB000217 | GATA-binding protein 3                                                                                                                   | 22.9  | 21.1 |
| AB000362 | cold inducible RNA-binding protein                                                                                                       | 6.1   | 8.8  |
| AB000507 | aquaporin 7                                                                                                                              | 17.8  | 13.7 |
| AB000517 | CDP-diacylglycerol synthase (phosphatidate cytidyltransferase) 1                                                                         | 44.4  | 18.5 |
| AB000776 | semaphorin 6B                                                                                                                            | 8.4   | 3    |
| AB000778 | phospholipase D gene 1                                                                                                                   | 15.8  | 13.1 |
| AB000928 | zona pellucida glycoprotein 1                                                                                                            | 39.4  | 17.1 |
| AB000929 | zona pellucida 2 glycoprotein                                                                                                            | 61.9  | 27.3 |
| AB001349 | Steroidogenic acute regulatory protein                                                                                                   | 9.3   | 6.4  |
| AB001452 | Sck                                                                                                                                      | 5.4   | 2.1  |
| AB001453 | N-Shc                                                                                                                                    | 46    | 24.1 |
| AB001576 | NTAK alpha2-1p                                                                                                                           | 16.2  | 17.2 |
| AB001982 | growth hormone secretagogue receptor                                                                                                     | 20.7  | 15.6 |
| AB001982 | growth hormone secretagogue receptor                                                                                                     | 16.3  | 21.9 |
| AB002111 | peroxisomal biogenesis factor 12                                                                                                         | 3.5   | 1.5  |
| AB002169 | RT1.P1 pseudogene for TL antigen                                                                                                         | 36.5  | 26.2 |
| AB002393 | histidine ammonia lyase                                                                                                                  | 10.5  | 6.1  |
| AB002393 | histidine ammonia lyase                                                                                                                  | 3.4   | 1.5  |
| AB002406 | ruvB-like protein 1                                                                                                                      | 14.5  | 18.3 |
| AB002558 | glycerol 3-phosphate dehydrogenase                                                                                                       | 4.6   | 2.4  |
| AB002561 | fibroblast growth factor 16                                                                                                              | 20.8  | 15.1 |
| AB002584 | beta-alanine-pyruvate aminotransferase                                                                                                   | 6.7   | 7    |
| AB002801 | cyclic nucleotide gated channel alpha 3                                                                                                  | 8.4   | 6.3  |
| AB003091 | IRF-2                                                                                                                                    | 6.7   | 2.5  |
| AB003104 | beaded filament structural protein 1, filensin                                                                                           | 12.4  | 9.3  |
| AB003357 | Serine/threonine kinase 2                                                                                                                | 27.9  | 20   |
| AB003400 | D-amino acid oxidase                                                                                                                     | 5.5   | 3.2  |
| AB003478 | UDP-Gal:betaGlcNAc beta 1,3-galactosyltransferase, polypeptide 4                                                                         | 25.9  | 16   |
| AB003478 | UDP-Gal:betaGlcNAc beta 1,3-galactosyltransferase, polypeptide 4                                                                         | 10.4  | 14.4 |
| AB003726 | homer, neuronal immediate early gene, 1                                                                                                  | 16.5  | 2.2  |
| AB003753 | sulfur protein B2E                                                                                                                       | 32.3  | 12   |
| AB003753 | sulfur protein B2E                                                                                                                       | 14.2  | 13.1 |
| AB003991 | SNAP-25A                                                                                                                                 | 51    | 22   |
| AB003991 | synaptosomal-associated protein                                                                                                          | 15.4  | 12.3 |
| AB003992 | synaptosomal-associated protein                                                                                                          | 7.9   | 6.8  |

|          |                                                                                                |      |      |
|----------|------------------------------------------------------------------------------------------------|------|------|
| AB004056 | BarH-class homeodomain transcription factor                                                    | 10.3 | 3.4  |
| AB004096 | cytochrome P450, subfamily 51                                                                  | 5    | 4.7  |
| AB004267 | pregnancy upregulated non-ubiquitously expressed CaM kinase                                    | 11.2 | 4.2  |
| AB004267 | pregnancy upregulated non-ubiquitously expressed CaM kinase                                    | 6.9  | 1    |
| AB004276 | protocadherin 4                                                                                | 10.3 | 8.9  |
| AB004277 | protocadherin 5                                                                                | 63.5 | 21.5 |
| AB004278 | protocadherin 2                                                                                | 9    | 7.2  |
| AB004329 | acetyl-Coenzyme A carboxylase beta                                                             | 4.6  | 3.5  |
| AB004559 | solute carrier family 22 (organic anion transporter), member 6                                 | 9.5  | 5    |
| AB004638 | fibroblast growth factor 18                                                                    | 6.4  | 5.3  |
| AB004831 | immunoglobulin-associated beta                                                                 | 14.5 | 13.1 |
| AB005146 | PSD-95 binding protein                                                                         | 4.2  | 1.3  |
| AB005540 | PCTAIRE2                                                                                       | 15.9 | 11.9 |
| AB005540 | PCTAIRE2                                                                                       | 6.2  | 5.3  |
| AB005541 | PCTAIRE3                                                                                       | 2    | 0.4  |
| AB005547 | aquaporin 8                                                                                    | 6.3  | 3    |
| AB005549 | three-PDZ containing protein similar to C. elegans PAR3 (partitioning defect)                  | 1.7  | 0.9  |
| AB005743 | cd36 antigen                                                                                   | 7.6  | 7.7  |
| AB005743 | cd36 antigen                                                                                   | 3.2  | 1.9  |
| AB005900 | oxidised low density lipoprotein (lectin-like) receptor 1                                      | 16.6 | 4.5  |
| AB006007 | Steroidogenic acute regulatory protein                                                         | 12.8 | 9.3  |
| AB006013 | regulator of G-protein signaling 8                                                             | 13.8 | 11.4 |
| AB006137 | Alpha1,2-fucosyltransferase a                                                                  | 6    | 2.8  |
| AB006138 | fucosyltransferase 2                                                                           | 4.8  | 2    |
| AB006461 | neurochondrin                                                                                  | 29   | 13.5 |
| AB006607 | choline/ethanolamine kinase                                                                    | 80.9 | 55.6 |
| AB006607 | choline/ethanolamine kinase                                                                    | 43   | 19.1 |
| AB006710 | 6-phosphofructo-2-kinase/fructose-2,6-biphosphatase 3                                          | 11.6 | 6.4  |
| AB006880 | ischemia related factor vof-16                                                                 | 9.4  | 10.3 |
| AB006881 | ischemia related factor vof-16                                                                 | 27.1 | 15.6 |
| AB006883 | PMF31                                                                                          | 3.4  | 1.6  |
| AB006914 | thyroid hormone receptor interactor 10                                                         | 21.7 | 6.8  |
| AB007601 | Rattus norvegicus mRNA for sproutin, partial sequence                                          | 39   | 23.3 |
| AB007688 | homer, neuronal immediate early gene, 1                                                        | 7.7  | 4.7  |
| AB007689 | homer, neuronal immediate early gene, 2                                                        | 10.6 | 3.6  |
| AB007689 | homer, neuronal immediate early gene, 2                                                        | 8    | 10.3 |
| AB007690 | homer, neuronal immediate early gene, 2                                                        | 29.9 | 16.4 |
| AB007768 | dihydroorotase                                                                                 | 10.8 | 8.4  |
| AB008110 | RT1-DOb gene                                                                                   | 7.2  | 8.6  |
| AB008423 | Cytochrome P450, subfamily IID2                                                                | 46.9 | 29.4 |
| AB008424 | Cytochrome P450, subfamily IID3                                                                | 27.1 | 26.4 |
| AB008521 | LIC-2 dynein light intermediate chain 53/55                                                    | 6.8  | 7    |
| AB008522 | LIC-2 dynein light intermediate chain 53/55                                                    | 3    | 1.9  |
| AB008538 | activated leukocyte cell adhesion molecule                                                     | 28.6 | 9.8  |
| AB008682 | fibroblast growth factor 17                                                                    | 10.7 | 9.9  |
| AB008752 | catenin (cadherin-associated protein), delta 2 (neural plakophilin-related arm-repeat protein) | 7.6  | 6.7  |
| AB008807 | glutathione-dependent dehydroascorbate reductase                                               | 67.6 | 58.7 |
| AB008889 | transient receptor protein 4                                                                   | 8.6  | 5.3  |
| AB008908 | fibroblast growth factor 14                                                                    | 8.8  | 10.8 |
| AB009246 | Stem cell growth factor                                                                        | 61.5 | 19.5 |
| AB009372 | lysophospholipase                                                                              | 6.8  | 5    |
| AB009463 | low density lipoprotein receptor-related protein 3                                             | 24.4 | 12.8 |
| AB009463 | low density lipoprotein receptor-related protein 3                                             | 4.8  | 4.4  |
| AB009636 | phosphatidylinositol 3-kinase, C2 domain containing, gamma polypeptide                         | 37.2 | 36.6 |
| AB009662 | testis specific protein 1                                                                      | 3.2  | 0.6  |
| AB009889 | prolactin-like protein H                                                                       | 25.5 | 6.7  |
| AB009890 | spongiorhoblast specific protein                                                               | 69.9 | 37   |
| AB009890 | spongiorhoblast specific protein                                                               | 12.1 | 8.8  |
| AB009999 | CDP-diacylglycerol synthase (phosphatidate cytidylyltransferase) 1                             | 19.2 | 12.3 |
| AB009999 | CDP-diacylglycerol synthase (phosphatidate cytidylyltransferase) 1                             | 15.2 | 14.9 |
| AB010119 | t-complex testis expressed 1                                                                   | 76.1 | 50.8 |
| AB010154 | SH3-binding kinase                                                                             | 9.7  | 8.9  |
| AB010275 | leukemia inhibitory factor                                                                     | 37.2 | 19.1 |
| AB010428 | cytosolic acyl-CoA thioesterase 1                                                              | 8    | 9.3  |
| AB010429 | mitochondrial acyl-CoA thioesterase 1                                                          | 5.2  | 6    |
| AB010436 | cadherin 8                                                                                     | 15.2 | 9.5  |
| AB010437 | cadherin 8                                                                                     | 6.8  | 5.7  |
| AB010466 | liver multidrug resistance-associated protein 6                                                | 33.7 | 24.3 |
| AB010467 | ATP-binding cassette, sub-family C (CFTR/MRP), member 3                                        | 23.1 | 13.4 |
| AB010635 | carboxylesterase 2 (intestine, liver)                                                          | 9.1  | 6.7  |
| AB010920 | membrane cofactor protein                                                                      | 4.7  | 5    |
| AB010960 | Matrix metalloproteinase 23                                                                    | 8.9  | 7.7  |
| AB010963 | potassium large conductance calcium-activated channel, subfamily M, beta member 1              | 8.5  | 6.9  |
| AB010998 | peptidyl arginine deiminase, type 1                                                            | 3.2  | 1.7  |
| AB010999 | peptidyl arginine deiminase, type 4                                                            | 7.7  | 3.1  |
| AB011068 | solute carrier family 25 (mitochondrial carrier, brain), member 14                             | 13.6 | 9.9  |
| AB011068 | solute carrier family 25 (mitochondrial carrier, brain), member 14                             | 8    | 6.2  |
| AB011365 | peroxisome proliferator activated receptor, gamma                                              | 32.9 | 38.4 |
| AB011369 | protein kinase C-binding protein Beta15                                                        | 51.7 | 39.1 |

|          |                                                                              |      |      |
|----------|------------------------------------------------------------------------------|------|------|
| AB011527 | MEGF1                                                                        | 10.4 | 7.7  |
| AB011528 | cadherin EGF LAG seven-pass G-type receptor 3                                | 25.1 | 13.6 |
| AB011528 | cadherin EGF LAG seven-pass G-type receptor 3                                | 9.6  | 8.6  |
| AB011530 | slit homolog 1 (Drosophila)                                                  | 10.8 | 9.5  |
| AB011531 | slit homolog 3 (Drosophila)                                                  | 3.1  | 0.8  |
| AB011532 | MEGF6                                                                        | 20.6 | 16.1 |
| AB011544 | tubby homolog (mouse)                                                        | 16.8 | 9.5  |
| AB011666 | Utrophin                                                                     | 19.2 | 9.4  |
| AB011679 | tubulin, beta 5                                                              | 32.7 | 14.9 |
| AB012210 | putative G protein-coupled receptor (SENR) gene                              | 8.4  | 2    |
| AB012214 | DNA (cytosine-5-)-methyltransferase 1                                        | 13.4 | 9.3  |
| AB012230 | nuclear factor I/B                                                           | 41.1 | 4.9  |
| AB012230 | nuclear factor I/B                                                           | 5.2  | 5    |
| AB012231 | nuclear factor I/B                                                           | 17.9 | 7.7  |
| AB012233 | nuclear factor I/C                                                           | 14.3 | 11.9 |
| AB012234 | nuclear factor I/X                                                           | 19   | 9.1  |
| AB012235 | nuclear factor I/X                                                           | 5.4  | 2.7  |
| AB012600 | aryl hydrocarbon receptor nuclear translocator-like                          | 5.5  | 1.4  |
| AB012759 | prolyl endopeptidase                                                         | 35.6 | 21.4 |
| AB012933 | fatty acid Coenzyme A ligase, long chain 5                                   | 51.9 | 18.5 |
| AB012944 | parathyroid hormone receptor                                                 | 10.4 | 8    |
| AB012960 | nuclear receptor subfamily 5, group A, member 2                              | 9    | 4.8  |
| AB013128 | protein C inhibitor                                                          | 0.8  | 0.3  |
| AB013130 | synaptopodin                                                                 | 38   | 26.5 |
| AB013359 | dolichol-phosphate mannosyltransferase 2                                     | 27.3 | 12.2 |
| AB013359 | dolichol-phosphate mannosyltransferase 2                                     | 1.5  | 1    |
| AB013453 | Rattus norvegicus mRNA for NaPi-2 alpha, complete cds                        | 11.3 | 7.6  |
| AB013455 | solute carrier family 34, member 1                                           | 13.8 | 19.9 |
| AB013455 | solute carrier family 34, member 1                                           | 6.2  | 1.7  |
| AB013890 | potassium inwardly-rectifying channel, subfamily J, member 13                | 2.9  | 1.4  |
| AB014722 | squamous cell carcinoma antigen recognized by T-cells 1                      | 34.3 | 30.4 |
| AB014722 | squamous cell carcinoma antigen recognized by T-cells 1                      | 19.3 | 7.8  |
| AB015042 | drebrin 1                                                                    | 4.3  | 2.9  |
| AB015191 | Rhesus blood group CE and D                                                  | 70.1 | 42.6 |
| AB015194 | Rhesus blood group-associated A glycoprotein                                 | 17.5 | 9.5  |
| AB015308 | guanine nucleotide binding protein, alpha 15                                 | 56.3 | 27   |
| AB015418 | preprolactin-releasing peptide                                               | 10   | 2.3  |
| AB015432 | tumor-associated protein 1                                                   | 51.2 | 16   |
| AB015637 | Alpha1,2-fucosyltransferase a                                                | 53   | 25.9 |
| AB015637 | alpha(1,2) fucosyltransferase                                                | 7.1  | 5    |
| AB015645 | thyrotropin releasing hormone receptor 2                                     | 9.3  | 10   |
| AB015724 | nuclear receptor binding factor 1                                            | 20.2 | 9.9  |
| AB015724 | nuclear receptor binding factor 1                                            | 6.3  | 6.6  |
| AB015946 | tubulin, gamma 1                                                             | 12   | 8.2  |
| AB016160 | gamma-aminobutyric acid (GABA) B receptor, 1                                 | 11.1 | 9.2  |
| AB016160 | gamma-aminobutyric acid (GABA) B receptor, 1                                 | 7    | 5.5  |
| AB016161 | gamma-aminobutyric acid (GABA) B receptor, 1                                 | 69.7 | 33   |
| AB016161 | gamma-aminobutyric acid (GABA) B receptor, 1                                 | 36.8 | 17.5 |
| AB016161 | gamma-aminobutyric acid (GABA) B receptor, 1                                 | 14.6 | 12   |
| AB016161 | gamma-aminobutyric acid (GABA) B receptor, 1                                 | 14.1 | 7.8  |
| AB016425 | occludin                                                                     | 15.5 | 11   |
| AB016532 | period homolog 2                                                             | 2.1  | 1.3  |
| AB016536 | heterogeneous nuclear ribonucleoprotein A/B                                  | 36.8 | 26   |
| AB016800 | 7-dehydrocholesterol reductase                                               | 25   | 14.9 |
| AB016800 | 7-dehydrocholesterol reductase                                               | 15   | 13.8 |
| AB016931 | endothelial differentiation, sphingolipid G-protein-coupled receptor, 5      | 29.6 | 15.3 |
| AB017044 | hepatocyte nuclear factor 3 gamma                                            | 6.3  | 10.9 |
| AB017044 | hepatocyte nuclear factor 3 gamma                                            | 3.1  | 2.9  |
| AB017188 | proteasome (prosome, macropain) 26S subunit, non-ATPase,4                    | 28.2 | 24.8 |
| AB017260 | solute carrier family 22, member 5                                           | 11.6 | 12.8 |
| AB017544 | peroxisomal biogenesis factor 14                                             | 93.9 | 20.3 |
| AB017544 | peroxisomal biogenesis factor 14                                             | 22.3 | 14.4 |
| AB017596 | ectonucleotide pyrophosphatase/phosphodiesterase 1                           | 8.1  | 10.3 |
| AB017656 | cholinergic receptor, muscarinic 3                                           | 18.8 | 12   |
| AB017711 | polymerase II                                                                | 15   | 11.8 |
| AB017820 | Klotho                                                                       | 20.8 | 9.5  |
| AB018081 | Ca+/Calmodulin-dependent protein kinase kinase beta (CaM-kinase kinase beta) | 19.4 | 10.6 |
| AB018104 | oxidised low density lipoprotein (lectin-like) receptor 1                    | 4.5  | 2    |
| AB019145 | regulator of G-protein signaling 9                                           | 4.9  | 3.7  |
| AB019393 | myocilin                                                                     | 12.5 | 7.2  |
| AB019576 | timeless (Drosophila) homolog                                                | 1.6  | 0.5  |
| AB019693 | HP33                                                                         | 5.4  | 6.7  |
| AB020019 | lysosomal trafficking regulator                                              | 2.3  | 1    |
| AB020504 | PMF32 protein                                                                | 43.5 | 17.9 |
| AB020504 | PMF32 protein                                                                | 17   | 10.6 |
| AB020879 | homer, neuronal immediate early gene, 3                                      | 22.4 | 21.5 |
| AB022014 | proteasome (prosome, macropain) 26S subunit, non-ATPase, 10                  | 14   | 8.2  |
| AF000114 | contactin associated protein 1                                               | 28.4 | 34.5 |
| AF000139 | cytochrome P450, subfamily 27b, polypeptide 1                                | 31.3 | 8.4  |

|          |                                                                                           |      |      |
|----------|-------------------------------------------------------------------------------------------|------|------|
| AF000144 | fibroblast growth factor receptor 1                                                       | 18.2 | 10.7 |
| AF000368 | sodium channel, voltage-gated, type 9, alpha polypeptide                                  | 17.3 | 12.2 |
| AF000423 | synaptotagmin 11                                                                          | 8.1  | 9.3  |
| AF000578 | cell division cycle 5-like (S. pombe)                                                     | 30   | 5.4  |
| AF000898 | nucleoporin p58                                                                           | 1.6  | 1    |
| AF000899 | P58/p45 [Rattus norvegicus], mRNA sequence                                                | 32.8 | 18.9 |
| AF000899 | P58/p45 [Rattus norvegicus], mRNA sequence                                                | 3.8  | 2.3  |
| AF000900 | nucleoporin p58                                                                           | 15.3 | 9.4  |
| AF000900 | nucleoporin p58                                                                           | 1.5  | 1.1  |
| AF000901 | nucleoporin p58                                                                           | 9    | 3.1  |
| AF000942 | Inhibitor of DNA binding 3, dominant negative helix-loop-helix protein                    | 40.9 | 20.3 |
| AF000943 | general transcription factor 2a, 1                                                        | 20.7 | 17.8 |
| AF000973 | potassium intermediate/small conductance calcium-activated channel, subfamily N, member 1 | 14.2 | 16.5 |
| AF001417 | core promoter element binding protein                                                     | 32.1 | 21.1 |
| AF001423 | glutamate receptor, ionotropic, N-methyl D-aspartate 2A                                   | 34.8 | 48.1 |
| AF001953 | guanine nucleotide binding protein beta 5                                                 | 12.5 | 2.9  |
| AF001953 | guanine nucleotide binding protein beta 5                                                 | 5.3  | 2.6  |
| AF002251 | protein interacting with guanine nucleotide exchange factor                               | 10.3 | 7.5  |
| AF002281 | actinin alpha 2 associated LIM protein                                                    | 16.5 | 13.8 |
| AF003008 | max interacting protein 1                                                                 | 6.1  | 2.2  |
| AF003523 | bcl-2 associated death agonist                                                            | 7.6  | 5.2  |
| AF003598 | Integrin beta 7                                                                           | 17.6 | 11   |
| AF003825 | glial cell line derived neurotrophic factor family receptor alpha 2                       | 41.7 | 20.2 |
| AF003835 | isopentenyl-diphosphate delta isomerase                                                   | 12.1 | 10.1 |
| AF003904 | CRH-binding protein                                                                       | 3    | 1.6  |
| AF003904 | corticotropin releasing hormone binding protein                                           | 2    | 0.8  |
| AF003998 | blocked early in transport 1 homolog (S. cerevisiae)-like                                 | 3.2  | 1.2  |
| AF004017 | solute carrier family 4, member 4                                                         | 12.6 | 10.9 |
| AF004218 | opioid receptor, sigma 1                                                                  | 28.1 | 9.6  |
| AF004431 | NK homeobox (Drosophila), family 6, A                                                     | 39.3 | 18.4 |
| AF004661 | mannose-binding protein associated serine protease-1                                      | 33.5 | 15.1 |
| AF004811 | moesin                                                                                    | 20.7 | 19.4 |
| AF004840 | immunoglobulin superfamily member                                                         | 23.8 | 16.5 |
| AF004953 | chondroadherin                                                                            | 5.8  | 5.7  |
| AF005099 | neuronal pentraxin receptor                                                               | 9.8  | 11.9 |
| AF005720 | chloride channel 2                                                                        | 9.4  | 12.7 |
| AF006617 | stress 70 protein chaperone, microsome-associated, 60kD human homolog                     | 14.2 | 8.7  |
| AF006619 | nitric oxide synthase 2                                                                   | 7.9  | 4.3  |
| AF006664 | NK2 transcription factor related, locus 5 (Drosophila)                                    | 26.5 | 31.1 |
| AF007554 | Mucin1                                                                                    | 35.7 | 22.4 |
| AF007758 | synuclein, alpha                                                                          | 13.1 | 11   |
| AF007758 | synuclein, alpha                                                                          | 9.2  | 6.1  |
| AF007836 | Rim1 protein                                                                              | 3.8  | 4.4  |
| AF007890 | resection-induced TPI (rs11)                                                              | 19.2 | 5.1  |
| AF008114 | 75 kDa fibrous sheath protein                                                             | 5.8  | 5.8  |
| AF008587 | hemochromatosis                                                                           | 18.4 | 9.4  |
| AF008650 | somatostatin receptor-like protein                                                        | 3.9  | 1.1  |
| AF008912 | neuronal nitric oxide synthase                                                            | 20.8 | 13.4 |
| AF009133 | CD94 antigen (located within the rat natural killer gene complex)                         | 9.1  | 8.8  |
| AF009330 | basic helix-loop-helix domain containing, class B2                                        | 13   | 10.7 |
| AF009511 | NKR-P2, ortholog of human NKG2D                                                           | 12.7 | 9.6  |
| AF009603 | SH3 domain protein 2A                                                                     | 4.9  | 3.2  |
| AF009604 | SH3 domain protein 2 C1                                                                   | 8.7  | 4.5  |
| AF009921 | N-acetylated alpha-linked acidic dipeptidase-like (ileal peptidase I100)                  | 5    | 4.2  |
| AF010293 | olfactory receptor (U131)                                                                 | 6.5  | 5.2  |
| AF010464 | Interleukin 7                                                                             | 0.9  | 0.5  |
| AF010466 | Interferon gamma                                                                          | 12.2 | 10.8 |
| AF010597 | ATP-binding cassette, sub-family B (MDR/TAP), member 11                                   | 39.4 | 18.6 |
| AF012282 | peptide HP (rs14)                                                                         | 15.5 | 11.8 |
| AF012347 | MAD homolog 9 (Drosophila)                                                                | 20.6 | 14.6 |
| AF012714 | multiple inositol polyphosphate histidine phosphatase 1                                   | 33.4 | 6    |
| AF012887 | syncollin                                                                                 | 24.5 | 16   |
| AF012887 | syncollin                                                                                 | 21.2 | 11.7 |
| AF012891 | secreted frizzled-related protein 4                                                       | 10   | 8.5  |
| AF013144 | MAP-kinase phosphatase (cpg21)                                                            | 45.7 | 34.7 |
| AF013145 | PDZ domain containing 1                                                                   | 4.9  | 2    |
| AF013247 | crystallin, beta A4                                                                       | 14.6 | 11.7 |
| AF013248 | Rattus norvegicus beta-A3 crystallin (beta-A3) mRNA, partial cds                          | 14.5 | 6.7  |
| AF013985 | CD40 ligand                                                                               | 4.7  | 3.7  |
| AF014009 | peroxiredoxin 6                                                                           | 19.5 | 15.1 |
| AF014365 | CD44 antigen                                                                              | 1.6  | 0.6  |
| AF014365 | CD44 antigen                                                                              | 0.9  | 0.3  |
| AF014503 | nuclear protein 1                                                                         | 7.8  | 6.6  |
| AF014827 | c-fos induced growth factor (vascular endothelial growth factor D)                        | 20.6 | 8.9  |
| AF015304 | solute carrier family 29, member 1                                                        | 41.9 | 24.7 |
| AF015305 | solute carrier family 29, member 2                                                        | 37.1 | 11.6 |
| AF015719 | Interleukin 15                                                                            | 20   | 19.2 |
| AF015728 | cyclic nucleotide-gated channel beta subunit 1                                            | 23.6 | 11.5 |
| AF015911 | transcriptional repressor NAC1                                                            | 5.5  | 3.9  |



|          |                                                                                       |       |      |
|----------|---------------------------------------------------------------------------------------|-------|------|
| AF015953 | aryl hydrocarbon receptor nuclear translocator-like                                   | 4.9   | 1.7  |
| AF016047 | platelet-activating factor acetylhydrolase, isoform 1b, alpha1 subunit                | 18.9  | 9    |
| AF016178 | putative pheromone receptor (Go-VN1)                                                  | 23.7  | 11.1 |
| AF016179 | putative pheromone receptor (Go-VN2)                                                  | 11.6  | 4.9  |
| AF016180 | putative pheromone receptor (Go-VN3)                                                  | 7.8   | 13.4 |
| AF016181 | putative pheromone receptor (Go-VN4)                                                  | 2.1   | 0.6  |
| AF016182 | putative pheromone receptor (Go-VN5)                                                  | 13.1  | 6    |
| AF016183 | putative pheromone receptor (Go-VN6)                                                  | 1.5   | 1    |
| AF016184 | putative pheromone receptor (Go-VN7)                                                  | 8     | 5.3  |
| AF016185 | putative pheromone receptor Go-VN13C                                                  | 11.7  | 7.4  |
| AF016191 | potassium channel erg3                                                                | 22.2  | 4.9  |
| AF016247 | discoidin domain receptor family, member 2                                            | 4.6   | 3.3  |
| AF016247 | discoidin domain receptor family, member 2                                            | 1     | 0.6  |
| AF016269 | kallikrein 6                                                                          | 10.7  | 5.7  |
| AF016296 | neuropilin                                                                            | 4.7   | 3    |
| AF016297 | neuropilin-2                                                                          | 11.1  | 16.4 |
| AF016387 | retinoid X receptor gamma                                                             | 78.4  | 30.6 |
| AF016387 | retinoid X receptor gamma                                                             | 13.4  | 13.9 |
| AF016503 | procollagen C-proteinase enhancer protein                                             | 20    | 20.9 |
| AF016702 | pituitary glycoprotein hormone alpha-subunit gene                                     | 61.8  | 38.7 |
| AF016900 | latent transforming growth factor beta binding protein 3                              | 25.4  | 21.2 |
| AF016901 | latent transforming growth factor beta binding protein 2                              | 15.9  | 10.1 |
| AF017251 | phospholipase D gene 1                                                                | 1.1   | 0.5  |
| AF017393 | cytochrome P450, subfamily 2F, polypeptide 1                                          | 10.3  | 7    |
| AF017437 | integrin-associated protein                                                           | 9.2   | 7.8  |
| AF017637 | carboxypeptidase Z                                                                    | 41.7  | 24.1 |
| AF017756 | GSK-3beta interacting protein rAxin                                                   | 40    | 21.4 |
| AF017757 | axin 2                                                                                | 2.5   | 1    |
| AF018261 | Epsin 1                                                                               | 13.3  | 8.8  |
| AF019043 | dynamin 1-like                                                                        | 18    | 13.7 |
| AF019624 | growth differentiation factor 8                                                       | 11.3  | 9.8  |
| AF019628 | ATP-binding cassette, sub-family C (CFTR/MRP), member 9                               | 26    | 18.2 |
| AF019974 | chromogranin B                                                                        | 6.8   | 8.5  |
| AF020045 | integrin alpha E1, epithelial-associated                                              | 3.3   | 1    |
| AF020046 | integrin alpha E1, epithelial-associated                                              | 5.4   | 6.9  |
| AF020046 | integrin alpha E1, epithelial-associated                                              | 5.3   | 0.6  |
| AF020210 | dynamin 1-like                                                                        | 25.9  | 13.2 |
| AF020212 | dynamin 1-like                                                                        | 23.1  | 12   |
| AF020618 | myeloid differentiation primary response gene 116                                     | 61    | 22.9 |
| AF020618 | myeloid differentiation primary response gene 116                                     | 39.3  | 15.8 |
| AF020712 | potassium large conductance calcium-activated channel, subfamily M, beta member 1     | 81    | 39.6 |
| AF020757 | purinergic receptor P2X, ligand-gated ion channel, 2                                  | 7.4   | 6.7  |
| AF020758 | purinergic receptor P2X, ligand-gated ion channel, 2                                  | 68.2  | 16.3 |
| AF020758 | purinergic receptor P2X, ligand-gated ion channel, 2                                  | 14.4  | 9    |
| AF021137 | potassium inwardly-rectifying channel, subfamily J, member 2                          | 5.6   | 7    |
| AF021349 | killer cell lectin-like receptor subfamily C, member 2                                | 8.7   | 5.6  |
| AF021350 | killer cell lectin-like receptor subfamily C, member 1                                | 20.9  | 13.5 |
| AF021923 | solute carrier family 24 (sodium/potassium/calcium exchanger), member 2               | 8.6   | 7.2  |
| AF021935 | Ser-Thr protein kinase related to the myotonic dystrophy protein kinase               | 36.6  | 22.7 |
| AF021936 | Cdc42-binding protein kinase beta                                                     | 19.2  | 19.4 |
| AF022081 | ring finger protein 4                                                                 | 9.9   | 13.1 |
| AF022085 | Rattus norvegicus guanine nucleotide binding protein beta 4 subunit mRNA, partial cds | 17.1  | 9.5  |
| AF022136 | gap junction membrane channel protein alpha 5                                         | 47.9  | 25.6 |
| AF022147 | integral membrane-associated protein 1                                                | 6.7   | 2.6  |
| AF022147 | integral membrane-associated protein 1                                                | 5.5   | 3.8  |
| AF022247 | cubilin                                                                               | 12.7  | 9.7  |
| AF022729 | HNK-1 sulfotransferase                                                                | 13.2  | 15.9 |
| AF022742 | thrombomodulin                                                                        | 112.7 | 38.5 |
| AF022774 | rabphilin 3A-like (without C2 domains)                                                | 40.6  | 14.7 |
| AF022774 | rabphilin 3A-like (without C2 domains)                                                | 24.6  | 13   |
| AF022819 | putative potassium channel TWIK                                                       | 13.3  | 15.9 |
| AF022952 | vascular endothelial growth factor B                                                  | 10.8  | 8.3  |
| AF023302 | flotillin 2                                                                           | 140.1 | 92.6 |
| AF023621 | sortilin 1                                                                            | 7.3   | 6.4  |
| AF023657 | endo-alpha-mannosidase                                                                | 14.5  | 12.7 |
| AF024712 | MHC class Ib M4 (RT1.M4)                                                              | 8.2   | 8.7  |
| AF025424 | RNA polymerase I (127 kDa subunit)                                                    | 5.2   | 2.3  |
| AF025425 | RNA polymerase I (194 kDa subunit)                                                    | 7.1   | 3.6  |
| AF025506 | rab acceptor 1 (prenylated)                                                           | 37.6  | 27.2 |
| AF025670 | caspase 6                                                                             | 18.8  | 22.6 |
| AF025670 | caspase 6                                                                             | 2.4   | 0.8  |
| AF025671 | caspase 2                                                                             | 52.6  | 34.3 |
| AF025819 | retinoblastoma-binding protein 9                                                      | 6.1   | 5.2  |
| AF026476 | upstream transcription factor 1                                                       | 1.8   | 1.1  |
| AF026504 | SPA-1 like protein p1294                                                              | 24.7  | 17.7 |
| AF026505 | Arg/Abl-interacting protein ArgBP2                                                    | 44.9  | 27   |
| AF026529 | stathmin-like 4                                                                       | 17.8  | 8.6  |
| AF026554 | solute carrier family 5, member 6                                                     | 24.1  | 13.4 |
| AF027188 | Rattus norvegicus SA mRNA, partial 3'UTR                                              | 5.1   | 3.1  |

|          |                                                                                                                                     |       |      |
|----------|-------------------------------------------------------------------------------------------------------------------------------------|-------|------|
| AF027331 | glutamate receptor, ionotropic, kainate 3                                                                                           | 7.8   | 2.2  |
| AF027506 | solute carrier family 24 (sodium/potassium/calcium exchanger), member 2                                                             | 27.4  | 17.4 |
| AF027571 | Phospholipase C , beta4                                                                                                             | 16.5  | 17.1 |
| AF027954 | Bcl-2-related ovarian killer protein                                                                                                | 20    | 14.5 |
| AF027984 | calcium channel, voltage-dependent, T type, alpha 1G subunit                                                                        | 38.5  | 13   |
| AF028603 | purinergic receptor P2X, ligand-gated ion channel, 2                                                                                | 6.6   | 6.4  |
| AF028784 | glial fibrillary acidic protein alpha (GFAP)                                                                                        | 22.1  | 10.8 |
| AF028784 | glial fibrillary acidic protein alpha (GFAP)                                                                                        | 22.1  | 14.2 |
| AF028784 | glial fibrillary acidic protein alpha (GFAP)                                                                                        | 5.8   | 1.6  |
| AF029105 | amyloid beta (A4) precursor protein-binding, family A, APBA1: amyloid beta (A4) precursor protein-binding, family A, member 1 (X11) | 6.8   | 4.9  |
| AF029107 | amyloid beta (A4) precursor protein-binding, family A, member 2 (X11-like)                                                          | 10.7  | 5.1  |
| AF029109 | amyloid beta (A4) precursor protein-binding, family A, member 3 (X11-like 2)                                                        | 11.5  | 11.9 |
| AF029310 | transient receptor potential cation channel, subfamily V, member 1                                                                  | 8.8   | 4.8  |
| AF029690 | 8-oxoguanine-DNA-glycosylase                                                                                                        | 3.5   | 2.2  |
| AF030050 | replication factor C                                                                                                                | 5.3   | 5.2  |
| AF030086 | Rattus norvegicus activity and neurotransmitter-induced early gene 1 (ania-1) mRNA, 3'UTR                                           | 0.9   | 0.5  |
| AF030087 | Rattus norvegicus activity and neurotransmitter-induced early gene 2 (ania-2) mRNA, 3'UTR                                           | 17    | 11.5 |
| AF030087 | Rattus norvegicus activity and neurotransmitter-induced early gene 2 (ania-2) mRNA, 3'UTR                                           | 5.2   | 2.5  |
| AF030088 | homer, neuronal immediate early gene, 1                                                                                             | 5.3   | 3    |
| AF030089 | activity and neurotransmitter-induced early gene protein 4 (ania-4)                                                                 | 6.1   | 6.4  |
| AF030091 | cyclin L                                                                                                                            | 13    | 14.4 |
| AF030091 | cyclin L                                                                                                                            | 8     | 5.7  |
| AF030163 | Uncoupling protein 3, mitochondrial                                                                                                 | 3.8   | 3.9  |
| AF030253 | vesicular inhibitory amino acid transporter                                                                                         | 18.8  | 24.3 |
| AF030358 | chemokine (C-X3-C motif) ligand 1                                                                                                   | 66.3  | 10.3 |
| AF030378 | angiopoietin-2                                                                                                                      | 9.4   | 10.1 |
| AF030558 | phosphatidylinositol-4-phosphate 5-kinase, type II, gamma                                                                           | 20.6  | 14.9 |
| AF031234 | ileal sodium-dependent bile acid transporter (ISBAT)                                                                                | 7.7   | 5.8  |
| AF031384 | potassium channel, subfamily K, member 3                                                                                            | 8.9   | 2.3  |
| AF031522 | galanin receptor 3                                                                                                                  | 5.4   | 3.1  |
| AF031528 | opsin 1 (cone pigments), medium-wave-sensitive (color blindness, deutan), green opsin                                               | 31.5  | 17.3 |
| AF031657 | zinc-finger protein 94                                                                                                              | 25.7  | 7.9  |
| AF031878 | peripherin 1                                                                                                                        | 5     | 1.5  |
| AF031880 | neurofilament, light polypeptide                                                                                                    | 9.6   | 2.9  |
| AF031943 | cyclic nucleotide gated channel alpha 3                                                                                             | 15.2  | 8.6  |
| AF032666 | Rsec5 protein                                                                                                                       | 20    | 14.8 |
| AF032666 | Rsec5 protein                                                                                                                       | 16.8  | 11.4 |
| AF032667 | rexo70                                                                                                                              | 17.3  | 11.7 |
| AF032668 | SEC15 homolog (S. cerevisiae)                                                                                                       | 57.4  | 19.4 |
| AF032669 | exocyst complex 84-kDa subunit                                                                                                      | 2.8   | 1    |
| AF032872 | potassium channel regulatory protein KChAP                                                                                          | 28.2  | 14.4 |
| AF033027 | prenylated SNARE protein                                                                                                            | 5.2   | 2.2  |
| AF033109 | syntaxin 8                                                                                                                          | 16.6  | 12.8 |
| AF033355 | phosphatidylinositol-4-phosphate 5-kinase, type II, beta                                                                            | 2.4   | 0.8  |
| AF034214 | methionine synthase                                                                                                                 | 9.9   | 6.9  |
| AF034218 | hyaluronidase 2                                                                                                                     | 80.4  | 18.1 |
| AF034577 | pyruvate dehydrogenate kinase 4                                                                                                     | 9     | 11.6 |
| AF034582 | vesicle associated protein                                                                                                          | 11.8  | 12.3 |
| AF034716 | CCAAT/enhancer binding protein , epsilon                                                                                            | 7.2   | 0.9  |
| AF034753 | DC16                                                                                                                                | 7.7   | 5.6  |
| AF034863 | activin receptor interacting protein 1                                                                                              | 1.6   | 0.4  |
| AF034896 | olfactory receptor-like protein (SCR D-8)                                                                                           | 22.6  | 17   |
| AF034897 | olfactory receptor-like protein (SCR D-8)                                                                                           | 36.6  | 15.1 |
| AF034898 | olfactory receptor-like protein (SCR D-8)                                                                                           | 7.1   | 2.4  |
| AF034899 | olfactory receptor-like protein (SCR D-9)                                                                                           | 129.6 | 66.6 |
| AF034899 | olfactory receptor-like protein (SCR D-9)                                                                                           | 22.1  | 5.9  |
| AF034899 | olfactory receptor-like protein (SCR D-9)                                                                                           | 5     | 2.2  |
| AF034900 | olfactory receptor-like protein (SCR D-7)                                                                                           | 15.5  | 21.1 |
| AF034901 | olfactory receptor-like protein (SCR G-14)                                                                                          | 5.3   | 1.9  |
| AF035151 | regulator of G-protein signaling 12                                                                                                 | 6.1   | 1.4  |
| AF035156 | hydroxysteroid 17-beta dehydrogenase 3                                                                                              | 32.5  | 11.7 |
| AF035632 | syntaxin 12                                                                                                                         | 9.6   | 11.1 |
| AF035673 | retinal pigment epithelium, 65 kDa                                                                                                  | 5     | 8.5  |
| AF035822 | synaptosomal-associated protein, 29kD                                                                                               | 14.5  | 10   |
| AF035943 | Uncoupling protein 3, mitochondrial                                                                                                 | 7     | 1.7  |
| AF035951 | Rattus norvegicus kinesin-related protein KRP1 (KRP1) mRNA, partial cds                                                             | 9.8   | 10.8 |
| AF035952 | kinesin-related protein 3                                                                                                           | 3.8   | 1.7  |
| AF035953 | kinesin-related protein KRP4                                                                                                        | 4.2   | 7.3  |
| AF035954 | kinesin-related protein KRP5                                                                                                        | 3.6   | 2    |
| AF035955 | kinesin-like 1                                                                                                                      | 12.1  | 3.2  |
| AF035963 | kidney injury molecule 1                                                                                                            | 3.5   | 3.9  |
| AF036255 | tripartite motif protein 3                                                                                                          | 10.4  | 9.4  |
| AF036335 | NonO/p54nrb homolog                                                                                                                 | 24.8  | 19   |
| AF036335 | NonO/p54nrb homolog                                                                                                                 | 11.9  | 11.3 |
| AF036537 | homocysteine respondent protein HCYP2                                                                                               | 40.3  | 14.6 |
| AF036548 | Rgc32 protein                                                                                                                       | 3     | 1.2  |
| AF036548 | Rgc32 protein                                                                                                                       | 1.6   | 1.3  |
| AF036760 | breast cancer 1                                                                                                                     | 1.1   | 0.3  |

|          |                                                                                              |       |      |
|----------|----------------------------------------------------------------------------------------------|-------|------|
| AF036761 | stearoyl-Coenzyme A desaturase 2                                                             | 8.1   | 6.6  |
| AF036761 | stearoyl-Coenzyme A desaturase 2                                                             | 6.9   | 5    |
| AF036959 | homeodomain-interacting protein kinase 3                                                     | 5.6   | 2.3  |
| AF037067 | tumor necrosis factor (ligand) superfamily, member 4                                         | 10.8  | 13.1 |
| AF037071 | C-terminal PDZ domain ligand of neuronal nitric oxide synthase                               | 6.3   | 2.5  |
| AF037072 | carbonic anhydrase 3                                                                         | 39.6  | 9    |
| AF037199 | zinc finger transcription factor REST protein                                                | 6     | 3    |
| AF037272 | wap four-disulfide core domain 1                                                             | 11.2  | 9.6  |
| AF038043 | trehalase                                                                                    | 8.3   | 5.3  |
| AF038388 | actin-filament binding protein frabin                                                        | 18.2  | 6.7  |
| AF038571 | solute carrier family 1, member 1                                                            | 25    | 10.1 |
| AF038870 | betaine-homocysteine methyltransferase                                                       | 8.6   | 7.4  |
| AF039203 | corticotropin releasing hormone receptor 1                                                   | 26.9  | 17.8 |
| AF039218 | citron                                                                                       | 59.8  | 16.7 |
| AF039308 | glutaminy cyclase                                                                            | 24.5  | 8.1  |
| AF039583 | decay-accelarating factor                                                                    | 1.7   | 0.6  |
| AF039584 | decay-accelarating factor                                                                    | 17.4  | 9.8  |
| AF039832 | paired-like homeodomain transcription factor 2                                               | 20.8  | 15.3 |
| AF039832 | paired-like homeodomain transcription factor 2                                               | 7.5   | 7.2  |
| AF039890 | alanyl (membrane) aminopeptidase                                                             | 46    | 59.1 |
| AF039891 | alanyl (membrane) aminopeptidase                                                             | 80.5  | 14.7 |
| AF040261 | phosphatidylcholine transfer protein                                                         | 18.5  | 10.6 |
| AF040750 | G protein-coupled receptor kinase 6                                                          | 150.5 | 45.5 |
| AF040954 | putative protein phosphatase 1 nuclear targeting subunit                                     | 34.2  | 11.4 |
| AF040961 | Persephin                                                                                    | 14.2  | 7.8  |
| AF041066 | ribonuclease, RNase A family 4                                                               | 16.9  | 13.2 |
| AF041082 | roundabout homolog 1 (Drosophila)                                                            | 5.5   | 8.1  |
| AF041083 | Solute carrier family 11 member 1                                                            | 45.8  | 30.2 |
| AF041105 | solute carrier family 21 (fatty acid transporter), member 7                                  | 5.8   | 4.2  |
| AF041107 | tuberin-like protein 1                                                                       | 12.6  | 8    |
| AF041107 | tuberin-like protein 1                                                                       | 11    | 7.4  |
| AF041244 | hypocretin receptor 1                                                                        | 30.9  | 6.8  |
| AF041246 | Hypocretin (orexin) receptor 2                                                               | 4     | 1.7  |
| AF041373 | phosphatidylinositol binding clathrin assembly protein                                       | 118.8 | 39.9 |
| AF041838 | receptor tyrosine kinase                                                                     | 14.6  | 8.4  |
| AF041838 | receptor tyrosine kinase                                                                     | 8.2   | 2.8  |
| AF041854 | CaM-KII inhibitory protein                                                                   | 35.3  | 8.3  |
| AF042499 | MAD homolog 7 (Drosophila)                                                                   | 5.5   | 3.7  |
| AF042713 | neurexophilin 3                                                                              | 3     | 1.2  |
| AF042714 | neurexophilin 4                                                                              | 38.5  | 32.2 |
| AF043642 | matrin cyclophilin (matrin-cyp)                                                              | 9     | 6.5  |
| AF044201 | lifeguard                                                                                    | 24    | 15.2 |
| AF044574 | 2-4-dienoyl-Coenzyme A reductase 2, peroxisomal                                              | 5.1   | 2.2  |
| AF044581 | syntaxin 12                                                                                  | 30    | 16.7 |
| AF044910 | survival motor neuron                                                                        | 15.6  | 9.3  |
| AF044910 | survival motor neuron                                                                        | 8.9   | 6.5  |
| AF045564 | development-related protein                                                                  | 11.7  | 3.5  |
| AF047384 | postsynaptic protein Cript                                                                   | 8.4   | 5.7  |
| AF047707 | UDP-glucose:ceramide glycosyltransferase                                                     | 10.8  | 8.4  |
| AF048828 | voltage-dependent anion channel 1                                                            | 20.6  | 15.9 |
| AF048828 | voltage-dependent anion channel 1                                                            | 8.5   | 7.8  |
| AF049239 | sodium channel, voltage-gated, type 8, alpha polypeptide                                     | 4     | 2.5  |
| AF049344 | UDP-GalNAc:polypeptide N-acetylgalactosaminyltransferase T5                                  | 17.4  | 12.8 |
| AF050159 | insulin receptor substrate 2                                                                 | 12.7  | 4.5  |
| AF050214 | type I pro-alpha-2 collagen-like                                                             | 14.2  | 14.4 |
| AF050660 | Rattus norvegicus activity and neurotransmitter-induced early gene 8 (ania-8) mRNA, 3' UTR   | 22.4  | 17.3 |
| AF050661 | Rattus norvegicus activity and neurotransmitter-induced early gene 9 (ania-9) mRNA, 3' UTR   | 8.3   | 6.3  |
| AF050662 | Rattus norvegicus activity and neurotransmitter-induced early gene 10 (ania-10) mRNA, 3' UTR | 6.4   | 5.1  |
| AF050663 | Rattus norvegicus activity and neurotransmitter-induced early gene 11 (ania-11) mRNA, 3' UTR | 32.6  | 17.4 |
| AF050664 | Rattus norvegicus activity and neurotransmitter-induced early gene 12 (ania-12) mRNA, 3' UTR | 7     | 4.2  |
| AF051155 | G protein beta subunit-like                                                                  | 59    | 19.2 |
| AF051155 | G protein beta subunit-like                                                                  | 2.4   | 1.1  |
| AF051425 | chondromodulin-1                                                                             | 15.9  | 8.4  |
| AF051526 | calcium channel, voltage-dependent, alpha 1A subunit                                         | 11.8  | 14.5 |
| AF051527 | calcium channel, voltage-dependent, alpha 1A subunit                                         | 9.5   | 3.6  |
| AF051561 | solute carrier family 12, member 2                                                           | 20.3  | 9    |
| AF051943 | expressed in non-metastatic cells 6                                                          | 20.1  | 11.8 |
| AF051943 | expressed in non-metastatic cells 6                                                          | 9.9   | 4    |
| AF052540 | calpain 3                                                                                    | 11.5  | 6.3  |
| AF052695 | cell cycle protein p53CDC                                                                    | 5.8   | 6.9  |
| AF053094 | Rattus norvegicus pachytene spermatocytes methoxy acetic acid induced gene, partial sequence | 15    | 10.6 |
| AF053095 | oxidative stress induced                                                                     | 15.7  | 10.7 |
| AF053097 | phosphodiesterase                                                                            | 6.5   | 5.9  |
| AF053100 | paired box gene 4                                                                            | 28.9  | 29.7 |
| AF053100 | paired box gene 4                                                                            | 8.8   | 6.6  |
| AF053101 | paired box gene 4                                                                            | 2.5   | 1.7  |
| AF053362 | death effector domain-containing protein                                                     | 3.9   | 5    |
| AF053362 | death effector domain-containing protein                                                     | 2.9   | 2.4  |
| AF053768 | brain specific cortactin-binding protein CBP90                                               | 10.5  | 8.3  |

|          |                                                                                       |       |      |
|----------|---------------------------------------------------------------------------------------|-------|------|
| AF053938 | synaptic Ras GTPase activating protein 1                                              | 4.3   | 2.3  |
| AF053987 | omeronasal neurons putative pheromone receptor V2R1                                   | 12.5  | 7    |
| AF053987 | tissue-type vomeronasal neurons putative pheromone receptor V2R1                      | 6.4   | 6.3  |
| AF053988 | vomeronasal neurons putative pheromone receptor V2R1-1                                | 15.2  | 6.9  |
| AF053990 | vomeronasal neurons putative pheromone receptor V2R2B                                 | 3.8   | 1.1  |
| AF053991 | vomeronasal neurons putative pheromone receptor V2R3                                  | 15.4  | 9.4  |
| AF053992 | vomeronasal neurons putative pheromone receptor V2R4                                  | 2.4   | 0.6  |
| AF054241 | opsin 1 (cone pigments), medium-wave-sensitive (color blindness, deutan), green opsin | 7.4   | 6.3  |
| AF054270 | prolactin induced protein                                                             | 10.5  | 6.3  |
| AF054270 | prolactin induced protein                                                             | 1.9   | 1.5  |
| AF054586 | zinc finger protein 179                                                               | 9.8   | 2.5  |
| AF054618 | cortactin isoform B                                                                   | 9.6   | 12.6 |
| AF054826 | vesicle-associated membrane protein 5                                                 | 26.8  | 8.2  |
| AF055286 | solute carrier family 22, member 3                                                    | 15.8  | 24.5 |
| AF055286 | solute carrier family 22, member 3                                                    | 2.6   | 3.1  |
| AF055291 | signal transducer and activator of transcription 4 (stat4)                            | 3.5   | 4.1  |
| AF055477 | calcium channel, voltage-dependent, N type, alpha 1B subunit                          | 10.6  | 6.4  |
| AF055667 | MHC class Ib antigen RT1.M5                                                           | 37.2  | 19.2 |
| AF055714 | hypertension-regulated vascular factor-1C-4                                           | 4.5   | 3.9  |
| AF055884 | DEAF-1 related transcriptional regulator (NUDR)                                       | 6.6   | 6.2  |
| AF056031 | kynurenine 3-hydroxylase                                                              | 8.4   | 5.3  |
| AF056034 | nexilin                                                                               | 16.7  | 8.8  |
| AF056208 | PAM COOH-terminal interactor protein 1                                                | 16    | 9.7  |
| AF056324 | scaffold attachment factor B                                                          | 33.5  | 26   |
| AF056324 | scaffold attachment factor B                                                          | 3.6   | 0.7  |
| AF056333 | cytochrome P450, subfamily 2E, polypeptide 1                                          | 7.6   | 5.4  |
| AF056704 | synapsin 3                                                                            | 5.1   | 2.6  |
| AF057025 | toll-like receptor 4                                                                  | 17.3  | 14.5 |
| AF057564 | putative retrovirus-related gag protein                                               | 4.3   | 2.5  |
| AF058714 | solute carrier family 13, member 2                                                    | 23.8  | 16.4 |
| AF058789 | synaptic Ras GTPase activating protein 1                                              | 14.6  | 9.4  |
| AF058791 | maternal G10 transcript                                                               | 47.2  | 15.7 |
| AF058795 | G protein-coupled receptor 51                                                         | 18.8  | 16.3 |
| AF059030 | sodium channel, voltage-gated, type11, alpha polypeptide                              | 12.9  | 12.5 |
| AF059258 | solute carrier family 16, member 8                                                    | 9.6   | 4    |
| AF059273 | glucocorticoid modulatory element binding protein 2                                   | 10.6  | 9    |
| AF059530 | protein arginine N-methyltransferase 3(hnRNP methyltransferase S. cerevisiae)-like 3  | 23.5  | 13.2 |
| AF059678 | replication factor C                                                                  | 9.4   | 8.6  |
| AF060116 | proline rich synapse associated protein 1                                             | 5.5   | 5.7  |
| AF060173 | SV2 related protein                                                                   | 4.4   | 2.1  |
| AF060174 | synaptic vesicle protein 2C                                                           | 15.9  | 9.5  |
| AF060819 | RAS guanyl releasing protein 1                                                        | 1.4   | 0.5  |
| AF060879 | chondroitin sulfate proteoglycan 3                                                    | 9.4   | 4.5  |
| AF061242 | fractured callus expressed transcript 1                                               | 11.9  | 10.5 |
| AF061266 | transient receptor protein 1                                                          | 134.8 | 84.6 |
| AF061266 | transient receptor protein 1                                                          | 1.7   | 1.1  |
| AF061443 | G protein-coupled receptor 48                                                         | 5.3   | 3.5  |
| AF061726 | calpain 3                                                                             | 9.6   | 2    |
| AF061752 | transcription factor 21                                                               | 7.5   | 5    |
| AF061945 | glutamate receptor, ionotropic, N-methyl-D-aspartate 3A                               | 32.4  | 24.9 |
| AF061945 | glutamate receptor, ionotropic, N-methyl-D-aspartate 3A                               | 22.5  | 6.2  |
| AF061947 | cain                                                                                  | 119.1 | 68.9 |
| AF061947 | cain                                                                                  | 7.2   | 2.5  |
| AF061957 | ether-a-go-go-like potassium channel 1                                                | 15    | 11.4 |
| AF061971 | palmitoyl-protein thioesterase 2                                                      | 46.8  | 38.1 |
| AF062389 | kidney-specific protein (KS)                                                          | 2.2   | 0.8  |
| AF062594 | nucleosome assembly protein 1-like 1                                                  | 23.4  | 19.6 |
| AF062594 | nucleosome assembly protein 1-like 1                                                  | 4.2   | 1.8  |
| AF062740 | pyruvate dehydrogenase phosphatase isoenzyme 1                                        | 12.4  | 9.8  |
| AF062740 | pyruvate dehydrogenase phosphatase isoenzyme 1                                        | 3.4   | 1.6  |
| AF062741 | pyruvate dehydrogenase phosphatase isoenzyme 2                                        | 3.6   | 2    |
| AF062741 | pyruvate dehydrogenase phosphatase isoenzyme 2                                        | 1.5   | 0.2  |
| AF063102 | calcium-independent alpha-latrotoxin receptor homolog 2                               | 23.9  | 15.8 |
| AF063102 | calcium-independent alpha-latrotoxin receptor homolog 2                               | 6.5   | 3.6  |
| AF063103 | calcium-independent alpha-latrotoxin receptor homolog 3                               | 10.7  | 7.1  |
| AF063103 | calcium-independent alpha-latrotoxin receptor homolog 3                               | 1.9   | 0.9  |
| AF063249 | protein tyrosine phosphatase, receptor type, Q                                        | 14    | 7    |
| AF063302 | carnitine palmitoyltransferase 1b                                                     | 100.7 | 46.3 |
| AF063302 | carnitine palmitoyltransferase 1b                                                     | 71    | 11.7 |
| AF063447 | nuclear RNA helicase, DECD variant of DEAD box family                                 | 18.5  | 12.7 |
| AF063851 | mast cell protease 1                                                                  | 13.7  | 15   |
| AF063890 | protein tyrosine kinase 2 beta                                                        | 23.1  | 11.6 |
| AF064706 | G protein-coupled receptor 6                                                          | 1.4   | 0.4  |
| AF064856 | sp. 7acomp protein                                                                    | 10.9  | 2.7  |
| AF064868 | brain-enriched guanylate kinase-associated                                            | 23.4  | 16.4 |
| AF064868 | brain-enriched guanylate kinase-associated                                            | 13.2  | 7    |
| AF064869 | brain-enriched guanylate kinase-associated                                            | 13.6  | 2    |
| AF065149 | ankyrin 3 (G)                                                                         | 4.2   | 2    |
| AF065150 | ankyrin 3 (G)                                                                         | 5.6   | 6.1  |

|          |                                                                                    |       |      |
|----------|------------------------------------------------------------------------------------|-------|------|
| AF065161 | cytokine inducible SH2-containing protein                                          | 6.3   | 2.2  |
| AF065387 | gamma-glutamyl carboxylase                                                         | 15.8  | 13.6 |
| AF065387 | gamma-glutamyl carboxylase                                                         | 8.7   | 5.7  |
| AF065431 | BCL2-like 11 (apoptosis facilitator)                                               | 10.5  | 5.4  |
| AF065432 | BCL2-like 11 (apoptosis facilitator)                                               | 18    | 6.8  |
| AF065433 | BCL2-like 11 (apoptosis facilitator)                                               | 6.2   | 6.7  |
| AF067650 | sarcosine dehydrogenase                                                            | 5.3   | 1.2  |
| AF067727 | MAD homolog 1 (Drosophila)                                                         | 6     | 5.7  |
| AF067790 | palmitoyl-protein thioesterase 2                                                   | 37    | 15.1 |
| AF067795 | C-terminal binding protein 1                                                       | 58.2  | 30.1 |
| AF068261 | serine threonine kinase 39 (STE20/SPS1 homolog, yeast)                             | 4.7   | 4.5  |
| AF068268 | 2'5' oligoadenylate synthetase-2                                                   | 8.5   | 9.4  |
| AF068861 | beta defensin-2                                                                    | 4.5   | 1.9  |
| AF069525 | ankyrin 3 (G)                                                                      | 17.2  | 8.7  |
| AF069775 | cell adhesion molecule with homology to L1CAM (close homologue of L1)              | 17.1  | 16.2 |
| AF069782 | Nopp140 associated protein                                                         | 9.4   | 7.3  |
| AF070065 | Rattus norvegicus Citron-K kinase mRNA, partial cds                                | 16.4  | 14.9 |
| AF071014 | alpha-1D adrenergic receptor                                                       | 34.5  | 15.9 |
| AF071204 | stem cell factor KL-1 precursor                                                    | 7.3   | 8.2  |
| AF071204 | stem cell factor KL-1 precursor                                                    | 6.8   | 5.2  |
| AF071495 | scavenger receptor class B, member 1                                               | 133.7 | 28.3 |
| AF072124 | caspase-7                                                                          | 6.7   | 2.7  |
| AF072411 | cd36 antigen                                                                       | 15.9  | 6.4  |
| AF072411 | cd36 antigen                                                                       | 8.8   | 6.5  |
| AF072439 | zinc finger protein 37                                                             | 17.3  | 10.2 |
| AF072865 | thioredoxin reductase 2                                                            | 20.8  | 14.7 |
| AF072865 | thioredoxin reductase 2                                                            | 20.3  | 10.4 |
| AF072892 | chondroitin sulfate proteoglycan 2 (versican)                                      | 3.2   | 1    |
| AF072935 | small GTP-binding protein rab5                                                     | 16.3  | 6    |
| AF073891 | potassium voltage-gated channel, subfamily H (eag-related), member 5               | 10.8  | 8.3  |
| AF073892 | potassium voltage-gated channel, subfamily H (eag-related), member 3               | 22.4  | 21.5 |
| AF074482 | G protein-coupled receptor 51                                                      | 7.7   | 7.7  |
| AF075250 | myosin heavy polypeptide 13                                                        | 26.3  | 22.7 |
| AF075382 | cytokine inducible SH2-containing protein 2                                        | 2.3   | 1.7  |
| AF075383 | cytokine inducible SH2-containing protein 3                                        | 49.9  | 29   |
| AF076183 | cytosolic sorting protein PACS-1                                                   | 39.9  | 14.7 |
| AF076183 | cytosolic sorting protein PACS-1                                                   | 26.8  | 15.9 |
| AF076184 | cytosolic sorting protein PACS-1                                                   | 38    | 25   |
| AF076619 | growth factor receptor bound protein 14                                            | 18.7  | 13.4 |
| AF076856 | espin                                                                              | 49.8  | 26   |
| AF077000 | protein tyrosine phosphatase TD14                                                  | 28.3  | 22   |
| AF077000 | protein tyrosine phosphatase TD14                                                  | 13.2  | 3.3  |
| AF077195 | Sertoli cell protein 1                                                             | 1.7   | 0.7  |
| AF077338 | norvegicus myosin binding protein H                                                | 36    | 21.8 |
| AF077338 | norvegicus myosin binding protein H                                                | 9     | 7.7  |
| AF077354 | heat shock 70 kDa protein 4                                                        | 9.2   | 10.2 |
| AF078778 | microtubule-associated protein 1B                                                  | 4     | 0.8  |
| AF078779 | voltage gated channel like 1                                                       | 19.4  | 18.1 |
| AF078779 | voltage gated channel like 1                                                       | 4.6   | 2.5  |
| AF079162 | patched (Drosophila) homolog                                                       | 40.9  | 19.4 |
| AF079864 | olfactory receptor 78                                                              | 25.7  | 16.6 |
| AF079873 | zinc finger protein 162                                                            | 19.9  | 9    |
| AF080468 | glucose-6-phosphatase, transport protein 1                                         | 25    | 13.8 |
| AF080468 | glucose-6-phosphatase, transport protein 1                                         | 18.3  | 10.5 |
| AF080507 | mannose-binding protein                                                            | 12.9  | 8.5  |
| AF080507 | mannose-binding protein                                                            | 3.9   | 2    |
| AF080568 | phosphate cytidylyltransferase 2, ethanolamine                                     | 10.8  | 8.4  |
| AF080568 | phosphate cytidylyltransferase 2, ethanolamine                                     | 8.4   | 4.2  |
| AF081144 | CL1BA protein                                                                      | 22.4  | 19.2 |
| AF081196 | RAS guanyl releasing protein 1                                                     | 4.6   | 1.7  |
| AF081204 | solute carrier family 5, member 6                                                  | 19.5  | 17.4 |
| AF081365 | Potassium inwardly-rectifying channel, subfamily J, member 1                       | 25.9  | 16.2 |
| AF081366 | Potassium inwardly-rectifying channel, subfamily J, member 1                       | 13.8  | 14.9 |
| AF081557 | glial cells missing (Drosophila) homolog a                                         | 36.1  | 9.4  |
| AF081941 | soluble adenylyl cyclase                                                           | 5     | 3.4  |
| AF082124 | Aryl hydrocarbon receptor                                                          | 9.5   | 4.8  |
| AF082125 | Aryl hydrocarbon receptor                                                          | 5.9   | 1.9  |
| AF082160 | galectin-related inter-fiber protein                                               | 35.7  | 16.2 |
| AF082533 | lymphocyte antigen 94 (mouse) homolog (activating NK-receptor; NK-p46)             | 9.9   | 7.1  |
| AF082834 | 4-hydroxyphenylpyruvic acid dioxygenase                                            | 5.8   | 3.6  |
| AF083330 | kinesin family member 3C                                                           | 2.9   | 1.9  |
| AF083331 | kinesin family member 1B                                                           | 2.9   | 3.9  |
| AF083341 | potassium large conductance calcium-activated channel, subfamily M, alpha member 1 | 9     | 5.6  |
| AF083418 | insulin receptor substrate-2                                                       | 3.6   | 1.5  |
| AF084186 | alpha-spectrin 2                                                                   | 9.1   | 6.9  |
| AF084205 | serine/threonine protein kinase TAO1                                               | 6.9   | 6.1  |
| AF084576 | delta-like 3 (Drosophila)                                                          | 46.5  | 18.3 |
| AF084576 | delta-like 3 (Drosophila)                                                          | 3     | 1.1  |
| AF085195 | nitric oxide synthase 3                                                            | 6.9   | 10.3 |

|          |                                                                        |      |      |
|----------|------------------------------------------------------------------------|------|------|
| AF085693 | G protein-coupled receptor kinase-interactor 1                         | 20.4 | 10.9 |
| AF085693 | G protein-coupled receptor kinase-interactor 1                         | 6.8  | 5.1  |
| AF086624 | serine threonine kinase pim3                                           | 13.7 | 14.3 |
| AF086758 | solute carrier family 12, member 2                                     | 6.9  | 6.9  |
| AF086758 | solute carrier family 12, member 2                                     | 3.7  | 1.9  |
| AF087037 | B-cell translocation gene 3                                            | 15.6 | 4.7  |
| AF087037 | B-cell translocation gene 3                                            | 10.7 | 2.3  |
| AF087431 | glucosidase 1                                                          | 58.5 | 43.7 |
| AF087453 | potassium voltage-gated channel, KQT-like subfamily, member 2          | 13.2 | 8.5  |
| AF087454 | potassium voltage-gated channel, subfamily Q, member 3                 | 3.3  | 1.2  |
| AF087674 | insulin receptor substrate-2                                           | 11.5 | 5.7  |
| AF087696 | membrane protein, palmitoylated 2 (MAGUK p55 subfamily member 2)       | 38   | 17.2 |
| AF087838 | ATP-binding cassette, sub-family C (CFTR/MRP), member 9                | 9    | 3.9  |
| AF087839 | ATP-binding cassette, sub-family C (CFTR/MRP), member 9                | 18.1 | 19   |
| AF087839 | ATP-binding cassette, sub-family C (CFTR/MRP), member 9                | 12.1 | 8.6  |
| AF087945 | GRP1 binding protein GRSP1                                             | 23.2 | 11.6 |
| AF089730 | potassium channel subunit (Slack)                                      | 1.7  | 0.7  |
| AF089825 | activin beta E                                                         | 19.8 | 10.7 |
| AF089839 | N-ethylmaleimide sensitive factor                                      | 11.7 | 13.9 |
| AF090113 | glutamate receptor interacting protein 2                               | 48.6 | 33.2 |
| AF090113 | glutamate receptor interacting protein 2                               | 29.8 | 4.2  |
| AF090133 | lin-7-A                                                                | 2.5  | 1.1  |
| AF090134 | lin-7-Ba                                                               | 27.3 | 6.7  |
| AF090134 | lin-7-Ba                                                               | 13.3 | 9.8  |
| AF090135 | lin-7-Ba                                                               | 3.8  | 5.7  |
| AF090136 | lin 7 homolog C (C. elegans)                                           | 6.6  | 9.6  |
| AF090692 | cystatin 8                                                             | 12.9 | 11   |
| AF090692 | cystatin 8                                                             | 7.5  | 5.3  |
| AF090867 | guanosine monophosphate reductase                                      | 30.8 | 26.6 |
| AF090867 | guanosine monophosphate reductase                                      | 3    | 3.5  |
| AF091247 | potassium voltage-gated channel, subfamily Q, member 3                 | 32.2 | 9.8  |
| AF091562 | QLL-TN1 olfactory receptor                                             | 23.6 | 18.1 |
| AF091563 | QIL-LD1 olfactory receptor                                             | 18.5 | 9.4  |
| AF091563 | QIL-LD1 olfactory receptor                                             | 14.1 | 8    |
| AF091565 | QFG-TN1 olfactory recepto                                              | 33   | 16.9 |
| AF091566 | olfactory protein                                                      | 98   | 31.4 |
| AF091567 | olfactory receptor 41                                                  | 44.4 | 16.1 |
| AF091572 | olfactory receptor 41                                                  | 13.6 | 9.3  |
| AF091574 | olfactory receptor 41                                                  | 37.2 | 22.3 |
| AF091575 | HFV-FD1 olfactory receptor                                             | 52.7 | 19.1 |
| AF091576 | Rattus norvegicus isolate HFL-VN1 olfactory receptor mRNA, partial cds | 56.7 | 34.7 |
| AF091577 | HAF-TP1 olfactory receptor                                             | 32.8 | 13   |
| AF091578 | EVA-TN1 olfactory receptor                                             | 15.7 | 14.4 |
| AF091579 | EVA-TD1 olfactory receptor                                             | 6.9  | 4.3  |
| AF091580 | EGL-TP1 olfactory receptor                                             | 13.9 | 8.7  |
| AF091715 | thyrotropin releasing hormone receptor 2                               | 24.8 | 7.9  |
| AF091834 | N-ethylmaleimide sensitive factor                                      | 2.7  | 0.7  |
| AF092090 | outer dense fiber ODF3                                                 | 3.5  | 4.3  |
| AF092091 | testis specific, 10                                                    | 12.5 | 5.3  |
| AF092450 | mitogen activated protein kinase 8 interacting protein                 | 3.2  | 1    |
| AF092523 | A kinase (PRKA) anchor protein 1                                       | 36.3 | 21.7 |
| AF092523 | A kinase (PRKA) anchor protein 1                                       | 14.3 | 13.5 |
| AF092523 | A kinase (PRKA) anchor protein 1                                       | 3.1  | 1.5  |
| AF092733 | growth differentiation factor 11                                       | 1.7  | 0.7  |
| AF093267 | homer, neuronal immediate early gene, 1                                | 15.4 | 13.6 |
| AF093268 | homer, neuronal immediate early gene, 1                                | 21.7 | 9.7  |
| AF093536 | defensin beta 1                                                        | 15.4 | 7.5  |
| AF093569 | XLas protein                                                           | 3.4  | 1.4  |
| AF093625 | terine luminal fluid ULF-250                                           | 1.8  | 1.8  |
| AF095741 | Mg87 protein                                                           | 78.6 | 23.7 |
| AF095741 | Mg87 protein                                                           | 14.9 | 20.6 |
| AF095927 | protein phosphatase 2C                                                 | 13.5 | 9.8  |
| AF095927 | protein phosphatase 2C                                                 | 13.3 | 3.9  |
| AF096269 | EH domain binding protein epsin 2                                      | 50.8 | 13.3 |
| AF096291 | Bcl-w protein                                                          | 22.1 | 16.3 |
| AF096835 | eukaryotic translation initiation factor 2 alpha kinase 3              | 20.5 | 19.7 |
| AF096835 | eukaryotic translation initiation factor 2 alpha kinase 3              | 17.9 | 15.9 |
| AF097593 | cadherin 2                                                             | 17.4 | 8.6  |
| AF097593 | cadherin 2                                                             | 6.3  | 7.5  |
| AF097723 | plasma glutamate carboxypeptidase                                      | 3.7  | 1.6  |
| AF097887 | ras homolog gene family, member V                                      | 12.2 | 12.7 |
| AF098301 | neural F box protein NFB42                                             | 35.4 | 25.6 |
| AF099093 | ubiquitin-conjugating enzyme UBC7                                      | 15.3 | 8.2  |
| AF099093 | ubiquitin-conjugating enzyme UBC7                                      | 9.4  | 5.6  |
| AF102552 | ankyrin 3 (G)                                                          | 24.5 | 14.7 |
| AF102804 | adenosine A3 receptor                                                  | 34.3 | 19   |
| AF102853 | membrane-associated guanylate kinase-interacting protein               | 12.3 | 15.2 |
| AF102853 | membrane-associated guanylate kinase-interacting protein               | 9.6  | 9.9  |
| AF102854 | membrane-associated guanylate kinase-interacting protein               | 26.5 | 9.2  |

|          |                                                                                                                                                                                                                                            |       |      |
|----------|--------------------------------------------------------------------------------------------------------------------------------------------------------------------------------------------------------------------------------------------|-------|------|
| AF102855 | Shank1                                                                                                                                                                                                                                     | 48    | 41   |
| AF104362 | osteomodulin (osteoaderhin)                                                                                                                                                                                                                | 6.7   | 7.7  |
| AF104399 | melanocyte-specific gene 1 protein                                                                                                                                                                                                         | 44.3  | 23.6 |
| AF104399 | melanocyte-specific gene 1 protein                                                                                                                                                                                                         | 5.5   | 4.1  |
| AF106563 | ATP-binding cassette, sub-family B (MDR/TAP), member 6                                                                                                                                                                                     | 11.4  | 12.4 |
| AF107727 | sertolin                                                                                                                                                                                                                                   | 14    | 6    |
| AF109405 | G protein-coupled receptor 51                                                                                                                                                                                                              | 25.8  | 12.4 |
| AF110508 | nitric oxide synthase 3                                                                                                                                                                                                                    | 15.8  | 20.3 |
| AI007530 | cDNA clone RPCAZ19 similar to NADH-ubiquinone oxidoreductase, MLRQ subunit, mRNA sequence [Rattus sp.]                                                                                                                                     | 10.7  | 14.9 |
| AI007614 | Transcribed sequence with strong similarity to protein ref:NP_032722.1 (M.musculus) mitogen-activated protein kinase kinase kinase kinase 4; NCK interacting kinase; HPK/GCK-like kinase [Mus musculus]                                    | 36.1  | 14.2 |
| AI007835 | double cortin and calcium/calmodulin-dependent protein kinase-like 1                                                                                                                                                                       | 6.1   | 7.4  |
| AI007857 | HGF-regulated tyrosine kinase substrate                                                                                                                                                                                                    | 34.3  | 34.9 |
| AI008020 | malic enzyme 1                                                                                                                                                                                                                             | 19.1  | 13.8 |
| AI008131 | S-adenosylmethionine decarboxylase 1                                                                                                                                                                                                       | 11.1  | 7.5  |
| AI008423 | unc-50 related protein (UNCL)                                                                                                                                                                                                              | 90.4  | 62.2 |
| AI008638 | milk fat globule-EGF factor 8 protein                                                                                                                                                                                                      | 38.2  | 25.1 |
| AI008639 | MAD homolog 4 (Drosophila)                                                                                                                                                                                                                 | 13    | 13.8 |
| AI008677 | 3-phosphoglycerate dehydrogenase                                                                                                                                                                                                           | 4.6   | 2.6  |
| AI008741 | Hyaluronan synthase 2                                                                                                                                                                                                                      | 7.4   | 6.7  |
| AI008863 | Transcribed sequence with strong similarity to protein ref:NP_080446.1 (M.musculus) RIKEN cDNA 1200007D18 [Mus musculus]                                                                                                                   | 67    | 12.2 |
| AI009095 | RAB2, member RAS oncogene family                                                                                                                                                                                                           | 15.7  | 14.7 |
| AI009098 | oxygen regulated protein (150kD)                                                                                                                                                                                                           | 29.8  | 21.3 |
| AI009141 | Transcribed sequences                                                                                                                                                                                                                      | 24.7  | 14.8 |
| AI009297 | Transcribed sequences                                                                                                                                                                                                                      | 48    | 41.3 |
| AI009338 | glycine-, glutamate-, thienylcyclohexylpiperidine-binding protein                                                                                                                                                                          | 11.4  | 9.1  |
| AI009338 | glycine-, glutamate-, thienylcyclohexylpiperidine-binding protein                                                                                                                                                                          | 10.9  | 11.7 |
| AI009405 | insulin-like growth factor binding protein 3                                                                                                                                                                                               | 24.1  | 21.1 |
| AI009524 | secretoglobin, family 1A, member 1                                                                                                                                                                                                         | 22.6  | 39.3 |
| AI009658 | chemokine (C-C motif) ligand 5                                                                                                                                                                                                             | 3.8   | 1    |
| AI009682 | aspartyl-tRNA synthetase                                                                                                                                                                                                                   | 6.9   | 5.5  |
| AI009771 | arginine-glutamic acid dipeptide (RE) repeats                                                                                                                                                                                              | 17.5  | 9.5  |
| AI009801 | macrophage migration inhibitory factor                                                                                                                                                                                                     | 63.2  | 24.8 |
| AI009806 | dynein, cytoplasmic, light chain 1                                                                                                                                                                                                         | 146.6 | 45   |
| AI010293 | HLA-B-associated transcript 3                                                                                                                                                                                                              | 37.8  | 37.1 |
| AI010371 | Transcribed sequences                                                                                                                                                                                                                      | 8.7   | 8.9  |
| AI010453 | serine (or cysteine) proteinase inhibitor, clade A, member 1                                                                                                                                                                               | 50.2  | 37.1 |
| AI010580 | Transcribed sequences                                                                                                                                                                                                                      | 16.5  | 14.5 |
| AI011376 | Transcribed sequence with moderate similarity to protein sp:P49138 (M.musculus) MKK2_MOUSE MAP kinase-activated protein kinase 2 (MAPK-activated protein kinase 2) (MAPKAP kinase 2) (MAPKAPK-2)                                           | 26.8  | 5.1  |
| AI011498 | SWI/SNF related, matrix associated, actin dependent regulator of chromatin, subfamily d, member 2                                                                                                                                          | 37.2  | 12   |
| AI011556 | Transcribed sequences                                                                                                                                                                                                                      | 34.5  | 16.6 |
| AI011706 | Transcribed sequence with weak similarity to protein sp:Q09167 (R.norvegicus) SFR5_RAT Splicing factor, arginine/serine-rich 5 (Pre-mRNA splicing factor SRP40) (Insulin-induced growth response protein CL-4) (Delayed-early protein HRS) | 23.8  | 10.3 |
| AI011727 | adenylate cyclase 5                                                                                                                                                                                                                        | 5.9   | 7.5  |
| AI011746 | Transcribed sequence with strong similarity to protein ref:NP_114131.1 (H.sapiens) transmembrane protein induced by tumor necrosis factor alpha [Homo sapiens]                                                                             | 27.8  | 11.2 |
| AI011998 | dnaJ homolog, subfamily b, member 9                                                                                                                                                                                                        | 9.1   | 7.3  |
| AI012030 | matrix Gla protein                                                                                                                                                                                                                         | 47.6  | 30.6 |
| AI012051 | Transcribed sequences                                                                                                                                                                                                                      | 51.7  | 32   |
| AI012183 | nuclear receptor subfamily 2, group F, member 2                                                                                                                                                                                            | 3.3   | 1.5  |
| AI012275 | developmentally regulated protein TPO1                                                                                                                                                                                                     | 9.5   | 8.7  |
| AI012593 | Hexokinase 1                                                                                                                                                                                                                               | 27.5  | 18.3 |
| AI012942 | cell division cycle 25B                                                                                                                                                                                                                    | 14.9  | 13.2 |
| AI012942 | cell division cycle 25B                                                                                                                                                                                                                    | 6.3   | 7.7  |
| AI013074 | Transcribed sequence with weak similarity to protein ref:NP_035569.1 (M.musculus) SRY-box containing gene 13 [Mus musculus]                                                                                                                | 23.2  | 14.4 |
| AI013107 | kinesin family member 3C                                                                                                                                                                                                                   | 80.6  | 41.8 |
| AI013129 | unconventional myosin Myr2 I heavy chain                                                                                                                                                                                                   | 19.2  | 16.2 |
| AI013365 | Transcribed sequences                                                                                                                                                                                                                      | 29.3  | 17.7 |
| AI013389 | calbindin 3                                                                                                                                                                                                                                | 24.6  | 9.3  |
| AI013472 | ER transmembrane protein Dri 42                                                                                                                                                                                                            | 26.1  | 8.9  |
| AI013523 | prolactin-like protein D                                                                                                                                                                                                                   | 4.3   | 2.6  |
| AI013795 | dorsal protein 1                                                                                                                                                                                                                           | 17    | 7    |
| AI013861 | 3-hydroxyisobutyrate dehydrogenase                                                                                                                                                                                                         | 30    | 13.7 |
| AI013987 | Protein kinase, interferon-inducible double stranded RNA dependent                                                                                                                                                                         | 2.6   | 1.9  |
| AI013993 | Transcribed sequence with moderate similarity to protein sp:Q14687 (H.sapiens) Y182_HUMAN Hypothetical protein KIAA0182                                                                                                                    | 45.6  | 36.6 |
| AI014020 | insulin 2                                                                                                                                                                                                                                  | 5.9   | 2.6  |
| AI014094 | Transcribed sequence with moderate similarity to protein ref:NP_055153.1 (H.sapiens) phosphatidylserine decarboxylase [Homo sapiens]                                                                                                       | 14.5  | 9.6  |
| AI014135 | Transcribed sequences                                                                                                                                                                                                                      | 23.1  | 5.4  |
| AI014163 | interferon-related developmental regulator 1                                                                                                                                                                                               | 1.8   | 1.1  |
| AI028836 | sulfotransferase, hydroxysteroid preferring 2                                                                                                                                                                                              | 11.8  | 8.5  |

|          |                                                                                                                                                                                                    |      |      |
|----------|----------------------------------------------------------------------------------------------------------------------------------------------------------------------------------------------------|------|------|
| AI029183 | gap junction membrane channel protein alpha 1                                                                                                                                                      | 1.2  | 0.6  |
| AI029279 | neuroligin 1                                                                                                                                                                                       | 4.3  | 2.4  |
| AI029920 | insulin-like growth factor-binding protein 5                                                                                                                                                       | 25   | 23.3 |
| AI030089 | nucleolar phosphoprotein p130                                                                                                                                                                      | 23.1 | 2.5  |
| AI030175 | sorbitol dehydrogenase                                                                                                                                                                             | 51.4 | 27.2 |
| AI030286 | brain derived neurotrophic factor                                                                                                                                                                  | 10.5 | 14.1 |
| AI030685 | Nestin                                                                                                                                                                                             | 7    | 5.1  |
| AI030997 | toll-like receptor 4                                                                                                                                                                               | 9.4  | 5.9  |
| AI031019 | translation initiation factor eIF-2B alpha-subunit                                                                                                                                                 | 16.4 | 14   |
| AI031019 | translation initiation factor eIF-2B alpha-subunit                                                                                                                                                 | 10.8 | 8.6  |
| AI043631 | ornithine decarboxylase antizyme inhibitor                                                                                                                                                         | 6.5  | 3.2  |
| AI043643 | GTP cyclohydrolase 1                                                                                                                                                                               | 7    | 2.7  |
| AI043684 | serine threonine kinase 39 (STE20/SPS1 homolog, yeast)                                                                                                                                             | 16.8 | 19.9 |
| AI043796 | solute carrier family 18, member 2                                                                                                                                                                 | 21.3 | 8.5  |
| AI043861 | ruvB-like protein 1                                                                                                                                                                                | 21.1 | 14   |
| AI043968 | caveolin 3                                                                                                                                                                                         | 7.8  | 4.7  |
| AI043968 | caveolin 3                                                                                                                                                                                         | 5    | 1.8  |
| AI044110 | thymopoietin                                                                                                                                                                                       | 7.9  | 4.3  |
| AI044254 | pyridoxal kinase                                                                                                                                                                                   | 22.2 | 7.5  |
| AI044259 | putative cell surface antigen                                                                                                                                                                      | 19.4 | 8.2  |
| AI044488 | ferredoxin 1                                                                                                                                                                                       | 12   | 10.9 |
| AI044508 | Brain specific mRNA B (clone p1a75)                                                                                                                                                                | 2.9  | 2    |
| AI044517 | solute carrier family 1, member 2                                                                                                                                                                  | 22.9 | 14.2 |
| AI044517 | solute carrier family 1, member 2                                                                                                                                                                  | 15   | 13.5 |
| AI044716 | neuronal pentraxin 1                                                                                                                                                                               | 28   | 12.7 |
| AI044848 | adenylate cyclase 5                                                                                                                                                                                | 16.2 | 10.1 |
| AI044900 | fatty acid Coenzyme A ligase, long chain 2                                                                                                                                                         | 8.6  | 8    |
| AI044985 | gap junction membrane channel protein beta 5                                                                                                                                                       | 68   | 43.7 |
| AI044985 | gap junction membrane channel protein beta 5                                                                                                                                                       | 48.5 | 29.6 |
| AI045002 | fatty acid Coenzyme A ligase, long chain 4                                                                                                                                                         | 11.9 | 7.5  |
| AI045030 | CCAAT/enhancerbinding, protein (C/EBP) delta                                                                                                                                                       | 13.4 | 10.1 |
| AI045315 | potassium voltage gated channel, Shaw-related subfamily, member 3                                                                                                                                  | 26.5 | 19.5 |
| AI045395 | isopentenyl-diphosphate delta isomerase                                                                                                                                                            | 6.4  | 9    |
| AI045440 | sialophorin                                                                                                                                                                                        | 5.6  | 4    |
| AI045794 | Transcribed sequence with strong similarity to protein pir:JH0304 (M.musculus) JH0304 histone H3.2 - mouse                                                                                         | 7.4  | 8.7  |
| AI045858 | Transcribed sequence with weak similarity to protein ref:NP_113835.1 (R.norvegicus) Scm-related gene containing four mbt domains [Rattus norvegicus]                                               | 17.3 | 14.5 |
| AI058393 | Arg/Abl-interacting protein ArgBP2                                                                                                                                                                 | 5.5  | 0.7  |
| AI058601 | ankyrin 3 (G)                                                                                                                                                                                      | 8.6  | 3    |
| AI058601 | ankyrin 3 (G)                                                                                                                                                                                      | 6    | 10.6 |
| AI058941 | Transcribed sequence with strong similarity to protein ref:NP_071633.1 (R.norvegicus) dimethylarginine dimethylaminohydrolase 1; NG,NG dimethylarginine dimethylaminohydrolase [Rattus norvegicus] | 11.4 | 4.1  |
| AI059042 | kinase substrate HASPP28                                                                                                                                                                           | 16.3 | 10.2 |
| AI059137 | myosin IE                                                                                                                                                                                          | 7.4  | 6.3  |
| AI059291 | protein kinase, cAMP-dependent, regulatory, type 2, alpha                                                                                                                                          | 72.9 | 37.3 |
| AI059540 | diphtheria toxin receptor                                                                                                                                                                          | 5.5  | 3.8  |
| AI059692 | Eukaryotic elongation factor 2 kinase                                                                                                                                                              | 6.4  | 4.6  |
| AI059933 | cell division cycle 25A                                                                                                                                                                            | 3.6  | 1.1  |
| AI060085 | Thyroid stimulating hormone receptor                                                                                                                                                               | 11.4 | 6.9  |
| AI069982 | Ser-Thr protein kinase related to the myotonic dystrophy protein kinase                                                                                                                            | 7.2  | 11.3 |
| AI069990 | tripeptidylpeptidase II                                                                                                                                                                            | 21.9 | 15   |
| AI070026 | Homeo box A2                                                                                                                                                                                       | 39.1 | 24   |
| AI070106 | serine (or cysteine) proteinase inhibitor, clade B, member 5                                                                                                                                       | 2.2  | 1.2  |
| AI070124 | sortilin 1                                                                                                                                                                                         | 7.8  | 7.9  |
| AI070142 | Propionyl Coenzyme A carboxylase, beta polypeptide                                                                                                                                                 | 13   | 15.2 |
| AI070277 | proteolipid protein                                                                                                                                                                                | 84.3 | 28.6 |
| AI070512 | neurexin 2                                                                                                                                                                                         | 12.1 | 13.2 |
| AI070521 | unr protein                                                                                                                                                                                        | 33   | 21   |
| AI070577 | insulin-like growth factor-binding protein 5                                                                                                                                                       | 19.5 | 17.3 |
| AI070721 | glial cell line derived neurotrophic factor family receptor alpha 1                                                                                                                                | 11.5 | 9.5  |
| AI070783 | rabin 3                                                                                                                                                                                            | 4.9  | 4.9  |
| AI070967 | acidic nuclear phosphoprotein 32 family, member A                                                                                                                                                  | 21.3 | 19.5 |
| AI070994 | v-maf musculoaponeurotic fibrosarcoma (avian) oncogene homolog (c-maf)                                                                                                                             | 14.7 | 15.8 |
| AI071104 | Glypican 3                                                                                                                                                                                         | 13.7 | 13.6 |
| AI071262 | trans-golgi network protein 1                                                                                                                                                                      | 7    | 5.6  |
| AI071399 | vesicle transport-related                                                                                                                                                                          | 21.7 | 11.3 |
| AI071435 | SAC2 (suppressor of actin mutations 2, homolog)-like (S. cerevisiae)                                                                                                                               | 35.2 | 31.6 |
| AI071498 | MAS1 oncogene                                                                                                                                                                                      | 1.5  | 0.7  |
| AI071507 | tripeptidylpeptidase II                                                                                                                                                                            | 3.4  | 2.3  |
| AI071511 | afadin                                                                                                                                                                                             | 10.4 | 7.8  |
| AI071531 | oxidised low density lipoprotein (lectin-like) receptor 1                                                                                                                                          | 20.6 | 15.4 |
| AI071947 | proline rich synapse associated protein 1                                                                                                                                                          | 10.9 | 10.7 |
| AI072089 | casein kinase II, alpha 1 polypeptide                                                                                                                                                              | 17.1 | 11   |
| AI072098 | neuronal pentraxin 1                                                                                                                                                                               | 11.3 | 8.4  |
| AI072341 | vacuolar protein sorting homolog r-vps33b                                                                                                                                                          | 8.4  | 3.5  |
| AI072341 | vacuolar protein sorting homolog r-vps33b                                                                                                                                                          | 7    | 6.3  |
| AI072447 | 130kDa-Ins(1,4,5)P3 binding protein                                                                                                                                                                | 42.6 | 19.4 |
| AI072634 | keratin complex 1, acidic, gene 18                                                                                                                                                                 | 8.4  | 7.2  |



|          |                                                                                                                                                                                               |       |      |
|----------|-----------------------------------------------------------------------------------------------------------------------------------------------------------------------------------------------|-------|------|
| AI072770 | proteolipid protein                                                                                                                                                                           | 8.2   | 8.6  |
| AI072943 | Transcribed sequences                                                                                                                                                                         | 10    | 12.6 |
| AI073232 | proprotein convertase subtilisin / kexin, type 7                                                                                                                                              | 6.7   | 3.7  |
| AI101103 | vesicle-associated membrane protein 2                                                                                                                                                         | 79    | 43.9 |
| AI101320 | jagged 2                                                                                                                                                                                      | 29.5  | 5.5  |
| AI101743 | peroxisomal multifunctional enzyme type II                                                                                                                                                    | 15.2  | 8.5  |
| AI102031 | myc box dependent interacting protein 1                                                                                                                                                       | 84.9  | 35.1 |
| AI102031 | myc box dependent interacting protein 1                                                                                                                                                       | 29.9  | 32.5 |
| AI102079 | Syntaxin binding protein 1                                                                                                                                                                    | 50.2  | 21.6 |
| AI102103 | phosphatidylinositol 4-kinase                                                                                                                                                                 | 32.6  | 6.2  |
| AI102103 | phosphatidylinositol 4-kinase                                                                                                                                                                 | 24.8  | 18.6 |
| AI102205 | vesicle-associated calmodulin-binding protein                                                                                                                                                 | 18.5  | 13.3 |
| AI102299 | BH3 interacting domain 3                                                                                                                                                                      | 8.3   | 6.1  |
| AI102411 | clathrin, light polypeptide (Lcb)                                                                                                                                                             | 13.7  | 9    |
| AI102562 | Metallothionein                                                                                                                                                                               | 154   | 52.7 |
| AI102795 | Pleiotrophin (Heparine binding factor, Hbnf, in the mouse)                                                                                                                                    | 8.3   | 9    |
| AI102814 | lysyl oxidase                                                                                                                                                                                 | 6.6   | 4.7  |
| AI102838 | Isovaleryl Coenzyme A dehydrogenase                                                                                                                                                           | 15.3  | 14.4 |
| AI102839 | calbindin 1                                                                                                                                                                                   | 76.9  | 27.3 |
| AI102839 | calbindin 1                                                                                                                                                                                   | 11.5  | 8.4  |
| AI102868 | Rattus norvegicus phosphoserine aminotransferase mRNA, complete cds                                                                                                                           | 19.3  | 11.6 |
| AI102868 | Rattus norvegicus phosphoserine aminotransferase mRNA, complete cds                                                                                                                           | 15.6  | 12.3 |
| AI103238 | protein phosphatase 2 (formerly 2A), regulatory subunit B (PR 52), beta isoform                                                                                                               | 14.5  | 15   |
| AI103396 | Transcribed sequences                                                                                                                                                                         | 42.5  | 19.3 |
| AI103671 | ATPase, Ca++ transporting, plasma membrane 1                                                                                                                                                  | 4.2   | 2.2  |
| AI103698 | UDP-glucose dehydrogenase                                                                                                                                                                     | 19.2  | 10.3 |
| AI103838 | heat shock 20-kDa protein                                                                                                                                                                     | 17.7  | 12.2 |
| AI103838 | heat shock 20-kDa protein                                                                                                                                                                     | 15.8  | 13.5 |
| AI103874 | Transcribed sequence with weak similarity to protein ref:NP_445760.1 (R.norvegicus) FK506 binding protein 2 (13 kDa) [Rattus norvegicus]                                                      | 7.1   | 4.7  |
| AI103911 | Transcribed sequence with strong similarity to protein pir:A32296 (R.norvegicus) A32296 ubiquinol--cytochrome-c reductase (EC 1.10.2.2) Rieske iron-sulfur protein precursor - rat (fragment) | 54.3  | 18.7 |
| AI103920 | myosin heavy chain, polypeptide 6                                                                                                                                                             | 2.8   | 1.4  |
| AI104012 | dual-specificity tyrosine-(Y)-phosphorylation regulated kinase 1A                                                                                                                             | 19.1  | 13.3 |
| AI104077 | Transcribed sequences                                                                                                                                                                         | 11.1  | 9.5  |
| AI104225 | Laminin chain beta 2                                                                                                                                                                          | 3.3   | 2.1  |
| AI104388 | heat shock 27kDa protein 1                                                                                                                                                                    | 19.9  | 18.5 |
| AI104389 | Tyrosine hydroxylase                                                                                                                                                                          | 20.2  | 8    |
| AI104389 | Tyrosine hydroxylase                                                                                                                                                                          | 6.2   | 8.8  |
| AI104500 | ecto-apyrase                                                                                                                                                                                  | 36.6  | 21.3 |
| AI104567 | actin alpha cardiac 1                                                                                                                                                                         | 16.8  | 9.3  |
| AI104707 | caveolin 3                                                                                                                                                                                    | 38.4  | 20.2 |
| AI104781 | arachidonate 5-lipoxygenase activating protein                                                                                                                                                | 14.8  | 10.3 |
| AI104882 | cytosolic epoxide hydrolase                                                                                                                                                                   | 80    | 47.3 |
| AI104924 | myosin heavy chain, polypeptide 6                                                                                                                                                             | 19    | 17.8 |
| AI105044 | estrous-specific protein, 250 kDa                                                                                                                                                             | 20.7  | 9.3  |
| AI105054 | coatamer protein complex, subunit beta 1                                                                                                                                                      | 20.5  | 14.1 |
| AI105076 | Murine thymoma viral (v-akt) oncogene homolog 2                                                                                                                                               | 9     | 8.7  |
| AI105137 | glutathione S-transferase, mitochondrial                                                                                                                                                      | 16.9  | 11.9 |
| AI105198 | solute carrier family 34, member 1                                                                                                                                                            | 12.4  | 12.4 |
| AI105348 | cofilin 1                                                                                                                                                                                     | 223   | 62   |
| AI105374 | Tropomyosin 4                                                                                                                                                                                 | 152.8 | 94.9 |
| AI105463 | V-1 protein                                                                                                                                                                                   | 15.7  | 4.5  |
| AI111401 | multiple inositol polyphosphate histidine phosphatase 1                                                                                                                                       | 13.3  | 9.7  |
| AI111481 | fibromodulin                                                                                                                                                                                  | 18.5  | 10   |
| AI113046 | alpha-2-macroglobulin                                                                                                                                                                         | 4.8   | 4.6  |
| AI136118 | adducin 2, beta                                                                                                                                                                               | 29.3  | 17.9 |
| AI136174 | protein tyrosine phosphatase, receptor type, O                                                                                                                                                | 8.4   | 7    |
| AI136175 | Rab38, member of RAS oncogene family                                                                                                                                                          | 7.4   | 4.9  |
| AI136396 | farnesyltransferase beta subunit                                                                                                                                                              | 37.1  | 15.1 |
| AI136540 | Transcribed sequence with strong similarity to protein sp:P09739 (R.norvegicus) TRT3_RAT Troponin T, fast skeletal muscle isoforms beta/alpha (Beta/alpha TnTF)                               | 12.6  | 6.5  |
| AI136914 | frequenin homolog (Drosophila)                                                                                                                                                                | 9.8   | 3.2  |
| AI136950 | delta-like 1 (Drosophila)                                                                                                                                                                     | 112.6 | 45.4 |
| AI136977 | FK506 binding protein 4 (59 kDa)                                                                                                                                                              | 66    | 19.8 |
| AI136977 | FK506 binding protein 4 (59 kDa)                                                                                                                                                              | 14.3  | 15.7 |
| AI137043 | Transcribed sequence with strong similarity to protein pir:I56570 (R.norvegicus) I56570 beta-nerve growth factor - rat (fragment)                                                             | 23.6  | 10.2 |
| AI137246 | neural cell adhesion molecule 1                                                                                                                                                               | 20.4  | 9.2  |
| AI137331 | Rho-associated kinase beta                                                                                                                                                                    | 21.4  | 15.6 |
| AI137421 | glutamate dehydrogenase 1                                                                                                                                                                     | 73.1  | 26.6 |
| AI137470 | lectin, mannose-binding, 1                                                                                                                                                                    | 5.3   | 2.1  |
| AI137484 | protein tyrosine phosphatase, receptor type, N                                                                                                                                                | 5.7   | 2    |
| AI137538 | nuclear receptor subfamily 3, group C, member 1                                                                                                                                               | 6.7   | 0.3  |
| AI137657 | Platelet-derived growth factor receptor alpha                                                                                                                                                 | 3.9   | 2.3  |
| AI137790 | R.norvegicus mRNA from Leydig cell hypercalcemic tumour H-500                                                                                                                                 | 10.9  | 3.3  |
| AI138070 | protein tyrosine phosphatase, non-receptor type 11                                                                                                                                            | 5.2   | 1    |
| AI138143 | glutathione S-transferase, theta 2                                                                                                                                                            | 13.5  | 15   |
| AI144709 | regulator of G-protein signaling 8                                                                                                                                                            | 9.4   | 11.5 |

|          |                                                                                                                                                                                                                 |       |      |
|----------|-----------------------------------------------------------------------------------------------------------------------------------------------------------------------------------------------------------------|-------|------|
| AI144756 | solute carrier family 17 (sodium-dependent inorganic phosphate cotransporter), member 7                                                                                                                         | 4     | 2.2  |
| AI144767 | tropomyosin 1, alpha                                                                                                                                                                                            | 4.5   | 2.7  |
| AI144873 | early growth response 4                                                                                                                                                                                         | 24.4  | 19.9 |
| AI144926 | discs, large homolog 1 (Drosophila)                                                                                                                                                                             | 6.2   | 5.1  |
| AI145044 | Glycine receptor alpha 2 subunit (glycine receptor, neonatal)                                                                                                                                                   | 24.7  | 7.5  |
| AI145367 | adenylyl cyclase-associated protein 2                                                                                                                                                                           | 8.4   | 5.7  |
| AI145444 | actin-binding protein neurabin                                                                                                                                                                                  | 8.8   | 15.8 |
| AI145490 | lamin B receptor                                                                                                                                                                                                | 3.8   | 2.5  |
| AI145494 | synapsin 2                                                                                                                                                                                                      | 5.4   | 3.4  |
| AI145494 | synapsin 2                                                                                                                                                                                                      | 5     | 6.7  |
| AI145502 | prostaglandin F2 receptor negative regulator                                                                                                                                                                    | 5.1   | 3.8  |
| AI145680 | solute carrier family 16, member 1                                                                                                                                                                              | 15.4  | 5.7  |
| AI145834 | neuron-derived orphan receptor                                                                                                                                                                                  | 5.6   | 5    |
| AI145931 | UDP-N-acetylglucosamine-2-epimerase/N-acetylmannosamine kinase                                                                                                                                                  | 48.6  | 9.3  |
| AI146214 | S100 calcium-binding protein, beta (neural)                                                                                                                                                                     | 13.7  | 8.4  |
| AI168942 | branched chain keto acid dehydrogenase E1, beta polypeptide                                                                                                                                                     | 20.3  | 4.3  |
| AI169005 | chloride channel, nucleotide-sensitive, 1A                                                                                                                                                                      | 15.8  | 16.2 |
| AI169327 | tissue inhibitor of metalloproteinase 1                                                                                                                                                                         | 54.2  | 15.5 |
| AI169327 | tissue inhibitor of metalloproteinase 1                                                                                                                                                                         | 7.9   | 7.1  |
| AI169372 | arachidonic acid epoxigenase                                                                                                                                                                                    | 30.2  | 13.6 |
| AI169372 | arachidonic acid epoxigenase                                                                                                                                                                                    | 12.5  | 15.8 |
| AI169612 | fatty acid binding protein 4                                                                                                                                                                                    | 15.2  | 11.9 |
| AI169631 | Prohibitin                                                                                                                                                                                                      | 12.7  | 6.7  |
| AI169695 | Rattus norvegicus mRNA for hydroxysteroid sulfotransferase subunit, complete cds                                                                                                                                | 7.3   | 4.6  |
| AI169708 | UDP glycosyltransferase 2 family, polypeptide B                                                                                                                                                                 | 5.1   | 5.4  |
| AI169735 | cytochrome P450IIB3                                                                                                                                                                                             | 3.2   | 1.4  |
| AI169735 | cytochrome P450IIB3                                                                                                                                                                                             | 2     | 1.2  |
| AI169756 | Transcribed sequence with strong similarity to protein sp:P05432 (R.norvegicus) G33_RAT GENE 33 POLYPEPTIDE                                                                                                     | 10.2  | 8.2  |
| AI169758 | apolipoprotein C-III                                                                                                                                                                                            | 103.9 | 68.3 |
| AI170212 | adaptor-related protein complex 3, mu 2 subunit                                                                                                                                                                 | 12.9  | 2.8  |
| AI170379 | Transcribed sequence with strong similarity to protein sp:O54931 (M.musculus) AKA2_MOUSE A-kinase anchor protein 2 (Protein kinase A anchoring protein 2) (PRKA2) (AKAP expressed in kidney and lung) (AKAP KL) | 24    | 10   |
| AI170380 | surfactant, pulmonary-associated protein B                                                                                                                                                                      | 24    | 9.7  |
| AI170380 | surfactant, pulmonary-associated protein B                                                                                                                                                                      | 8.6   | 5.6  |
| AI170411 | dipeptidase 1                                                                                                                                                                                                   | 3.8   | 0.4  |
| AI170568 | dodecenoyl-coenzyme A delta isomerase                                                                                                                                                                           | 26.7  | 20.7 |
| AI170608 | zinc finger protein 265                                                                                                                                                                                         | 26.2  | 7.9  |
| AI170685 | DnaJ (Hsp40) homolog, subfamily A, member 2                                                                                                                                                                     | 28.9  | 21.8 |
| AI170819 | Transcribed sequence with moderate similarity to protein pdb:1G55 (H.sapiens) A Chain A, Structure Of Human Dnmt2, An Enigmatic Dna Methyltransferase Homologue                                                 | 12.5  | 10.6 |
| AI171067 | malic enzyme 1                                                                                                                                                                                                  | 6.7   | 5    |
| AI171090 | 3-hydroxy-3-methylglutaryl CoA lyase                                                                                                                                                                            | 13.2  | 10.9 |
| AI171090 | 3-hydroxy-3-methylglutaryl CoA lyase                                                                                                                                                                            | 10.7  | 5.6  |
| AI171243 | Transcribed sequence with strong similarity to protein ref:NP_080908.1 (M.musculus) RIKEN cDNA C330026P08 [Mus musculus]                                                                                        | 2.3   | 2.6  |
| AI171274 | Chymotrypsinogen B                                                                                                                                                                                              | 10    | 3.1  |
| AI171462 | CD24 antigen                                                                                                                                                                                                    | 15.3  | 11.4 |
| AI171506 | malic enzyme 1                                                                                                                                                                                                  | 8.9   | 3.8  |
| AI171506 | malic enzyme 1                                                                                                                                                                                                  | 4.3   | 2.3  |
| AI171525 | protein tyrosine phosphatase, non-receptor type 11                                                                                                                                                              | 72.6  | 20.7 |
| AI171562 | nuclear protein E3-3                                                                                                                                                                                            | 20.2  | 9.9  |
| AI171644 | cytochrome c oxidase, subunit VIa, polypeptide 2                                                                                                                                                                | 14.6  | 9.9  |
| AI171796 | calpain 6                                                                                                                                                                                                       | 25.4  | 24.9 |
| AI171848 | apical early endosomal glycoprotein                                                                                                                                                                             | 52.8  | 16.5 |
| AI171959 | neuraminidase 2                                                                                                                                                                                                 | 8.9   | 7.8  |
| AI172017 | aldehyde dehydrogenase 2                                                                                                                                                                                        | 64.3  | 39.1 |
| AI172064 | lectin, galactose binding, soluble 1                                                                                                                                                                            | 39.5  | 27.1 |
| AI172097 | heat shock transcription factor 1                                                                                                                                                                               | 148.1 | 64.6 |
| AI172097 | heat shock transcription factor 1                                                                                                                                                                               | 6.3   | 9.3  |
| AI172247 | xanthine dehydrogenase                                                                                                                                                                                          | 7.1   | 10.4 |
| AI172476 | TGFB inducible early growth response                                                                                                                                                                            | 17.6  | 12.1 |
| AI172499 | ATPase, Ca++ transporting, plasma membrane 1                                                                                                                                                                    | 21.3  | 19.8 |
| AI172620 | Erythropoietin receptor                                                                                                                                                                                         | 21.8  | 27.8 |
| AI175208 | golgi SNAP receptor complex member 2                                                                                                                                                                            | 25.5  | 9.6  |
| AI175539 | parvalbumin                                                                                                                                                                                                     | 6.5   | 4.3  |
| AI175764 | stearoyl-Coenzyme A desaturase 1                                                                                                                                                                                | 3.1   | 2.2  |
| AI175776 | Rattus norvegicus retroviral-like ovarian specific transcript 30-1 mRNA                                                                                                                                         | 9.1   | 6.8  |
| AI175900 | v-ets erythroblastosis virus E26 oncogene homolog 1 (avian)                                                                                                                                                     | 4.8   | 5.6  |
| AI175959 | v-jun sarcoma virus 17 oncogene homolog (avian)                                                                                                                                                                 | 42.3  | 16.7 |
| AI175973 | Transcribed sequence with strong similarity to protein ref:NP_035017.1 (M.musculus) NADH dehydrogenase (ubiquinone) Fe-S protein 4; NADH dehydrogenase (ubiquinone) Fe-S protein 4 (18 kDa) [Mus musculus]      | 11.3  | 8    |
| AI176052 | adenylate kinase 3                                                                                                                                                                                              | 43.1  | 4.1  |
| AI176191 | tissue-type vomeronasal neurons putative pheromone receptor V2R2                                                                                                                                                | 20.4  | 7.7  |
| AI176253 | Transcribed sequences                                                                                                                                                                                           | 2     | 1    |
| AI176307 | R.norvegicus (F344/Crj)rearranged mRNA for T-cell receptor gamma chain (1483bp)                                                                                                                                 | 50.1  | 35.8 |
| AI176351 | tripeptidylpeptidase II                                                                                                                                                                                         | 25.7  | 15.8 |

|          |                                                                                                                                                                                                  |      |      |
|----------|--------------------------------------------------------------------------------------------------------------------------------------------------------------------------------------------------|------|------|
| AI176422 | Transcribed sequence with strong similarity to protein pir:S41115 (H.sapiens) S41115 probable flavoprotein-ubiquinone oxidoreductase (EC 1.6.5.-) - human                                        | 51.9 | 26.3 |
| AI176422 | Transcribed sequence with strong similarity to protein pir:S41115 (H.sapiens) S41115 probable flavoprotein-ubiquinone oxidoreductase (EC 1.6.5.-) - human                                        | 19.4 | 10.8 |
| AI176456 | Transcribed sequence with strong similarity to protein sp:P04355 (R.norvegicus) MT2_RAT METALLOTHIONEIN-II (MT-II)                                                                               | 48.7 | 12.6 |
| AI176461 | selectin, endothelial cell, ligand                                                                                                                                                               | 12.1 | 7.9  |
| AI176462 | programmed cell death 2                                                                                                                                                                          | 6.5  | 5.7  |
| AI176488 | nuclear factor I/B                                                                                                                                                                               | 13.5 | 11.6 |
| AI176491 | Transcribed sequence with moderate similarity to protein ref:NP_079799.1 (M.musculus) RIKEN cDNA 2310016K22; RIKEN cDNA 2310016K22 gene [Mus musculus]                                           | 27.8 | 17.5 |
| AI176504 | glutaminase                                                                                                                                                                                      | 20.1 | 12.6 |
| AI176597 | myristoylated alanine rich protein kinase C substrate                                                                                                                                            | 12.9 | 8.1  |
| AI176621 | iron-responsive element-binding protein                                                                                                                                                          | 37.8 | 20.4 |
| AI176658 | heat shock 27kDa protein 1                                                                                                                                                                       | 48.4 | 33.4 |
| AI176662 | early growth response 1                                                                                                                                                                          | 31.3 | 16.6 |
| AI176689 | mitogen-activated protein kinase kinase 6                                                                                                                                                        | 17.5 | 13.2 |
| AI176710 | nuclear receptor subfamily 4, group A, member 3                                                                                                                                                  | 5.8  | 8.5  |
| AI176726 | Transcribed sequences                                                                                                                                                                            | 12.9 | 8.5  |
| AI176778 | Transcribed sequence with strong similarity to protein pir:T46442 (H.sapiens) T46442 hypothetical protein DKFZp434F2427.1 - human                                                                | 12.8 | 10.2 |
| AI176856 | cytochrome P450, subfamily 1B, polypeptide 1                                                                                                                                                     | 27.6 | 10.9 |
| AI177004 | 3-hydroxy-3-methylglutaryl-Coenzyme A synthase 1                                                                                                                                                 | 1    | 0.2  |
| AI177026 | ATPase, Na+K+ transporting, alpha 2                                                                                                                                                              | 1.5  | 0.5  |
| AI177052 | nucleoporin 153kD                                                                                                                                                                                | 25.4 | 13.1 |
| AI177404 | Transcribed sequence with moderate similarity to protein ref:NP_444319.1 (M.musculus) RIKEN cDNA 5730450D16; RIKEN cDNA 5730450D16 gene [Mus musculus]                                           | 19.7 | 10.1 |
| AI177418 | ADP-ribosylation-like 2                                                                                                                                                                          | 4.9  | 1.5  |
| AI177919 | cytochrome P450CMF1b                                                                                                                                                                             | 34.3 | 13   |
| AI177943 | Transcribed sequence with strong similarity to protein sp:Q62931 (R.norvegicus) GS28_RAT 28 kDa Golgi SNARE protein (Golgi SNAP receptor complex member 1) (28 kDa cis-Golgi SNARE p28) (GOS-28) | 17.7 | 19.4 |
| AI178007 | tripeptidylpeptidase II                                                                                                                                                                          | 36.8 | 12.6 |
| AI178012 | Retinoblastoma 1 (including osteosarcoma)                                                                                                                                                        | 26.5 | 15.3 |
| AI178024 | Protein-L-isoaspartate (D-aspartate) O-methyltransferase                                                                                                                                         | 2.7  | 1.3  |
| AI178204 | Transcribed sequences                                                                                                                                                                            | 4.3  | 3.3  |
| AI178208 | nuclear pore membrane glycoprotein 121 kD                                                                                                                                                        | 17.8 | 17.5 |
| AI178267 | Transcribed sequence with weak similarity to protein pir:JC7185 (H.sapiens) JC7185 chromosome 1 C1orf9 protein - human                                                                           | 8.2  | 8.7  |
| AI178267 | Transcribed sequence with weak similarity to protein pir:JC7185 (H.sapiens) JC7185 chromosome 1 C1orf9 protein - human                                                                           | 2.9  | 1.9  |
| AI178828 | eukaryotic translation initiation factor 4E binding protein 1                                                                                                                                    | 102  | 49.1 |
| AI178835 | mitogen activated protein kinase kinase 1                                                                                                                                                        | 42.9 | 17.4 |
| AI178921 | Insulin degrading enzyme                                                                                                                                                                         | 14.5 | 10.2 |
| AI178971 | hemoglobin, alpha 1                                                                                                                                                                              | 25   | 29.3 |
| AI179027 | golgi peripheral membrane protein p65                                                                                                                                                            | 15.3 | 0.9  |
| AI179075 | Chorionic somatomammotropin hormone 1 variant; Placental lactogen-1                                                                                                                              | 29.3 | 19.1 |
| AI179075 | Chorionic somatomammotropin hormone 1 variant; Placental lactogen-1                                                                                                                              | 9    | 8.1  |
| AI179445 | Transcribed sequence with moderate similarity to protein pir:I60307 (E. coli) I60307 beta-galactosidase, alpha peptide - Escherichia coli                                                        | 39.8 | 23.1 |
| AI179632 | proton gated cation channel DRASIC                                                                                                                                                               | 9.5  | 7.5  |
| AI180108 | Transcribed sequence with weak similarity to protein ref:NP_072143.1 (R.norvegicus) nucleolin-related protein NRP (NRP) [Rattus norvegicus]                                                      | 25.7 | 11.5 |
| AI180288 | Caldesmon 1                                                                                                                                                                                      | 8    | 7.6  |
| AI180350 | CTD-binding SR-like protein rA9                                                                                                                                                                  | 33.7 | 22.3 |
| AI180396 | Retinoblastoma-related gene                                                                                                                                                                      | 6.3  | 7    |
| AI180410 | prolactin-like protein C 1                                                                                                                                                                       | 22   | 16.4 |
| AI180410 | prolactin-like protein C 1                                                                                                                                                                       | 6.9  | 8.7  |
| AI180410 | prolactin-like protein C 1                                                                                                                                                                       | 6.7  | 4    |
| AI180442 | farensyl diphosphate synthase                                                                                                                                                                    | 3.3  | 1.5  |
| AI227608 | microtubule-associated protein tau                                                                                                                                                               | 3.6  | 1.9  |
| AI227887 | cell division cycle 42 homolog (S. cerevisiae)                                                                                                                                                   | 19   | 20.9 |
| AI227936 | vesicular transport protein rvps45                                                                                                                                                               | 47.3 | 27.8 |
| AI228025 | calcitonin receptor-like                                                                                                                                                                         | 4.8  | 2.3  |
| AI228110 | UDP-glucuronosyltransferase 8                                                                                                                                                                    | 30.5 | 19.8 |
| AI228407 | adenylate cyclase activating polypeptide 1                                                                                                                                                       | 10.2 | 6.1  |
| AI228548 | Transcribed sequence with strong similarity to protein sp:P35467 (R.norvegicus) S10A_RAT S-100 protein, alpha chain                                                                              | 9.7  | 6.2  |
| AI228548 | Transcribed sequence with strong similarity to protein sp:P35467 (R.norvegicus) S10A_RAT S-100 protein, alpha chain                                                                              | 5.1  | 2    |
| AI228599 | topoisomerase (DNA) 2 alpha                                                                                                                                                                      | 28   | 16   |
| AI228669 | GABA transporter protein                                                                                                                                                                         | 9.1  | 9.9  |
| AI228675 | MAD homolog 2 (Drosophila)                                                                                                                                                                       | 15.2 | 11   |
| AI228850 | microtubule-associated protein 2                                                                                                                                                                 | 15.8 | 10.7 |
| AI229031 | calcium channel, voltage-dependent, alpha 1A subunit                                                                                                                                             | 62.9 | 46.1 |
| AI229237 | opioid receptor-like                                                                                                                                                                             | 3    | 1.2  |
| AI229407 | Tyrosine 3-monooxygenase/tryptophan 5-monooxygenase activation protein, theta polypeptide                                                                                                        | 81.2 | 24.5 |

|          |                                                                                                                                                                                                  |       |       |
|----------|--------------------------------------------------------------------------------------------------------------------------------------------------------------------------------------------------|-------|-------|
| AI229421 | Transcribed sequence with moderate similarity to protein sp:P49138 (M.musculus) MKK2_MOUSE MAP kinase-activated protein kinase 2 (MAPK-activated protein kinase 2) (MAPKAP kinase 2) (MAPKAPK-2) | 29.4  | 26    |
| AI229637 | MYB binding protein 1a                                                                                                                                                                           | 9.5   | 5.6   |
| AI229655 | Transcribed sequences                                                                                                                                                                            | 14.7  | 7.8   |
| AI230130 | ectonucleoside triphosphate diphosphohydrolase 2                                                                                                                                                 | 11.9  | 3.2   |
| AI230130 | ectonucleoside triphosphate diphosphohydrolase 2                                                                                                                                                 | 10.4  | 13.1  |
| AI230211 | potassium voltage gated channel, Shal-related family, member 3                                                                                                                                   | 3.3   | 1.2   |
| AI230255 | cytochrome P450, subfamily 51                                                                                                                                                                    | 6.3   | 3.3   |
| AI230260 | casein kinase II beta subunit                                                                                                                                                                    | 39.2  | 19.9  |
| AI230294 | Transcribed sequences                                                                                                                                                                            | 78.1  | 21    |
| AI230354 | phosphatidate phosphohydrolase type 2a                                                                                                                                                           | 63.1  | 20.1  |
| AI230602 | Retinoblastoma-related gene                                                                                                                                                                      | 21    | 23.6  |
| AI230712 | Subtilisin - like endoprotease                                                                                                                                                                   | 43    | 21.2  |
| AI230771 | nucleoporin 155kD                                                                                                                                                                                | 21    | 24.6  |
| AI230771 | nucleoporin 155kD                                                                                                                                                                                | 3.8   | 1.7   |
| AI230778 | Transcribed sequence with strong similarity to protein ref:NP_033445.1 (M.musculus) protein-tyrosine sulfotransferase 2 [Mus musculus]                                                           | 52.7  | 13.4  |
| AI230789 | neogenin                                                                                                                                                                                         | 6.5   | 9.6   |
| AI230842 | Fos like antigen 2                                                                                                                                                                               | 11.3  | 4.1   |
| AI230914 | farnesyltransferase beta subunit                                                                                                                                                                 | 41.7  | 21.7  |
| AI231007 | sphingomyelin phosphodiesterase 3, neutral                                                                                                                                                       | 44.5  | 37.8  |
| AI231164 | splicing factor, arginine/serine-rich (transformer 2 Drosophila homolog) 10                                                                                                                      | 24.1  | 16.5  |
| AI231213 | kangai 1                                                                                                                                                                                         | 33    | 17.5  |
| AI231257 | cyclin D1                                                                                                                                                                                        | 25.5  | 9.2   |
| AI231354 | stress activated protein kinase alpha II                                                                                                                                                         | 13.4  | 13.7  |
| AI231354 | stress activated protein kinase alpha II                                                                                                                                                         | 5.9   | 8     |
| AI231445 | unr protein                                                                                                                                                                                      | 7.7   | 7.7   |
| AI231472 | collagen, type 1, alpha 1                                                                                                                                                                        | 27.3  | 19.8  |
| AI231500 | phosphoribosyl pyrophosphate synthetase-associated protein 2                                                                                                                                     | 15.8  | 9.8   |
| AI231519 | sialyltransferase 7c                                                                                                                                                                             | 39.2  | 27.9  |
| AI231547 | FK506 binding protein 4 (59 kDa)                                                                                                                                                                 | 30.6  | 19.4  |
| AI232078 | LanC (bacterial lantibiotic synthetase component C)-like 1                                                                                                                                       | 25.1  | 15.8  |
| AI232087 | hydroxyacid oxidase (glycolate oxidase) 3                                                                                                                                                        | 6.1   | 4.8   |
| AI232096 | solute carrier family 15, member 2                                                                                                                                                               | 29.6  | 29    |
| AI232194 | chimerin (chimaerin) 2                                                                                                                                                                           | 11.3  | 6.9   |
| AI232256 | cytochrome b5, outer mitochondrial membrane isoform                                                                                                                                              | 21.3  | 12.1  |
| AI232268 | low density lipoprotein receptor-related protein associated protein 1                                                                                                                            | 14.4  | 7.4   |
| AI232284 | RT1 class Ib gene                                                                                                                                                                                | 232.3 | 102.7 |
| AI232284 | RT1 class Ib gene                                                                                                                                                                                | 42.4  | 30.2  |
| AI232379 | Platelet-derived growth factor receptor alpha                                                                                                                                                    | 52.2  | 20.9  |
| AI232691 | lectin, galactose binding, soluble 8                                                                                                                                                             | 24    | 12.3  |
| AI233219 | endothelial cell-specific molecule 1                                                                                                                                                             | 10    | 4.9   |
| AI233225 | guanylate cyclase 1, soluble, beta 3                                                                                                                                                             | 20    | 10.8  |
| AI233261 | glutamate cysteine ligase, modifier subunit                                                                                                                                                      | 7.4   | 8     |
| AI233365 | Transcribed sequence with moderate similarity to protein ref:NP_079590.1 (M.musculus) RIKEN cDNA 0610006H08 [Mus musculus]                                                                       | 27.7  | 7.3   |
| AI233421 | diacylglycerol kinase, gamma                                                                                                                                                                     | 14    | 5.7   |
| AI233591 | solute carrier family 13, member 1                                                                                                                                                               | 2.9   | 1.2   |
| AI234060 | lysyl oxidase                                                                                                                                                                                    | 26.6  | 18    |
| AI234351 | Rat (clone RLV124) Ig productively rearranged lambda chain mRNA V-J region, partial cds                                                                                                          | 2.9   | 1.2   |
| AI234730 | platelet-activating factor acetylhydrolase beta subunit (PAF-AH beta)                                                                                                                            | 9.4   | 7.1   |
| AI234828 | Rattus norvegicus partial mRNA for immunoglobulin alpha heavy chain (partial), complete constant region                                                                                          | 26.5  | 12.4  |
| AI234828 | Rattus norvegicus partial mRNA for immunoglobulin alpha heavy chain (partial), complete constant region                                                                                          | 11    | 14.6  |
| AI234915 | growth and transformation-dependent protein                                                                                                                                                      | 6     | 2     |
| AI234939 | Transcribed sequence with strong similarity to protein ref:NP_076320.1 (M.musculus) RIKEN cDNA 1500035H01 [Mus musculus]                                                                         | 25.9  | 16.1  |
| AI234950 | acid phosphatase 2                                                                                                                                                                               | 64.6  | 21.5  |
| AI234969 | GATA-binding protein 4                                                                                                                                                                           | 23    | 22.1  |
| AI235100 | exocyst complex 84-kDa subunit                                                                                                                                                                   | 15.8  | 13.1  |
| AI235291 | casein kinase 1, alpha 1                                                                                                                                                                         | 13.4  | 7.8   |
| AI235344 | geranylgeranyltransferase type I (GGTase-I)                                                                                                                                                      | 8.8   | 3.9   |
| AI235492 | proline rich 2                                                                                                                                                                                   | 14.9  | 5.4   |
| AI235506 | RalA binding protein 1                                                                                                                                                                           | 3.6   | 2.2   |
| AI235576 | hydroxy-delta-5-steroid dehydrogenase, 3 beta- and steroid delta-isomerase 1                                                                                                                     | 4.2   | 3.3   |
| AI235631 | Transcribed sequence with strong similarity to protein ref:NP_114131.1 (H.sapiens) transmembrane protein induced by tumor necrosis factor alpha [Homo sapiens]                                   | 3.6   | 2.3   |
| AI235707 | dynactin 4                                                                                                                                                                                       | 34.9  | 26.8  |
| AI235747 | glutathione S-transferase, alpha 1                                                                                                                                                               | 46    | 21.1  |
| AI235758 | protein kinase, cAMP dependent regulatory, type II beta                                                                                                                                          | 2.8   | 1.8   |
| AI235978 | nuclear receptor subfamily 3, group C, member 2                                                                                                                                                  | 33.6  | 25    |
| AI236130 | spinophilin                                                                                                                                                                                      | 91.9  | 36.9  |
| AI236145 | hydroxysteroid dehydrogenase 17 beta, type 7                                                                                                                                                     | 9     | 6.6   |
| AI236158 | small inducible cytokine subfamily C, member 1 (lymphotactin)                                                                                                                                    | 7.7   | 4.3   |
| AI236300 | CCAAT/enhancer binding protein, alpha                                                                                                                                                            | 42.9  | 49.5  |
| AI236484 | Rattus norvegicus mRNA for hnRNP protein, partial                                                                                                                                                | 39.9  | 26.2  |

|          |                                                                                                                                                                                                                           |      |      |
|----------|---------------------------------------------------------------------------------------------------------------------------------------------------------------------------------------------------------------------------|------|------|
| AI236597 | Transcribed sequence with weak similarity to protein pir:JC7185 (H.sapiens) JC7185 chromosome 1 C1orf9 protein - human                                                                                                    | 13.2 | 8.1  |
| AI236601 | Transcribed sequence with strong similarity to protein sp:Q61699 (M.musculus) H105_MOUSE Heat-shock protein 105 kDa (Heat shock-related 100 kDa protein E7I) (HSP-E7I) (Heat shock 110 kDa protein) (42 degrees C-HSP)    | 18.2 | 12.9 |
| AI236721 | tyrosine 3-monooxygenase/tryptophan 5-monooxygenase activation protein, gamma polypeptide                                                                                                                                 | 27.1 | 20.2 |
| AI236945 | Luteinizing hormone/choriogonadotropin receptor                                                                                                                                                                           | 4.6  | 2.3  |
| AI237007 | Transcribed sequence with strong similarity to protein pir:S41115 (H.sapiens) S41115 probable flavoprotein-ubiquinone oxidoreductase (EC 1.6.5.-) - human                                                                 | 11.7 | 11.8 |
| AI237258 | MYB binding protein 1a                                                                                                                                                                                                    | 18.3 | 10.9 |
| AI237576 | SPA-1 like protein p1294                                                                                                                                                                                                  | 19.4 | 11.3 |
| AI237756 | Transcribed sequence with strong similarity to protein sp:P35249 (H.sapiens) AC12_HUMAN Activator 1 37 kDa subunit (Replication factor C 37 kDa subunit) (A1 37 kDa subunit) (RF-C 37 kDa subunit) (RFC37)                | 20.8 | 5.7  |
| AI237825 | carboxypeptidase B1                                                                                                                                                                                                       | 5.8  | 3.3  |
| AI237884 | alpha-fetoprotein                                                                                                                                                                                                         | 1.9  | 1.1  |
| AI638939 | Transcribed sequence with moderate similarity to protein ref:NP_081720.1 (M.musculus) HMG-BOX transcription factor BBX [Mus musculus]                                                                                     | 18   | 10.4 |
| AI638940 | Transcribed sequences                                                                                                                                                                                                     | 3.3  | 2    |
| AI638941 | Transcribed sequences                                                                                                                                                                                                     | 2.2  | 0.6  |
| AI638942 | Transcribed sequence                                                                                                                                                                                                      | 22.3 | 11.2 |
| AI638943 | Transcribed sequence with moderate similarity to protein sp:P18761 (M.musculus) CAH6_MOUSE Carbonic anhydrase VI precursor (Carbonate dehydratase VI) (CA-VI) (Secreted carbonic anhydrase) (Salivary carbonic anhydrase) | 19.9 | 12.9 |
| AI638944 | Transcribed sequences                                                                                                                                                                                                     | 5.7  | 6.1  |
| AI638945 | Transcribed sequences                                                                                                                                                                                                     | 9    | 10.5 |
| AI638947 | Transcribed sequences                                                                                                                                                                                                     | 6.5  | 7.6  |
| AI638948 | Transcribed sequences                                                                                                                                                                                                     | 78.1 | 25.2 |
| AI638949 | Transcribed sequence with strong similarity to protein ref:NP_076424.1 (H.sapiens) chromosome 20 open reading frame 116 [Homo sapiens]                                                                                    | 47   | 23.8 |
| AI638951 | Transcribed sequences                                                                                                                                                                                                     | 8.7  | 10.1 |
| AI638952 | Transcribed sequences                                                                                                                                                                                                     | 10.3 | 9.8  |
| AI638953 | Transcribed sequences                                                                                                                                                                                                     | 4    | 4    |
| AI638954 | Transcribed sequences                                                                                                                                                                                                     | 7.1  | 9.3  |
| AI638955 | Transcribed sequences                                                                                                                                                                                                     | 2.7  | 1.9  |
| AI638956 | Transcribed sequences                                                                                                                                                                                                     | 3.6  | 4.9  |
| AI638957 | Transcribed sequences                                                                                                                                                                                                     | 16   | 13.2 |
| AI638958 | Transcribed sequences                                                                                                                                                                                                     | 2.3  | 1.2  |
| AI638959 | Transcribed sequences                                                                                                                                                                                                     | 1.5  | 0.8  |
| AI638960 | Transcribed sequences                                                                                                                                                                                                     | 3.3  | 4.2  |
| AI638962 | Transcribed sequence                                                                                                                                                                                                      | 14.6 | 13.6 |
| AI638965 | Transcribed sequences                                                                                                                                                                                                     | 12.3 | 12.2 |
| AI638966 | Transcribed sequences                                                                                                                                                                                                     | 33.7 | 6.1  |
| AI638967 | Transcribed sequences                                                                                                                                                                                                     | 11.6 | 4.9  |
| AI638968 | Transcribed sequences                                                                                                                                                                                                     | 10.2 | 6.6  |
| AI638969 | Transcribed sequences                                                                                                                                                                                                     | 5.2  | 4.2  |
| AI638970 | Transcribed sequence with weak similarity to protein sp:P53817 (R.norvegicus) R107_RAT H-rev 107 protein                                                                                                                  | 9.5  | 10.2 |
| AI638971 | Transcribed sequences                                                                                                                                                                                                     | 22   | 15.8 |
| AI638972 | Transcribed sequences                                                                                                                                                                                                     | 33.3 | 14.1 |
| AI638973 | Transcribed sequence                                                                                                                                                                                                      | 11.9 | 10.4 |
| AI638974 | Transcribed sequences                                                                                                                                                                                                     | 15.4 | 20.7 |
| AI638976 | Transcribed sequence                                                                                                                                                                                                      | 14   | 14.3 |
| AI638977 | Transcribed sequences                                                                                                                                                                                                     | 14.5 | 14.6 |
| AI638980 | solute carrier family 1, member 2                                                                                                                                                                                         | 32.4 | 27   |
| AI638982 | sulfotransferase family, cytosolic, 1C, member 2                                                                                                                                                                          | 4.4  | 5    |
| AI638983 | Transcribed sequence                                                                                                                                                                                                      | 7.5  | 2.6  |
| AI638985 | Transcribed sequences                                                                                                                                                                                                     | 5.5  | 5.7  |
| AI638986 | Transcribed sequences                                                                                                                                                                                                     | 8.9  | 9    |
| AI638987 | Transcribed sequences                                                                                                                                                                                                     | 38.2 | 20.1 |
| AI638989 | Transcribed sequence with moderate similarity to protein pir:T14273 (M.musculus) T14273 zinc finger protein 106 - mouse                                                                                                   | 22.2 | 13.8 |
| AI638990 | Transcribed sequences                                                                                                                                                                                                     | 12.3 | 6    |
| AI638991 | Transcribed sequences                                                                                                                                                                                                     | 18.9 | 11.7 |
| AI638992 | Transcribed sequences                                                                                                                                                                                                     | 10.1 | 6    |
| AI638993 | Transcribed sequence with moderate similarity to protein pir:I60307 (E. coli) I60307 beta-galactosidase, alpha peptide - Escherichia coli                                                                                 | 35.6 | 15.9 |
| AI638995 | Transcribed sequences                                                                                                                                                                                                     | 22.6 | 15   |
| AI638996 | Transcribed sequences                                                                                                                                                                                                     | 3.5  | 2.5  |
| AI638997 | Transcribed sequences                                                                                                                                                                                                     | 1.5  | 0.7  |
| AI638998 | Transcribed sequences                                                                                                                                                                                                     | 11.2 | 8.2  |
| AI638999 | Transcribed sequences                                                                                                                                                                                                     | 9    | 3.5  |
| AI639000 | Transcribed sequences                                                                                                                                                                                                     | 13.3 | 10.2 |
| AI639001 | Transcribed sequences                                                                                                                                                                                                     | 16.1 | 10   |
| AI639002 | Transcribed sequences                                                                                                                                                                                                     | 57.7 | 20.9 |
| AI639004 | Transcribed sequences                                                                                                                                                                                                     | 32.3 | 15.3 |
| AI639007 | Transcribed sequences                                                                                                                                                                                                     | 10.5 | 7.9  |
| AI639009 | Transcribed sequences                                                                                                                                                                                                     | 3.4  | 1.7  |
| AI639010 | Transcribed sequences                                                                                                                                                                                                     | 7.5  | 10   |

|          |                                                                                                                                                                                                                                            |      |      |
|----------|--------------------------------------------------------------------------------------------------------------------------------------------------------------------------------------------------------------------------------------------|------|------|
| AI639011 | Transcribed sequences                                                                                                                                                                                                                      | 6.6  | 9    |
| AI639013 | Transcribed sequences                                                                                                                                                                                                                      | 19.1 | 19.4 |
| AI639014 | Transcribed sequence with moderate similarity to protein ref:NP_079742.1 (M.musculus) RIKEN cDNA 2200002K21 [Mus musculus]                                                                                                                 | 15.9 | 9.3  |
| AI639015 | Transcribed sequences                                                                                                                                                                                                                      | 5.8  | 8.2  |
| AI639016 | Transcribed sequences                                                                                                                                                                                                                      | 3    | 1.5  |
| AI639018 | Transcribed sequence                                                                                                                                                                                                                       | 25.4 | 24.2 |
| AI639019 | Transcribed sequence                                                                                                                                                                                                                       | 8.1  | 4.9  |
| AI639020 | ATP synthase, H <sup>+</sup> transporting, mitochondrial F1 complex, O subunit (oligomycin sensitivity conferring protein)                                                                                                                 | 13   | 8.9  |
| AI639021 | Transcribed sequences                                                                                                                                                                                                                      | 2.6  | 1.4  |
| AI639022 | Transcribed sequences                                                                                                                                                                                                                      | 12.3 | 9.3  |
| AI639023 | potassium voltage gated channel, Shaw-related subfamily, member 3                                                                                                                                                                          | 15   | 9.9  |
| AI639024 | Transcribed sequence                                                                                                                                                                                                                       | 5.9  | 3.7  |
| AI639026 | Transcribed sequences                                                                                                                                                                                                                      | 18.2 | 18   |
| AI639027 | Transcribed sequence with weak similarity to protein sp:P31151 (H.sapiens) S107_HUMAN S100 calcium-binding protein A7 (Psoriasin)                                                                                                          | 54.3 | 25.7 |
| AI639028 | Transcribed sequences                                                                                                                                                                                                                      | 33.5 | 16   |
| AI639029 | Transcribed sequences                                                                                                                                                                                                                      | 25.3 | 16.1 |
| AI639030 | Transcribed sequence                                                                                                                                                                                                                       | 34.2 | 19.1 |
| AI639032 | Transcribed sequences                                                                                                                                                                                                                      | 16   | 15.4 |
| AI639033 | Transcribed sequences                                                                                                                                                                                                                      | 4.8  | 5.1  |
| AI639034 | Transcribed sequences                                                                                                                                                                                                                      | 5.4  | 1.7  |
| AI639035 | Transcribed sequences                                                                                                                                                                                                                      | 7.4  | 5.4  |
| AI639036 | Transcribed sequences                                                                                                                                                                                                                      | 9.4  | 4    |
| AI639036 | Transcribed sequences                                                                                                                                                                                                                      | 9.1  | 10.7 |
| AI639036 | Transcribed sequences                                                                                                                                                                                                                      | 6.4  | 6.5  |
| AI639037 | Transcribed sequences                                                                                                                                                                                                                      | 3.2  | 2.4  |
| AI639038 | Transcribed sequences                                                                                                                                                                                                                      | 4.8  | 3.9  |
| AI639039 | Transcribed sequence with weak similarity to protein sp:Q09167 (R.norvegicus) SFR5_RAT Splicing factor, arginine/serine-rich 5 (Pre-mRNA splicing factor SRP40) (Insulin-induced growth response protein CL-4) (Delayed-early protein HRS) | 12.5 | 8.7  |
| AI639041 | Transcribed sequences                                                                                                                                                                                                                      | 9.5  | 7.1  |
| AI639042 | Transcribed sequences                                                                                                                                                                                                                      | 18   | 3.9  |
| AI639043 | Transcribed sequences                                                                                                                                                                                                                      | 17   | 12.6 |
| AI639044 | Transcribed sequence with weak similarity to protein sp:P28648 (R.norvegicus) CD63_RAT CD63 antigen (AD1 antigen)                                                                                                                          | 49.1 | 20.8 |
| AI639047 | Transcribed sequences                                                                                                                                                                                                                      | 2.8  | 2.3  |
| AI639048 | Transcribed sequence with strong similarity to protein pir:T00057 (H.sapiens) T00057 hypothetical protein KIAA0423 - human (fragment)                                                                                                      | 13.6 | 7.9  |
| AI639049 | solute carrier family 12, member 4                                                                                                                                                                                                         | 9.4  | 4.1  |
| AI639050 | Transcribed sequence with weak similarity to protein ref:NP_445972.1 (R.norvegicus) E74-like factor 1 (ets domain transcription factor) [Rattus norvegicus]                                                                                | 9.2  | 7    |
| AI639051 | Transcribed sequence                                                                                                                                                                                                                       | 2.7  | 0.6  |
| AI639052 | tropomyosin 1, alpha                                                                                                                                                                                                                       | 10.1 | 8    |
| AI639054 | Transcribed sequence with weak similarity to protein pir:JG0168 (M.musculus) JG0168 gob-5 protein - mouse                                                                                                                                  | 3.2  | 2.6  |
| AI639055 | Transcribed sequence                                                                                                                                                                                                                       | 8.5  | 9.2  |
| AI639056 | Transcribed sequences                                                                                                                                                                                                                      | 3    | 3.9  |
| AI639057 | Transcribed sequences                                                                                                                                                                                                                      | 5.5  | 6.7  |
| AI639060 | Transcribed sequence with weak similarity to protein ref:NP_060351.1 (H.sapiens) hypothetical protein FLJ20559 [Homo sapiens]                                                                                                              | 1.5  | 0.3  |
| AI639061 | Transcribed sequences                                                                                                                                                                                                                      | 4.9  | 5.5  |
| AI639062 | Transcribed sequences                                                                                                                                                                                                                      | 6.7  | 4.8  |
| AI639063 | Transcribed sequence                                                                                                                                                                                                                       | 4.2  | 3.9  |
| AI639064 | Transcribed sequence                                                                                                                                                                                                                       | 23.8 | 26.7 |
| AI639065 | Transcribed sequences                                                                                                                                                                                                                      | 5    | 4.7  |
| AI639067 | Transcribed sequences                                                                                                                                                                                                                      | 33.7 | 20.9 |
| AI639068 | Transcribed sequences                                                                                                                                                                                                                      | 1.7  | 0.4  |
| AI639069 | Transcribed sequences                                                                                                                                                                                                                      | 45.1 | 22   |
| AI639070 | Transcribed sequences                                                                                                                                                                                                                      | 4.6  | 3    |
| AI639071 | Transcribed sequences                                                                                                                                                                                                                      | 5.7  | 6.1  |
| AI639072 | Transcribed sequences                                                                                                                                                                                                                      | 7.1  | 7.7  |
| AI639073 | Transcribed sequences                                                                                                                                                                                                                      | 3.9  | 4.8  |
| AI639074 | Transcribed sequence with weak similarity to protein sp:P11369 (M.musculus) POL2_MOUSE Retrovirus-related POL polyprotein [Contains: Reverse transcriptase ; Endonuclease]                                                                 | 13.3 | 16.3 |
| AI639076 | Transcribed sequences                                                                                                                                                                                                                      | 5    | 8.4  |
| AI639076 | Transcribed sequences                                                                                                                                                                                                                      | 3.8  | 7    |
| AI639077 | Transcribed sequences                                                                                                                                                                                                                      | 7.8  | 7.5  |
| AI639078 | Transcribed sequences                                                                                                                                                                                                                      | 5.3  | 2.8  |
| AI639080 | Transcribed sequences                                                                                                                                                                                                                      | 8    | 10.6 |
| AI639082 | mini chromosome maintenance deficient 6 (S. cerevisiae)                                                                                                                                                                                    | 35.8 | 11.7 |
| AI639083 | Transcribed sequences                                                                                                                                                                                                                      | 2.3  | 2.2  |
| AI639084 | Transcribed sequences                                                                                                                                                                                                                      | 2.7  | 1.3  |
| AI639085 | Transcribed sequence with moderate similarity to protein ref:NP_445775.1 (R.norvegicus) degenerative spermatocyte homolog (Drosophila) [Rattus norvegicus]                                                                                 | 2.3  | 1.4  |
| AI639088 | Transcribed sequences                                                                                                                                                                                                                      | 6.3  | 3.8  |
| AI639089 | Transcribed sequence with weak similarity to protein sp:Q62716 (R.norvegicus) DEF1_RAT Neutrophil antibiotic peptide NP-1 precursor (Neutrophil defensin 1) (RatNP-1)                                                                      | 21.1 | 12.4 |

|          |                                                                                                                                                                       |      |      |
|----------|-----------------------------------------------------------------------------------------------------------------------------------------------------------------------|------|------|
| AI639090 | Transcribed sequences                                                                                                                                                 | 9.3  | 8.8  |
| AI639091 | Transcribed sequences                                                                                                                                                 | 8.8  | 7    |
| AI639092 | Transcribed sequences                                                                                                                                                 | 7.8  | 10.8 |
| AI639094 | Transcribed sequences                                                                                                                                                 | 13.9 | 8.9  |
| AI639096 | Transcribed sequence with weak similarity to protein ref:NP_114001.1 (R.norvegicus) norvegicus myosin binding protein H [Rattus norvegicus]                           | 13.3 | 12.6 |
| AI639098 | Transcribed sequence                                                                                                                                                  | 1.5  | 0.3  |
| AI639100 | Transcribed sequences                                                                                                                                                 | 5.7  | 3.2  |
| AI639101 | Transcribed sequences                                                                                                                                                 | 28.7 | 27.6 |
| AI639102 | Transcribed sequences                                                                                                                                                 | 31.5 | 27.4 |
| AI639102 | Transcribed sequences                                                                                                                                                 | 7    | 6.8  |
| AI639105 | Transcribed sequence with strong similarity to protein sp:Q99P75 (R.norvegicus) RAB9_RAT Ras-related protein Rab-9                                                    | 8.3  | 4    |
| AI639106 | Transcribed sequences                                                                                                                                                 | 13.3 | 8.1  |
| AI639108 | Transcribed sequences                                                                                                                                                 | 34.6 | 24.1 |
| AI639109 | Transcribed sequence                                                                                                                                                  | 2.9  | 4.3  |
| AI639111 | Transcribed sequences                                                                                                                                                 | 4.5  | 4.7  |
| AI639112 | Transcribed sequences                                                                                                                                                 | 14.7 | 12   |
| AI639114 | Transcribed sequences                                                                                                                                                 | 11.2 | 8    |
| AI639115 | Transcribed sequences                                                                                                                                                 | 4.4  | 1.8  |
| AI639117 | Transcribed sequence with strong similarity to protein sp:P04186 (M.musculus) CFAB_MOUSE Complement factor B precursor (C3/C5 convertase)                             | 12.3 | 11.5 |
| AI639118 | Transcribed sequence with moderate similarity to protein pir:I84505 (R.norvegicus) I84505 calcium-dependent actin-binding protein - rat                               | 2.3  | 1.9  |
| AI639119 | Transcribed sequences                                                                                                                                                 | 11.6 | 8.1  |
| AI639120 | Transcribed sequences                                                                                                                                                 | 85.9 | 25.6 |
| AI639120 | Transcribed sequences                                                                                                                                                 | 9.5  | 3.8  |
| AI639121 | Transcribed sequences                                                                                                                                                 | 10.5 | 8.3  |
| AI639123 | Transcribed sequences                                                                                                                                                 | 4    | 1.9  |
| AI639125 | Transcribed sequences                                                                                                                                                 | 27   | 14.6 |
| AI639126 | Transcribed sequence                                                                                                                                                  | 5.1  | 2.7  |
| AI639127 | Transcribed sequence with strong similarity to protein ref:NP_473361.1 (H.sapiens) putative ion channel protein CATSPER2 [Homo sapiens]                               | 12.6 | 6    |
| AI639128 | Transcribed sequences                                                                                                                                                 | 28.3 | 27.3 |
| AI639129 | Transcribed sequences                                                                                                                                                 | 2.8  | 1.3  |
| AI639130 | Transcribed sequences                                                                                                                                                 | 23.9 | 18   |
| AI639132 | Transcribed sequences                                                                                                                                                 | 11.2 | 11.2 |
| AI639134 | Transcribed sequences                                                                                                                                                 | 12.2 | 6.8  |
| AI639136 | Transcribed sequences                                                                                                                                                 | 16.5 | 9.7  |
| AI639137 | Transcribed sequence                                                                                                                                                  | 30.7 | 25.1 |
| AI639138 | Transcribed sequences                                                                                                                                                 | 48.1 | 28.1 |
| AI639139 | Transcribed sequences                                                                                                                                                 | 35.8 | 10.2 |
| AI639139 | Transcribed sequences                                                                                                                                                 | 1.7  | 0.7  |
| AI639140 | Transcribed sequence                                                                                                                                                  | 21.9 | 17.4 |
| AI639141 | Transcribed sequences                                                                                                                                                 | 30.2 | 21.9 |
| AI639142 | Transcribed sequences                                                                                                                                                 | 15.6 | 10.2 |
| AI639143 | Transcribed sequences                                                                                                                                                 | 9    | 10.8 |
| AI639144 | Transcribed sequences                                                                                                                                                 | 10.4 | 5.9  |
| AI639145 | Transcribed sequence                                                                                                                                                  | 31.1 | 13   |
| AI639146 | Transcribed sequences                                                                                                                                                 | 5.7  | 3.7  |
| AI639147 | Transcribed sequence                                                                                                                                                  | 5    | 3.2  |
| AI639148 | Transcribed sequence with moderate similarity to protein ref:NP_061914.1 (H.sapiens) similar to prokaryotic-type class I peptide chain release factors [Homo sapiens] | 4.2  | 3.4  |
| AI639150 | Transcribed sequences                                                                                                                                                 | 9.5  | 6.2  |
| AI639151 | Transcribed sequence with weak similarity to protein ref:NP_446114.1 (R.norvegicus) cyclin L [Rattus norvegicus]                                                      | 11.2 | 9.3  |
| AI639152 | Transcribed sequences                                                                                                                                                 | 10.8 | 6.3  |
| AI639153 | sperm protein 10                                                                                                                                                      | 26.2 | 16.1 |
| AI639155 | Transcribed sequences                                                                                                                                                 | 3.5  | 3.4  |
| AI639157 | ribosomal protein L13                                                                                                                                                 | 45.6 | 42   |
| AI639158 | Transcribed sequence with weak similarity to protein pir:S51669 (S. cerevisiae) S51669 GCD10 protein - yeast (Saccharomyces cerevisiae)                               | 21.6 | 18.1 |
| AI639159 | Transcribed sequence                                                                                                                                                  | 30.3 | 16.7 |
| AI639160 | Transcribed sequences                                                                                                                                                 | 2.9  | 1.8  |
| AI639161 | Transcribed sequences                                                                                                                                                 | 6.8  | 10.8 |
| AI639162 | Transcribed sequences                                                                                                                                                 | 16.2 | 10   |
| AI639163 | Transcribed sequences                                                                                                                                                 | 8.7  | 9.3  |
| AI639164 | Transcribed sequences                                                                                                                                                 | 13.8 | 13.9 |
| AI639165 | Transcribed sequence with strong similarity to protein ref:NP_078935.1 (H.sapiens) hypothetical protein FLJ11753 [Homo sapiens]                                       | 10.2 | 7.3  |
| AI639166 | Transcribed sequences                                                                                                                                                 | 13.6 | 7.8  |
| AI639167 | Transcribed sequences                                                                                                                                                 | 13.4 | 8.4  |
| AI639168 | Transcribed sequence with weak similarity to protein ref:NP_443120.1 (H.sapiens) KIAA0563-related gene [Homo sapiens]                                                 | 20.2 | 12.6 |
| AI639169 | Transcribed sequences                                                                                                                                                 | 17.9 | 8.5  |
| AI639170 | Transcribed sequences                                                                                                                                                 | 9.5  | 6.4  |
| AI639171 | Transcribed sequences                                                                                                                                                 | 4    | 4    |
| AI639172 | Transcribed sequences                                                                                                                                                 | 9.4  | 5.3  |
| AI639174 | phospholipase B                                                                                                                                                       | 5.9  | 3.2  |

|          |                                                                                                                                                                                        |       |      |
|----------|----------------------------------------------------------------------------------------------------------------------------------------------------------------------------------------|-------|------|
| AI639175 | Transcribed sequence                                                                                                                                                                   | 4.2   | 4.9  |
| AI639177 | Transcribed sequences                                                                                                                                                                  | 1.2   | 0.4  |
| AI639178 | Transcribed sequences                                                                                                                                                                  | 10.4  | 8.6  |
| AI639179 | Transcribed sequences                                                                                                                                                                  | 16.9  | 12.2 |
| AI639181 | Transcribed sequences                                                                                                                                                                  | 25    | 6.1  |
| AI639182 | Transcribed sequence                                                                                                                                                                   | 2.3   | 1.7  |
| AI639183 | Transcribed sequence                                                                                                                                                                   | 5.2   | 6.3  |
| AI639184 | Transcribed sequence                                                                                                                                                                   | 15.5  | 10.8 |
| AI639185 | Transcribed sequences                                                                                                                                                                  | 28.4  | 16.6 |
| AI639186 | Transcribed sequence                                                                                                                                                                   | 4.4   | 2    |
| AI639187 | Transcribed sequence with weak similarity to protein ref:NP_493466.1 (C.elegans) Y63D3A.8.p [Caenorhabditis elegans]                                                                   | 3.4   | 4.1  |
| AI639188 | Transcribed sequence with strong similarity to protein sp:O70133 (M.musculus) DDX9_MOUSE ATP-dependent RNA helicase A (Nuclear DNA helicase II) (NDH II) (DEAD-box protein 9) (mHEL-5) | 9.3   | 6.7  |
| AI639189 | Transcribed sequences                                                                                                                                                                  | 4.7   | 4.3  |
| AI639190 | Transcribed sequences                                                                                                                                                                  | 13    | 5    |
| AI639191 | Transcribed sequences                                                                                                                                                                  | 12.7  | 12.3 |
| AI639192 | Transcribed sequences                                                                                                                                                                  | 12.1  | 10.3 |
| AI639194 | Transcribed sequence                                                                                                                                                                   | 4.5   | 2    |
| AI639195 | Transcribed sequences                                                                                                                                                                  | 27.6  | 34.5 |
| AI639196 | collybistin I                                                                                                                                                                          | 16.3  | 14   |
| AI639197 | Transcribed sequences                                                                                                                                                                  | 16.2  | 10.7 |
| AI639198 | Transcribed sequence                                                                                                                                                                   | 8.5   | 7.1  |
| AI639199 | Transcribed sequence with weak similarity to protein ref:NP_150279.1 (H.sapiens) brother of CDO [Homo sapiens]                                                                         | 9.2   | 6    |
| AI639200 | Transcribed sequences                                                                                                                                                                  | 14.5  | 12.4 |
| AI639201 | Transcribed sequences                                                                                                                                                                  | 9.4   | 7.6  |
| AI639202 | Transcribed sequences                                                                                                                                                                  | 2.9   | 1.8  |
| AI639204 | Transcribed sequences                                                                                                                                                                  | 8.7   | 8.2  |
| AI639205 | Transcribed sequences                                                                                                                                                                  | 5.7   | 5    |
| AI639206 | Transcribed sequences                                                                                                                                                                  | 15.7  | 13.8 |
| AI639209 | Transcribed sequences                                                                                                                                                                  | 32.2  | 19.7 |
| AI639210 | Transcribed sequence                                                                                                                                                                   | 6.4   | 3.2  |
| AI639212 | Transcribed sequences                                                                                                                                                                  | 16.1  | 13.4 |
| AI639213 | Transcribed sequence                                                                                                                                                                   | 4.1   | 5.2  |
| AI639214 | Transcribed sequence                                                                                                                                                                   | 12    | 4.2  |
| AI639215 | Transcribed sequences                                                                                                                                                                  | 21.9  | 10.6 |
| AI639216 | Transcribed sequences                                                                                                                                                                  | 12    | 8.9  |
| AI639217 | Transcribed sequences                                                                                                                                                                  | 10.1  | 10.7 |
| AI639219 | Transcribed sequences                                                                                                                                                                  | 28.5  | 12.3 |
| AI639220 | Transcribed sequences                                                                                                                                                                  | 2.1   | 0.4  |
| AI639221 | Transcribed sequences                                                                                                                                                                  | 2.8   | 3.9  |
| AI639222 | Transcribed sequence                                                                                                                                                                   | 86.2  | 70.1 |
| AI639224 | ribosomal protein S13                                                                                                                                                                  | 7.5   | 9.2  |
| AI639225 | Transcribed sequences                                                                                                                                                                  | 15.4  | 9.7  |
| AI639226 | Transcribed sequences                                                                                                                                                                  | 9.7   | 7.7  |
| AI639227 | Transcribed sequence with moderate similarity to protein ref:NP_068569.1 (H.sapiens) eosinophil chemotactic cytokine [Homo sapiens]                                                    | 3     | 1.7  |
| AI639228 | Transcribed sequence with weak similarity to protein ref:NP_067728.1 (R.norvegicus) plasminogen activator inhibitor 2 type A [Rattus norvegicus]                                       | 17.6  | 8    |
| AI639231 | Transcribed sequence with strong similarity to protein pir:T46480 (H.sapiens) T46480 hypothetical protein DKFZp434L1850.1 - human (fragment)                                           | 18.8  | 17.5 |
| AI639232 | Transcribed sequences                                                                                                                                                                  | 9.1   | 3.9  |
| AI639233 | decorin                                                                                                                                                                                | 8.5   | 4.2  |
| AI639234 | Neonatal submandibular gland protein B                                                                                                                                                 | 3.4   | 1.2  |
| AI639237 | Transcribed sequence with weak similarity to protein ref:NP_498392.1 (C.elegans) C16A3.8.p [Caenorhabditis elegans]                                                                    | 4.6   | 5.3  |
| AI639238 | Transcribed sequences                                                                                                                                                                  | 17.7  | 12.2 |
| AI639239 | Transcribed sequences                                                                                                                                                                  | 23.6  | 11.1 |
| AI639241 | Transcribed sequence with weak similarity to protein pir:I58376 (M.musculus) I58376 hypothetical protein uniprot - mouse                                                               | 20.7  | 19.2 |
| AI639242 | Transcribed sequence                                                                                                                                                                   | 4.4   | 6.5  |
| AI639243 | ---                                                                                                                                                                                    | 4.1   | 2.6  |
| AI639244 | Transcribed sequence                                                                                                                                                                   | 3     | 2.2  |
| AI639246 | Transcribed sequences                                                                                                                                                                  | 9.7   | 6.3  |
| AI639247 | Transcribed sequence with moderate similarity to protein pir:T17296 (H.sapiens) T17296 hypothetical protein DKFZp434I092.1 - human (fragment)                                          | 38    | 10.2 |
| AI639248 | Transcribed sequences                                                                                                                                                                  | 28.8  | 7.3  |
| AI639248 | Transcribed sequences                                                                                                                                                                  | 0.9   | 0.2  |
| AI639248 | Transcribed sequences                                                                                                                                                                  | 0.9   | 0.5  |
| AI639249 | Transcribed sequences                                                                                                                                                                  | 60.1  | 53.6 |
| AI639250 | Transcribed sequences                                                                                                                                                                  | 8     | 10   |
| AI639251 | Transcribed sequences                                                                                                                                                                  | 11.4  | 9.4  |
| AI639252 | Transcribed sequence                                                                                                                                                                   | 14.4  | 12.9 |
| AI639253 | Transcribed sequences                                                                                                                                                                  | 14.1  | 9.9  |
| AI639254 | sperm adhesion molecule                                                                                                                                                                | 5.3   | 7.8  |
| AI639255 | Transcribed sequences                                                                                                                                                                  | 206.4 | 76.3 |
| AI639256 | Transcribed sequences                                                                                                                                                                  | 2.4   | 0.6  |
| AI639257 | Transcribed sequences                                                                                                                                                                  | 6.8   | 3.5  |



|          |                                                                                                                                                                                          |       |       |
|----------|------------------------------------------------------------------------------------------------------------------------------------------------------------------------------------------|-------|-------|
| AI639258 | Transcribed sequences                                                                                                                                                                    | 4.4   | 3.2   |
| AI639260 | Transcribed sequences                                                                                                                                                                    | 7.8   | 4.1   |
| AI639262 | Transcribed sequences                                                                                                                                                                    | 3.3   | 1.1   |
| AI639264 | Transcribed sequences                                                                                                                                                                    | 20.2  | 13.8  |
| AI639267 | Transcribed sequence with strong similarity to protein pir:A38383 (M.musculus) A38383 troponin C, fast skeletal muscle - mouse                                                           | 11.5  | 11.7  |
| AI639268 | Transcribed sequence with weak similarity to protein pir:T17307 (H.sapiens) T17307 hypothetical protein DKFZp566O084.1 - human                                                           | 12.5  | 7.2   |
| AI639269 | Transcribed sequence with moderate similarity to protein ref:NP_071875.1 (M.musculus) membrane-spanning 4-domains, subfamily A, member 8 [Mus musculus]                                  | 7.2   | 3.9   |
| AI639271 | Transcribed sequences                                                                                                                                                                    | 65.9  | 37.7  |
| AI639272 | Transcribed sequences                                                                                                                                                                    | 10.2  | 8.8   |
| AI639275 | Transcribed sequence with strong similarity to protein pir:S22933 (M.musculus) S22933 testis-specific protein Bs13 - mouse                                                               | 5.4   | 1.4   |
| AI639276 | Transcribed sequence                                                                                                                                                                     | 16.3  | 17    |
| AI639277 | Transcribed sequences                                                                                                                                                                    | 7.7   | 5.7   |
| AI639281 | Transcribed sequences                                                                                                                                                                    | 26.7  | 18    |
| AI639282 | polymerase II                                                                                                                                                                            | 25.5  | 24.1  |
| AI639283 | Transcribed sequences                                                                                                                                                                    | 4     | 2.7   |
| AI639284 | Transcribed sequence with strong similarity to protein sp:Q61765 (M.musculus) K1M1_MOUSE Keratin, type cuticular HA1 (Hair keratin, type I HA1) (HKA-1)                                  | 15.1  | 21.8  |
| AI639285 | Transcribed sequences                                                                                                                                                                    | 15.3  | 8.8   |
| AI639287 | Transcribed sequences                                                                                                                                                                    | 3.1   | 2.2   |
| AI639288 | Transcribed sequence with moderate similarity to protein pir:S14234 (M.musculus) S14234 hypothetical protein - mouse                                                                     | 2.1   | 1.8   |
| AI639289 | Transcribed sequences                                                                                                                                                                    | 3.4   | 4     |
| AI639290 | Transcribed sequences                                                                                                                                                                    | 1.5   | 0.7   |
| AI639291 | integrin alpha 8                                                                                                                                                                         | 28.1  | 14.6  |
| AI639292 | Transcribed sequence                                                                                                                                                                     | 6.5   | 5.3   |
| AI639293 | Transcribed sequences                                                                                                                                                                    | 19.4  | 9.3   |
| AI639294 | Transcribed sequence with weak similarity to protein sp:P10247 (R.norvegicus) HG2A_RAT H-2 class II histocompatibility antigen, gamma chain (HLA-DR antigens associated invariant chain) | 18.6  | 16.9  |
| AI639295 | Transcribed sequences                                                                                                                                                                    | 15.3  | 9.8   |
| AI639296 | Transcribed sequences                                                                                                                                                                    | 6.2   | 3.8   |
| AI639298 | Transcribed sequences                                                                                                                                                                    | 9.8   | 11.1  |
| AI639299 | Transcribed sequences                                                                                                                                                                    | 122.9 | 106.9 |
| AI639300 | Transcribed sequence with weak similarity to protein sp:P54370 (R.norvegicus) OAZ_RAT Ornithine decarboxylase antizyme (ODC-Az)                                                          | 56.6  | 36.7  |
| AI639302 | Transcribed sequence                                                                                                                                                                     | 1.6   | 0.5   |
| AI639303 | Transcribed sequences                                                                                                                                                                    | 6     | 4.1   |
| AI639305 | Transcribed sequences                                                                                                                                                                    | 19.1  | 10    |
| AI639305 | Transcribed sequences                                                                                                                                                                    | 13.8  | 11    |
| AI639306 | Transcribed sequences                                                                                                                                                                    | 34.9  | 24.6  |
| AI639307 | Transcribed sequence                                                                                                                                                                     | 14.9  | 20.3  |
| AI639308 | Transcribed sequences                                                                                                                                                                    | 14.4  | 6.9   |
| AI639309 | Transcribed sequences                                                                                                                                                                    | 13    | 12.1  |
| AI639310 | Transcribed sequence                                                                                                                                                                     | 20.1  | 10.1  |
| AI639311 | probasin                                                                                                                                                                                 | 4.9   | 4.1   |
| AI639312 | Transcribed sequences                                                                                                                                                                    | 7.7   | 5.8   |
| AI639313 | huntingtin-associated protein interacting protein (duo)                                                                                                                                  | 14.2  | 7.9   |
| AI639314 | Transcribed sequences                                                                                                                                                                    | 8.4   | 5.5   |
| AI639315 | Transcribed sequences                                                                                                                                                                    | 5.2   | 9     |
| AI639315 | Transcribed sequences                                                                                                                                                                    | 4.3   | 5.1   |
| AI639316 | Transcribed sequences                                                                                                                                                                    | 14.7  | 9.1   |
| AI639317 | Transcribed sequences                                                                                                                                                                    | 20.1  | 18.8  |
| AI639318 | ret proto-oncogene                                                                                                                                                                       | 8     | 7.4   |
| AI639319 | Transcribed sequence with weak similarity to protein ref:NP_080924.1 (M.musculus) RIKEN cDNA 4930457P18 [Mus musculus]                                                                   | 6.8   | 4.7   |
| AI639320 | Transcribed sequences                                                                                                                                                                    | 14.8  | 8.5   |
| AI639321 | Transcribed sequences                                                                                                                                                                    | 2     | 0.9   |
| AI639322 | Transcribed sequence                                                                                                                                                                     | 12    | 7     |
| AI639323 | Transcribed sequences                                                                                                                                                                    | 4     | 3.7   |
| AI639324 | Transcribed sequence with strong similarity to protein ref:NP_110420.1 (H.sapiens) hypothetical protein SP329 [Homo sapiens]                                                             | 31.7  | 27.5  |
| AI639324 | Transcribed sequence with strong similarity to protein ref:NP_110420.1 (H.sapiens) hypothetical protein SP329 [Homo sapiens]                                                             | 6.4   | 4.9   |
| AI639325 | Transcribed sequences                                                                                                                                                                    | 14.2  | 11.3  |
| AI639326 | Transcribed sequence with weak similarity to protein pir:T17234 (H.sapiens) T17234 hypothetical protein DKFZp434J046.1 - human (fragment)                                                | 22.9  | 10    |
| AI639326 | Transcribed sequence with weak similarity to protein pir:T17234 (H.sapiens) T17234 hypothetical protein DKFZp434J046.1 - human (fragment)                                                | 4.7   | 2.8   |
| AI639328 | Transcribed sequences                                                                                                                                                                    | 3.5   | 3     |
| AI639329 | Transcribed sequences                                                                                                                                                                    | 13.9  | 8.8   |
| AI639330 | Transcribed sequence                                                                                                                                                                     | 9.3   | 1.9   |
| AI639331 | Transcribed sequences                                                                                                                                                                    | 21.5  | 11.9  |
| AI639332 | Transcribed sequence                                                                                                                                                                     | 1.3   | 0.6   |
| AI639334 | Transcribed sequences                                                                                                                                                                    | 1.7   | 0.8   |
| AI639336 | Transcribed sequence with weak similarity to protein ref:NP_061229.1 (M.musculus) zinc finger protein 326; zinc finger protein [Mus musculus]                                            | 4.7   | 6     |

|          |                                                                                                                                                               |       |      |
|----------|---------------------------------------------------------------------------------------------------------------------------------------------------------------|-------|------|
| AI639337 | Transcribed sequences                                                                                                                                         | 25.1  | 29.8 |
| AI639339 | Transcribed sequences                                                                                                                                         | 12.7  | 17.5 |
| AI639340 | Transcribed sequences                                                                                                                                         | 6.3   | 5.9  |
| AI639341 | Transcribed sequences                                                                                                                                         | 2.9   | 2.2  |
| AI639343 | Transcribed sequences                                                                                                                                         | 11    | 8.6  |
| AI639345 | Transcribed sequences                                                                                                                                         | 51.7  | 35.2 |
| AI639346 | probasin                                                                                                                                                      | 12.6  | 12.8 |
| AI639348 | Transcribed sequences                                                                                                                                         | 14.3  | 6.2  |
| AI639349 | Neonatal submandibular gland protein B                                                                                                                        | 13.4  | 6.5  |
| AI639350 | Transcribed sequences                                                                                                                                         | 18.4  | 17.3 |
| AI639351 | Transcribed sequences                                                                                                                                         | 7.3   | 3.7  |
| AI639352 | Transcribed sequences                                                                                                                                         | 104.3 | 46.6 |
| AI639355 | Transcribed sequences                                                                                                                                         | 4.8   | 3.8  |
| AI639356 | Transcribed sequences                                                                                                                                         | 5.1   | 2.8  |
| AI639357 | Transcribed sequences                                                                                                                                         | 6.9   | 2.7  |
| AI639358 | Transcribed sequence                                                                                                                                          | 12.6  | 9.4  |
| AI639359 | Transcribed sequences                                                                                                                                         | 8.7   | 9.3  |
| AI639360 | Transcribed sequences                                                                                                                                         | 9.2   | 10   |
| AI639361 | Transcribed sequences                                                                                                                                         | 8.9   | 8.6  |
| AI639362 | Transcribed sequence                                                                                                                                          | 7.4   | 6.9  |
| AI639363 | Transcribed sequences                                                                                                                                         | 37.2  | 16   |
| AI639366 | Transcribed sequences                                                                                                                                         | 17.2  | 8.2  |
| AI639367 | Transcribed sequences                                                                                                                                         | 4.4   | 0.4  |
| AI639368 | Transcribed sequences                                                                                                                                         | 5.4   | 4.7  |
| AI639369 | Transcribed sequences                                                                                                                                         | 97.5  | 19.5 |
| AI639370 | Transcribed sequences                                                                                                                                         | 55    | 35.9 |
| AI639371 | Transcribed sequences                                                                                                                                         | 6.1   | 4    |
| AI639372 | Transcribed sequences                                                                                                                                         | 26.2  | 17.6 |
| AI639374 | Transcribed sequences                                                                                                                                         | 1.9   | 1.2  |
| AI639375 | Transcribed sequence with strong similarity to protein ref:NP_076086.1 (M.musculus) spermatid WD-repeat protein [Mus musculus]                                | 4.9   | 1.7  |
| AI639376 | Transcribed sequences                                                                                                                                         | 10.2  | 8.3  |
| AI639377 | Transcribed sequences                                                                                                                                         | 7.8   | 11.8 |
| AI639378 | Transcribed sequences                                                                                                                                         | 2.7   | 1.9  |
| AI639379 | Transcribed sequences                                                                                                                                         | 17.2  | 7.6  |
| AI639381 | Transcribed sequences                                                                                                                                         | 13.5  | 10.3 |
| AI639382 | Transcribed sequences                                                                                                                                         | 6.2   | 3.1  |
| AI639383 | Transcribed sequences                                                                                                                                         | 14.3  | 18.6 |
| AI639384 | Transcribed sequence with strong similarity to protein sp:Q9Z2C9 (M.musculus) MTR7_MOUSE Myotubularin related protein 7                                       | 8.3   | 6.6  |
| AI639385 | Transcribed sequences                                                                                                                                         | 9.3   | 8    |
| AI639386 | Transcribed sequences                                                                                                                                         | 5.3   | 3.1  |
| AI639388 | Transcribed sequences                                                                                                                                         | 7.3   | 5.5  |
| AI639390 | Transcribed sequences                                                                                                                                         | 15.9  | 12.8 |
| AI639391 | Rattus norvegicus mRNA for putative membrane protein Re9 (member 1)                                                                                           | 61.2  | 21.1 |
| AI639392 | Transcribed sequences                                                                                                                                         | 20.4  | 5.6  |
| AI639393 | Transcribed sequence with weak similarity to protein sp:P08775 (M.musculus) RPB1_MOUSE DNA-directed RNA polymerase II largest subunit (RPB1)                  | 40.4  | 18.4 |
| AI639394 | Transcribed sequences                                                                                                                                         | 14.9  | 7    |
| AI639395 | Transcribed sequences                                                                                                                                         | 7.9   | 8.5  |
| AI639396 | Transcribed sequence with moderate similarity to protein sp:P25111 (R.norvegicus) RS25_HUMAN 40S ribosomal protein S25                                        | 47.1  | 52.6 |
| AI639397 | Transcribed sequence with weak similarity to protein pir:A35364 (R.norvegicus) A35364 carcinoembryonic antigen-related protein (clone rCGM1) - rat            | 8.7   | 9.6  |
| AI639399 | Transcribed sequences                                                                                                                                         | 23.5  | 5.6  |
| AI639400 | Transcribed sequence                                                                                                                                          | 23.6  | 17.9 |
| AI639401 | Transcribed sequence with weak similarity to protein pir:A45973 (H.sapiens) A45973 trichohyalin - human                                                       | 9.7   | 6.7  |
| AI639402 | Transcribed sequences                                                                                                                                         | 8.4   | 9.6  |
| AI639403 | Transcribed sequences                                                                                                                                         | 8     | 8.8  |
| AI639404 | Transcribed sequences                                                                                                                                         | 11.4  | 7.5  |
| AI639405 | Transcribed sequences                                                                                                                                         | 22.2  | 17.5 |
| AI639406 | Transcribed sequences                                                                                                                                         | 27.1  | 8.1  |
| AI639409 | Transcribed sequences                                                                                                                                         | 15.7  | 11.3 |
| AI639410 | Transcribed sequences                                                                                                                                         | 6.1   | 5.9  |
| AI639411 | Transcribed sequence with strong similarity to protein ref:NP_055121.1 (H.sapiens) similar to C. elegans hypothetical 55.2 kD protein F16A11.2 [Homo sapiens] | 3.3   | 2.5  |
| AI639412 | Transcribed sequence with weak similarity to protein sp:P47853 (R.norvegicus) PGS1_RAT Bone/cartilage proteoglycan I precursor (Biglycan) (PG-S1)             | 4.1   | 4.1  |
| AI639413 | Transcribed sequences                                                                                                                                         | 14.4  | 18.3 |
| AI639415 | Transcribed sequence with weak similarity to protein pir:A40452 (R.norvegicus) A40452 keratin 21, type I, cytoskeletal - rat                                  | 21.5  | 23.4 |
| AI639417 | Transcribed sequences                                                                                                                                         | 9.5   | 4.7  |
| AI639418 | deiodinase, iodothyronine, type I                                                                                                                             | 15.3  | 11   |
| AI639419 | Transcribed sequence with moderate similarity to protein ref:NP_062805.1 (M.musculus) zinc finger protein 261; DXHXS6673E [Mus musculus]                      | 8.5   | 7.7  |
| AI639420 | Transcribed sequences                                                                                                                                         | 8.6   | 7.9  |
| AI639421 | Transcribed sequences                                                                                                                                         | 7.7   | 3.9  |
| AI639423 | Transcribed sequences                                                                                                                                         | 8.8   | 5    |

|          |                                                                                                                                                                                                                                                                                   |      |      |
|----------|-----------------------------------------------------------------------------------------------------------------------------------------------------------------------------------------------------------------------------------------------------------------------------------|------|------|
| AI639425 | Transcribed sequences                                                                                                                                                                                                                                                             | 63.7 | 23.4 |
| AI639426 | Transcribed sequences                                                                                                                                                                                                                                                             | 6.7  | 2.4  |
| AI639427 | Transcribed sequences                                                                                                                                                                                                                                                             | 20.7 | 18.9 |
| AI639428 | Thyroglobulin                                                                                                                                                                                                                                                                     | 2.3  | 2.2  |
| AI639429 | Transcribed sequences                                                                                                                                                                                                                                                             | 13.5 | 9.3  |
| AI639430 | Transcribed sequences                                                                                                                                                                                                                                                             | 9.1  | 7.8  |
| AI639431 | Transcribed sequences                                                                                                                                                                                                                                                             | 10.5 | 6.1  |
| AI639432 | Transcribed sequences                                                                                                                                                                                                                                                             | 45   | 18.5 |
| AI639433 | Transcribed sequences                                                                                                                                                                                                                                                             | 23.6 | 13.4 |
| AI639434 | Transcribed sequence with weak similarity to protein ref:NP_079795.1 (M.musculus) RIKEN cDNA 2310010I16 [Mus musculus]                                                                                                                                                            | 45.3 | 16.9 |
| AI639435 | Transcribed sequence with weak similarity to protein pir:A33915 (R.norvegicus) A33915 cerebellar polypeptide 19 - rat                                                                                                                                                             | 16.2 | 11.1 |
| AI639436 | beta-1,6-N-acetylglucosaminyltransferase                                                                                                                                                                                                                                          | 10.2 | 5.3  |
| AI639437 | Transcribed sequence                                                                                                                                                                                                                                                              | 1.1  | 0.4  |
| AI639438 | Transcribed sequence with moderate similarity to protein ref:NP_542365.1 (M.musculus) Hermansky-Pudlak syndrome 3 homolog (human); cocoa [Mus musculus]                                                                                                                           | 10.1 | 15.8 |
| AI639439 | Transcribed sequences                                                                                                                                                                                                                                                             | 5    | 8.6  |
| AI639440 | Transcribed sequence                                                                                                                                                                                                                                                              | 62.9 | 29   |
| AI639441 | eukaryotic translation initiation factor 2B, subunit 3 (gamma, 58kD)                                                                                                                                                                                                              | 51.4 | 28   |
| AI639442 | Transcribed sequence with moderate similarity to protein ref:NP_061933.1 (H.sapiens) NICE-1 protein [Homo sapiens]                                                                                                                                                                | 11.5 | 7.6  |
| AI639443 | Transcribed sequences                                                                                                                                                                                                                                                             | 20.6 | 5.5  |
| AI639444 | sarcomeric muscle protein                                                                                                                                                                                                                                                         | 13.3 | 17.8 |
| AI639444 | sarcomeric muscle protein                                                                                                                                                                                                                                                         | 3.5  | 2.3  |
| AI639445 | Transcribed sequences                                                                                                                                                                                                                                                             | 15   | 21.6 |
| AI639446 | Transcribed sequences                                                                                                                                                                                                                                                             | 28.6 | 8.8  |
| AI639447 | Transcribed sequence with strong similarity to protein ref:NP_062760.1 (M.musculus) TANK-binding kinase 1; TANK binding kinase TBK1 [Mus musculus]                                                                                                                                | 33.8 | 18.1 |
| AI639448 | A5D3 protein                                                                                                                                                                                                                                                                      | 5.7  | 4.7  |
| AI639449 | Transcribed sequences                                                                                                                                                                                                                                                             | 7.9  | 2.7  |
| AI639450 | Transcribed sequence                                                                                                                                                                                                                                                              | 6.6  | 9.9  |
| AI639451 | Transcribed sequences                                                                                                                                                                                                                                                             | 14.5 | 7    |
| AI639452 | Transcribed sequences                                                                                                                                                                                                                                                             | 5.3  | 2.4  |
| AI639453 | Transcribed sequences                                                                                                                                                                                                                                                             | 22   | 16.8 |
| AI639453 | Transcribed sequences                                                                                                                                                                                                                                                             | 13.2 | 14.9 |
| AI639454 | Transcribed sequences                                                                                                                                                                                                                                                             | 2.8  | 1.8  |
| AI639455 | Transcribed sequence with weak similarity to protein ref:NP_075579.1 (R.norvegicus) gamma-aminobutyric acid (GABA-A) receptor, subunit epsilon [Rattus norvegicus]                                                                                                                | 9.4  | 14.7 |
| AI639456 | Transcribed sequences                                                                                                                                                                                                                                                             | 9.5  | 11   |
| AI639457 | Transcribed sequences                                                                                                                                                                                                                                                             | 3.8  | 4.2  |
| AI639457 | Transcribed sequences                                                                                                                                                                                                                                                             | 2.9  | 1.1  |
| AI639458 | Transcribed sequence                                                                                                                                                                                                                                                              | 4.1  | 1.3  |
| AI639459 | Transcribed sequence with weak similarity to protein sp:P10267 (H.sapiens) ENV1_HUMAN Endogenous retrovirus HERV-K10 putative env polyprotein                                                                                                                                     | 4.9  | 4.5  |
| AI639460 | Transcribed sequences                                                                                                                                                                                                                                                             | 38.9 | 24.9 |
| AI639461 | Transcribed sequences                                                                                                                                                                                                                                                             | 45.2 | 26.2 |
| AI639462 | Transcribed sequence with moderate similarity to protein pir:I60307 (E. coli) I60307 beta-galactosidase, alpha peptide - Escherichia coli                                                                                                                                         | 9.3  | 3.5  |
| AI639463 | Transcribed sequences                                                                                                                                                                                                                                                             | 5.7  | 6.6  |
| AI639464 | Transcribed sequences                                                                                                                                                                                                                                                             | 1.9  | 1.8  |
| AI639465 | ring finger protein 28                                                                                                                                                                                                                                                            | 8.5  | 4.6  |
| AI639467 | Transcribed sequences                                                                                                                                                                                                                                                             | 42.1 | 28.4 |
| AI639470 | Transcribed sequences                                                                                                                                                                                                                                                             | 6.8  | 8.5  |
| AI639470 | Transcribed sequences                                                                                                                                                                                                                                                             | 5.2  | 4.5  |
| AI639471 | Transcribed sequence                                                                                                                                                                                                                                                              | 12.1 | 7.8  |
| AI639472 | Transcribed sequences                                                                                                                                                                                                                                                             | 2.4  | 0.9  |
| AI639473 | Transcribed sequences                                                                                                                                                                                                                                                             | 1.9  | 0.3  |
| AI639474 | Transcribed sequences                                                                                                                                                                                                                                                             | 21.6 | 7.8  |
| AI639475 | Transcribed sequence with strong similarity to protein ref:NP_080494.1 (M.musculus) RIKEN cDNA 1500031J01 [Mus musculus]                                                                                                                                                          | 16.7 | 14.3 |
| AI639476 | Transcribed sequence with strong similarity to protein ref:NP_058622.1 (M.musculus) squamous cell carcinoma antigen recognized by T-cells 3 [Mus musculus]                                                                                                                        | 27.8 | 15   |
| AI639477 | Transcribed sequences                                                                                                                                                                                                                                                             | 61   | 26.9 |
| AI639478 | Transcribed sequence with weak similarity to protein sp:P04785 (R.norvegicus) PDI_RAT Protein disulfide isomerase precursor (PDI) (Prolyl 4-hydroxylase beta subunit) (Cellular thyroid hormone binding protein) (Thyroxine deiodinase) (Iodothyronine 5'-monodeiodinase) (5'-MD) | 18.1 | 11.8 |
| AI639479 | Transcribed sequence with strong similarity to protein prf:2008147A (R.norvegicus) 2008147A protein RAKb [Rattus norvegicus]                                                                                                                                                      | 8.4  | 7.4  |
| AI639482 | Transcribed sequences                                                                                                                                                                                                                                                             | 3.7  | 1.4  |
| AI639483 | Transcribed sequences                                                                                                                                                                                                                                                             | 15.1 | 12.3 |
| AI639484 | synaptic vesicle glycoprotein 2 b                                                                                                                                                                                                                                                 | 11.6 | 9.9  |
| AI639485 | Transcribed sequences                                                                                                                                                                                                                                                             | 5    | 3.9  |
| AI639486 | Transcribed sequence with weak similarity to protein sp:Q63880 (M.musculus) ESTM_MOUSE LIVER CARBOXYLESTERASE PRECURSOR (ES-MALE) (ESTERASE-31)                                                                                                                                   | 10.8 | 7.8  |
| AI639487 | Transcribed sequences                                                                                                                                                                                                                                                             | 1.5  | 0.8  |
| AI639488 | Transcribed sequence with strong similarity to protein pir:A42772 (R.norvegicus) A42772 mdm2 protein - rat (fragments)                                                                                                                                                            | 28.5 | 2.6  |

|          |                                                                                                                                                                                                                                                                                                                   |       |       |
|----------|-------------------------------------------------------------------------------------------------------------------------------------------------------------------------------------------------------------------------------------------------------------------------------------------------------------------|-------|-------|
| AI639489 | Transcribed sequence with moderate similarity to protein sp:Q9EQ28 (M.musculus) DPD3_MOUSE DNA polymerase delta subunit 3 (DNA polymerase delta subunit p66)                                                                                                                                                      | 47.7  | 10.4  |
| AI639491 | Transcribed sequences                                                                                                                                                                                                                                                                                             | 12.4  | 8.1   |
| AI639492 | Transcribed sequence with weak similarity to protein pdb:1FI8 (R.norvegicus) A Chain A, Rat Granzyme B [n66g] Complexed To Ecotin [81-84 lepd]                                                                                                                                                                    | 1.5   | 1     |
| AI639493 | Transcribed sequences                                                                                                                                                                                                                                                                                             | 3.4   | 1     |
| AI639494 | Transcribed sequence with strong similarity to protein ref:NP_075779.1 (M.musculus) makorin, ring finger protein, 2; Makorin RING zinc-finger protein 2 [Mus musculus]                                                                                                                                            | 19    | 13.5  |
| AI639495 | Transcribed sequences                                                                                                                                                                                                                                                                                             | 11.6  | 10.8  |
| AI639496 | Transcribed sequences                                                                                                                                                                                                                                                                                             | 4.5   | 3     |
| AI639497 | Transcribed sequences                                                                                                                                                                                                                                                                                             | 3.1   | 2.4   |
| AI639498 | Transcribed sequences                                                                                                                                                                                                                                                                                             | 7.1   | 2.2   |
| AI639499 | Transcribed sequences                                                                                                                                                                                                                                                                                             | 17.7  | 7.1   |
| AI639500 | Transcribed sequences                                                                                                                                                                                                                                                                                             | 5.3   | 7.9   |
| AI639500 | Transcribed sequences                                                                                                                                                                                                                                                                                             | 0.9   | 0.3   |
| AI639501 | Transcribed sequences                                                                                                                                                                                                                                                                                             | 18.7  | 7.1   |
| AI639503 | Transcribed sequence                                                                                                                                                                                                                                                                                              | 18.4  | 8.9   |
| AI639504 | Transcribed sequence with weak similarity to protein pir:T13607 (D.melanogaster) T13607 hypothetical protein 87B1.3 - fruit fly (Drosophila melanogaster)                                                                                                                                                         | 12.2  | 10    |
| AI639505 | Transcribed sequences                                                                                                                                                                                                                                                                                             | 2.3   | 2.9   |
| AI639506 | Transcribed sequences                                                                                                                                                                                                                                                                                             | 2.1   | 1.6   |
| AI639507 | Transcribed sequences                                                                                                                                                                                                                                                                                             | 14.2  | 8.5   |
| AI639509 | Transcribed sequence with moderate similarity to protein ref:NP_006435.1 (H.sapiens) SMC2 structural maintenance of chromosomes 2-like 1; structural maintenance of chromosomes (SMC) family member, chromosome-associated protein E; SMC2 (structural maintenance of chromosomes 2, yeast)-like 1 [Homo sapiens] | 2.1   | 2.7   |
| AI639510 | Transcribed sequences                                                                                                                                                                                                                                                                                             | 18.2  | 12    |
| AI639511 | Transcribed sequences                                                                                                                                                                                                                                                                                             | 17.8  | 9.3   |
| AI639512 | Transcribed sequences                                                                                                                                                                                                                                                                                             | 28.4  | 13.2  |
| AI639513 | Transcribed sequences                                                                                                                                                                                                                                                                                             | 2.3   | 1.2   |
| AI639514 | Transcribed sequences                                                                                                                                                                                                                                                                                             | 16.3  | 12.1  |
| AI639515 | Transcribed sequences                                                                                                                                                                                                                                                                                             | 215.2 | 135.3 |
| AI639516 | Transcribed sequences                                                                                                                                                                                                                                                                                             | 4.7   | 4.5   |
| AI639517 | Transcribed sequence with strong similarity to protein pir:S55370 (H.sapiens) S55370 RNA polymerase II chain hRPB17 - human                                                                                                                                                                                       | 121   | 63.1  |
| AI639518 | Transcribed sequence with strong similarity to protein pir:S55370 (H.sapiens) S55370 RNA polymerase II chain hRPB17 - human                                                                                                                                                                                       | 46.5  | 19.8  |
| AI639519 | Transcribed sequence                                                                                                                                                                                                                                                                                              | 13    | 16    |
| AI639520 | Transcribed sequences                                                                                                                                                                                                                                                                                             | 4.6   | 2     |
| AI639521 | Transcribed sequences                                                                                                                                                                                                                                                                                             | 1.5   | 1.1   |
| AI639522 | Transcribed sequences                                                                                                                                                                                                                                                                                             | 3.8   | 1.6   |
| AI639523 | Transcribed sequence with weak similarity to protein pir:A32612 (R.norvegicus) A32612 spectrin alpha chain, nonerythroid - rat (fragment)                                                                                                                                                                         | 10    | 12.1  |
| AI639524 | Transcribed sequences                                                                                                                                                                                                                                                                                             | 14.2  | 6.3   |
| AI639524 | Transcribed sequences                                                                                                                                                                                                                                                                                             | 3.4   | 5.3   |
| AI639525 | Transcribed sequences                                                                                                                                                                                                                                                                                             | 6.9   | 5.8   |
| AI639526 | Seminal vesicle protein, secretion 2                                                                                                                                                                                                                                                                              | 13    | 7.8   |
| AI639527 | Transcribed sequences                                                                                                                                                                                                                                                                                             | 2.8   | 1.3   |
| AI639528 | Transcribed sequence with moderate similarity to protein ref:NP_065598.1 (M.musculus) oxysterol binding protein-like 1A; cDNA sequence AB017026 [Mus musculus]                                                                                                                                                    | 2.7   | 3.4   |
| AI639528 | Transcribed sequence with moderate similarity to protein ref:NP_065598.1 (M.musculus) oxysterol binding protein-like 1A; cDNA sequence AB017026 [Mus musculus]                                                                                                                                                    | 1.2   | 0.6   |
| AI639529 | Transcribed sequences                                                                                                                                                                                                                                                                                             | 3.4   | 2.5   |
| AI639530 | Transcribed sequences                                                                                                                                                                                                                                                                                             | 16.4  | 14.7  |
| AI639531 | uterine-specific proline-rich acidic protein                                                                                                                                                                                                                                                                      | 23.5  | 16.7  |
| AI639532 | Rat troponin-c mRNA                                                                                                                                                                                                                                                                                               | 3.3   | 1     |
| AI639533 | Transcribed sequences                                                                                                                                                                                                                                                                                             | 109.6 | 45.3  |
| AI639533 | Transcribed sequences                                                                                                                                                                                                                                                                                             | 9.4   | 5     |
| AI639534 | Transcribed sequence with weak similarity to protein sp:Q9ESP7 (R.norvegicus) ATS4_RAT ADAMTS-4 precursor (A disintegrin and metalloproteinase with thrombospondin motifs 4) (ADAM-TS 4) (ADAM-TS4) (Aggrecanase 1)                                                                                               | 20.8  | 11.8  |
| AI639535 | Transcribed sequence with weak similarity to protein ref:NP_445944.1 (R.norvegicus) transporter-like protein [Rattus norvegicus]                                                                                                                                                                                  | 9.5   | 4.7   |
| AI639536 | Transcribed sequences                                                                                                                                                                                                                                                                                             | 42.4  | 25.9  |
| AJ000347 | 3(2),5-bisphosphate nucleotidase                                                                                                                                                                                                                                                                                  | 20.4  | 9.5   |
| AJ000485 | cytoplasmic linker 2                                                                                                                                                                                                                                                                                              | 27.8  | 12.3  |
| AJ000515 | cyclic nucleotide-gated channel beta subunit 1                                                                                                                                                                                                                                                                    | 16.3  | 3.8   |
| AJ000556 | Janus kinase 1                                                                                                                                                                                                                                                                                                    | 13.1  | 9     |
| AJ000557 | Janus kinase 2 (a protein tyrosine kinase)                                                                                                                                                                                                                                                                        | 13.7  | 6.2   |
| AJ000696 | kinesin 1C                                                                                                                                                                                                                                                                                                        | 19.4  | 12.2  |
| AJ001029 | SRY-box containing gene 10                                                                                                                                                                                                                                                                                        | 5     | 3     |
| AJ001043 | GPI-anchored metastasis-associated protein homolog                                                                                                                                                                                                                                                                | 1.7   | 0.4   |
| AJ001044 | tumor-associated calcium signal transducer 1                                                                                                                                                                                                                                                                      | 9.8   | 11    |
| AJ001184 | linker for activation of T cells                                                                                                                                                                                                                                                                                  | 9.1   | 7.2   |
| AJ001290 | solute carrier family 5 (inositol transporters), member 3                                                                                                                                                                                                                                                         | 13.2  | 9.6   |
| AJ001320 | multiple PDZ domain protein                                                                                                                                                                                                                                                                                       | 14.3  | 8.3   |
| AJ001380 | Tspy pseudogene                                                                                                                                                                                                                                                                                                   | 18.2  | 19.2  |
| AJ001380 | Tspy pseudogene                                                                                                                                                                                                                                                                                                   | 7.7   | 7.4   |
| AJ001517 | hemochromatosis                                                                                                                                                                                                                                                                                                   | 31.2  | 17    |

|          |                                                                                                                                          |       |      |
|----------|------------------------------------------------------------------------------------------------------------------------------------------|-------|------|
| AJ001529 | serine/threonine kinase 3                                                                                                                | 12.6  | 8.1  |
| AJ001637 | phosphate regulating gene with homologies to endopeptidases on the X chromosome                                                          | 5     | 5.7  |
| AJ001713 | myosin IXA                                                                                                                               | 19.8  | 12.2 |
| AJ002259 | Short stature homeobox 2                                                                                                                 | 30.4  | 21.2 |
| AJ002259 | Short stature homeobox 2                                                                                                                 | 1.5   | 0.6  |
| AJ002424 | p65 protein                                                                                                                              | 12.2  | 8.4  |
| AJ002474 | Testis-specific A-kinase-anchoring-protein                                                                                               | 4     | 2.8  |
| AJ002556 | microtubule-associated protein 6                                                                                                         | 6.4   | 3.8  |
| AJ002745 | chemokine-like receptor 1                                                                                                                | 6.6   | 1.9  |
| AJ002940 | Retinoic acid receptor, alpha                                                                                                            | 3.8   | 1.8  |
| AJ002942 | Retinoic acid receptor, beta                                                                                                             | 4.4   | 1.4  |
| AJ002967 | Utrophin                                                                                                                                 | 41.1  | 20.1 |
| AJ003065 | potassium inwardly-rectifying channel J14                                                                                                | 6     | 4    |
| AJ003148 | growth arrest specific 7                                                                                                                 | 7.3   | 5.3  |
| AJ004858 | SRY-box containing gene 11                                                                                                               | 6.3   | 6    |
| AJ005023 | mature MHC class Ib alpha chain                                                                                                          | 43.8  | 16.9 |
| AJ005046 | fructose biphosphatase 2                                                                                                                 | 6.8   | 2    |
| AJ005046 | fructose biphosphatase 2                                                                                                                 | 1.5   | 0.8  |
| AJ005113 | SMC-like 1 (yeast)                                                                                                                       | 32.6  | 15.4 |
| AJ005113 | SMC-like 1 (yeast)                                                                                                                       | 10.9  | 9.7  |
| AJ005394 | collagen, type V, alpha 1                                                                                                                | 28.2  | 14.8 |
| AJ005396 | procollagen, type XI, alpha 1                                                                                                            | 8     | 5.9  |
| AJ005424 | mitogen-activated protein kinase 7                                                                                                       | 18.8  | 5.3  |
| AJ005424 | mitogen-activated protein kinase 7                                                                                                       | 11.3  | 9.7  |
| AJ005425 | myocyte enhancer factor 2D                                                                                                               | 38.6  | 21   |
| AJ005641 | brain serine protease bsp1                                                                                                               | 9.4   | 7.5  |
| AJ005642 | brain serine protease bsp2                                                                                                               | 16.7  | 12.4 |
| AJ005984 | endosulfine alpha                                                                                                                        | 29    | 32.2 |
| AJ006070 | recombination activation protein 1                                                                                                       | 4.6   | 3.9  |
| AJ006295 | myeloid/lymphoid or mixed-lineage leukemia (trithorax (Drosophila) homolog); translocated to, 3                                          | 1     | 0.6  |
| AJ006519 | amiloride-sensitive cation channel 2, neuronal                                                                                           | 25.8  | 14.8 |
| AJ006522 | muscarinic acetylcholine receptor protein                                                                                                | 15.2  | 7.2  |
| AJ006710 | phosphatidylinositol 3-kinase                                                                                                            | 24.6  | 21.8 |
| AJ006855 | synaptotagmin 1                                                                                                                          | 15.7  | 10.7 |
| AJ006971 | Death-associated like kinase                                                                                                             | 30    | 27.3 |
| AJ006971 | Death-associated like kinase                                                                                                             | 14.8  | 11.6 |
| AJ007288 | neutrophil collagenase                                                                                                                   | 4.9   | 4.8  |
| AJ007422 | centaurin, alpha 1                                                                                                                       | 19.6  | 10.6 |
| AJ007488 | mitochondrion 16S ribosomal                                                                                                              | 40.4  | 24.8 |
| AJ007627 | potassium voltage-gated channel, subfamily H (eag-related), member 3                                                                     | 128   | 46.7 |
| AJ007628 | potassium voltage-gated channel, subfamily H (eag-related), member 4                                                                     | 26.4  | 5.7  |
| AJ010351 | CUG triplet repeat,RNA-binding protein 2                                                                                                 | 13.9  | 8.8  |
| AJ010386 | CUG triplet repeat,RNA-binding protein 2                                                                                                 | 22.1  | 17.7 |
| AJ010828 | chemokine orphan receptor 1                                                                                                              | 2.4   | 1    |
| AJ011005 | paired-like homeodomain transcription factor 3                                                                                           | 58.5  | 34.8 |
| AJ011035 | phospholipase C beta 2                                                                                                                   | 27.2  | 16.8 |
| AJ011115 | nitric oxide synthase 3                                                                                                                  | 28.8  | 20.8 |
| AJ011115 | nitric oxide synthase 3                                                                                                                  | 9.4   | 6.3  |
| AJ011116 | nitric oxide synthase 3                                                                                                                  | 4.6   | 5.3  |
| AJ011370 | 5-hydroxytryptamine (serotonin) receptor 4                                                                                               | 26.3  | 15.1 |
| AJ011370 | 5-hydroxytryptamine (serotonin) receptor 4                                                                                               | 4.3   | 1.5  |
| AJ011605 | DNA polymerase alpha subunit I                                                                                                           | 5.2   | 4.2  |
| AJ011606 | DNA polymerase alpha subunit II                                                                                                          | 15.7  | 16.8 |
| AJ011607 | DNA polymerase alpha subunit III (primase)                                                                                               | 21.2  | 13.3 |
| AJ011607 | DNA polymerase alpha subunit III (primase)                                                                                               | 7.5   | 5.9  |
| AJ011608 | Rattus norvegicus mRNA for DNA polymerase alpha subunit IV (primase), partial                                                            | 11.7  | 5.5  |
| AJ011656 | cldn3 gene                                                                                                                               | 6.3   | 1.4  |
| AJ011811 | claudin 7                                                                                                                                | 25.8  | 10.6 |
| AJ011811 | claudin 7                                                                                                                                | 7.3   | 7.5  |
| AJ011969 | growth differentiation factor 15                                                                                                         | 2.5   | 1.1  |
| AJ012482 | phosphatidylinositol 3-kinase, catalytic subunit, beta isoform                                                                           | 18.3  | 10   |
| AJ131848 | procollagen, type X, alpha 1                                                                                                             | 5.4   | 5.9  |
| AJ131888 | sperm autoantigenic protein 17                                                                                                           | 8.9   | 5.7  |
| AJ132230 | Bradykinin receptor B1                                                                                                                   | 21.3  | 18.4 |
| AJ132352 | secretory protein, 45kD                                                                                                                  | 28.2  | 11.4 |
| AJ222691 | DNA polymerase delta, catalytic subunit                                                                                                  | 14.7  | 12.3 |
| AJ222724 | small glutamine-rich tetratricopeptide repeat (TPR) containing protein (SGT)                                                             | 45.9  | 9.9  |
| AJ223083 | retinoid X receptor gamma                                                                                                                | 1.7   | 0.9  |
| AJ223184 | immunoglobulin superfamily, member 6                                                                                                     | 26.4  | 13.8 |
| AJ224120 | peroxisomal membrane protein Pmp26p (Peroxin-11)                                                                                         | 22.6  | 11.4 |
| AJ224156 | UDP-glucose:ceramide glycosyltransferase                                                                                                 | 7.2   | 7.9  |
| AJ224441 | Rattus norvegicus unknown mRNA upregulated during prostatic apoptosis, 3'UTR, partial                                                    | 1.5   | 1.2  |
| AJ224680 | cyclic nucleotide-gated channel beta subunit 1                                                                                           | 36.6  | 19.2 |
| AJ224680 | cyclic nucleotide-gated channel beta subunit 1                                                                                           | 12.2  | 11.3 |
| AJ224879 | procollagen, type II, alpha 1                                                                                                            | 25.7  | 18.1 |
| C06598   | Transcribed sequence with weak similarity to protein ref:NP_445760.1 (R.norvegicus) FK506 binding protein 2 (13 kDa) [Rattus norvegicus] | 156.8 | 42.5 |
| C07012   | peptidylprolyl isomerase C-associated protein                                                                                            | 143.9 | 83.2 |
| D00036   | phospholipase A2, group 1B                                                                                                               | 5.6   | 2.9  |

|        |                                                                                          |       |      |
|--------|------------------------------------------------------------------------------------------|-------|------|
| D00092 | dihydrolipoamide acetyltransferase                                                       | 3.5   | 1.8  |
| D00362 | Esterase 2                                                                               | 12.9  | 8.1  |
| D00512 | acetyl-coenzyme A acetyltransferase 1                                                    | 54.6  | 15.3 |
| D00512 | acetyl-coenzyme A acetyltransferase 1                                                    | 14.4  | 10.6 |
| D00568 | cytochrome P450, subfamily 11B, polypeptide 2                                            | 5     | 2.1  |
| D00569 | 2,4-dienoyl CoA reductase 1, mitochondrial                                               | 10.4  | 6.4  |
| D00569 | 2,4-dienoyl CoA reductase 1, mitochondrial                                               | 6.2   | 3.8  |
| D00575 | glycoprotein hormones, alpha subunit                                                     | 24.7  | 9.7  |
| D00634 | adrenergic receptor, beta 1                                                              | 19.2  | 12.1 |
| D00636 | diaphorase 1                                                                             | 16.7  | 9.9  |
| D00636 | diaphorase 1                                                                             | 54.9  | 22.5 |
| D00680 | glutathione peroxidase 3                                                                 | 25.9  | 22.2 |
| D00688 | monoamine oxidase A                                                                      | 35.7  | 28.7 |
| D00698 | insulin-like growth factor 1                                                             | 15.3  | 8.6  |
| D00729 | Rattus norvegicus mRNA for delta3, delta2-enoyl-CoA isomerase, complete cds              | 9     | 7.8  |
| D00729 | Rattus norvegicus mRNA for delta3, delta2-enoyl-CoA isomerase, complete cds              | 4     | 2.2  |
| D00752 | cytochrome P450, family 27, subfamily a, polypeptide 1                                   | 4.6   | 2    |
| D00753 | Serine protease inhibitor                                                                | 17.7  | 18.8 |
| D00833 | Glycine receptor, alpha 1 subunit                                                        | 16.4  | 13.9 |
| D00833 | Glycine receptor, alpha 1 subunit                                                        | 11.9  | 7.1  |
| D00913 | intercellular adhesion molecule 1                                                        | 34.2  | 11.5 |
| D00920 | androgen-responsive protein pSv-1                                                        | 13.7  | 8    |
| D00921 | androgen-responsive protein pSv-2                                                        | 6.4   | 9.1  |
| D01046 | RAB11B, member RAS oncogene family                                                       | 5.1   | 2.5  |
| D10026 | glutathione S-transferase, theta 2                                                       | 23.4  | 12.2 |
| D10106 | Platelet-derived growth factor A chain                                                   | 3.4   | 0.9  |
| D10233 | renin-binding protein                                                                    | 32.9  | 15.5 |
| D10261 | alpha-2-HS-glycoprotein                                                                  | 23.6  | 15.2 |
| D10261 | alpha-2-HS-glycoprotein                                                                  | 10.3  | 4.2  |
| D10262 | choline kinase                                                                           | 26.3  | 22.7 |
| D10354 | glutamic-pyruvate transaminase (alanine aminotransferase)                                | 33.5  | 28.1 |
| D10392 | syntaxin 1a                                                                              | 37.9  | 17.6 |
| D10393 | protein phosphatase 3, regulatory subunit B, alpha isoform,type 2                        | 1.8   | 1    |
| D10554 | hepatocyte nuclear factor 4, alpha                                                       | 7.2   | 4.9  |
| D10587 | 85kDa sialoglycoprotein                                                                  | 57.4  | 34.3 |
| D10655 | dihydrolipoamide acetyltransferase                                                       | 35.8  | 7.5  |
| D10666 | visinin-like 1                                                                           | 4.6   | 4.3  |
| D10693 | histamine N-methyltransferase                                                            | 4.4   | 4    |
| D10699 | ubiquitin carboxy-terminal hydrolase L1                                                  | 15.6  | 11.1 |
| D10699 | ubiquitin carboxy-terminal hydrolase L1                                                  | 1.8   | 0.3  |
| D10709 | Isk protein                                                                              | 19.1  | 11.1 |
| D10728 | CD5 antigen                                                                              | 3.5   | 1.3  |
| D10729 | proteasome (prosome, macropain) subunit, beta type, 8 (low molecular mass polypeptide 7) | 26.8  | 16.6 |
| D10754 | proteasome (prosome, macropain) subunit, beta type 6                                     | 28    | 28.3 |
| D10756 | proteasome (prosome, macropain) subunit, alpha type 5                                    | 32.1  | 15.5 |
| D10757 | proteasome (prosome, macropain) subunit, beta type 9 (large multifunctional protease 2)  | 28.7  | 8.8  |
| D10757 | proteasome (prosome, macropain) subunit, beta type 9 (large multifunctional protease 2)  | 8.8   | 12.4 |
| D10763 | Erythropoietin                                                                           | 8.6   | 9.3  |
| D10770 | beta isoform of catalytic subunit of cAMP-dependent protein kinase,                      | 6.6   | 8.3  |
| D10831 | selectin, lymphocyte                                                                     | 2.5   | 1    |
| D10852 | mannoside acetyl glucosaminyltransferase 3                                               | 25.3  | 35.9 |
| D10853 | phosphoribosyl pyrophosphate amidotransferase                                            | 5.6   | 5.6  |
| D10891 | glutamate receptor, metabotropic 5                                                       | 9.1   | 5.8  |
| D10926 | tissue factor pathway inhibitor                                                          | 18.9  | 15.2 |
| D10938 | brain-derived neurotrophic factor                                                        | 4.4   | 3.1  |
| D11354 | Cytochrome P450, subfamily XIB gene cluster                                              | 12.8  | 10   |
| D11439 | Glucose-dependent insulinotropic peptide                                                 | 7.6   | 5.5  |
| D11445 | gro                                                                                      | 34.1  | 22.3 |
| D12498 | Fibroblast growth factor receptor 1                                                      | 65.1  | 14   |
| D12516 | hairy and enhancer of split 5 (Drosophila)                                               | 21.6  | 25.3 |
| D12516 | hairy and enhancer of split 5 (Drosophila)                                               | 8.5   | 2.1  |
| D12519 | syntaxin 1a                                                                              | 16    | 13.9 |
| D12524 | c-kit receptor tyrosine kinase                                                           | 3     | 1.2  |
| D12524 | c-kit receptor tyrosine kinase                                                           | 1.9   | 1    |
| D12573 | hippocalcin                                                                              | 130.1 | 69.7 |
| D12768 | Sp1 transcription factor                                                                 | 13.8  | 11.1 |
| D12769 | Kruppel-like factor 9                                                                    | 17.5  | 13.2 |
| D12769 | Kruppel-like factor 9                                                                    | 9.1   | 7.3  |
| D12800 | Histamine receptor H1                                                                    | 9     | 9.8  |
| D12820 | GUST27 protein                                                                           | 23.5  | 22.7 |
| D12927 | transcription elongation factor A2                                                       | 14.9  | 14.9 |
| D12978 | POU domain, class 2, transcription factor 1                                              | 5     | 5.4  |
| D13122 | ATPase inhibitor                                                                         | 2.1   | 1.3  |
| D13125 | neural visinin-like Ca2+-binding protein type 2                                          | 7.5   | 4.8  |
| D13126 | neural visinin-like Ca2+-binding protein type 3                                          | 35.6  | 17.4 |
| D13211 | glutamate receptor, ionotropic, N-methyl D-aspartate 2A                                  | 13.4  | 10   |
| D13212 | glutamate receptor, ionotropic, NMDA2C                                                   | 58.1  | 18.4 |
| D13213 | glutamate receptor, ionotropic, NMDA2D                                                   | 8.9   | 12.2 |
| D13376 | Adenylate kinase 1                                                                       | 23.5  | 7.8  |

|        |                                                                                                                                       |       |      |
|--------|---------------------------------------------------------------------------------------------------------------------------------------|-------|------|
| D13417 | hairy and enhancer of split 1 (Drosophila)                                                                                            | 56.6  | 20.7 |
| D13417 | hairy and enhancer of split 1 (Drosophila)                                                                                            | 27.8  | 6.6  |
| D13418 | transcription factor HES-3                                                                                                            | 22.9  | 13.4 |
| D13518 | GATA-binding protein 1 (globin transcription factor 1)                                                                                | 18.7  | 13.8 |
| D13555 | CD3 antigen, zeta polypeptide                                                                                                         | 14.4  | 10.4 |
| D13556 | T cell receptor eta chain                                                                                                             | 29.1  | 13.9 |
| D13667 | serine:pyruvate/alanine:glyoxylate aminotransferase precursor                                                                         | 3.5   | 2.2  |
| D13871 | solute carrier family 2, member 5                                                                                                     | 4.8   | 1    |
| D13906 | aquaporin 2                                                                                                                           | 23.6  | 7    |
| D13906 | aquaporin 2                                                                                                                           | 10.4  | 8.8  |
| D13907 | mitochondrial processing peptidase beta                                                                                               | 20.7  | 18.9 |
| D13907 | mitochondrial processing peptidase beta                                                                                               | 18.6  | 10.9 |
| D13912 | cytochrome P450, subfamily 3A, polypeptide 3                                                                                          | 3.2   | 2.6  |
| D13921 | acetyl-coenzyme A acetyltransferase 1                                                                                                 | 14.7  | 16.5 |
| D13927 | chloride channel K1                                                                                                                   | 13.8  | 10   |
| D13927 | chloride channel K1                                                                                                                   | 8.4   | 3.6  |
| D13962 | solute carrier family 2, member 2                                                                                                     | 51.8  | 31.3 |
| D13962 | solute carrier family 2, member 2                                                                                                     | 7.9   | 8    |
| D13963 | glutamate receptor, metabotropic 6                                                                                                    | 17.8  | 14.1 |
| D13965 | insulin receptor-related receptor                                                                                                     | 5.9   | 3.8  |
| D13978 | argininosuccinate lyase                                                                                                               | 31.5  | 16.2 |
| D13985 | chloride channel, nucleotide-sensitive, 1A                                                                                            | 37.7  | 17.1 |
| D13985 | chloride channel, nucleotide-sensitive, 1A                                                                                            | 16.2  | 9.3  |
| D14013 | cyclin C                                                                                                                              | 7.2   | 4.2  |
| D14015 | cyclin E                                                                                                                              | 27.1  | 12.1 |
| D14029 | hairy and enhancer of split 2 (Drosophila)                                                                                            | 6.4   | 4.7  |
| D14045 | topoisomerase (DNA) 2 alpha                                                                                                           | 9.6   | 7.4  |
| D14046 | topoisomerase II beta                                                                                                                 | 24    | 23.6 |
| D14076 | testicular dynamin                                                                                                                    | 4     | 2    |
| D14097 | aldosterone synthase                                                                                                                  | 7.8   | 3.8  |
| D14419 | protein phosphatase 2 (formerly 2A), regulatory subunit B (PR 52), alpha isoform                                                      | 17.3  | 8.8  |
| D14421 | protein phosphatase 2 (formerly 2A), regulatory subunit B (PR 52), beta isoform                                                       | 15.9  | 13   |
| D14437 | Calponin 1                                                                                                                            | 25    | 16   |
| D14441 | brain acidic membrane protein                                                                                                         | 32.1  | 10.8 |
| D14447 | Max                                                                                                                                   | 1     | 0.4  |
| D14448 | Max                                                                                                                                   | 5.7   | 3.9  |
| D14478 | calpain 8                                                                                                                             | 18    | 14   |
| D14480 | calpain 8                                                                                                                             | 11.4  | 15.5 |
| D14564 | L-gulono-gamma-lactone oxidase                                                                                                        | 14.2  | 13.1 |
| D14568 | protein phosphatase 3, regulatory subunit B, alpha isoform, type 1                                                                    | 18.5  | 6.5  |
| D14591 | mitogen activated protein kinase kinase 1                                                                                             | 38    | 23.8 |
| D14819 | neural visinin-like Ca2+-binding protein type 2                                                                                       | 42.5  | 21.8 |
| D14819 | neural visinin-like Ca2+-binding protein type 2                                                                                       | 29.3  | 14   |
| D14839 | fibroblast growth factor 9                                                                                                            | 10.5  | 9    |
| D14869 | prostaglandin E receptor 3                                                                                                            | 18.2  | 20.2 |
| D14908 | adenylate cyclase activating polypeptide 1 receptor 1                                                                                 | 14.9  | 13.9 |
| D14909 | adenylate cyclase activating polypeptide 1 receptor 1                                                                                 | 6.2   | 6.8  |
| D14987 | sulfotransferase, hydroxysteroid preferring 2                                                                                         | 17.9  | 12.6 |
| D14988 | sulfotransferase, hydroxysteroid preferring 2                                                                                         | 13.6  | 9.4  |
| D14989 | Rattus norvegicus mRNA for hydroxysteroid sulfotransferase subunit, complete cds                                                      | 5.3   | 6.5  |
| D15069 | adrenomedullin                                                                                                                        | 20.8  | 15.2 |
| D16101 | solute carrier family 5, member 1                                                                                                     | 26.5  | 19.3 |
| D16237 | cell division cycle 25B                                                                                                               | 50.6  | 28.4 |
| D16308 | cyclin D2                                                                                                                             | 12    | 11.9 |
| D16309 | Cyclin D3                                                                                                                             | 33.7  | 12.8 |
| D16339 | alpha-tocopherol transfer protein                                                                                                     | 12.4  | 9.3  |
| D16349 | opioid receptor, mu 1                                                                                                                 | 25.7  | 15.7 |
| D16443 | prostaglandin E receptor 3                                                                                                            | 33.8  | 25.8 |
| D16443 | prostaglandin E receptor 3                                                                                                            | 6.4   | 1.8  |
| D16478 | hydroxyacyl-Coenzyme A dehydrogenase/3-ketoacyl-Coenzyme A thiolase/enoyl-Coenzyme A hydratase (trifunctional protein), alpha subunit | 137.8 | 74.3 |
| D16478 | hydroxyacyl-Coenzyme A dehydrogenase/3-ketoacyl-Coenzyme A thiolase/enoyl-Coenzyme A hydratase (trifunctional protein), alpha subunit | 50.5  | 19.7 |
| D16479 | hydroxyacyl-Coenzyme A dehydrogenase/3-ketoacyl-Coenzyme A thiolase/enoyl-Coenzyme A hydratase (trifunctional protein), beta subunit  | 15.7  | 16.4 |
| D16817 | metabotropic glutamate receptor mGluR7                                                                                                | 19.2  | 8.2  |
| D16817 | metabotropic glutamate receptor mGluR7                                                                                                | 6.2   | 5.6  |
| D16840 | ngiotensin II type 2 receptor                                                                                                         | 5.4   | 5.7  |
| D17309 | aldo-keto reductase family 1, member D1 (delta 4-3-ketosteroid-5-beta-reductase)                                                      | 6.1   | 2.7  |
| D17310 | 3-alpha-hydroxysteroid dehydrogenase                                                                                                  | 22.2  | 11.7 |
| D17352 | low Mr GTP-binding protein                                                                                                            | 11    | 11.7 |
| D17370 | CTL target antigen                                                                                                                    | 13.6  | 10.9 |
| D17370 | CTL target antigen                                                                                                                    | 6.2   | 5.6  |
| D17445 | Tyrosine 3-monooxygenase/tryptophan 5-monooxygenase activation protein, eta polypeptide                                               | 133.7 | 50   |
| D17469 | Thyrotropin releasing hormone receptor                                                                                                | 9     | 8.9  |
| D17512 | cysteine-rich protein 2                                                                                                               | 27.8  | 16.2 |
| D17521 | protein kinase C-regulated chloride channel,                                                                                          | 15.8  | 15.6 |
| D17695 | aquaporin 3                                                                                                                           | 14.4  | 9.7  |
| D17764 | synuclein, beta                                                                                                                       | 4.9   | 4.5  |

|        |                                                                    |      |      |
|--------|--------------------------------------------------------------------|------|------|
| D17809 | beta-4N-acetylgalactosaminyltransferase                            | 19.7 | 14.1 |
| D21095 | cytokine-induced neutrophil chemoattractant-2                      | 2.6  | 2.3  |
| D21103 | chorionic somatomammotropin hormone 1                              | 8.8  | 6.6  |
| D21132 | phosphatidylinositol transfer protein, beta                        | 31.7 | 15.4 |
| D21158 | Thromboxane receptor                                               | 8.2  | 4    |
| D21215 | coagulation factor 10                                              | 4.8  | 3.4  |
| D21869 | phosphofructokinase, muscle                                        | 27.4 | 18   |
| D23676 | regenerating islet-derived 3 alpha                                 | 1.8  | 0.5  |
| D25233 | Retinoblastoma 1 (including osteosarcoma)                          | 10.8 | 10   |
| D25233 | Retinoblastoma 1 (including osteosarcoma)                          | 8    | 12.3 |
| D25233 | Retinoblastoma 1 (including osteosarcoma)                          | 1.6  | 1.2  |
| D25290 | cadherin 6                                                         | 13.5 | 7.3  |
| D25543 | golgi-associated protein GCP360                                    | 18.1 | 18.8 |
| D25543 | golgi-associated protein GCP360                                    | 13.9 | 8.5  |
| D26073 | phosphoribosylpyrophosphate synthetase-associated protein (39 kDa) | 33.4 | 13.4 |
| D26073 | phosphoribosylpyrophosphate synthetase-associated protein (39 kDa) | 2.9  | 1.3  |
| D26111 | chloride channel K1-like                                           | 3.5  | 1.7  |
| D26112 | Fas antigen                                                        | 1.5  | 0.5  |
| D26154 | RB109 (brain specific protein)                                     | 34.8 | 6.7  |
| D26154 | RB109 (brain specific protein)                                     | 2.1  | 0.9  |
| D26178 | intestinal cell kinase                                             | 22.1 | 11.7 |
| D26180 | protein kinase C-like 1                                            | 14.3 | 10.8 |
| D26307 | Jun D proto-oncogene                                               | 7.7  | 1.8  |
| D26492 | dynein, axonemal, heavy polypeptide 1                              | 3.2  | 2    |
| D26493 | dynein-like protein 2,                                             | 3.2  | 1.7  |
| D26495 | dynein, cytoplasmic, heavy chain 2                                 | 1.9  | 1    |
| D26496 | dynein-like protein 5                                              | 6.8  | 7    |
| D26497 | dynein, axonemal, heavy polypeptide 6                              | 5.5  | 2.5  |
| D26498 | dynein, axonemal, heavy polypeptide 7                              | 36   | 24.8 |
| D26499 | dynein-like protein 8                                              | 17.7 | 11.7 |
| D26500 | dynein, axonemal, heavy polypeptide 9                              | 23.1 | 24.6 |
| D26500 | dynein, axonemal, heavy polypeptide 9                              | 2.8  | 1.8  |
| D26503 | dynein, axon, heavy chain 11                                       | 5.4  | 6.8  |
| D26564 | cell division cycle 37 homolog (S. cerevisiae)                     | 13.8 | 9.5  |
| D28110 | myelin-associated oligodendrocytic basic protein                   | 11.1 | 8.8  |
| D28110 | myelin-associated oligodendrocytic basic protein                   | 5.6  | 3.1  |
| D28111 | myelin-associated oligodendrocytic basic protein                   | 9.3  | 12.7 |
| D28111 | myelin-associated oligodendrocytic basic protein                   | 7.3  | 8.9  |
| D28339 | 3-hydroxyanthranilate 3,4-dioxygenase                              | 37.4 | 8.3  |
| D28498 | FMS-like tyrosine kinase 1                                         | 15.4 | 5.9  |
| D28508 | Janus kinase 3, protein-tyrosine kinase                            | 17.1 | 11.8 |
| D28512 | Synaptotagmin 3                                                    | 39.8 | 11.8 |
| D28557 | cold shock domain protein A                                        | 38.5 | 16.6 |
| D28560 | ectonucleotide pyrophosphatase/phosphodiesterase 2                 | 17.6 | 10.8 |
| D28560 | ectonucleotide pyrophosphatase/phosphodiesterase 2                 | 4    | 3.1  |
| D28561 | solute carrier family 2 , member 4                                 | 19.2 | 17.2 |
| D28562 | solute carrier family 2, member 5                                  | 4.4  | 1.7  |
| D28581 | Prostaglandin F receptor                                           | 8.2  | 11.6 |
| D28753 | cyclin dependent kinase 2-alpha                                    | 4.7  | 5    |
| D28754 | cyclin dependent kinase 2-beta                                     | 6.9  | 10.3 |
| D28860 | prostaglandin E receptor 4 (subtype EP4)                           | 8.8  | 7.4  |
| D28966 | prostacyclin receptor                                              | 75   | 44.1 |
| D29646 | CD38 antigen                                                       | 19.6 | 16.2 |
| D29683 | endothelin converting enzyme 1                                     | 40.8 | 21.6 |
| D29766 | v-crk-associated tyrosine kinase substrate                         | 2.7  | 0.6  |
| D29766 | v-crk-associated tyrosine kinase substrate                         | 75.7 | 61.3 |
| D29769 | bone morphogenetic protein 7                                       | 9    | 4.6  |
| D29960 | heat shock 20-kDa protein                                          | 13.4 | 9.3  |
| D30040 | v-akt murine thymoma viral oncogene homolog 1                      | 48.2 | 26.1 |
| D30041 | Murine thymoma viral (v-akt) oncogene homolog 2                    | 19.8 | 11.5 |
| D30647 | acyl-Coenzyme A dehydrogenase, very long chain                     | 14.5 | 17.5 |
| D30649 | alkaline phosphodiesterase                                         | 8.5  | 6.1  |
| D30734 | Ras GTPase-activating protein                                      | 15.3 | 17.1 |
| D30735 | growth factor, erv1 -like                                          | 4.5  | 4.5  |
| D30781 | phospholipase A2 receptor                                          | 3.6  | 1.8  |
| D30804 | proteasome subunit RC6-1                                           | 96.5 | 55.7 |
| D30804 | proteasome subunit RC6-1                                           | 56.3 | 45.2 |
| D31662 | regucalcin                                                         | 7.9  | 6.9  |
| D31734 | Distal-less homeobox                                               | 12.2 | 9.8  |
| D31734 | Distal-less homeobox                                               | 3.9  | 4.4  |
| D31838 | wee1 tyrosine kinase                                               | 12.7 | 6.8  |
| D31854 | Subtilisin - like endoprotease                                     | 13.5 | 12.5 |
| D31873 | LIM motif-containing protein kinase 1                              | 12.9 | 8.5  |
| D31874 | LIM motif-containing protein kinase 2                              | 27.4 | 5    |
| D31962 | RhoGAP                                                             | 5.6  | 7.9  |
| D31962 | RhoGAP                                                             | 4.7  | 3.5  |
| D32080 | Thromboxane receptor                                               | 25.9 | 20.9 |
| D32207 | thrombopoietin                                                     | 6.5  | 4.5  |
| D32209 | acidic nuclear phosphoprotein 32 family, member A                  | 5.8  | 1.5  |



|        |                                                                                           |       |      |
|--------|-------------------------------------------------------------------------------------------|-------|------|
| D32249 | protein carrying the RING-H2 sequence motif                                               | 38    | 32   |
| D37880 | TYRO3 protein tyrosine kinase 3                                                           | 27.9  | 23.3 |
| D37884 | choline kinase R                                                                          | 18.3  | 20.4 |
| D37934 | 5E5 antigen                                                                               | 6.7   | 8.3  |
| D37951 | human immunodeficiency virus type 1 enhancer-binding protein 2                            | 10.2  | 8.9  |
| D37951 | human immunodeficiency virus type 1 enhancer-binding protein 2                            | 6.6   | 4    |
| D38035 | Thyroid transcription factor 1 TTF-1 NK-2 (Drosophila) homolog A (thyroid nuclear factor) | 4.6   | 2.9  |
| D38036 | Truncated TSH receptor                                                                    | 27    | 25.2 |
| D38036 | Truncated TSH receptor                                                                    | 7.5   | 8.3  |
| D38056 | ephrin A1                                                                                 | 3.6   | 2    |
| D38061 | UDP glucuronosyltransferase, exon 1                                                       | 16.6  | 14   |
| D38062 | UDP glucuronosyltransferase, exon 1                                                       | 35.2  | 22.9 |
| D38063 | UDP glucuronosyltransferase, exon 1                                                       | 1.7   | 0.8  |
| D38065 | UDP glucuronosyltransferase, exon 1                                                       | 7.4   | 3.2  |
| D38066 | UDP glucuronosyltransferase, exon 1                                                       | 3.1   | 1.7  |
| D38067 | UDP glucuronosyltransferase, exon 1                                                       | 15.9  | 19.4 |
| D38069 | UDP glucuronosyltransferase, exon 1                                                       | 6.2   | 2.2  |
| D38072 | protein tyrosine phosphatase, non-receptor type 12                                        | 12.1  | 5.1  |
| D38101 | calcium channel, voltage-dependent, L type, alpha 1D subunit                              | 10.3  | 6.9  |
| D38222 | protein tyrosine phosphatase, receptor type, N                                            | 26.3  | 18.1 |
| D38381 | cytochrome P450, 3a18                                                                     | 10.5  | 11.3 |
| D38448 | diacylglycerol kinase, gamma                                                              | 2.5   | 1.4  |
| D38450 | putative G protein coupled receptor                                                       | 54.2  | 42.4 |
| D38468 | protein tyrosine phosphatase, non-receptor type substrate 1                               | 95.5  | 38.5 |
| D38492 | contactin 1                                                                               | 10.3  | 7.2  |
| D38494 | gamma-aminobutyric acid A receptor, rho 2                                                 | 3.7   | 1    |
| D38629 | Adenomatosis polyposis coli                                                               | 3.9   | 1.8  |
| D42012 | major histocompatibility complex class II H-alpha gene                                    | 11    | 5.3  |
| D42019 | major histocompatibility complex class II H-alpha gene                                    | 10.2  | 7.8  |
| D42117 | Tumor necrosis factor superfamily, member 8                                               | 23.3  | 16.3 |
| D42145 | potassium inwardly-rectifying channel, subfamily J, member 8                              | 18.3  | 14.4 |
| D42148 | growth arrest specific 6                                                                  | 47.3  | 26.5 |
| D42156 | nuclear receptor subfamily 5, group A, member 1                                           | 6.1   | 0.6  |
| D43623 | carnitine palmitoyltransferase 1b                                                         | 27.2  | 15.3 |
| D43623 | carnitine palmitoyltransferase 1b                                                         | 11    | 8.1  |
| D43778 | angiotensin II type 2 receptor,                                                           | 19.4  | 12.3 |
| D43964 | bile acid-Coenzyme A: amino acid N-acyltransferase                                        | 8.2   | 3.9  |
| D44481 | avian sarcoma virus CT10 (v-crk) oncogene homolog                                         | 3.9   | 0.8  |
| D44494 | 3-hydroxyanthranilate 3,4-dioxygenase                                                     | 18.1  | 3.4  |
| D44591 | nitric oxide synthase 2                                                                   | 2.3   | 0.5  |
| D45199 | gastric intrinsic factor                                                                  | 22.9  | 9.7  |
| D45201 | Neurofibromatosis type 1                                                                  | 21    | 16.5 |
| D45240 | MHC class II gene (RT1.DOa)                                                               | 125.1 | 83.1 |
| D45252 | 2,3-oxidosqualene: lanosterol cyclase                                                     | 27.8  | 12.8 |
| D45254 | cellular nucleic acid binding protein                                                     | 12.2  | 5.1  |
| D45255 | Sialyltransferase 8a                                                                      | 18.4  | 11.9 |
| D45413 | brain-enriched membrane-associated protein tyrosine BEM-2                                 | 3.8   | 1.9  |
| D45862 | leptin                                                                                    | 27.1  | 12.6 |
| D45862 | leptin                                                                                    | 14.6  | 7    |
| D45920 | 130kDa-Ins(1,4,5)P3 binding protein                                                       | 2.8   | 1    |
| D49363 | heat-responsive protein 12                                                                | 21.1  | 18.1 |
| D49395 | 5-hydroxytryptamine (serotonin) receptor 3a                                               | 5.3   | 3.5  |
| D49446 | TFIID subunit p80                                                                         | 112.9 | 50.5 |
| D49494 | prepro bone inducing protein                                                              | 31.7  | 16.4 |
| D49494 | prepro bone inducing protein                                                              | 8.6   | 7.4  |
| D49494 | prepro bone inducing protein                                                              | 2.5   | 1.5  |
| D49653 | leptin                                                                                    | 244.8 | 60.2 |
| D49708 | splicing factor, arginine/serine-rich (transformer 2 Drosophila homolog) 10               | 21.4  | 12.5 |
| D49785 | mitogen activated protein kinase kinase kinase 12                                         | 10.5  | 7.1  |
| D49836 | thymoma viral proto-oncogene 3                                                            | 12.2  | 11.1 |
| D49955 | bone marrow stromal cell antigen 1                                                        | 13.5  | 9.1  |
| D49980 | mutT (E. coli) human homolog (8-oxo-dGTPase)                                              | 4.4   | 2.6  |
| D50093 | prion protein                                                                             | 14.1  | 8.8  |
| D50497 | Chloride channel 5                                                                        | 8.5   | 6.8  |
| D50558 | CD86 antigen                                                                              | 46    | 24.2 |
| D50564 | mercaptopyruvate sulfurtransferase                                                        | 8.7   | 4.7  |
| D50568 | proteoglycan 2, bone marrow                                                               | 3.1   | 1.3  |
| D50580 | phenobarbital-inducible carboxylesterase (liver)                                          | 8.8   | 11.3 |
| D50608 | Cholecystokinin A receptor                                                                | 7.3   | 4.3  |
| D50664 | solute carrier family 15 (oligopeptide transporter), member 1                             | 17.1  | 8.6  |
| D50671 | GABA receptor rho-3 subunit                                                               | 5.1   | 4.9  |
| D55648 | T-cell receptor gamma chain                                                               | 6.7   | 5.2  |
| D63673 | peroxisomal biogenesis factor 6                                                           | 27.2  | 12.1 |
| D63673 | peroxisomal biogenesis factor 6                                                           | 24.2  | 7.6  |
| D63704 | dihydropyrimidinase                                                                       | 46.6  | 28.7 |
| D63704 | dihydropyrimidinase                                                                       | 12.2  | 7.7  |
| D63761 | adrenodoxin reductase                                                                     | 17    | 11.2 |
| D63772 | solute carrier family 1, member 1                                                         | 19.9  | 6.8  |
| D63774 | keratin 14                                                                                | 20    | 8.5  |

|        |                                                                                      |      |      |
|--------|--------------------------------------------------------------------------------------|------|------|
| D63834 | solute carrier family 16, member 1                                                   | 21.5 | 12.3 |
| D63860 | Bone morphogenetic protein 3                                                         | 10   | 7    |
| D63886 | matrix metalloproteinase 16                                                          | 9.8  | 13.1 |
| D64045 | Phosphoinositide 3-kinase, regulatory subunit, polypeptide 1 (p85 alpha)             | 6.7  | 9.1  |
| D64046 | phosphatidylinositol 3-kinase, regulatory subunit, polypeptide 2                     | 5.8  | 4.8  |
| D64046 | phosphatidylinositol 3-kinase, regulatory subunit, polypeptide 2                     | 1    | 0.3  |
| D64047 | phosphatidylinositol 3-kinase p55 subunit                                            | 22.1 | 13.5 |
| D64050 | protein tyrosine phosphatase, receptor type, R                                       | 8.7  | 12   |
| D64059 | alpha thalassemia/mental retardation syndrome X-linked (RAD54 homolog, S.cerevisiae) | 12.2 | 6.1  |
| D64060 | DNA (cytosine-5-)-methyltransferase 1                                                | 21.5 | 2.6  |
| D64061 | annexin V-binding protein (ABP-7)                                                    | 66   | 24.2 |
| D64062 | annexin V-binding protein ABP-10                                                     | 27.2 | 21.7 |
| D64085 | fibroblast growth factor FGF-5                                                       | 8.4  | 5.8  |
| D64085 | fibroblast growth factor FGF-5                                                       | 7.9  | 10.9 |
| D67071 | regucalcin,                                                                          | 17.5 | 16   |
| D70817 | complexin 1                                                                          | 32.3 | 21.5 |
| D78159 | Rattus norvegicus mRNA for keratin 6, 3'UTR sequence                                 | 3    | 1.2  |
| D78303 | splicing factor YT521-B                                                              | 23   | 10.6 |
| D78359 | sushi-repeat-containing protein                                                      | 13.8 | 8.5  |
| D78591 | cardiotrophin 1                                                                      | 36.8 | 21.2 |
| D78610 | Protein tyrosine phosphatase, receptor type, epsilon polypeptide                     | 23.7 | 12.9 |
| D79215 | fibroblast growth factor 10                                                          | 8.4  | 5.4  |
| D79221 | vesicle transport-related                                                            | 9.1  | 6.8  |
| D79981 | kidney specific organic anion transporter                                            | 3.8  | 2.5  |
| D82074 | neurogenic differentiation 1                                                         | 19.2 | 6.7  |
| D82074 | neurogenic differentiation 1                                                         | 2.4  | 1.2  |
| D82868 | neurogenic differentiation 2                                                         | 9    | 4.8  |
| D82883 | solute carrier family 26 (sulfate transporter), member 2                             | 9.9  | 7.6  |
| D83036 | homeo box, msh-like 1                                                                | 19.7 | 7.6  |
| D83044 | solute carrier family 22, member 2                                                   | 22.6 | 11.7 |
| D83231 | trefoil factor 1                                                                     | 6.5  | 2.2  |
| D83348 | cadherin 22                                                                          | 5.9  | 2.7  |
| D83349 | cadherin 22                                                                          | 8.2  | 3.2  |
| D83538 | phosphatidylinositol 4-kinase                                                        | 14.1 | 11.3 |
| D83538 | phosphatidylinositol 4-kinase                                                        | 6.4  | 3.8  |
| D83598 | ATP-binding cassette, sub-family C (CFTR/MRP), member 9                              | 61.3 | 59.9 |
| D83661 | nitric oxide synthase 2                                                              | 21.2 | 15.1 |
| D83697 | BH3 interacting domain 3                                                             | 14   | 10.6 |
| D83792 | cyclin-dependent kinase inhibitor 1B                                                 | 7.1  | 7.8  |
| D83948 | RNA binding motif protein 10                                                         | 24.5 | 16.3 |
| D84336 | delta-like homolog (Drosophila)                                                      | 42.6 | 13.2 |
| D84346 | NCK-associated protein 1                                                             | 14.9 | 8.7  |
| D84418 | high mobility group box 2                                                            | 3.2  | 1.9  |
| D84482 | Rat PMSG-induced ovarian mRNA, 3'sequence, N4                                        | 33.6 | 16.5 |
| D84484 | Rat PMSG-induced ovarian mRNA, 3'sequence, N7                                        | 8.2  | 8    |
| D84485 | Rat PMSG-induced ovarian mRNA, 3'sequence, N3                                        | 51.1 | 30.2 |
| D84486 | PMSG-induced ovarian                                                                 | 1.9  | 1.3  |
| D84487 | splicing factor 3b, subunit 1, 155kD                                                 | 14   | 7.5  |
| D84667 | phosphatidylinositol 4-kinase                                                        | 28.9 | 11.3 |
| D84667 | phosphatidylinositol 4-kinase                                                        | 9.7  | 8.1  |
| D85035 | dihydropyrimidine dehydrogenase                                                      | 9.4  | 13.6 |
| D85100 | solute carrier family 27 (fatty acid transporter), member 32                         | 26.3 | 12.3 |
| D85435 | PKC-delta binding protein                                                            | 10.7 | 7.1  |
| D85435 | PKC-delta binding protein                                                            | 2.3  | 0.6  |
| D85844 | rabaptin 5                                                                           | 74.7 | 13.5 |
| D86039 | potassium inwardly rectifying channel, subfamily J, member 11                        | 17.3 | 6.3  |
| D86039 | potassium inwardly rectifying channel, subfamily J, member 11                        | 12.3 | 2.9  |
| D86041 | N-G,N-G-dimethylarginine dimethylaminohydrolase,                                     | 38.9 | 6.7  |
| D86086 | ATP-binding cassette, sub-family C (CFTR/MRP), member 2                              | 5.4  | 1.8  |
| D86297 | aminolevulinic acid synthase 2                                                       | 47.6 | 16.9 |
| D86345 | leukemia inhibitor factor receptor alpha-chain                                       | 5.8  | 5.4  |
| D86556 | pregnancy upregulated non-ubiquitously expressed CaM kinase                          | 42.9 | 22.3 |
| D86557 | calcium/calmodulin-dependent protein kinase IG                                       | 18.6 | 11.9 |
| D86580 | nuclear receptor subfamily 0, group B, member 2                                      | 24.6 | 9.6  |
| D86581 | chordin                                                                              | 12.1 | 10.9 |
| D86642 | FK506 binding protein 1b                                                             | 7.7  | 5.2  |
| D86711 | Transcribed sequences                                                                | 81.2 | 28   |
| D86742 | cadherin 4, type 1, R-cadherin (retinal)                                             | 5.1  | 6    |
| D86745 | small heterodimer partner homologue, exon 1                                          | 42.7 | 17.3 |
| D86745 | small heterodimer partner homologue, exon 1                                          | 17.5 | 12.2 |
| D87212 | contactin 5                                                                          | 7    | 7    |
| D87240 | 6-phosphofructo-2-kinase/fructose-2,6-biphosphatase 3                                | 29.2 | 13.1 |
| D87248 | contactin 6                                                                          | 5.3  | 6.2  |
| D87336 | bleomycin hydrolase                                                                  | 46.4 | 27.8 |
| D87515 | aminopeptidase B                                                                     | 3.8  | 1.6  |
| D87748 | Unc4.1 homeobox (C. elegans)                                                         | 4.6  | 4.4  |
| D87839 | 4-aminobutyrate aminotransferase                                                     | 8.4  | 7    |
| D87839 | 4-aminobutyrate aminotransferase                                                     | 6.9  | 4.1  |
| D87919 | interferon, beta 1                                                                   | 7.9  | 5.9  |

|        |                                                                                                                                   |      |      |
|--------|-----------------------------------------------------------------------------------------------------------------------------------|------|------|
| D87922 | skeletal muscle sodium channel                                                                                                    | 4.1  | 1.7  |
| D87991 | UDP-galactose transporter related isozyme 1                                                                                       | 13.2 | 13.3 |
| D88034 | peptidyl arginine deiminase, type 3                                                                                               | 95   | 47   |
| D88034 | peptidyl arginine deiminase, type 3                                                                                               | 16.1 | 8.4  |
| D88035 | beta-1,3-glucuronyltransferase 1 (glucuronosyltransferase P)                                                                      | 31.7 | 17.4 |
| D88190 | serine threonine kinase 39 (STE20/SPS1 homolog, yeast)                                                                            | 32.3 | 18.8 |
| D88250 | complement component 1, s subcomponent                                                                                            | 8.4  | 8.7  |
| D88461 | N-WASP                                                                                                                            | 12.8 | 9.2  |
| D88534 | Pancreatic lipase                                                                                                                 | 21.3 | 6.4  |
| D88586 | eosinophil cationic protein                                                                                                       | 43.4 | 19.7 |
| D88666 | phosphatidylserine-specific phospholipase A1                                                                                      | 7.4  | 2.6  |
| D88672 | phospholipase D gene 2                                                                                                            | 20.8 | 12.6 |
| D88751 | prostaglandin E receptor 1                                                                                                        | 2.5  | 0.6  |
| D88890 | brain acyl-CoA hydrolase                                                                                                          | 67.8 | 31   |
| D89069 | carbonyl reductase 1                                                                                                              | 36.2 | 19.1 |
| D89070 | carbonyl reductase 1                                                                                                              | 34.3 | 30.6 |
| D89093 | phosphodiesterase 5A, cGMP-specific                                                                                               | 7.6  | 3.6  |
| D89375 | dopa/tyrosine sulfotransferase                                                                                                    | 15.9 | 13.1 |
| D89730 | T16 mRNA                                                                                                                          | 5    | 2.9  |
| D89730 | T16 mRNA                                                                                                                          | 2.5  | 1.8  |
| D89731 | serine/threonine kinase 12                                                                                                        | 10.9 | 8.7  |
| D89863 | Muscle and microspikes RAS                                                                                                        | 36.8 | 12.9 |
| D89863 | Muscle and microspikes RAS                                                                                                        | 23.4 | 18.2 |
| D89965 | mRNA for RSS                                                                                                                      | 8.2  | 6.6  |
| D89983 | ornithine decarboxylase antizyme inhibitor                                                                                        | 5.8  | 1.7  |
| D90038 | ATP-binding cassette, sub-family D (ALD), member 3                                                                                | 15.8 | 6    |
| D90048 | Na+, K+ -ATPase                                                                                                                   | 32   | 14.8 |
| D90048 | Na+, K+ -ATPase                                                                                                                   | 13.3 | 20.8 |
| D90049 | Na+, K+ -ATPase                                                                                                                   | 60   | 31.8 |
| D90102 | hepatocyte growth factor                                                                                                          | 12.3 | 13.2 |
| D90109 | fatty acid Coenzyme A ligase, long chain 2                                                                                        | 14.8 | 9.6  |
| D90219 | natriuretic peptide precursor C                                                                                                   | 13.6 | 13.3 |
| E00001 | pro-insulin                                                                                                                       | 18.3 | 9.4  |
| E00001 | insulin 1                                                                                                                         | 7.3  | 4.1  |
| E00002 | RGH(rat growth hormone)                                                                                                           | 4.1  | 2.1  |
| E00593 | polypeptide having immunoglobulin E binding factor activity                                                                       | 2.9  | 2.1  |
| E00594 | polypeptide having immunoglobulin E binding factor activity                                                                       | 12.8 | 17.6 |
| E00698 | natriuretic peptide precursor type A                                                                                              | 4.8  | 4.4  |
| E00775 | natriuretic peptide precursor type A                                                                                              | 8.9  | 6.8  |
| E00778 | cytochrome P450, 1a1                                                                                                              | 3.9  | 1.9  |
| E00903 | natriuretic peptide precursor type A                                                                                              | 93.1 | 64.9 |
| E00988 | Insulin-like growth factor II (somatomedin A)                                                                                     | 9.7  | 1    |
| E01050 | serine pirwvate aminotransferase                                                                                                  | 39.5 | 29.3 |
| E01050 | serine pirwvate aminotransferase                                                                                                  | 39.1 | 17.7 |
| E01184 | Chimera cytochrome P-450 MC gene substituted the C terminal region containing HR2 region for the same region of cytochrome P-450d | 7.7  | 7.5  |
| E01415 | glutathione S transferase                                                                                                         | 31   | 21.5 |
| E01780 | TGF-alpha                                                                                                                         | 9.3  | 8.3  |
| E01983 | regeneration protein, lithostatin, pancreatic stone protein                                                                       | 7.9  | 6.2  |
| E02223 | endotheline                                                                                                                       | 9.5  | 5.8  |
| E02468 | tumor necrosis factor superfamily, member 2                                                                                       | 8.2  | 4.3  |
| E03082 | neurotrophin-3 (HDNF/NT-3)                                                                                                        | 10.7 | 7.7  |
| E03166 | prolactin                                                                                                                         | 3.5  | 3.9  |
| E03190 | hepatocyte growth factor                                                                                                          | 13   | 9.8  |
| E03229 | cytosolic cysteine dioxygenase 1                                                                                                  | 31.9 | 20.2 |
| E03344 | peroxisomal membrane protein 3                                                                                                    | 1.7  | 0.9  |
| E03424 | GTP cyclohydrolase 1                                                                                                              | 11.5 | 8.9  |
| E03428 | rat peptidylglycin-alpha-amidating monooxygenase                                                                                  | 44.6 | 29.4 |
| E04009 | natriuretic peptide precursor C                                                                                                   | 5.6  | 3.3  |
| E04128 | secretin receptor                                                                                                                 | 9.9  | 13.8 |
| E04239 | choline kinase                                                                                                                    | 3.7  | 2.8  |
| E05489 | Interleukin 1 alpha                                                                                                               | 18.8 | 10.2 |
| E05551 | vasoactive intestinal polypeptide                                                                                                 | 11.9 | 11.5 |
| E08874 | opioid receptor, kappa 1                                                                                                          | 4    | 3.9  |
| E12181 | thrombopoietin                                                                                                                    | 32.9 | 19.4 |
| E12275 | oxidosqualene lanosterol-cyclase                                                                                                  | 3.3  | 1.2  |
| E12365 | CNK1 cDNA,a homolog of Saccharomyces cerevisiae CDC7                                                                              | 5    | 1.9  |
| E12625 | sterol-C4-methyl oxidase-like                                                                                                     | 3.9  | 1.5  |
| E12742 | cholecystokinin-A receptor gene,exon 1                                                                                            | 16.6 | 14.4 |
| E12743 | cholecystokinin-A receptor gene,exon 2                                                                                            | 26.7 | 15   |
| E12746 | cholecystokinin-A receptor gene                                                                                                   | 4.5  | 1.3  |
| E12829 | TBP-interacting protein 120A                                                                                                      | 12.9 | 12.6 |
| E13541 | chondroitin sulfate proteoglycan 5                                                                                                | 19.4 | 8.9  |
| E13557 | GADII                                                                                                                             | 54.3 | 20.7 |
| E13573 | BH3 interacting domain 3                                                                                                          | 17.3 | 17.8 |
| E13644 | protein carrying the RING-H2 sequence motif                                                                                       | 5.5  | 5.7  |
| E13732 | macrophage inflammatory protein-1 alpha receptor gene                                                                             | 24.3 | 7.8  |
| E13890 | YT521 gene                                                                                                                        | 23.1 | 29.4 |
| E13935 | phospholipase                                                                                                                     | 26.5 | 28.1 |

|        |                                                                                                                                                                                                                      |       |       |
|--------|----------------------------------------------------------------------------------------------------------------------------------------------------------------------------------------------------------------------|-------|-------|
| H31078 | Transcribed sequences                                                                                                                                                                                                | 34.4  | 14.2  |
| H31118 | Transcribed sequence with moderate similarity to protein pir:I60307 (E. coli) I60307 beta-galactosidase, alpha peptide - Escherichia coli                                                                            | 25.1  | 24.1  |
| H31128 | Transcribed sequences                                                                                                                                                                                                | 51.8  | 19.1  |
| H31144 | Transcribed sequence with strong similarity to protein ref:NP_058068.1 (M.musculus) tyrosine kinase, non-receptor, 2; Cdc42 GTPase-inhibiting protein; P21cdc42Hs kinase; activated p21cdc42Hs kinase [Mus musculus] | 15.6  | 7.5   |
| H31144 | Transcribed sequence with strong similarity to protein ref:NP_058068.1 (M.musculus) tyrosine kinase, non-receptor, 2; Cdc42 GTPase-inhibiting protein; P21cdc42Hs kinase; activated p21cdc42Hs kinase [Mus musculus] | 14.5  | 7.3   |
| H31232 | cytochrome c oxidase, subunit 4b                                                                                                                                                                                     | 281.2 | 272.8 |
| H31236 | Transcribed sequence with weak similarity to protein ref:NP_112263.1 (R.norvegicus) ubiquitin-conjugating enzyme E2D 2 [Rattus norvegicus]                                                                           | 15    | 9.8   |
| H31287 | kinase                                                                                                                                                                                                               | 25.8  | 32.4  |
| H31287 | kinase                                                                                                                                                                                                               | 10.6  | 7.4   |
| H31313 | selenoprotein P, plasma, 1                                                                                                                                                                                           | 23.9  | 16.1  |
| H31323 | Transcribed sequences                                                                                                                                                                                                | 10.8  | 5.8   |
| H31342 | Transcribed sequences                                                                                                                                                                                                | 16.8  | 12.7  |
| H31351 | Transcribed sequences                                                                                                                                                                                                | 51.8  | 19.7  |
| H31363 | Transcribed sequences                                                                                                                                                                                                | 9.7   | 2.7   |
| H31411 | Transcribed sequences                                                                                                                                                                                                | 15.8  | 4.5   |
| H31456 | Transcribed sequences                                                                                                                                                                                                | 27.5  | 12.8  |
| H31479 | Transcribed sequences                                                                                                                                                                                                | 6.2   | 6.4   |
| H31489 | Transcribed sequence with strong similarity to protein ref:NP_080203.1 (M.musculus) mitochondrial ribosomal protein L45 [Mus musculus]                                                                               | 40.8  | 22.1  |
| H31535 | Transcribed sequences                                                                                                                                                                                                | 76.6  | 16.9  |
| H31550 | Transcribed sequence with strong similarity to protein ref:NP_031781.1 (M.musculus) cytoplasmic polyadenylation element binding protein [Mus musculus]                                                               | 22.3  | 13.7  |
| H31554 | Transcribed sequences                                                                                                                                                                                                | 11.7  | 13.6  |
| H31588 | Transcribed sequence with strong similarity to protein ref:NP_076373.1 (M.musculus) Ral-A exchange factor RalGPS2 [Mus musculus]                                                                                     | 14.5  | 9.8   |
| H31590 | Transcribed sequences                                                                                                                                                                                                | 20.4  | 12.6  |
| H31597 | prepro-Neuropeptide W polypeptide                                                                                                                                                                                    | 19.4  | 9.6   |
| H31604 | Transcribed sequence with strong similarity to protein ref:NP_033903.1 (M.musculus) budding uninhibited by benzimidazoles 1 homolog, beta (S. cerevisiae) [Mus musculus]                                             | 9.1   | 5.8   |
| H31610 | Transcribed sequence with strong similarity to protein pir:JW0059 (M.musculus) JW0059 mtprd protein - mouse                                                                                                          | 14.2  | 13.8  |
| H31623 | Serine/threonine kinase 2                                                                                                                                                                                            | 5.6   | 4.6   |
| H31625 | Transcribed sequence with strong similarity to protein ref:NP_116281.1 (H.sapiens) hypothetical protein MGC14161 [Homo sapiens]                                                                                      | 14.2  | 10.8  |
| H31648 | Transcribed sequence                                                                                                                                                                                                 | 9.7   | 9.6   |
| H31665 | Transcribed sequences                                                                                                                                                                                                | 9.6   | 8.6   |
| H31692 | GERp95                                                                                                                                                                                                               | 15.2  | 8.8   |
| H31707 | Transcribed sequence with weak similarity to protein pir:T50621 (H.sapiens) T50621 hypothetical protein DKFZp762O076.1 - human (fragment)                                                                            | 150.8 | 41    |
| H31711 | Transcribed sequence with moderate similarity to protein ref:NP_075066.1 (H.sapiens) hypothetical protein FLJ12701 [Homo sapiens]                                                                                    | 12.2  | 5.6   |
| H31722 | Transcribed sequences                                                                                                                                                                                                | 87.8  | 43.7  |
| H31724 | Transcribed sequences                                                                                                                                                                                                | 23.6  | 18.2  |
| H31734 | Transcribed sequence                                                                                                                                                                                                 | 20.7  | 21    |
| H31747 | Transcribed sequences                                                                                                                                                                                                | 14    | 4.7   |
| H31750 | Transcribed sequence with weak similarity to protein ref:NP_444360.1 (M.musculus) protocadherin beta 5 [Mus musculus]                                                                                                | 6.9   | 3.6   |
| H31753 | Transcribed sequences                                                                                                                                                                                                | 4.8   | 5.4   |
| H31802 | Transcribed sequence with moderate similarity to protein pir:S12207 (M.musculus) S12207 hypothetical protein (B2 element) - mouse                                                                                    | 26.6  | 8.3   |
| H31813 | Transcribed sequence with strong similarity to protein pir:T14781 (H.sapiens) T14781 hypothetical protein DKFZp586B1621.1 - human (fragment)                                                                         | 11.4  | 5.5   |
| H31839 | BCL2-antagonist/killer 1                                                                                                                                                                                             | 44.7  | 17.5  |
| H31842 | Transcribed sequence with weak similarity to protein pir:B48013 (R.norvegicus) B48013 proline-rich proteoglycan 2 precursor, parotid - rat                                                                           | 19.6  | 12.3  |
| H31859 | Transcribed sequences                                                                                                                                                                                                | 10.3  | 7.6   |
| H31887 | Transcribed sequence with strong similarity to protein ref:NP_080367.1 (M.musculus) RIKEN cDNA 1700037H04 [Mus musculus]                                                                                             | 99.3  | 70.3  |
| H31897 | Transcribed sequences                                                                                                                                                                                                | 8.5   | 8.5   |
| H31907 | embryo-related protein                                                                                                                                                                                               | 16.5  | 15.1  |
| H31914 | Nucleolin                                                                                                                                                                                                            | 8.5   | 7.1   |
| H31922 | Transcribed sequence with strong similarity to protein ref:NP_077752.1 (M.musculus) UBX domain-containing 2 [Mus musculus]                                                                                           | 17.9  | 14.9  |
| H31955 | Transcribed sequences                                                                                                                                                                                                | 11.4  | 7.8   |
| H31964 | Transcribed sequences                                                                                                                                                                                                | 36.7  | 30.3  |
| H31976 | Transcribed sequence with strong similarity to protein ref:NP_060563.1 (H.sapiens) hypothetical protein FLJ10439 [Homo sapiens]                                                                                      | 44.5  | 17.1  |
| H31982 | Transcribed sequences                                                                                                                                                                                                | 11.9  | 8.6   |
| H31990 | Transcribed sequences                                                                                                                                                                                                | 8     | 9.1   |
| H32966 | Transcribed sequence with strong similarity to protein pir:I61512 (M.musculus) I61512 TNF receptor associated factor 2 - mouse                                                                                       | 7.9   | 2.8   |
| H33001 | Rattus norvegicus mud-2 mRNA, 5' UTR                                                                                                                                                                                 | 63.3  | 42.8  |

|        |                                                                                                                                                                                                                              |       |      |
|--------|------------------------------------------------------------------------------------------------------------------------------------------------------------------------------------------------------------------------------|-------|------|
| H33003 | Transcribed sequence with weak similarity to protein pir:JC1241 (R.norvegicus) JC1241 beta-interferon-induced protein - rat                                                                                                  | 32    | 36.6 |
| H33075 | Transcribed sequences                                                                                                                                                                                                        | 8     | 5.5  |
| H33084 | Transcribed sequences                                                                                                                                                                                                        | 53.3  | 27.6 |
| H33086 | Transcribed sequences                                                                                                                                                                                                        | 35.6  | 17   |
| H33093 | Transcribed sequences                                                                                                                                                                                                        | 13.6  | 13.7 |
| H33140 | Transcribed sequences                                                                                                                                                                                                        | 17.9  | 17.1 |
| H33205 | Transcribed sequences                                                                                                                                                                                                        | 4.4   | 2.9  |
| H33253 | Transcribed sequences                                                                                                                                                                                                        | 4.7   | 4.4  |
| H33255 | Transcribed sequence with strong similarity to protein ref:NP_032769.1 (M.musculus) nth (endonuclease III)-like 1 (E.coli); thymine glycol DNA glycosylase/AP lyase [Mus musculus]                                           | 13.7  | 7.7  |
| H33294 | Transcribed sequences                                                                                                                                                                                                        | 20.2  | 8.4  |
| H33301 | Transcribed sequence                                                                                                                                                                                                         | 38    | 27.5 |
| H33426 | Transcribed sequence with moderate similarity to protein ref:NP_008949.1 (H.sapiens) centrosomal protein 1; centriole associated protein [Homo sapiens]                                                                      | 17.1  | 6.7  |
| H33426 | Transcribed sequence with moderate similarity to protein ref:NP_008949.1 (H.sapiens) centrosomal protein 1; centriole associated protein [Homo sapiens]                                                                      | 4.3   | 2.2  |
| H33448 | Transcribed sequences                                                                                                                                                                                                        | 10.8  | 6.7  |
| H33459 | Transcribed sequence with strong similarity to protein ref:NP_035548.1 (M.musculus) SWI/SNF related, matrix associated, actin dependent regulator of chromatin, subfamily b, member 1; integrase interactor 1 [Mus musculus] | 65.3  | 24.4 |
| H33459 | Transcribed sequence with strong similarity to protein ref:NP_035548.1 (M.musculus) SWI/SNF related, matrix associated, actin dependent regulator of chromatin, subfamily b, member 1; integrase interactor 1 [Mus musculus] | 22.1  | 14.2 |
| H33461 | oxidation resistance 1                                                                                                                                                                                                       | 8.8   | 9.9  |
| H33467 | Transcribed sequences                                                                                                                                                                                                        | 10.3  | 8.9  |
| H33472 | Transcribed sequence                                                                                                                                                                                                         | 3.3   | 1.5  |
| H33486 | Transcribed sequence with moderate similarity to protein ref:NP_060551.1 (H.sapiens) hypothetical protein FLJ10385 [Homo sapiens]                                                                                            | 14.4  | 9.7  |
| H33516 | Transcribed sequences                                                                                                                                                                                                        | 1.8   | 0.4  |
| H33528 | Transcribed sequences                                                                                                                                                                                                        | 15.5  | 11.3 |
| H33544 | Transcribed sequences                                                                                                                                                                                                        | 21.8  | 12.6 |
| H33560 | Transcribed sequences                                                                                                                                                                                                        | 8     | 3.5  |
| H33566 | Transcribed sequences                                                                                                                                                                                                        | 3.1   | 1.4  |
| H33577 | Transcribed sequence with strong similarity to protein ref:NP_075635.1 (M.musculus) RAN binding protein 17 [Mus musculus]                                                                                                    | 16.9  | 12.2 |
| H33614 | Transcribed sequences                                                                                                                                                                                                        | 17.3  | 7.4  |
| H33619 | Transcribed sequences                                                                                                                                                                                                        | 19.8  | 15.4 |
| H33636 | Transcribed sequences                                                                                                                                                                                                        | 10.3  | 9.3  |
| H33654 | Transcribed sequences                                                                                                                                                                                                        | 7.5   | 3.1  |
| H33656 | Transcribed sequences                                                                                                                                                                                                        | 50.9  | 39   |
| H33660 | Transcribed sequences                                                                                                                                                                                                        | 12.6  | 7    |
| H33723 | Transcribed sequence                                                                                                                                                                                                         | 32.8  | 24.6 |
| H33725 | associated molecule with the SH3 domain of STAM                                                                                                                                                                              | 14    | 7.2  |
| H33747 | Transcribed sequences                                                                                                                                                                                                        | 9.5   | 6    |
| H33750 | Transcribed sequence with weak similarity to protein sp:P29147 (R.norvegicus) BDH_RAT D-beta-hydroxybutyrate dehydrogenase, mitochondrial precursor (BDH) (3-hydroxybutyrate dehydrogenase)                                  | 26.8  | 8.4  |
| J00692 | skeletal muscle alpha-actin                                                                                                                                                                                                  | 9.5   | 3.8  |
| J00710 | Casein, alpha                                                                                                                                                                                                                | 15.5  | 10.5 |
| J00711 | casein beta                                                                                                                                                                                                                  | 5.1   | 5.4  |
| J00712 | casein gamma                                                                                                                                                                                                                 | 14.4  | 8.1  |
| J00713 | carboxypeptidase A1                                                                                                                                                                                                          | 29.5  | 19.1 |
| J00716 | crystallin, gamma E                                                                                                                                                                                                          | 9.7   | 10.8 |
| J00717 | crystallin, gamma C                                                                                                                                                                                                          | 2     | 0.5  |
| J00728 | cytochrome P450, 2b19                                                                                                                                                                                                        | 16.9  | 15.8 |
| J00735 | Fibrinogen, gamma polypeptide                                                                                                                                                                                                | 35.7  | 15.2 |
| J00735 | Fibrinogen, gamma polypeptide                                                                                                                                                                                                | 7.7   | 10.5 |
| J00738 | alpha-2u globulin PGCL4                                                                                                                                                                                                      | 12.4  | 7.5  |
| J00739 | gonadotropin-releasing hormone receptor                                                                                                                                                                                      | 15.7  | 11.2 |
| J00741 | Rat ig delta heavy chain constant region and 3' ut, mrna                                                                                                                                                                     | 3.1   | 1.8  |
| J00758 | Nerve growth factor, gamma polypeptide                                                                                                                                                                                       | 10.4  | 10.8 |
| J00771 | ribonuclease, RNase A family, 1                                                                                                                                                                                              | 28.6  | 17.3 |
| J00772 | Prostatic steroid-binding protein 1                                                                                                                                                                                          | 2.2   | 0.4  |
| J00774 | prostatic steroid-binding protein chain C1-like                                                                                                                                                                              | 9.2   | 12   |
| J00776 | prostatic steroid-binding protein C2                                                                                                                                                                                         | 8.9   | 7.3  |
| J00777 | Prostatic steroid-binding protein 1                                                                                                                                                                                          | 9.4   | 8.2  |
| J00778 | pancreatic trypsin 1                                                                                                                                                                                                         | 10.1  | 8    |
| J00780 | relaxin 1                                                                                                                                                                                                                    | 15.1  | 10.4 |
| J00791 | seminal vesicle protein 4                                                                                                                                                                                                    | 8     | 7.4  |
| J00801 | whey acidic protein                                                                                                                                                                                                          | 8.7   | 9    |
| J01878 | Rat brain-specific identifier sequence RNA, clone p1b224                                                                                                                                                                     | 50    | 22.3 |
| J01879 | Rat brain-specific identifier sequence RNA, clone p2a120                                                                                                                                                                     | 2.1   | 0.5  |
| J02585 | stearoyl-Coenzyme A desaturase 1                                                                                                                                                                                             | 5     | 1    |
| J02589 | UDP glycosyltransferase 2 family, polypeptide B                                                                                                                                                                              | 13.7  | 10.1 |
| J02592 | Glutathione-S-transferase, mu type 2 (Yb2)                                                                                                                                                                                   | 25.5  | 13.5 |
| J02596 | apolipoprotein C-III                                                                                                                                                                                                         | 105.6 | 28.2 |
| J02596 | apolipoprotein C-III                                                                                                                                                                                                         | 6.6   | 6.7  |
| J02597 | apolipoprotein A-I                                                                                                                                                                                                           | 39.8  | 20.1 |
| J02643 | sulfotransferase, hydroxysteroid preferring 2                                                                                                                                                                                | 5.8   | 6.9  |

|        |                                                                                                   |       |       |
|--------|---------------------------------------------------------------------------------------------------|-------|-------|
| J02649 | ATPase, H+/K+ transporting, alpha polypeptide                                                     | 35.3  | 13.5  |
| J02657 | Cytochrome P450, subfamily IIC (mephenytoin 4-hydroxylase)                                        | 15.3  | 9.8   |
| J02669 | Cytochrome P450 IIA1 (hepatic steroid hydroxylase IIA1) gene                                      | 34.7  | 13    |
| J02675 | spermine binding protein                                                                          | 5.6   | 4.7   |
| J02705 | Oncomodulin                                                                                       | 17.3  | 10.3  |
| J02720 | arginase 1                                                                                        | 3.3   | 1.5   |
| J02749 | acetyl-Coenzyme A acyltransferase 1 (peroxisomal 3-oxoacyl-Coenzyme A thiolase)                   | 23.6  | 18.4  |
| J02752 | acyl-coA oxidase                                                                                  | 62.6  | 41.2  |
| J02773 | fatty acid binding protein 3                                                                      | 38.8  | 27.6  |
| J02776 | DNA polymerase beta                                                                               | 7.5   | 5.9   |
| J02791 | acetyl-coenzyme A dehydrogenase, medium chain                                                     | 10.3  | 11.9  |
| J02810 | glutathione S-transferase, mu 1                                                                   | 113.9 | 41.1  |
| J02827 | branched chain keto acid dehydrogenase subunit E1, alpha polypeptide                              | 22.4  | 11.3  |
| J02827 | branched chain keto acid dehydrogenase subunit E1, alpha polypeptide                              | 7.3   | 2.3   |
| J02852 | Cytochrome P450, subfamily IIA (phenobarbital-inducible)/ (Cytochrome P450 IIA3)                  | 15.2  | 7.8   |
| J02852 | Cytochrome P450, subfamily IIA (phenobarbital-inducible)/ (Cytochrome P450 IIA3)                  | 2     | 0.7   |
| J02861 | cytochrome P450 2c13                                                                              | 19.1  | 10.3  |
| J02942 | calcium/calmodulin-dependent protein kinase II alpha subunit                                      | 4.7   | 3.9   |
| J03024 | adrenergic receptor, beta 2                                                                       | 12.3  | 9.9   |
| J03025 | muscarinic receptor m2                                                                            | 8.3   | 6.7   |
| J03093 | odorant-binding protein 1F                                                                        | 4.1   | 1.6   |
| J03170 | transcription factor 1                                                                            | 53.5  | 23.2  |
| J03179 | D site albumin promoter binding protein                                                           | 22.7  | 17.2  |
| J03179 | D site albumin promoter binding protein                                                           | 19.1  | 23.2  |
| J03190 | aminolevulinic acid synthase 1                                                                    | 14.8  | 13.1  |
| J03190 | aminolevulinic acid synthase 1                                                                    | 10.4  | 7.7   |
| J03481 | quinoid dihydropteridine reductase                                                                | 24.6  | 9     |
| J03481 | quinoid dihydropteridine reductase                                                                | 8.6   | 6.7   |
| J03524 | alpha(1)-inhibitor 3, variant I                                                                   | 17    | 13.6  |
| J03577 | gastric intrinsic factor                                                                          | 10.4  | 7.9   |
| J03588 | Guanidinoacetate methyltransferase                                                                | 35.6  | 22.4  |
| J03624 | galanin                                                                                           | 7.4   | 6.9   |
| J03637 | aldehyde dehydrogenase family 3, member A1                                                        | 46.3  | 17.1  |
| J03754 | ATPase, Ca++ transporting, plasma membrane 2                                                      | 6.4   | 4.6   |
| J03773 | Guanine nucleotide binding protein, alpha                                                         | 9.5   | 10.5  |
| J03786 | Cytochrom P450 15-beta gene                                                                       | 11.1  | 9.1   |
| J03806 | Phospholipase C, gamma 1                                                                          | 34.3  | 15.1  |
| J03808 | acetyl-coenzyme A carboxylase                                                                     | 7.8   | 6.1   |
| J03819 | Thyroid hormone receptor, beta (avian erythroblastic leukemia viral (v-erb-a) oncogene homolog 2) | 1.3   | 0.7   |
| J03863 | serine dehydratase                                                                                | 24.3  | 7.9   |
| J03865 | serine dehydratase                                                                                | 9.2   | 2.6   |
| J03867 | diaphorase 1                                                                                      | 57.6  | 11.2  |
| J03959 | urate oxidase                                                                                     | 20.9  | 12.6  |
| J03959 | urate oxidase                                                                                     | 4     | 5.1   |
| J03960 | arachidonate 5-lipoxygenase                                                                       | 3.6   | 3.2   |
| J04024 | ATPase, Ca++ transporting, cardiac muscle, slow twitch 2                                          | 15    | 19.2  |
| J04035 | elastin                                                                                           | 26.8  | 17.9  |
| J04063 | calcium/calmodulin-dependent protein kinase (CaM kinase) II gamma                                 | 5.3   | 6.7   |
| J04147 | vitamin D receptor                                                                                | 36.9  | 21.2  |
| J04171 | glutamate oxaloacetate transaminase 1                                                             | 19.9  | 20.1  |
| J04187 | cytochrome P450, subfamily 2A, polypeptide 1                                                      | 57.3  | 12.4  |
| J04197 | 6-phosphofructo-2-kinase/fructose-2,6-biphosphatase 1                                             | 7.7   | 5.7   |
| J04206 | cystatin S                                                                                        | 10.1  | 7.5   |
| J04215 | integrin binding sialoprotein                                                                     | 5.8   | 5.4   |
| J04423 | ---                                                                                               | 61.5  | 38.6  |
| J04423 | ---                                                                                               | 9.7   | 7.3   |
| J04423 | ---                                                                                               | 4.8   | 2.3   |
| J04423 | ---                                                                                               | 4.2   | 1.7   |
| J04423 | ---                                                                                               | 3.9   | 3.3   |
| J04423 | ---                                                                                               | 44.5  | 10.1  |
| J04486 | Insulin-like growth factor binding protein 2                                                      | 14.9  | 13.4  |
| J04488 | Prostaglandin D synthase                                                                          | 14.2  | 8.3   |
| J04503 | Protein phosphatase type 1A (formely 2C), Mg-dependent, alpha isoform                             | 16.7  | 9.9   |
| J04526 | Hexokinase 1                                                                                      | 9.9   | 6.1   |
| J04526 | Hexokinase 1                                                                                      | 9     | 3.5   |
| J04526 | Hexokinase 1                                                                                      | 7.3   | 4.5   |
| J04532 | protein kinase C, zeta                                                                            | 2.2   | 0.4   |
| J04563 | Phosphodiesterase 4B, cAMP-specific (dunce (Drosophila)-homolog phosphodiesterase E4)             | 6.1   | 3.6   |
| J04591 | Dipeptidyl peptidase 4                                                                            | 36.7  | 26.3  |
| J04629 | ATPase, Na+/K+ transporting, beta 2 polypeptide                                                   | 39.7  | 21.1  |
| J04636 | cholinergic receptor, nicotinic, beta polypeptide 3                                               | 4.9   | 4.3   |
| J04731 | potassium voltage-gated channel, shaker-related subfamily, member 2                               | 3.2   | 4.5   |
| J04791 | ornithine decarboxylase 1                                                                         | 9     | 5.3   |
| J04792 | ornithine decarboxylase 1                                                                         | 14.4  | 14.8  |
| J04807 | insulin 2                                                                                         | 94.7  | 31.1  |
| J04807 | insulin 2                                                                                         | 4.5   | 4.4   |
| J04963 | carcinoembryonic antigen-related cell adhesion molecule 1                                         | 16.8  | 18.2  |
| J04993 | Troponin I, slow isoform                                                                          | 13.6  | 10    |
| J05022 | peptidyl arginine deiminase, type 2                                                               | 155.8 | 104.9 |

|        |                                                                    |       |      |
|--------|--------------------------------------------------------------------|-------|------|
| J05030 | short chain acyl-coenzyme A dehydrogenase                          | 29.4  | 24.1 |
| J05031 | Isovaleryl Coenzyme A dehydrogenase                                | 25.3  | 14.9 |
| J05031 | Isovaleryl Coenzyme A dehydrogenase                                | 8.6   | 4.9  |
| J05035 | steroid 5 alpha-reductase 1                                        | 39.3  | 13.8 |
| J05035 | steroid 5 alpha-reductase 1                                        | 16.4  | 16.7 |
| J05072 | calcium/calmodulin-dependent protein kinase II, delta              | 12.5  | 9.9  |
| J05087 | ATPase, Ca++ transporting, plasma membrane 3                       | 14.1  | 7    |
| J05121 | calpain 3                                                          | 7.5   | 8    |
| J05122 | Benzodiazepin receptor (peripheral)                                | 44.6  | 15.6 |
| J05155 | phospholipase C, gamma 2                                           | 28.8  | 15.1 |
| J05156 | cytochrome P450, subfamily 11A                                     | 20.3  | 10.3 |
| J05166 | solute carrier family 4, member 2                                  | 43.2  | 10.2 |
| J05166 | solute carrier family 4, member 2                                  | 13.9  | 12.5 |
| J05167 | solute carrier family 4, member 3                                  | 9.3   | 5.1  |
| J05181 | glutamate-cysteine ligase catalytic subunit                        | 12.3  | 13.4 |
| J05189 | tachikin receptor 3                                                | 10.4  | 8.4  |
| J05210 | ATP citrate lyase                                                  | 19.1  | 15.2 |
| J05231 | cholinergic receptor, nicotinic, alpha polypeptide 5               | 14.5  | 13.7 |
| J05276 | 5-hydroxytryptamine (serotonin) receptor 1A                        | 13.8  | 9.7  |
| J05405 | heme oxygenase 2                                                   | 30.6  | 29.3 |
| J05443 | Seminal vesicle protein, secretion 2                               | 4.2   | 1.9  |
| J05446 | Glycogen synthase 2 (liver)                                        | 11    | 13.1 |
| J05460 | cytochrome P450, 7a1                                               | 4.9   | 3.2  |
| J05470 | Carnitine palmitoyltransferase 2                                   | 15.3  | 8.7  |
| J05490 | SMR2                                                               | 9.7   | 8.6  |
| J05495 | macrophage galactose N-acetyl-galactosamine specific lectin        | 3.6   | 1.5  |
| J05499 | liver mitochondrial glutaminase                                    | 3.7   | 2.9  |
| J05509 | cytochrome P450, 7a1                                               | 8     | 6.6  |
| J05510 | inositol 1,4,5-triphosphate receptor 1                             | 13    | 6.5  |
| J05519 | C1-tetrahydrofolate synthase                                       | 19.6  | 10.5 |
| J05571 | methionine adenosyltransferase II, alpha                           | 27.8  | 10.1 |
| J05592 | protein phosphatase 1, regulatory (inhibitor) subunit 1A           | 8.5   | 6    |
| J05592 | protein phosphatase 1, regulatory (inhibitor) subunit 1A           | 7.1   | 4.2  |
| J05677 | natriuretic peptide receptor 1                                     | 73.2  | 9.7  |
| K00136 | glutathione-S-transferase, alpha type2                             | 5.9   | 4.3  |
| K00512 | Myelin basic protein                                               | 12.9  | 15.1 |
| K00994 | calbindin 3                                                        | 7.6   | 3.5  |
| K00996 | cytochrome P450, 2b19                                              | 105.8 | 51.6 |
| K01180 | Fatty acid binding protein 2                                       | 4.7   | 4.1  |
| K01231 | alpha1-fetoprotein                                                 | 3.6   | 4.3  |
| K01391 | ---                                                                | 4.6   | 5.4  |
| K01391 | ---                                                                | 1.7   | 1.5  |
| K01391 | ---                                                                | 3     | 2.3  |
| K01676 | Rat brain-specific identifier sequence (ID), clone p1B308          | 2.8   | 1.1  |
| K01677 | eukaryotic initiation factor 5 (eIF-5)                             | 33.8  | 20.4 |
| K01701 | oxcytocin                                                          | 15.4  | 9.2  |
| K01721 | cytochrome P450, 2b19                                              | 55.1  | 63.8 |
| K01878 | Proopiomelanocortin, beta (endorphin, beta)                        | 10.6  | 8    |
| K01933 | Haptoglobin                                                        | 27.6  | 16.3 |
| K01934 | thyroid hormone responsive SPOT14 homolog (Rattus)                 | 9.3   | 9.5  |
| K02111 | myosin, heavy polypeptide 8, skeletal muscle, perinatal            | 11.6  | 3.3  |
| K02207 | ---                                                                | 8.2   | 5.6  |
| K02247 | proline-rich proteoglycan 1                                        | 4.6   | 1.8  |
| K02248 | somatostatin                                                       | 3.7   | 1.2  |
| K02423 | fast myosin alkali light chain                                     | 34.1  | 16.9 |
| K02598 | casein kappa                                                       | 42    | 24.5 |
| K02813 | glucagon                                                           | 6.7   | 6.3  |
| K02814 | T-kininogen                                                        | 21.9  | 12.1 |
| K02814 | T-kininogen                                                        | 5     | 4.2  |
| K02815 | butyrophilin-like 2 (MHC class II associated)                      | 91.3  | 38.3 |
| K02817 | asialoglycoprotein receptor 1                                      | 4.3   | 5.3  |
| K03039 | thymocyte L-CA                                                     | 13.4  | 12.6 |
| K03041 | Ornithine carbamoyltransferase                                     | 6     | 4.9  |
| K03045 | retinol-binding protein                                            | 9.5   | 4.1  |
| K03045 | retinol-binding protein                                            | 6.3   | 2.3  |
| K03241 | cytochrome P-450d                                                  | 1.1   | 0.5  |
| K03242 | Myelin protein zero (Charcot-Marie-Tooth neuropathy 1B)            | 3.3   | 1.4  |
| K03243 | phosphoenolpyruvate carboxykinase (GTP)                            | 3.8   | 1.8  |
| K03249 | enoyl-Coenzyme A, hydratase/3-hydroxyacyl Coenzyme A dehydrogenase | 2.2   | 1.1  |
| K03467 | myosin, heavy polypeptide 3                                        | 5.6   | 2.8  |
| K03468 | myosin, heavy polypeptide 3                                        | 8.4   | 4.4  |
| K03486 | protein kinase C, beta 1                                           | 32    | 18.2 |
| L00088 | fast myosin alkali light chain                                     | 4.6   | 4.3  |
| L00111 | calcitonin/calcitonin-related polypeptide, alpha                   | 26.6  | 15.7 |
| L00117 | Elastase 1                                                         | 8     | 6.3  |
| L00124 | elastase 2                                                         | 28.8  | 18.6 |
| L00131 | pancreatic trypsinogen II mRNA                                     | 4.1   | 6.4  |
| L00191 | Fibronectin 1                                                      | 59.4  | 8    |
| L00320 | cytochrome P450, 2b19                                              | 25.8  | 22.8 |

|        |                                                                                                                                                                |       |      |
|--------|----------------------------------------------------------------------------------------------------------------------------------------------------------------|-------|------|
| L00370 | myosin, heavy polypeptide 3                                                                                                                                    | 17    | 13.7 |
| L00382 | skeletal muscle beta-tropomyosin and fibroblast tropomyosin 1                                                                                                  | 1.6   | 0.5  |
| L00603 | soluble carrier family 18, member 2                                                                                                                            | 7.8   | 6.8  |
| L00981 | lymphotoxin (TNF-beta                                                                                                                                          | 27.5  | 11.9 |
| L01115 | adenylyl cyclase 6                                                                                                                                             | 11    | 9.1  |
| L01267 | general transcription factor IIF, polypeptide 2 (30kD subunit)                                                                                                 | 23.8  | 23.3 |
| L01507 | POU domain, class 1, transcription factor 1                                                                                                                    | 3.3   | 3.1  |
| L01702 | Protein tyrosine phosphatase, receptor type, A                                                                                                                 | 17.2  | 6.8  |
| L01793 | glycogenin                                                                                                                                                     | 34.3  | 18.5 |
| L02121 | cyclin-dependent kinase 5                                                                                                                                      | 10.8  | 9.5  |
| L02315 | calcium channel beta 4 subunit                                                                                                                                 | 12.1  | 7.8  |
| L02530 | frizzled homolog 2 (Drosophila)                                                                                                                                | 3.6   | 3.9  |
| L02615 | protein kinase inhibitor, alpha                                                                                                                                | 22.2  | 14.3 |
| L02634 | cGMP-gated rod photoreceptor channel related                                                                                                                   | 9.3   | 4.7  |
| L02842 | follicle stimulating hormone receptor                                                                                                                          | 32.5  | 16.9 |
| L02842 | follicle stimulating hormone receptor                                                                                                                          | 8.1   | 3.8  |
| L02915 | somatostatin receptor 1                                                                                                                                        | 4     | 2.6  |
| L02915 | somatostatin receptor 1                                                                                                                                        | 2.6   | 1.3  |
| L02926 | Interleukin 10                                                                                                                                                 | 21.6  | 15.4 |
| L03382 | phospholamban                                                                                                                                                  | 11.1  | 11.2 |
| L03386 | Olf-1/EBF associated Zn finger protein Roaz                                                                                                                    | 5.4   | 5.9  |
| L03556 | homeo box A5                                                                                                                                                   | 3.9   | 0.9  |
| L03557 | Homeobox gene A4                                                                                                                                               | 16.4  | 13.4 |
| L04535 | somatostatin receptor 5                                                                                                                                        | 8.1   | 7.7  |
| L04619 | 25-hydroxyvitamin D3 24-hydroxylase                                                                                                                            | 7.9   | 6.5  |
| L04635 | lactase phlorizin hydrolase                                                                                                                                    | 15.4  | 12.3 |
| L04672 | adrenomedullin receptor                                                                                                                                        | 61    | 60.8 |
| L04684 | calcium channel, voltage-dependent, L type, alpha 1S subunit                                                                                                   | 5.6   | 2.1  |
| L04739 | ATPase, Ca++ transporting, plasma membrane 1                                                                                                                   | 7.6   | 6.3  |
| L04760 | ADP-ribosylation factor domain protein 1, 64kD                                                                                                                 | 11.9  | 11.8 |
| L05175 | lymphocyte Met-ase 1                                                                                                                                           | 17.1  | 10.5 |
| L05435 | synaptic vesicle glycoprotein 2 a                                                                                                                              | 17.5  | 12.7 |
| L05489 | diphtheria toxin receptor                                                                                                                                      | 11.4  | 5.7  |
| L05541 | Transcribed sequence with strong similarity to protein pir:A56685 (R.norvegicus) A56685 UDPglucose--hexose-1-phosphate uridylyltransferase (EC 2.7.7.12) - rat | 12.3  | 5.3  |
| L05557 | plasma membrane calcium ATPase isoform 2                                                                                                                       | 26.7  | 13.5 |
| L05557 | plasma membrane calcium ATPase isoform 2                                                                                                                       | 24    | 23.6 |
| L05596 | 5-hydroxytryptamine (serotonin) receptor 1F                                                                                                                    | 2.3   | 0.9  |
| L06040 | arachidonate 12-lipoxygenase                                                                                                                                   | 2.6   | 0.6  |
| L06096 | inositol 1, 4, 5-triphosphate receptor 3                                                                                                                       | 105.2 | 33.7 |
| L06096 | inositol 1, 4, 5-triphosphate receptor 3                                                                                                                       | 50.6  | 12.5 |
| L06434 | Rattus rattus (clone ntt4r) neurotransmitter transporter mRNA sequence                                                                                         | 6.8   | 4.6  |
| L06441 | decidual/trophoblast prolactin-related protein                                                                                                                 | 5.7   | 2.1  |
| L06482 | Retinoid X receptor alpha                                                                                                                                      | 7.5   | 3.2  |
| L06804 | LIM homeobox protein 2                                                                                                                                         | 3.4   | 1.6  |
| L06986 | Growth factor independent-1                                                                                                                                    | 7.4   | 8.7  |
| L07073 | adaptor-related protein complex AP-3, mu 1 subunit                                                                                                             | 13    | 11.9 |
| L07074 | adaptor-related protein complex 3, mu 2 subunit                                                                                                                | 35.4  | 17.5 |
| L07281 | Carboxypeptidase E                                                                                                                                             | 14.2  | 2    |
| L07315 | dipeptidase 1                                                                                                                                                  | 8.2   | 5.9  |
| L07318 | minimal change nephritis transmembrane glycoprotein                                                                                                            | 3.7   | 4    |
| L07380 | growth hormone-releasing factor receptor                                                                                                                       | 23.1  | 11   |
| L07398 | immunoglobulin rearranged gamma-chain                                                                                                                          | 74.8  | 32.6 |
| L07399 | immunoglobulin rearranged gamma-chain                                                                                                                          | 7.9   | 5.3  |
| L07400 | immunoglobulin rearranged gamma-chain mRNA variable (V) region                                                                                                 | 3.5   | 2.7  |
| L07400 | immunoglobulin rearranged gamma-chain mRNA variable (V) region                                                                                                 | 1.4   | 0.9  |
| L07401 | immunoglobulin rearranged gamma-chain mRNA variable (V) region                                                                                                 | 20.9  | 12.2 |
| L07402 | immunoglobulin rearranged gamma-chain mRNA variable (V) region                                                                                                 | 7     | 2.6  |
| L07407 | immunoglobulin rearranged kappa-chain mRNA variable (V) region                                                                                                 | 27.7  | 23.1 |
| L07408 | immunoglobulin rearranged kappa-chain mRNA variable (V) region                                                                                                 | 16.4  | 12.6 |
| L07409 | immunoglobulin rearranged kappa-chain mRNA variable (V) region                                                                                                 | 2.1   | 0.4  |
| L07410 | immunoglobulin rearranged kappa-chain mRNA variable (V) region                                                                                                 | 12.1  | 11.1 |
| L07736 | carnitine palmitoyltransferase 1                                                                                                                               | 33    | 18.6 |
| L08100 | Glycosylation dependent cell adhesion molecule 1                                                                                                               | 34.9  | 21   |
| L08134 | proline-rich glycoprotein (sgp158)                                                                                                                             | 19.7  | 7.5  |
| L08227 | cholinergic receptor, nicotinic, alpha polypeptide 6                                                                                                           | 27    | 12.3 |
| L08228 | N-methyl-D-aspartate receptor (NMDAR1) gene                                                                                                                    | 53.6  | 33.1 |
| L08490 | GABA-A receptor alpha-1 subunit gene                                                                                                                           | 24.6  | 13.3 |
| L08492 | GABA-A receptor alpha-3 subunit gene                                                                                                                           | 16.1  | 6.3  |
| L08493 | gamma-aminobutyric acid (GABA-A) receptor, subunit alpha 4                                                                                                     | 27.9  | 20.9 |
| L08494 | gamma-aminobutyric acid A receptor, alpha 5                                                                                                                    | 9.7   | 9.5  |
| L08496 | gamma-aminobutyric acid A receptor, delta                                                                                                                      | 25.8  | 15.4 |
| L08497 | GABA-A receptor gamma-2 subunit                                                                                                                                | 13.1  | 8.9  |
| L08505 | dynein, cytoplasmic, heavy chain 1                                                                                                                             | 29.2  | 23.7 |
| L08595 | nuclear receptor subfamily 4, group A, member 2                                                                                                                | 35.3  | 12.4 |
| L08812 | transcription factor EC                                                                                                                                        | 30.8  | 15.6 |
| L08814 | Structure specific recognition protein 1                                                                                                                       | 5.9   | 5.6  |
| L08831 | Glucose-dependent insulinotropic peptide                                                                                                                       | 1.2   | 0.5  |
| L09119 | neurogranin                                                                                                                                                    | 16.2  | 13.9 |



|        |                                                                                |      |      |
|--------|--------------------------------------------------------------------------------|------|------|
| L09119 | neurogranin                                                                    | 12.7 | 5.8  |
| L09216 | pancreatic lipase-related protein 2                                            | 9.9  | 4.4  |
| L09647 | hepatocyte nuclear factor 3, beta                                              | 4.4  | 3.5  |
| L09653 | transforming growth factor, beta receptor 2                                    | 37.7 | 16.9 |
| L09656 | Transcription factor 12                                                        | 15.1 | 10.1 |
| L10072 | 5-hydroxytryptamine (serotonin) receptor 5A                                    | 27.1 | 7.8  |
| L10073 | 5-hydroxytryptamine (serotonin) receptor 5B                                    | 23   | 12.6 |
| L10326 | GNAS complex locus                                                             | 44.6 | 52.1 |
| L10336 | Transcribed sequences                                                          | 21.3 | 16.3 |
| L10362 | synaptic vesicle glycoprotein 2 b                                              | 2.4  | 1    |
| L10640 | activin receptor IIB                                                           | 12   | 12.6 |
| L10669 | Phosphorylase, glycogen; muscle (McArdle syndrome)                             | 14.5 | 10.4 |
| L10669 | Phosphorylase, glycogen; muscle (McArdle syndrome)                             | 11.8 | 9.4  |
| L11025 | T-cell receptor alpha chain                                                    | 14.1 | 8.9  |
| L11035 | T-cell receptor alpha chain                                                    | 36   | 7.2  |
| L11035 | T-cell receptor alpha chain                                                    | 22.6 | 11   |
| L11236 | RATMATSTOM Rattus rattus mRNA sequence                                         | 24.1 | 19.3 |
| L11236 | solute carrier family 9, member 2                                              | 16.3 | 8.8  |
| L11319 | signal peptidase complex 18kD                                                  | 27.3 | 20.6 |
| L11694 | Phosphoglucomutase 1                                                           | 21   | 5.7  |
| L12016 | solute carrier family 25, member 1                                             | 50.7 | 20.3 |
| L12025 | tumor-associated antigen 1                                                     | 5.7  | 5.8  |
| L12138 | thymidylate synthase                                                           | 3.3  | 0.8  |
| L12381 | ADP-ribosylation factor 2                                                      | 12.2 | 6.1  |
| L12382 | ADP-ribosylation factor 3                                                      | 35.5 | 6.2  |
| L12407 | dopamine beta hydroxylase                                                      | 14.5 | 10.4 |
| L13025 | RATPOLYIM Rattus norvegicus (clone 2) mRNA sequence, 3' end GAA-triplet repeat | 15.5 | 17.2 |
| L13040 | calcitonin receptor                                                            | 12.6 | 19.9 |
| L13151 | RAS p21 protein activator 1                                                    | 21   | 6.8  |
| L13192 | forkhead box D1                                                                | 9.9  | 4.2  |
| L13192 | forkhead box D1                                                                | 8    | 9    |
| L13193 | forkhead box C2 (MFH-1, mesenchyme forkhead 1)                                 | 2.7  | 3.6  |
| L13201 | HNF-3/forkhead homolog-1                                                       | 23.2 | 2.9  |
| L13202 | forkhead box D3                                                                | 1.8  | 0.4  |
| L13205 | HNF-3/fork-head homolog-5 (HFH-5)                                              | 2.4  | 1.6  |
| L13206 | forkhead box D4                                                                | 2.5  | 0.4  |
| L13207 | forkhead box E3                                                                | 93   | 25.4 |
| L13235 | polymeric immunoglobulin receptor                                              | 10.3 | 9.6  |
| L13237 | polymeric immunoglobulin receptor                                              | 11   | 9.3  |
| L13406 | calcium/calmodulin-dependent protein kinase II, delta                          | 11.3 | 10.6 |
| L13407 | calcium/calmodulin-dependent protein kinase II, delta                          | 2.7  | 3    |
| L13445 | sialyltransferase 8 (alpha-2, 8-sialyltransferase) B                           | 9.2  | 7    |
| L13600 | glycine transporter 1                                                          | 33.3 | 17.3 |
| L13606 | myosin, heavy polypeptide 4                                                    | 8.4  | 14.7 |
| L13619 | growth response protein (CL-6)                                                 | 11.2 | 2.3  |
| L13619 | growth response protein (CL-6)                                                 | 5.6  | 5.1  |
| L13722 | Choroideremia                                                                  | 10.8 | 9.7  |
| L14001 | Polymeric immunoglobulin receptor                                              | 4.7  | 4.9  |
| L14002 | Polymeric immunoglobulin receptor                                              | 42   | 14.5 |
| L14003 | polymeric immunoglobulin receptor AATTAA-containing 3'UTR Group 1              | 7.4  | 6.5  |
| L14004 | Polymeric immunoglobulin receptor                                              | 10   | 11.5 |
| L14018 | Cartilage homeo protein 1                                                      | 12.3 | 4.4  |
| L14284 | N-acetylglucosaminyltransferase V                                              | 2.4  | 0.5  |
| L14322 | phospholipase C-beta1                                                          | 9.1  | 8.9  |
| L14441 | phosphatidylethanolamine N-methyltransferase                                   | 16.3 | 7.7  |
| L14462 | amino-terminal enhancer of split                                               | 77.7 | 43.8 |
| L14463 | Transducin-like enhancer of split 4, homolog of Drosophila E(spl)              | 25.3 | 11.3 |
| L14610 | transcription factor RZR-beta                                                  | 1.9  | 2.2  |
| L14680 | B-cell leukemia/lymphoma 2                                                     | 16.1 | 14.1 |
| L14680 | B-cell leukemia/lymphoma 2                                                     | 5.4  | 3.3  |
| L14684 | G elongation factor                                                            | 18.9 | 8.4  |
| L14776 | cathepsin J                                                                    | 7.2  | 8.2  |
| L14851 | neurexin 3                                                                     | 17   | 15.4 |
| L14936 | mitogen activated protein kinase kinase 2                                      | 40.7 | 26.6 |
| L14937 | proprotein convertase subtilisin/kexin type 4                                  | 18.2 | 13.9 |
| L14937 | proprotein convertase subtilisin/kexin type 4                                  | 2.2  | 0.8  |
| L14951 | lyn protein non-receptor kinase                                                | 18.1 | 7.5  |
| L15011 | cortixin                                                                       | 36.9 | 34.7 |
| L15079 | ATP-binding cassette, sub-family B (MDR/TAP), member 4                         | 30.7 | 14.3 |
| L15305 | Glial cell line derived neutrophilic factor                                    | 28   | 11.3 |
| L15453 | calcium channel, voltage-dependent, L type, alpha 1E subunit                   | 15.3 | 11.3 |
| L15556 | Phospholipase C , beta4                                                        | 6.9  | 7.2  |
| L15618 | casein kinase II, alpha 1 polypeptide                                          | 33.8 | 21.9 |
| L16532 | cyclic nucleotide phosphodiesterase 1                                          | 20   | 10.4 |
| L16764 | heat shock 70kD protein 1A                                                     | 17.8 | 8.3  |
| L16922 | Progesterone receptor                                                          | 10.4 | 5.4  |
| L16995 | add1                                                                           | 27.1 | 18.8 |
| L17078 | NGF-binding Ig rearranged L-chain mRNA                                         | 8.6  | 6.5  |
| L17138 | hydroxy-delta-5-steroid dehydrogenase, 3 beta- and steroid delta-isomerase 1   | 13.5 | 6.8  |

|        |                                                                                                        |        |       |
|--------|--------------------------------------------------------------------------------------------------------|--------|-------|
| L17318 | proline-rich proteoglycan 2                                                                            | 28     | 20.7  |
| L18948 | S100 calcium-binding protein A9 (calgranulin B)                                                        | 6.1    | 8.3   |
| L19031 | solute carrier family 21, member 1                                                                     | 12.2   | 12.9  |
| L19107 | fibroblast growth factor receptor 2                                                                    | 11.3   | 10.4  |
| L19112 | fibroblast growth factor receptor 2                                                                    | 14.3   | 17.5  |
| L19112 | fibroblast growth factor receptor 2                                                                    | 2.9    | 1.4   |
| L19180 | protein tyrosine phosphatase, receptor type, D                                                         | 33.8   | 18.8  |
| L19180 | protein tyrosine phosphatase, receptor type, D                                                         | 5.1    | 1     |
| L19304 | Adenomatosis polyposis coli                                                                            | 24.8   | 20    |
| L19306 | Adenomatosis polyposis coli                                                                            | 18     | 9.6   |
| L19341 | activin type I receptor                                                                                | 7.8    | 8.8   |
| L19660 | gastric inhibitory peptide receptor                                                                    | 27.4   | 23.8  |
| L19699 | v-ral simian leukemia viral oncogene homolog B                                                         | 68.9   | 21.2  |
| L19708 | N-methyl-D-aspartate receptor (NMDAR1)                                                                 | 8.3    | 8.4   |
| L19931 | solute carrier family 20, member 2                                                                     | 39.9   | 25    |
| L19933 | protein tyrosine phosphatase, receptor type, D                                                         | 19.7   | 12.9  |
| L19998 | sulfotransferase family 1A, phenol-preferring, member 1                                                | 6.1    | 5.6   |
| L20427 | coenzyme q (ubiquinone) biosynthetic enzyme 3                                                          | 2.7    | 1.5   |
| L20468 | glypican 2                                                                                             | 7.7    | 4.5   |
| L20678 | bone morphogenetic protein 2                                                                           | 5.6    | 5     |
| L20681 | v-ets erythroblastosis virus E26 oncogene homolog 1 (avian)                                            | 11     | 11.5  |
| L20682 | v-ets erythroblastosis virus E26 oncogene homolog 1 (avian)                                            | 4.8    | 1.6   |
| L20682 | proto-oncogene (Ets-1)                                                                                 | 2.3    | 1.7   |
| L20820 | syntaxin 3                                                                                             | 13.1   | 10.5  |
| L20821 | syntaxin 4                                                                                             | 9.2    | 6.5   |
| L20822 | syntaxin 5a                                                                                            | 32.8   | 9.1   |
| L20823 | Epimorphin                                                                                             | 7.7    | 8.5   |
| L20838 | Spleen tyrosine kinase                                                                                 | 15.9   | 15.7  |
| L20869 | Pancreatitis-associated protein 3                                                                      | 13.1   | 12.2  |
| L20900 | islet cell autoantigen 1, 69 kDa                                                                       | 10.6   | 10.9  |
| L20913 | vascular endothelial growth factor                                                                     | 3.8    | 3.3   |
| L21192 | growth associated protein 43                                                                           | 41.8   | 15.9  |
| L21672 | solute carrier family 6 (neurotransmitter transporter, glycine), member 5                              | 17     | 4.3   |
| L21711 | Lectin, galactose binding, soluble 5 (Galectin-5)                                                      | 18     | 12    |
| L21995 | Myelin oligodendrocyte glycoprotein                                                                    | 38.2   | 24.8  |
| L22190 | amyloid A protein                                                                                      | 23.6   | 5.6   |
| L22294 | pyruvate dehydrogenase kinase 1                                                                        | 2.6    | 1.7   |
| L22339 | sulfotransferase family 1A, phenol-preferring, member 2                                                | 12.8   | 11.9  |
| L22339 | sulfotransferase family 1A, phenol-preferring, member 2                                                | 2.7    | 1.5   |
| L22557 | vesicle-associated calmodulin-binding protein                                                          | 8.7    | 4.3   |
| L22558 | 5-hydroxytryptamine (serotonin) receptor 7                                                             | 11.4   | 5.5   |
| L22654 | Rat anti-acetylcholine receptor antibody gene, rearranged Ig gamma-2a chain, VDJC region, complete cds | 3      | 1.4   |
| L22760 | GATA-binding protein 6                                                                                 | 42.3   | 25.5  |
| L22761 | GATA-binding protein 4                                                                                 | 5.8    | 2.2   |
| L22788 | fatty acid binding protein 6                                                                           | 1144.2 | 347.8 |
| L23077 | RATZFP15A Rattus rattus zinc finger protein, complete cds                                              | 9.4    | 10.9  |
| L23088 | selectin, platelet                                                                                     | 36.4   | 24    |
| L23128 | Rattus norvegicus MHC class I mRNA, complete cds                                                       | 18.5   | 9     |
| L23128 | Rattus norvegicus MHC class I mRNA, complete cds                                                       | 9.8    | 2.5   |
| L23148 | Inhibitor of DNA binding 1, helix-loop-helix protein (splice variation)                                | 30.6   | 22    |
| L23204 | POU domain, class 6, transcription factor 1                                                            | 9.5    | 4.2   |
| L23219 | guanine nucleotide binding protein, gamma 7                                                            | 35     | 17.7  |
| L23413 | sulfate anion transporter                                                                              | 40.5   | 19.5  |
| L23862 | POU domain, class 2, transcription factor 3                                                            | 12.5   | 3.6   |
| L23863 | POU domain, class 2, transcription factor 3                                                            | 28.9   | 16.1  |
| L23864 | Sperm-1                                                                                                | 8.3    | 5.4   |
| L24051 | early B-cell factor (olfactory neuronal transcription factor 1)                                        | 7.5    | 8     |
| L24207 | cytochrome P450, subfamily 3A, polypeptide 3                                                           | 254.6  | 167.1 |
| L24374 | Matrix metalloproteinase 7 (matrilysin)                                                                | 31.2   | 24.5  |
| L24388 | cell division cycle 2 homolog (S.pombe)-like 1                                                         | 8.6    | 3.6   |
| L24389 | Rattus norvegicus galactosyltransferase associated kinase (GTA) mRNA, 3'UTR                            | 6.7    | 3.8   |
| L24777 | tropomyosin 3, gamma                                                                                   | 8.8    | 10.8  |
| L24897 | catenin (cadherin-associated protein), beta 1 (88kD)                                                   | 14.8   | 19.7  |
| L24907 | calcium/calmodulin-dependent protein kinase I                                                          | 26.2   | 16.2  |
| L25331 | procollagen-lysine, 2-oxoglutarate 5-dioxygenase (lysine hydroxylase, Ehlers-Danlos syndrome type VI)  | 22.6   | 11.6  |
| L25387 | phosphofructokinase C (PFK-C)                                                                          | 7.5    | 4.9   |
| L25527 | Selectin, endothelial cell                                                                             | 4.3    | 4.9   |
| L25605 | Dynamin 2                                                                                              | 15.7   | 12    |
| L25633 | regulated endocrine-specific protein 18                                                                | 15.8   | 19    |
| L25633 | regulated endocrine-specific protein 18                                                                | 9      | 7.5   |
| L25785 | Transforming growth factor beta stimulated clone 22                                                    | 45.6   | 12.8  |
| L25866 | octamer-binding transcription factor                                                                   | 10     | 13.6  |
| L25925 | prostaglandin-endoperoxide synthase 2                                                                  | 43.4   | 41.5  |
| L25926 | Sucrase-isomaltase                                                                                     | 1.6    | 0.5   |
| L26009 | Alpha1,2-fucosyltransferase a                                                                          | 21.7   | 10.4  |
| L26043 | Perilipin                                                                                              | 13.7   | 9.2   |
| L26292 | Kruppel-like factor 4 (gut)                                                                            | 8.4    | 9.4   |

|        |                                                                                       |      |      |
|--------|---------------------------------------------------------------------------------------|------|------|
| L26293 | FSH-regulated protein                                                                 | 17.8 | 16.1 |
| L26525 | Discoidin domain receptor family, member 1                                            | 3.3  | 2    |
| L26913 | interleukin 13                                                                        | 18.8 | 9.5  |
| L26986 | adenylyl cyclase 8                                                                    | 8.2  | 9.1  |
| L27059 | Phosphodiesterase 4D, cAMP-specific (dunce (Drosophila)-homolog phosphodiesterase E3) | 4.3  | 4.3  |
| L27060 | Phosphodiesterase 4D, cAMP-specific (dunce (Drosophila)-homolog phosphodiesterase E3) | 10.5 | 6.1  |
| L27061 | cAMP-specific 3,5-cyclic phosphodiesterase 4C                                         | 22.4 | 20.8 |
| L27061 | cAMP-specific 3,5-cyclic phosphodiesterase 4C                                         | 2.4  | 1.2  |
| L27075 | ATP-citrate lyase                                                                     | 20.7 | 20.3 |
| L27075 | ATP citrate lyase                                                                     | 3    | 1.9  |
| L27081 | Melanocortin 5 receptor                                                               | 33.9 | 13   |
| L27112 | stress activated protein kinase alpha II                                              | 2.6  | 1.3  |
| L27124 | N-arginine dibasic convertase 1                                                       | 31.9 | 11.2 |
| L27128 | mitogen activated protein kinase 10                                                   | 4.4  | 2.5  |
| L27129 | mitogen-activated protein kinase 8                                                    | 50.1 | 26.7 |
| L27340 | sonic hedgehog homolog (Drosophila)                                                   | 23.1 | 8    |
| L27421 | frequenin homolog (Drosophila)                                                        | 9.7  | 15.9 |
| L27513 | TR4 orphan receptor                                                                   | 5.3  | 3.8  |
| L27651 | solute carrier family 22 (organic anion transporter), member 7                        | 8.5  | 3.8  |
| L27651 | solute carrier family 22 (organic anion transporter), member 7                        | 8.2  | 6.3  |
| L27663 | POU domain, class 3, transcription factor 2                                           | 28.6 | 19.3 |
| L27867 | Neurexophilin 1                                                                       | 7.9  | 6    |
| L28113 | aquaporin 6                                                                           | 16.6 | 13.2 |
| L28114 | RATRNASEQB Rat mRNA sequence                                                          | 16.4 | 10.4 |
| L28126 | RATGTT2A Rattus norvegicus glucose transporter type 2 (GLUT2)                         | 10.2 | 8    |
| L28135 | solute carrier family 2, member 2                                                     | 7.5  | 6.6  |
| L28801 | general transcription factor III C 1                                                  | 27.8 | 7    |
| L28818 | involucrin gene                                                                       | 10.5 | 7.8  |
| L29090 | G protein beta-subunit gene                                                           | 10.9 | 10.1 |
| L29232 | insulin-like growth factor 1 receptor                                                 | 33.3 | 13.1 |
| L31394 | parathyroid hormone receptor                                                          | 12.4 | 11.7 |
| L31546 | serotonin 5HT-2 receptor gene                                                         | 13.9 | 7.2  |
| L31619 | cholinergic receptor, nicotinic, alpha polypeptide 7                                  | 38.3 | 27.1 |
| L31619 | cholinergic receptor, nicotinic, alpha polypeptide 7                                  | 12.7 | 10.8 |
| L31621 | cholinergic receptor, nicotinic, alpha polypeptide 3                                  | 24.8 | 28   |
| L31622 | cholinergic receptor, nicotinic, beta polypeptide 2                                   | 10.9 | 5.4  |
| L31840 | nuclear pore complex protein                                                          | 27.6 | 13.6 |
| L31882 | DNA binding protein (N5)                                                              | 19.6 | 13.1 |
| L32132 | lipopolysaccharide binding protein                                                    | 12.9 | 7.6  |
| L32591 | growth arrest and DNA-damage-inducible 45 alpha                                       | 14.5 | 9.9  |
| L32601 | 20 alpha-hydroxysteroid dehydrogenase                                                 | 30.1 | 8.8  |
| L32602 | Orthodenticle (Drosophila) homolog 1                                                  | 8.8  | 3.1  |
| L33413 | advanced glycosylation end product-specific receptor                                  | 14   | 2.6  |
| L33894 | deoxycytidine kinase                                                                  | 2.2  | 0.9  |
| L34049 | low density lipoprotein receptor-related protein 2                                    | 18.1 | 10.8 |
| L34049 | low density lipoprotein receptor-related protein 2                                    | 2.2  | 1    |
| L34074 | Olfactory receptor                                                                    | 31.2 | 10.6 |
| L34542 | megakaryocyte-associated tyrosine kinase                                              | 3.4  | 1.4  |
| L34821 | aldehyde dehydrogenase family 5, subfamily A1                                         | 17.2 | 13   |
| L35571 | insulin related protein 2                                                             | 39.3 | 30.3 |
| L35767 | Very low density lipoprotein receptor                                                 | 8.7  | 10   |
| L35771 | potassium inwardly-rectifying channel, subfamily J, member 5                          | 19.6 | 19.3 |
| L35921 | G-protein gamma 8 subunit                                                             | 8.9  | 7.2  |
| L35921 | G-protein gamma 8 subunit                                                             | 7    | 4.5  |
| L36029 | guanylyl cyclase (GC-E)                                                               | 6.4  | 4.5  |
| L36030 | guanylate cyclase 2F, retinal                                                         | 5.7  | 8    |
| L36088 | activin A receptor type II-like 1                                                     | 27.1 | 8.8  |
| L36388 | forkhead box J1                                                                       | 5.6  | 4.2  |
| L36459 | Interleukin 9 receptor                                                                | 11   | 10.7 |
| L36460 | interleukin 9                                                                         | 11.4 | 7.5  |
| L36884 | Osteotesticular phosphatase                                                           | 8.1  | 7.1  |
| L37203 | guanylate cyclase 2d                                                                  | 66   | 33   |
| L37333 | glucose-6-phosphatase, catalytic                                                      | 9.9  | 2.7  |
| L37965 | T-cell receptor alpha-chain                                                           | 12.3 | 5.4  |
| L37970 | T-cell receptor alpha-chain                                                           | 18.3 | 16.9 |
| L38424 | ---                                                                                   | 12.4 | 17.7 |
| L38424 | ---                                                                                   | 11.6 | 11.9 |
| L38424 | ---                                                                                   | 2.4  | 0.5  |
| L38482 | serine protease                                                                       | 25.1 | 15.6 |
| L38482 | serine protease                                                                       | 21.8 | 1.8  |
| L38483 | jagged 1                                                                              | 9.7  | 4.6  |
| L38615 | glutathione synthetase                                                                | 83   | 46.8 |
| L38615 | glutathione synthetase                                                                | 5.9  | 6.7  |
| L38644 | karyopherin,beta 1                                                                    | 20   | 19.3 |
| L39018 | sodium channel, voltage-gated, type 8, alpha polypeptide                              | 52.1 | 48   |
| L39991 | nucleoporin 98                                                                        | 9    | 7.6  |
| L40030 | placental growth factor                                                               | 6.6  | 11   |
| L40624 | ATP-binding cassette, subfamily C (CFTR/MRP), member 8                                | 2.1  | 1.1  |
| L41045 | phosphodiesterase 1C                                                                  | 6.3  | 3.4  |

|        |                                                                            |      |      |
|--------|----------------------------------------------------------------------------|------|------|
| L41254 | FXYP domain-containing ion transport regulator 4                           | 22.1 | 14.9 |
| L41275 | cyclin-dependent kinase inhibitor 1A                                       | 20.7 | 19.6 |
| L41623 | pdgf protein                                                               | 9.9  | 10.2 |
| L41684 | RATORFB Rattus norvegicus (clone REM2) ORF mRNA, partial cds               | 8.3  | 3.1  |
| L41685 | RATORFC Rattus norvegicus (clone REM3) ORF mRNA, partial cds               | 96.1 | 45.1 |
| L41686 | RATORFD Rattus norvegicus (clone REM4) ORF mRNA, partial cds               | 11.8 | 8.9  |
| L42293 | acyl-coenzyme A:cholesterol acyltransferase                                | 18.8 | 9.5  |
| L43592 | Protocadherin-3, cadherin-related protein                                  | 2.1  | 0.3  |
| L46791 | carboxylesterase 3                                                         | 3.5  | 3.3  |
| L46873 | solute carrier family 15 (oligopeptide transporter), member 1              | 16.1 | 11.4 |
| L46874 | cadherin 17                                                                | 9.1  | 6    |
| L47281 | collagen, type IV, alpha 3                                                 | 3.6  | 4.6  |
| L48060 | prolactin receptor                                                         | 15.6 | 15   |
| L48618 | collagen type II (Col2A1)                                                  | 2.1  | 0.9  |
| L77929 | potassium inwardly-rectifying channel, subfamily J, member 9               | 24.4 | 16.3 |
| L78306 | hydroxyindole-O-methyltransferase                                          | 3    | 0.7  |
| L79910 | sarcosine dehydrogenase                                                    | 3.7  | 1.6  |
| L81136 | Rps2r1 preliminary DNA,                                                    | 4.9  | 3.1  |
| L81137 | Rps2r2 gene                                                                | 15   | 13.1 |
| L81138 | Rps2r gene                                                                 | 1.3  | 0.4  |
| M00001 | apolipoprotein A-I                                                         | 4.6  | 2.6  |
| M00002 | apolipoprotein A-IV                                                        | 25.9 | 10.3 |
| M10088 | prodynorphin                                                               | 14.1 | 9.1  |
| M10094 | RT1 class Ib gene                                                          | 6.6  | 2.5  |
| M10140 | creatine kinase, muscle                                                    | 40.5 | 16.4 |
| M10244 | Tyrosine hydroxylase                                                       | 45.1 | 34.2 |
| M10934 | retinol-binding protein (RBP)                                              | 8.4  | 5.5  |
| M11251 | cytochrome P450, 2b19                                                      | 20   | 15.6 |
| M11266 | Ornithine carbamoyltransferase                                             | 17.1 | 5.3  |
| M11565 | Tonin                                                                      | 3    | 2    |
| M11566 | submaxillary gland S3 kallikrein                                           | 11.6 | 9.1  |
| M11596 | calcitonin-related polypeptide, beta                                       | 4.9  | 6.7  |
| M11597 | calcitonin/calcitonin-related polypeptide, alpha                           | 7.6  | 8    |
| M11710 | Carboamyl-phosphate synthetase 1                                           | 19.6 | 20.3 |
| M11794 | Metallothionein                                                            | 27.2 | 19.6 |
| M11851 | Rat heart myosin light chain 2 (MLC2) mRNA, 3' end                         | 69.1 | 60.9 |
| M11901 | proline-rich protein 15                                                    | 8.9  | 6.8  |
| M12098 | myosin, heavy polypeptide 3                                                | 3    | 2.9  |
| M12112 | angiotensinogen                                                            | 5.2  | 7.9  |
| M12335 | nucleus-encoded mitochondrial carbamyl phosphate synthetase I gene         | 8.7  | 13   |
| M12337 | Phenylalanine hydroxylase                                                  | 5.1  | 4    |
| M12450 | Group-specific component (vitamin D-binding protein)                       | 10   | 8    |
| M12492 | protein kinase, cAMP dependent regulatory, type II beta                    | 15.2 | 10.1 |
| M12492 | protein kinase, cAMP dependent regulatory, type II beta                    | 5.1  | 2.3  |
| M12579 | gonadotropin-releasing hormone 1                                           | 9.2  | 8.2  |
| M12822 | Ig germline kappa-chain gene C-region, 3' end                              | 1.9  | 1    |
| M12981 | Ig germline kappa-chain gene C-region, 3' end                              | 23.1 | 16.2 |
| M13011 | c-ras-H-1 gene                                                             | 48.8 | 45.6 |
| M13101 | long interspersed repetitive DNA sequence LINE4 (L1Rn)                     | 22.7 | 19.8 |
| M13170 | histone 1, H1t                                                             | 9.6  | 7.5  |
| M13234 | cytochrome P450, 2b19                                                      | 21.7 | 19   |
| M13506 | liver UDP-glucuronosyltransferase, phenobarbital-inducible form            | 12.5 | 9.4  |
| M13588 | pancreatic polypeptide                                                     | 16.9 | 14.4 |
| M13646 | testosterone 6-beta-hydroxylase                                            | 4.3  | 4.8  |
| M13707 | protein kinase C, gamma                                                    | 7.1  | 3.8  |
| M13749 | chorionic somatomammotropin hormone 2                                      | 10.9 | 5.4  |
| M13750 | Prolactin-like protein A                                                   | 2.2  | 0.5  |
| M13949 | retinol-binding protein 2                                                  | 10.3 | 7.1  |
| M13979 | solute carrier family 2,member 1                                           | 17.9 | 12.9 |
| M14053 | nuclear receptor subfamily 3, group C, member 1                            | 11   | 9.6  |
| M14369 | K-kininogen, differential splicing leads to HMW Kngk                       | 10.6 | 7    |
| M14434 | Rat Ig active kappa-chain mRNA VJC-region from immunocytoma IR2            | 5.1  | 5.6  |
| M14775 | cytochrome P450, 2c39                                                      | 3.5  | 6.4  |
| M14776 | cytochrome P-450 PB-1                                                      | 15.7 | 10.6 |
| M14952 | Apolipoprotein B                                                           | 4.4  | 1.3  |
| M14972 | cytochrome P450, 4a10                                                      | 25.5 | 16   |
| M15114 | Rat DNA polymerase alpha mRNA, 3' end                                      | 12.5 | 9    |
| M15114 | Rat DNA polymerase alpha mRNA, 3' end                                      | 5.6  | 5.8  |
| M15191 | Tachykinin (substance P, neurokinin A, neuropeptide K, neuropeptide gamma) | 26.4 | 8    |
| M15327 | alcohol dehydrogenase 1                                                    | 21.6 | 8.5  |
| M15358 | MHC class II RT1.B beta                                                    | 2.2  | 1.5  |
| M15402 | Ig active kappa-chain                                                      | 14   | 10.5 |
| M15427 | v-raf-1 murine leukemia viral oncogene homolog 1                           | 22.6 | 16.9 |
| M15474 | tropomyosin 1, alpha                                                       | 13   | 7.4  |
| M15481 | insulin-like growth factor 1                                               | 58.2 | 41.1 |
| M15523 | protein kinase C, epsilon                                                  | 36.9 | 25.3 |
| M15527 | gonadotropin-releasing hormone 1                                           | 4.6  | 6.7  |
| M15528 | gonadotropin-releasing hormone 1                                           | 22.5 | 2.3  |
| M15528 | gonadotropin-releasing hormone 1                                           | 2.2  | 0.6  |

|        |                                                                                                                                |      |      |
|--------|--------------------------------------------------------------------------------------------------------------------------------|------|------|
| M15562 | Rat MHC class II RT1.u-D-alpha chain mRNA, 3' end                                                                              | 32.8 | 11.2 |
| M15562 | Rat MHC class II RT1.u-D-alpha chain mRNA, 3' end                                                                              | 20.7 | 17.8 |
| M15644 | Olfactory marker protein                                                                                                       | 14.3 | 19.8 |
| M15682 | cholinergic receptor, nicotinic, alpha polypeptide 4                                                                           | 69.9 | 29.2 |
| M15797 | nidogen (entactin)                                                                                                             | 2.6  | 0.8  |
| M15880 | Neuropeptide Y                                                                                                                 | 22   | 11.2 |
| M15882 | clathrin, light polypeptide (Lca)                                                                                              | 26.7 | 28.4 |
| M15883 | clathrin, light polypeptide (Lcb)                                                                                              | 85.4 | 46.6 |
| M15883 | clathrin, light polypeptide (Lcb)                                                                                              | 11.7 | 10.4 |
| M15901 | crystallin, beta B3                                                                                                            | 40.9 | 31.3 |
| M15944 | membrane metallo endopeptidase                                                                                                 | 10.6 | 4.2  |
| M16112 | calcium/calmodulin-dependent protein kinase II beta subunit                                                                    | 1.7  | 0.9  |
| M16235 | Lipase, hepatic                                                                                                                | 21.5 | 11.1 |
| M16406 | cholinergic receptor, muscarinic 1                                                                                             | 3.9  | 1.4  |
| M16407 | cholinergic receptor, muscarinic 3                                                                                             | 26.4 | 12.4 |
| M16409 | cholinergic receptor, muscarin 4                                                                                               | 1.5  | 0.8  |
| M16410 | tachykinin 2                                                                                                                   | 5.2  | 2.1  |
| M16624 | cationic trypsinogen                                                                                                           | 2.9  | 1.5  |
| M16762 | interleukin 2 (IL-2)                                                                                                           | 4.3  | 2.1  |
| M16960 | calcium/calmodulin-dependent protein kinase II alpha subunit                                                                   | 5.3  | 6.6  |
| M17096 | Transition protein 1                                                                                                           | 23.8 | 31.4 |
| M17412 | growth and transformation-dependent protein                                                                                    | 22.5 | 18.2 |
| M17523 | tyrosine-tyrosine (YY)                                                                                                         | 24.7 | 24.5 |
| M17523 | tyrosine-tyrosine (YY)                                                                                                         | 14.6 | 10.5 |
| M17526 | guanine nucleotide binding protein, alpha o                                                                                    | 20.6 | 10.1 |
| M17526 | guanine nucleotide binding protein, alpha o                                                                                    | 18.7 | 15.2 |
| M17527 | Guanine nucleotide binding protein, alpha inhibiting 1                                                                         | 4    | 2    |
| M17703 | glutamine/glutamic acid-rich protein GRP-Ca                                                                                    | 15.4 | 6.2  |
| M17960 | Insulin-like growth factor II (somatomedin A)                                                                                  | 59.7 | 24.7 |
| M17960 | Insulin-like growth factor II (somatomedin A)                                                                                  | 27   | 19.6 |
| M18045 | testis-specific histone 2b                                                                                                     | 3.3  | 2.8  |
| M18330 | protein kinase C, delta                                                                                                        | 35.1 | 14   |
| M18331 | protein kinase C, epsilon                                                                                                      | 8.3  | 8.5  |
| M18331 | protein kinase C, epsilon                                                                                                      | 6    | 3.4  |
| M18332 | protein kinase C, zeta                                                                                                         | 13   | 13   |
| M18335 | cytochrome P450, 2c39                                                                                                          | 6.7  | 4.4  |
| M18349 | Protein tyrosine phosphatase, receptor-type, c polypeptide (antigen Cd45, leukocyte-common antigen/T200 glycoprotein) also RT7 | 8.6  | 7.9  |
| M18363 | Cytochrome P450, subfamily IIC (mephenytoin 4-hydroxylase)                                                                     | 12.7 | 13.1 |
| M18416 | early growth response 1                                                                                                        | 8.6  | 6.8  |
| M18526 | Ig germline kappa-chain C-region gene, 3' end                                                                                  | 7.9  | 6.7  |
| M18527 | Ig germline kappa-chain C-region gene, 3' end                                                                                  | 5    | 1.1  |
| M18528 | Ig germline kappa-chain C-region gene, 3' end                                                                                  | 2.1  | 0.9  |
| M18529 | Ig germline kappa-chain C-region gene, 3' end                                                                                  | 1.8  | 0.5  |
| M18530 | Ig germline kappa-chain C-region gene, 3' end                                                                                  | 21.7 | 7.2  |
| M18531 | Ig germline kappa-chain C-region gene, 3' end                                                                                  | 9    | 5.7  |
| M18532 | Ig germline kappa-chain C-region gene, 3' end                                                                                  | 16.6 | 16   |
| M18842 | T-cell receptor active beta-chain V-region                                                                                     | 5.2  | 9    |
| M18853 | Rat T-cell receptor active alpha-chain C-region mRNA, partial cds, clone TRA29                                                 | 18.2 | 13.3 |
| M18854 | Rat T-cell receptor active beta-chain C-region mRNA, partial cds, clone TRB4                                                   | 27.3 | 32.5 |
| M19257 | Retinol-binding protein 1                                                                                                      | 11.9 | 10.2 |
| M19304 | prolactin receptor                                                                                                             | 5.7  | 1.1  |
| M19357 | gamma-F-crystallin (gamma 4-1)                                                                                                 | 28.1 | 14.9 |
| M19359 | crystallin, alpha A                                                                                                            | 5.3  | 2.9  |
| M19359 | Transcribed sequence with strong similarity to protein sp:P10065 (R.norvegicus) CRGA_RAT GAMMA CRYSTALLIN A (1-1)              | 2.6  | 1.8  |
| M19647 | Rattus norvegicus (clone K-32) kallikrein mRNA, 3' end                                                                         | 30.8 | 33   |
| M19647 | Rattus norvegicus (clone K-32) kallikrein mRNA, 3' end                                                                         | 18.2 | 4.6  |
| M19648 | renal kallikrein                                                                                                               | 15.3 | 12.6 |
| M19651 | Fos-like antigen 1                                                                                                             | 16.3 | 18.6 |
| M20131 | cytochrome P450, subfamily 2E, polypeptide 1                                                                                   | 18.1 | 17.5 |
| M20183 | cytochrome c oxidase subunit VIc-1                                                                                             | 24.2 | 18   |
| M20297 | cholinergic receptor, nicotinic, alpha polypeptide 2 (neuronal)                                                                | 16.1 | 10.2 |
| M20406 | cytochrome P450IIB3                                                                                                            | 4.5  | 2    |
| M20623 | cytochrome c, testis                                                                                                           | 6.4  | 5.3  |
| M20629 | Esterase 2                                                                                                                     | 28.1 | 20.2 |
| M20636 | Phospholipase C-beta1                                                                                                          | 8    | 7.9  |
| M20637 | phospholipase C, delta 1                                                                                                       | 3.3  | 2.9  |
| M20721 | Rat proline-rich protein mRNA, 3' end                                                                                          | 19.7 | 17   |
| M20722 | Rat proline-rich protein mRNA, 3' end                                                                                          | 5.4  | 8.7  |
| M20724 | Rat proline-rich protein mRNA, 3' end                                                                                          | 14.9 | 5.1  |
| M21208 | cytochrome P450, subfamily 17                                                                                                  | 4.1  | 1.2  |
| M21210 | glutathione peroxidase                                                                                                         | 2.9  | 0.2  |
| M21410 | 5-hydroxytryptamine (serotonin) receptor 2C                                                                                    | 8.9  | 7.9  |
| M21622 | Fc fragment of IgE, high affinity I, receptor for, alpha polypeptide                                                           | 19.6 | 13.7 |
| M21622 | Fc fragment of IgE, high affinity I, receptor for, alpha polypeptide                                                           | 10.8 | 15.2 |
| M21759 | filaggrin                                                                                                                      | 21.1 | 10.1 |
| M21770 | asialoglycoprotein receptor 1                                                                                                  | 16.1 | 2.8  |
| M21817 | MHC V-beta-11                                                                                                                  | 4.6  | 7.1  |

|         |                                                                                                                                |       |      |
|---------|--------------------------------------------------------------------------------------------------------------------------------|-------|------|
| M21842  | Apolipoprotein B                                                                                                               | 4.5   | 7.8  |
| M22253  | sodium channel, voltage-gated, type 1, alpha polypeptide                                                                       | 1.2   | 0.6  |
| M22254  | sodium channel, voltage-gated, type 2, alpha 1 polypeptide                                                                     | 10    | 6.8  |
| M22323  | actin, gamma 2                                                                                                                 | 13.6  | 10.3 |
| M22340  | cartilage link protein 1                                                                                                       | 4.3   | 2.2  |
| M22357  | Myelin-associated glycoprotein                                                                                                 | 8.6   | 13.9 |
| M22359  | alpha(1)-inhibitor 3, variant I                                                                                                | 1.6   | 1    |
| M22360  | alpha(1)-inhibitor 3, variant I                                                                                                | 13.7  | 11.8 |
| M22366  | MHC class II RT1.B-alpha chain                                                                                                 | 44.2  | 39.2 |
| M22400  | Glypican 3                                                                                                                     | 9.9   | 4.6  |
| M22412  | Potassium voltage-gated channel, Isk-related subfamily, member 1                                                               | 3.5   | 3.4  |
| M22427  | Fibroblast growth factor 2                                                                                                     | 36.4  | 18.5 |
| M22631  | Propionyl Coenzyme A carboxylase, alpha polypeptide                                                                            | 18.9  | 5    |
| M22670  | alpha-2-macroglobulin                                                                                                          | 18.3  | 10.8 |
| M22670  | alpha-2-macroglobulin gene                                                                                                     | 2.9   | 1.2  |
| M22899  | interleukin 2                                                                                                                  | 3.5   | 1.6  |
| M22922  | renal kallikrein                                                                                                               | 15.1  | 14.2 |
| M22923  | membrane-spanning 4-domains, subfamily A, member 2                                                                             | 12.1  | 9.3  |
| M22924  | membrane-spanning 4-domains, subfamily A, member 2                                                                             | 13.4  | 10.2 |
| M22924  | membrane-spanning 4-domains, subfamily A, member 2                                                                             | 8.8   | 2.8  |
| M22926  | muscarinic acetylcholine receptor M5                                                                                           | 40.6  | 33.2 |
| M23264  | androgen receptor                                                                                                              | 11.2  | 14.9 |
| M23316  | ---                                                                                                                            | 9.8   | 6    |
| M23566  | alpha-2-macroglobulin                                                                                                          | 50.7  | 37.4 |
| M23572  | Transcribed sequence with strong similarity to protein sp:P05432 (R.norvegicus) G33_RAT GENE 33 POLYPEPTIDE                    | 5.8   | 5.8  |
| M23601  | Monoamine oxidase B                                                                                                            | 12.8  | 10.5 |
| M23643  | Tryptotropin releasing hormone                                                                                                 | 40.4  | 22.4 |
| M23697  | Plasminogen activator, tissue                                                                                                  | 11    | 7    |
| M23721  | Transcribed sequence with strong similarity to protein sp:P19222 (R.norvegicus) CBP2_RAT Carboxypeptidase A2 precursor         | 5     | 2.5  |
| M23881  | T-cell receptor beta-chain                                                                                                     | 6.7   | 2.9  |
| M23882  | T-cell receptor beta-chain                                                                                                     | 5     | 1.5  |
| M23883  | T-cell receptor beta-chain                                                                                                     | 2.6   | 2.7  |
| M23885  | T-cell receptor beta-chain                                                                                                     | 5.5   | 5.8  |
| M23887  | T-cell receptor beta-chain                                                                                                     | 3.8   | 1.3  |
| M23888  | T-cell receptor beta-chain                                                                                                     | 7.2   | 2.7  |
| M23889  | T-cell receptor beta-chain                                                                                                     | 13.5  | 5.7  |
| M23889  | T-cell receptor beta-chain                                                                                                     | 7.2   | 6.5  |
| M23890  | T-cell receptor unproductive beta-chain                                                                                        | 17.1  | 8.5  |
| M23995  | aldehyde dehydrogenase family 1, subfamily A4                                                                                  | 181.2 | 71.3 |
| M23995  | aldehyde dehydrogenase family 1, subfamily A4                                                                                  | 10.4  | 15.7 |
| M24067  | serine (or cysteine) proteinase inhibitor, member 1                                                                            | 31.9  | 6.4  |
| M24104  | Vesicle-associated membrane protein 1                                                                                          | 26.2  | 20.2 |
| M24104  | Vesicle-associated membrane protein 1                                                                                          | 9.5   | 4.9  |
| M24105  | vesicle-associated membrane protein 2                                                                                          | 63.2  | 29.5 |
| M24108  | alpha2u globulin                                                                                                               | 6.5   | 3    |
| M24109  | alpha2u globulin                                                                                                               | 13.4  | 9.7  |
| M24239  | cytochrome P450-1/PB-(ps)                                                                                                      | 26.1  | 8.6  |
| M24353  | Mannosidase 2, alpha 1                                                                                                         | 37.5  | 31.3 |
| M24353  | Mannosidase 2, alpha 1                                                                                                         | 20.7  | 15.3 |
| M24393  | myogenin                                                                                                                       | 4.7   | 0.7  |
| M24537B | ---                                                                                                                            | 5.7   | 7.1  |
| M24537B | ---                                                                                                                            | 8.9   | 6.5  |
| M24537B | ---                                                                                                                            | 2.5   | 1.7  |
| M24604  | Proliferating cell nuclear antigen                                                                                             | 50.8  | 25.7 |
| M24852  | Neuron specific protein PEP-19 (Purkinje cell protein 4)                                                                       | 12.9  | 6.6  |
| M25073  | alanyl (membrane) aminopeptidase                                                                                               | 9.3   | 6.8  |
| M25157  | superoxide dismutase 1                                                                                                         | 537.9 | 329  |
| M25348  | Phosphodiesterase 4A                                                                                                           | 4.4   | 1.6  |
| M25350  | Phosphodiesterase 4B, cAMP-specific (dunce (Drosophila)-homolog phosphodiesterase E4)                                          | 8.8   | 7.1  |
| M25490  | bone gamma-carboxylglutamate protein                                                                                           | 18.1  | 12.3 |
| M25638  | neurofilament, light polypeptide                                                                                               | 12.2  | 11.9 |
| M25804  | nuclear receptor subfamily 1, group D, member 1                                                                                | 38.4  | 26   |
| M25804  | nuclear receptor subfamily 1, group D, member 1                                                                                | 9.5   | 7.4  |
| M25823  | Protein tyrosine phosphatase, receptor-type, c polypeptide (antigen Cd45, leukocyte-common antigen/T200 glycoprotein) also RT7 | 16.5  | 14.7 |
| M25888  | proteolipid protein                                                                                                            | 20.6  | 13.1 |
| M25890  | somatostatin                                                                                                                   | 6.9   | 3.8  |
| M25892  | interleukin 4                                                                                                                  | 9     | 7.8  |
| M26125  | epoxide hydrolase 1                                                                                                            | 9.3   | 8.7  |
| M26127  | cytochrome P450, 1a2                                                                                                           | 50.9  | 21.9 |
| M26161  | potassium voltage-gated channel, shaker-related subfamily, member 1                                                            | 4.6   | 3.2  |
| M26199  | Luteinizing hormone/choriogonadotropin receptor                                                                                | 6.6   | 4.6  |
| M26247  | coagulation factor 9                                                                                                           | 18.8  | 12.3 |
| M26534  | Rat submaxillary gland S1 kallikrein mRNA, partial cds                                                                         | 6.9   | 3.9  |
| M26534  | Rat submaxillary gland S1 kallikrein mRNA, partial cds                                                                         | 2.1   | 3.2  |
| M26594  | malic enzyme 1                                                                                                                 | 15.6  | 11.9 |
| M26643  | sodium channel, voltage-gated, type 4, alpha polypeptide                                                                       | 18.6  | 6.2  |

|        |                                                                                                                    |      |      |
|--------|--------------------------------------------------------------------------------------------------------------------|------|------|
| M26643 | sodium channel, voltage-gated, type 4, alpha polypeptide                                                           | 11.9 | 8.5  |
| M26686 | Protein-L-isoaspartate (D-aspartate) O-methyltransferase                                                           | 13.2 | 10.9 |
| M26686 | Protein-L-isoaspartate (D-aspartate) O-methyltransferase                                                           | 10.8 | 7.1  |
| M26715 | Phosphodiesterase 4A                                                                                               | 28.3 | 18.1 |
| M26744 | Interleukin 6 (interferon, beta 2)                                                                                 | 4.1  | 3.6  |
| M26745 | interleukin 6 (IL6)                                                                                                | 3.4  | 1.8  |
| M26896 | natriuretic peptide receptor 2                                                                                     | 27.3 | 16   |
| M27048 | follicle stimulating hormone beta subunit                                                                          | 6.3  | 4.5  |
| M27151 | myogenic factor 6                                                                                                  | 27   | 22.8 |
| M27156 | probasin                                                                                                           | 17.6 | 10.6 |
| M27156 | probasin                                                                                                           | 1.8  | 1    |
| M27158 | potassium voltage gated channel, shaker related subfamily, member 5                                                | 17.7 | 8.4  |
| M27159 | potassium channel-Kv2                                                                                              | 6    | 6.1  |
| M27217 | kallikrein (rGK-8)                                                                                                 | 5.9  | 1.1  |
| M27223 | Na+ channel                                                                                                        | 10.4 | 9.4  |
| M27293 | insulin-like growth factor 1 receptor                                                                              | 29   | 14.3 |
| M27433 | germinal histone H4 gene                                                                                           | 22.9 | 13.6 |
| M27434 | alpha-2u globulin PGCL1                                                                                            | 18.4 | 3.6  |
| M27440 | Apolipoprotein B                                                                                                   | 23.9 | 10.9 |
| M27466 | cytochrome oxidase subunit VIc                                                                                     | 31.9 | 17.9 |
| M27467 | cytochrome oxidase subunit VIc                                                                                     | 22.8 | 10.1 |
| M27726 | Brain glycogen phosphorylase                                                                                       | 4.9  | 2    |
| M27812 | synapsin 1                                                                                                         | 47.2 | 29.2 |
| M27886 | bifunctional enzyme 6-phosphofructo-2-kinase/fructose 2,6-bisphosphatase                                           | 45.5 | 38.3 |
| M27902 | Sodium channel, voltage-gated, type V, alpha polypeptide                                                           | 6.1  | 2.7  |
| M27925 | synapsin 2                                                                                                         | 1.9  | 1    |
| M28259 | Fibronectin 1                                                                                                      | 3    | 2.7  |
| M28647 | ATPase, Na+K+ transporting, alpha 1                                                                                | 51.6 | 7.7  |
| M28647 | ATPase, Na+K+ transporting, alpha 1                                                                                | 2.4  | 0.7  |
| M28648 | ATPase, Na+K+ transporting, alpha 3 subunit                                                                        | 10   | 10.9 |
| M28654 | myosin heavy chain                                                                                                 | 34.4 | 16.4 |
| M28670 | rearranged gamma-1                                                                                                 | 19.6 | 14.1 |
| M28671 | Transcribed sequence with strong similarity to protein sp:P20761 (R.norvegicus) GCB_RAT IG GAMMA-2B CHAIN C REGION | 18.8 | 8.2  |
| M29014 | insulin receptor                                                                                                   | 20.1 | 14.2 |
| M29069 | myc-like oncogene, s-myc protein                                                                                   | 5.8  | 2.8  |
| M29249 | 3-hydroxy-3-methylglutaryl-Coenzyme A reductase                                                                    | 3.2  | 3.2  |
| M29293 | small nuclear ribonucleoprotein-associated protein (snRNP) mRNA, clone Sm51                                        | 15   | 12.7 |
| M29295 | small nuclear ribonucleoprotein polypeptides B and B1                                                              | 73   | 14.2 |
| M29317 | Interferon gamma                                                                                                   | 14.8 | 10.9 |
| M29472 | mevalonate kinase                                                                                                  | 10.6 | 12.1 |
| M29853 | cytochrome P450, subfamily 4B, polypeptide 1                                                                       | 10.7 | 5    |
| M30282 | kallikrein B, plasma 1                                                                                             | 2.4  | 1    |
| M30312 | potassium voltage gated channel, shaker related subfamily, member 3                                                | 10   | 9.7  |
| M30689 | Ly6-B antigen gene                                                                                                 | 7.2  | 5.8  |
| M30691 | Ly6-C antigen gene                                                                                                 | 36.7 | 32.7 |
| M31031 | cytochrome P450, 2c39                                                                                              | 8.9  | 8.4  |
| M31032 | glutamine/glutamic acid-rich protein GRP-Ca                                                                        | 45.8 | 22.3 |
| M31038 | RT1 class Ib gene                                                                                                  | 49.5 | 25.3 |
| M31076 | Transforming growth factor, alpha                                                                                  | 7.3  | 4.8  |
| M31109 | UDP-glucuronosyltransferase 2B3 precursor, microsomal                                                              | 9.1  | 5.2  |
| M31155 | Prolactin-like protein B                                                                                           | 20.7 | 4.2  |
| M31173 | epididymal glycoprotein                                                                                            | 14.3 | 7.3  |
| M31174 | thyroid hormone receptor alpha                                                                                     | 15.2 | 7.9  |
| M31174 | thyroid hormone receptor alpha                                                                                     | 10.6 | 4.3  |
| M31176 | gastrin-releasing peptide                                                                                          | 25.9 | 11.4 |
| M31178 | calbindin 1                                                                                                        | 15.1 | 10.5 |
| M31178 | calbindin 1                                                                                                        | 14.3 | 5.9  |
| M31179 | sex hormone binding globulin                                                                                       | 14   | 7.7  |
| M31229 | H1 histone family, member 4                                                                                        | 6.6  | 1.3  |
| M31363 | sulfotransferase, hydroxysteroid preferring 2                                                                      | 5.7  | 1.1  |
| M31433 | voltage-dependent sodium channel type II protein                                                                   | 19.4 | 23.3 |
| M31603 | parathyroid hormone-like peptide                                                                                   | 1.8  | 0.7  |
| M31655 | Thyroid peroxidase                                                                                                 | 15.7 | 6.9  |
| M31725 | Contactin 2                                                                                                        | 20.4 | 14.5 |
| M31788 | phosphoglycerate kinase 1                                                                                          | 3.8  | 2.5  |
| M31809 | protein phosphatase 3, catalytic subunit, beta isoform                                                             | 4    | 2.3  |
| M31837 | insulin-like growth factor binding protein 3                                                                       | 15   | 11.8 |
| M31838 | Tachykinin 2 (substance K) receptor                                                                                | 8.3  | 2.1  |
| M31931 | cytochrome P450, subfamily 2G, polypeptide 1                                                                       | 19.8 | 13.3 |
| M32061 | adrenergic receptor, alpha 2b                                                                                      | 17.1 | 8.1  |
| M32167 | vascular endothelial growth factor                                                                                 | 11.6 | 6    |
| M32167 | vascular endothelial growth factor                                                                                 | 3.2  | 3.6  |
| M32397 | acid phosphatase, prostate                                                                                         | 7.6  | 5.6  |
| M32397 | acid phosphatase, prostate                                                                                         | 6.3  | 1.6  |
| M32474 | carcinoembryonic antigen-related cell adhesion molecule 3                                                          | 2.8  | 2.9  |
| M32475 | carcinoembryonic antigen-related protein                                                                           | 12.7 | 9.2  |
| M32475 | carcinoembryonic antigen-related protein                                                                           | 1    | 0.2  |
| M32725 | dorsal protein 1                                                                                                   | 2.4  | 0.7  |

|        |                                                                                             |       |       |
|--------|---------------------------------------------------------------------------------------------|-------|-------|
| M32754 | Inhibin, alpha                                                                              | 80.1  | 47.8  |
| M32757 | inhibin beta-B-subunit                                                                      | 24.5  | 15.7  |
| M32783 | dynorphin gene                                                                              | 349.9 | 57.7  |
| M32867 | potassium voltage gated channel, shaker related subfamily, member 4                         | 8.7   | 11.3  |
| M33025 | parathymosin                                                                                | 11.7  | 8.4   |
| M33201 | surfactant, pulmonary-associated protein A1                                                 | 4.2   | 2.8   |
| M33296 | cytochrome P450, subfamily 2G, polypeptide 1                                                | 3.7   | 1     |
| M33312 | Cytochrome P450 IIA1 (hepatic steroid hydroxylase IIA1) gene                                | 254.5 | 102   |
| M33329 | sulfotransferase family, cytosolic, 2A, dehydroepiandrosterone (DHEA) -preferring, member 1 | 11.5  | 3     |
| M33528 | phosducin                                                                                   | 1.9   | 1.5   |
| M33550 | Cytochrom P450 15-beta gene                                                                 | 6.9   | 8.2   |
| M33605 | cytolysin                                                                                   | 10.4  | 7.8   |
| M33648 | 3-hydroxy-3-methylglutaryl-Coenzyme A synthase 2                                            | 5.1   | 1.7   |
| M33648 | 3-hydroxy-3-methylglutaryl-Coenzyme A synthase 2                                            | 3.5   | 1.9   |
| M33746 | UDP-glucuronosyltransferase 2 family, member 5                                              | 28.4  | 11    |
| M33747 | UDP-glucuronosyltransferase 2 family, member 5                                              | 17.5  | 13.7  |
| M33822 | gamma-glutamyl transpeptidase                                                               | 2.1   | 0.7   |
| M33936 | cytochrome P450 4A3                                                                         | 28.9  | 25.1  |
| M33962 | protein tyrosine phosphatase, non-receptor type 1                                           | 26.9  | 12.4  |
| M33976 | salivary protein 1                                                                          | 11.2  | 5.3   |
| M33986 | cytochrome P450, subfamily 19                                                               | 7.8   | 6.7   |
| M34083 | prolactin receptor                                                                          | 5.2   | 3.6   |
| M34097 | granzyme B                                                                                  | 32.9  | 19.3  |
| M34112 | parathyroid hormone-like peptide (PLP)                                                      | 18.1  | 8     |
| M34134 | tropomyosin 1, alpha                                                                        | 137.6 | 53.2  |
| M34176 | adaptor-related protein complex 2, beta 1 subunit                                           | 49.4  | 15.7  |
| M34253 | Interferon regulatory factor 1                                                              | 39.5  | 8.6   |
| M34253 | Interferon regulatory factor 1                                                              | 17.7  | 14.2  |
| M34384 | Nestin                                                                                      | 38.4  | 19.9  |
| M34643 | neurotrophin-3 (HDNF/NT-3)                                                                  | 106.4 | 56    |
| M34842 | Thyroid stimulating hormone receptor                                                        | 3.8   | 2.7   |
| M35077 | dopamine receptor 1A                                                                        | 3.6   | 3.1   |
| M35104 | v-ros UR2 sarcoma virus oncogene homolog 1 (avian)                                          | 5.5   | 2.1   |
| M35162 | gamma-aminobutyric acid A receptor, delta                                                   | 35.2  | 8.9   |
| M35270 | alanine-glyoxylate aminotransferase                                                         | 73.1  | 70.1  |
| M35297 | G protein coupled receptor Rca                                                              | 17.3  | 14.2  |
| M35299 | serine protease inhibitor, Kazal type 1                                                     | 7.5   | 2.9   |
| M35535 | ATPase, H+/K+ transporting, beta polypeptide                                                | 2.5   | 0.9   |
| M35862 | Male germ cell-associated kinase                                                            | 11.2  | 12.3  |
| M35965 | Thyroglobulin                                                                               | 14.3  | 9.2   |
| M36074 | nuclear receptor subfamily 3, group C, member 2                                             | 27.1  | 24.5  |
| M36074 | nuclear receptor subfamily 3, group C, member 2                                             | 15    | 13.2  |
| M36151 | MHC class II A-beta RT1.B-b-beta                                                            | 16.2  | 14    |
| M36151 | Rat mRNA for MHC class II antigen RT1.B-1 beta-chain                                        | 0.9   | 0.8   |
| M36317 | Trytrotropin releasing hormone                                                              | 44.2  | 15.3  |
| M36410 | sepiapterin reductase                                                                       | 51    | 14.9  |
| M36410 | sepiapterin reductase                                                                       | 5.9   | 1.8   |
| M36418 | glutamate receptor, ionotropic, AMPA1 (alpha 1)                                             | 4.3   | 2.7   |
| M36419 | glutamate receptor, ionotropic, 2                                                           | 21.9  | 12.3  |
| M36420 | glutamate receptor, ionotropic, AMPA3 (alpha 3)                                             | 8.1   | 5.3   |
| M36421 | glutamate receptor, ionotropic, 4                                                           | 9.1   | 5.7   |
| M36804 | follicle - stimulating hormone subunit beta                                                 | 11.8  | 8.5   |
| M37394 | epidermal growth factor receptor                                                            | 9.8   | 7.5   |
| M37482 | inhibin beta-A                                                                              | 40.8  | 18.7  |
| M37566 | homeobox protein R1b                                                                        | 15.3  | 9.5   |
| M37567 | homeobox protein R3                                                                         | 6.8   | 2.7   |
| M37568 | homeobox protein R4                                                                         | 10.8  | 8.4   |
| M37569 | homeobox protein R6                                                                         | 16.2  | 20.1  |
| M37828 | cytochrome P450, 4a12                                                                       | 61.2  | 52.4  |
| M37897 | interleukin 10                                                                              | 8.6   | 4.5   |
| M37941 | Adenosine monophosphate deaminase 1                                                         | 16.9  | 11.4  |
| M37942 | adenosine monophosphate deaminase 1 (AMPD1)                                                 | 2.3   | 1.8   |
| M38061 | glutamate receptor, ionotropic, 2                                                           | 6.6   | 5     |
| M38566 | cytochrome P450, family 27, subfamily a, polypeptide 1                                      | 15.3  | 14.8  |
| M38653 | gastrin                                                                                     | 2.6   | 0.8   |
| M38759 | Histidine decarboxylase                                                                     | 6.3   | 6.5   |
| M54987 | corticotropin releasing hormone                                                             | 6.6   | 3.5   |
| M55017 | nucleolin gene                                                                              | 14.5  | 7.9   |
| M55049 | Interleukin 2 receptor, alpha chain                                                         | 10.7  | 4.6   |
| M55050 | Interleukin 2 receptor, beta chain                                                          | 10.1  | 12    |
| M55075 | adenylate cyclase 3                                                                         | 60.2  | 33.6  |
| M55250 | glycine receptor, alpha 3                                                                   | 9.3   | 5.4   |
| M55291 | neurotrophic tyrosine kinase, receptor, type 2                                              | 14.1  | 9.1   |
| M55293 | neurotrophic tyrosine kinase, receptor, type 2                                              | 16.1  | 11.9  |
| M55417 | protein kinase C-gamma                                                                      | 338.6 | 126.4 |
| M55532 | Kupffer cell receptor                                                                       | 13.8  | 8.6   |
| M55636 | guanylate cyclase 2C                                                                        | 8.6   | 1.5   |
| M57263 | transglutaminase 1                                                                          | 5     | 4.1   |
| M57507 | guanylate cyclase, soluble, beta 2                                                          | 16.4  | 9.6   |



|        |                                                                                                     |       |       |
|--------|-----------------------------------------------------------------------------------------------------|-------|-------|
| M57672 | gamma-glutamyltransferase gene                                                                      | 19.9  | 10.7  |
| M57682 | calcium channel, voltage-dependent, L type, alpha 1D subunit                                        | 9.3   | 6.4   |
| M57705 | Thyroid peroxidase                                                                                  | 90.8  | 29.5  |
| M57705 | truncated thyroid peroxidase                                                                        | 13.7  | 21.3  |
| M57718 | cytochrome P-450 IV A1 (CYP4A1)                                                                     | 20.9  | 20.3  |
| M57728 | Rat general mitochondrial matrix processing protease (MPP) mRNA, 3' end                             | 15.1  | 8.9   |
| M58041 | cytochrome P450 2c22                                                                                | 14.4  | 9.3   |
| M58169 | Rat prostatic 22-kD glycoprotein mRNA, complete cds                                                 | 3.5   | 2.3   |
| M58169 | Rat prostatic 22-kD glycoprotein mRNA, complete cds                                                 | 3.1   | 3.2   |
| M58287 | Sterol carrier protein 2, liver                                                                     | 5.1   | 3.6   |
| M58308 | histidine ammonia lyase                                                                             | 14.7  | 13.2  |
| M58364 | GTP cyclohydrolase 1                                                                                | 10    | 9.7   |
| M58369 | Pancreatic lipase                                                                                   | 25    | 16    |
| M58370 | colipase                                                                                            | 42.2  | 16.6  |
| M58495 | NAD(P)H: quinone reductase                                                                          | 13.1  | 12.6  |
| M58587 | interleukin 6 receptor                                                                              | 31.8  | 8.9   |
| M58634 | insulin-like growth factor binding protein 1                                                        | 7.7   | 3.8   |
| M58677 | outer dense fiber of sperm tails 1                                                                  | 8.8   | 2.7   |
| M58716 | secretory (zymogen) granule membrane glycoprotein GP2                                               | 8.4   | 8.6   |
| M58758 | ATPase, H+ transporting, lysosomal noncatalytic accessory protein 1a                                | 79.6  | 43.3  |
| M59211 | potassium voltage gated channel, Shaw-related subfamily, member 2                                   | 7     | 8.1   |
| M59313 | potassium voltage gated channel, Shaw-related subfamily, member 2                                   | 11.4  | 7.7   |
| M59460 | liver glycogen phosphorylase                                                                        | 11.1  | 10.8  |
| M59786 | calcium channel, voltage-dependent, alpha 1C subunit                                                | 20.7  | 18.4  |
| M59814 | Eph receptor B2                                                                                     | 40.3  | 7.2   |
| M59861 | 10-formyltetrahydrofolate dehydrogenase                                                             | 12.6  | 11    |
| M59980 | potassium voltage gated channel, Shal-related family, member 2                                      | 5.1   | 1.8   |
| M60103 | protein tyrosine phosphatase, receptor type, F                                                      | 11    | 7.6   |
| M60322 | Aldehyde reductase 1 (low Km aldose reductase) (5.8 kb PstI fragment, probably the functional gene) | 13.4  | 12.3  |
| M60388 | hemiferrin, transferrin-like protein                                                                | 3.4   | 4.3   |
| M60616 | matrix metalloproteinase 13                                                                         | 3.7   | 1.8   |
| M60617 | nuclear transcription factor - Y beta                                                               | 6.8   | 4.6   |
| M60617 | nuclear transcription factor - Y beta                                                               | 6.6   | 3.2   |
| M60654 | adrenergic receptor, alpha 1d                                                                       | 4.9   | 3.5   |
| M60655 | adrenergic receptor, alpha 1b                                                                       | 24.3  | 27.5  |
| M60666 | tropomyosin 1, alpha                                                                                | 11.6  | 7.2   |
| M60737 | S-antigen                                                                                           | 9.5   | 2.4   |
| M60786 | Endothelin receptor type A                                                                          | 7.3   | 2.8   |
| M60811 | (LxRN1) LINE 1 repeat element, ORF II                                                               | 20.5  | 5.3   |
| M60921 | B-cell translocation gene 2                                                                         | 46.8  | 16.9  |
| M60921 | B-cell translocation gene 2                                                                         | 10    | 5.4   |
| M61099 | glutamate receptor, metabotropic 1                                                                  | 3.2   | 1.9   |
| M61142 | thimet oligopeptidase 1                                                                             | 23.6  | 19    |
| M61177 | mitogen activated protein kinase 3                                                                  | 163.3 | 47.1  |
| M61211 | Luteinizing hormone/choriogonadotropin receptor                                                     | 22.4  | 11.3  |
| M61219 | Prohibitin                                                                                          | 24.5  | 18.4  |
| M61219 | Prohibitin                                                                                          | 7.1   | 2.2   |
| M61725 | transcription factor UBF                                                                            | 9.4   | 8.7   |
| M62372 | alpha-2-adrenergic receptor protein (RG20)                                                          | 5.1   | 2.8   |
| M62388 | ubiquitin conjugating enzyme                                                                        | 42.5  | 21.1  |
| M62388 | ubiquitin conjugating enzyme                                                                        | 26.4  | 20.2  |
| M62641 | Pro-melanin-concentrating hormone                                                                   | 6.6   | 2.5   |
| M62642 | hemopexin                                                                                           | 16.1  | 9.2   |
| M62752 | statin-like                                                                                         | 6.6   | 5.7   |
| M62763 | Sterol carrier protein 2, liver                                                                     | 20.2  | 7.4   |
| M62781 | insulin-like growth factor-binding protein 5                                                        | 19.8  | 17.5  |
| M62832 | plasminogen                                                                                         | 2.7   | 0.9   |
| M62889 | Sucrase-isomaltase                                                                                  | 12.9  | 20.5  |
| M62891 | Killer cell lectin-like receptor subfamily B, member 1b                                             | 29    | 28.5  |
| M62891 | Killer cell lectin-like receptor subfamily B, member 1b                                             | 12.4  | 8.5   |
| M62930 | regeneration protein, lithostatin, pancreatic stone protein                                         | 19.3  | 14.6  |
| M63006 | adenylate cyclase activating polypeptide 1                                                          | 10.8  | 7.9   |
| M63101 | interleukin 1 receptor antagonist gene                                                              | 4.2   | 0.9   |
| M63122 | tumor necrosis factor receptor superfamily, member 1a                                               | 15.1  | 7.3   |
| M63333 | calmodulin-dependent protein kinase(CaM kinase-GR)                                                  | 3.3   | 1.6   |
| M63574 | selenoprotein P, plasma, 1                                                                          | 6.6   | 7.1   |
| M63656 | aldolase C, fructose-biphosphate                                                                    | 7.1   | 3.2   |
| M63662 | peptidylglycine alpha-amidating monooxygenase (rPAM-4 type)                                         | 4.2   | 1.3   |
| M63665 | cytokeratin 21                                                                                      | 4     | 2.4   |
| M63901 | Secretory granule neuroendocrine, protein 1 (7B2 protein)                                           | 11.1  | 10    |
| M63901 | Secretory granule neuroendocrine, protein 1 (7B2 protein)                                           | 9.5   | 6.4   |
| M63926 | Luteinizing hormone/choriogonadotropin receptor                                                     | 105.8 | 148.3 |
| M63991 | serine (or cysteine) proteinase inhibitor, clade A (alpha-1 antiproteinase, antitrypsin), member 7  | 5.2   | 5.4   |
| M64033 | Secretin                                                                                            | 9.9   | 5.5   |
| M64092 | protein kinase (cAMP dependent, catalytic) inhibitor beta                                           | 6.7   | 6.2   |
| M64236 | Tachykinin 1 receptor                                                                               | 4.1   | 1.8   |
| M64299 | adenosine A1 receptor                                                                               | 38.2  | 14.4  |
| M64300 | mitogen activated protein kinase 1                                                                  | 10.5  | 9.8   |
| M64301 | mitogen-activated protein kinase 6                                                                  | 5.3   | 5.3   |

|        |                                                                                                                                                      |       |      |
|--------|------------------------------------------------------------------------------------------------------------------------------------------------------|-------|------|
| M64377 | olfactory protein                                                                                                                                    | 41.2  | 27   |
| M64378 | olfactory protein                                                                                                                                    | 86.4  | 16   |
| M64381 | olfactory protein                                                                                                                                    | 49    | 30.3 |
| M64385 | olfactory receptor 41                                                                                                                                | 15.9  | 8.5  |
| M64386 | olfactory receptor 41                                                                                                                                | 18.9  | 14   |
| M64391 | olfactory receptor 41                                                                                                                                | 24.4  | 6.4  |
| M64488 | synaptotagmin 2                                                                                                                                      | 3.3   | 2    |
| M64698 | inositol 1,4,5-triphosphate receptor 1                                                                                                               | 11.2  | 19.8 |
| M64699 | inositol 1,4,5-triphosphate receptor 1                                                                                                               | 2.3   | 0.3  |
| M64711 | endothelin 1                                                                                                                                         | 3.8   | 1.2  |
| M64733 | TRPM-2 gene                                                                                                                                          | 62.5  | 28.6 |
| M64755 | cysteine-sulfinate decarboxylase                                                                                                                     | 7.2   | 7    |
| M64780 | Agrin                                                                                                                                                | 51.1  | 17.6 |
| M64780 | Agrin                                                                                                                                                | 25.7  | 16.2 |
| M64785 | arginine vasopressin                                                                                                                                 | 16.9  | 6.3  |
| M64785 | arginine vasopressin                                                                                                                                 | 6.2   | 4.9  |
| M64791 | salivary proline-rich protein (RP4) gene                                                                                                             | 17.8  | 13.3 |
| M64792 | salivary proline-rich protein (RP13) gene                                                                                                            | 8.5   | 7.3  |
| M64793 | salivary proline-rich protein (RP15) gene,                                                                                                           | 27.8  | 12.1 |
| M64795 | MHC class I antigen gene (RT1-u haplotype)                                                                                                           | 143.9 | 79   |
| M64795 | MHC class I antigen gene (RT1-u haplotype)                                                                                                           | 29.6  | 22.3 |
| M64797 | 6-phosphofructo-2-kinase/fructose-2,6-biphosphatase 4                                                                                                | 55.5  | 40.7 |
| M64862 | matrin F/G 1                                                                                                                                         | 13.3  | 8.7  |
| M64867 | 5-hydroxytryptamine (serotonin) receptor 2A                                                                                                          | 4.5   | 6.4  |
| M65148 | RATF2                                                                                                                                                | 7     | 7.8  |
| M65149 | CCAAT/enhancerbinding, protein (C/EBP) delta                                                                                                         | 27.2  | 16.3 |
| M65251 | human immunodeficiency virus type 1 enhancer-binding protein 2                                                                                       | 1.6   | 0.1  |
| M65253 | matrix metalloproteinase 10                                                                                                                          | 2.4   | 0.7  |
| M67465 | hydroxy-delta-5-steroid dehydrogenase, 3 beta- and steroid delta-isomerase                                                                           | 15.3  | 7.3  |
| M68971 | Hexokinase 2                                                                                                                                         | 46.4  | 7.6  |
| M69055 | Transcribed sequence with strong similarity to protein pir:JN0464 (R.norvegicus) JN0464 insulin-like growth factor-binding protein 6 precursor - rat | 21.7  | 12.5 |
| M69118 | Dopamine receptor D5                                                                                                                                 | 17.6  | 12.8 |
| M69246 | serine (or cysteine) proteinase inhibitor, clade H, member 1                                                                                         | 5.8   | 4.2  |
| M72422 | Glutamate decarboxylase 2 (islet)                                                                                                                    | 20.5  | 12.6 |
| M72711 | POU domain, class 3, transcription factor 1                                                                                                          | 15.3  | 8.6  |
| M73049 | internexin, alpha                                                                                                                                    | 18.8  | 15.2 |
| M73486 | growth hormone releasing hormone                                                                                                                     | 6.8   | 5.9  |
| M73553 | lectin, galactose binding, soluble 4                                                                                                                 | 13.2  | 11.4 |
| M73701 | troponin 1, type 2                                                                                                                                   | 3.7   | 1.7  |
| M73714 | aldehyde dehydrogenase family 3, subfamily A2                                                                                                        | 9.7   | 7.2  |
| M73808 | phosphorylase kinase, gamma 2 (testis)                                                                                                               | 11    | 8.1  |
| M74054 | angiotensin receptor 1a                                                                                                                              | 2.3   | 1.3  |
| M74067 | claudin 3                                                                                                                                            | 4.9   | 3.6  |
| M74152 | prolactin receptor                                                                                                                                   | 10.3  | 10.3 |
| M74223 | VGF nerve growth factor inducible                                                                                                                    | 27.1  | 26.2 |
| M74439 | UDP glucuronosyltransferase                                                                                                                          | 268.4 | 82.4 |
| M74488 | Ca2+/calmodulin-dependent protein kinase                                                                                                             | 3.5   | 3.3  |
| M74494 | ATPase, Na+K+ transporting, alpha 1                                                                                                                  | 2.5   | 1.2  |
| M74776 | corticosteroid -binding globulin (CBG)                                                                                                               | 3.4   | 1.2  |
| M74898 | potassium voltage gated channel, Shal-related family, member 3                                                                                       | 6.2   | 6    |
| M75148 | kinesin light chain 1                                                                                                                                | 19.9  | 12.7 |
| M75168 | HLA-B-associated transcript 1A                                                                                                                       | 12.3  | 4.8  |
| M76110 | acid phosphatase 5                                                                                                                                   | 19.8  | 16.8 |
| M76426 | dipeptidylpeptidase 6                                                                                                                                | 13.6  | 12.1 |
| M76532 | gap junction membrane channel protein alpha 4                                                                                                        | 25.5  | 28.7 |
| M76533 | gap junction membrane channel protein beta 5                                                                                                         | 24.1  | 7.4  |
| M76534 | gap junction membrane channel protein alpha 6                                                                                                        | 10.4  | 11.7 |
| M76535 | gap junction membrane channel protein alpha 5                                                                                                        | 54.7  | 23.5 |
| M76535 | gap junction membrane channel protein alpha 5                                                                                                        | 34.7  | 10.7 |
| M76537 | prolactin-like protein C related                                                                                                                     | 21.9  | 12.2 |
| M76537 | prolactin-like protein C related                                                                                                                     | 5.3   | 5.7  |
| M76733 | odorant-metabolizing protein RY2D1                                                                                                                   | 7.1   | 5.8  |
| M76734 | odorant-binding protein                                                                                                                              | 25    | 20.2 |
| M76740 | Mucin3                                                                                                                                               | 31.3  | 11   |
| M76740 | Mucin3                                                                                                                                               | 25.5  | 8.3  |
| M77184 | parathyroid hormone receptor                                                                                                                         | 24.1  | 21.1 |
| M77245 | adaptor protein complex AP-1, beta 1 subunit                                                                                                         | 116   | 40.2 |
| M77246 | adaptor-related protein complex 2, beta 1 subunit                                                                                                    | 43.7  | 21.3 |
| M77362 | Ig non-productively rearranged lambda-chain                                                                                                          | 1.9   | 0.8  |
| M77479 | solute carrier family 10, member 1                                                                                                                   | 2.1   | 0.9  |
| M77482 | potassium voltage gated channel, Shab-related subfamily, member 2                                                                                    | 11.2  | 6.9  |
| M77694 | fumarylacetoacetate hydrolase                                                                                                                        | 11.4  | 7.8  |
| M77809 | transforming growth factor, beta receptor 3                                                                                                          | 28.5  | 25.4 |
| M77850 | 6-pyruvoyl-tetrahydropterin synthase                                                                                                                 | 23.5  | 11.3 |
| M80367 | guanylate binding protein 2, interferon-inducible                                                                                                    | 7     | 5.6  |
| M80545 | calcium channel, voltage-dependent, beta 2 subunit                                                                                                   | 4     | 2.2  |
| M80550 | adenylyl cyclase 2                                                                                                                                   | 67.7  | 24.8 |
| M80570 | solute carrier family 6, member 3                                                                                                                    | 13.8  | 15.5 |

|        |                                                                                                 |      |      |
|--------|-------------------------------------------------------------------------------------------------|------|------|
| M80633 | adenylyl cyclase 4                                                                              | 6.2  | 4.3  |
| M80784 | transforming growth factor, beta receptor 3                                                     | 3.8  | 2.1  |
| M80804 | solute carrier family 3, member 1                                                               | 32.1 | 17.4 |
| M80826 | trefoil factor 3                                                                                | 55.8 | 11.1 |
| M80829 | troponin T2                                                                                     | 29.4 | 18.8 |
| M81142 | GABA-alpha receptor gamma-3 subunit                                                             | 15.6 | 13.2 |
| M81183 | insulin-like growth factor I                                                                    | 11.7 | 6.2  |
| M81231 | surfactant, pulmonary-associated protein D                                                      | 18.7 | 18.4 |
| M81397 | coagulation factor 2                                                                            | 8.9  | 6.6  |
| M81642 | coagulation factor II receptor                                                                  | 50.3 | 18.8 |
| M81681 | biliverdin reductase A                                                                          | 45.6 | 44   |
| M81687 | syndecan 2                                                                                      | 9.3  | 5.8  |
| M81766 | nuclear receptor co-regulator 1                                                                 | 34.2 | 17.9 |
| M81783 | potassium voltage-gated channel, subfamily F, member 1                                          | 35.5 | 20.2 |
| M81784 | potassium voltage-gated channel subfamily G member 1                                            | 10   | 7.8  |
| M81855 | P-glycoprotein/multidrug resistance 1                                                           | 6    | 2    |
| M81920 | mucin-like                                                                                      | 6.4  | 5.9  |
| M82824 | neurofibromatosis protein type I                                                                | 9.5  | 10.1 |
| M82826 | neurofibromatosis protein type I                                                                | 26.9 | 32.3 |
| M82845 | Peptidylglycine alpha-amidating monooxygenase                                                   | 10.5 | 7.3  |
| M83107 | Transgelin (Smooth muscle 22 protein)                                                           | 10.9 | 2.4  |
| M83107 | Transgelin (Smooth muscle 22 protein)                                                           | 6.3  | 4.3  |
| M83143 | Sialyltransferase 1 (beta-galactoside alpha-2,6-sialyltransferase)                              | 26.4 | 8.4  |
| M83196 | microtubule-associated protein 1 A                                                              | 18.9 | 15   |
| M83209 | Parotid Secretory Protein                                                                       | 18.7 | 19.1 |
| M83210 | Neonatal submandibular gland protein B                                                          | 30.7 | 18.4 |
| M83210 | Neonatal submandibular gland protein B                                                          | 3.9  | 1.7  |
| M83298 | protein phosphatase 2 (formerly 2A), regulatory subunit B (PR 52), alpha isoform                | 14.1 | 1.9  |
| M83561 | Glutamate receptor, ionotropic, kainate 1                                                       | 5.1  | 6.6  |
| M83567 | proline-rich protein 15                                                                         | 18.9 | 8.5  |
| M83649 | tumor necrosis factor receptor superfamily, member 6                                            | 12.7 | 18.7 |
| M83675 | mel transforming oncogene (derived from cell line NK14)- RAB8 homolog                           | 19.7 | 13   |
| M83676 | RAB12, member RAS oncogene family                                                               | 23.4 | 13   |
| M83679 | RAB15                                                                                           | 15.7 | 11.2 |
| M83681 | RAB3D, member RAS oncogene family                                                               | 10.3 | 9    |
| M83740 | 6-pyruvoyl-tetrahydropterin synthase/dimerization cofactor of hepatocyte nuclear factor 1 alpha | 33.7 | 23.3 |
| M83745 | proprotein convertase subtilisin/kexin type 2                                                   | 14.9 | 9.6  |
| M83746 | proprotein convertase subtilisin/kexin type 2                                                   | 6.8  | 6.4  |
| M84009 | Dopamine receptor D4                                                                            | 21   | 24.2 |
| M84149 | IgH chain VJ region                                                                             | 1.1  | 0.9  |
| M84176 | myogenic differentiation 1                                                                      | 5.5  | 1.4  |
| M84203 | potassium voltage gated channel, Shaw-related subfamily, member 2                               | 10   | 11.8 |
| M84210 | potassium voltage gated channel, Shaw-related subfamily, member 3                               | 27.9 | 16.9 |
| M84361 | CSF-1 protein                                                                                   | 26.9 | 22.1 |
| M84488 | Vascular cell adhesion molecule 1                                                               | 2.2  | 1.3  |
| M84648 | liver-specific aromatic L-amino acid decarboxylase gene, exon 1a                                | 7.2  | 5.4  |
| M84719 | Flavin-containing monooxygenase 1                                                               | 7.1  | 5    |
| M84725 | transgelin 3                                                                                    | 59.5 | 27.9 |
| M85183 | angiotensin/vasopressin receptor                                                                | 9.5  | 6.5  |
| M85193 | RT6.2 mRNA,                                                                                     | 31.3 | 19.4 |
| M85214 | trk precursor                                                                                   | 51.9 | 27.2 |
| M85299 | solute carrier family 9, member 1                                                               | 9.9  | 9.6  |
| M85300 | solute carrier family 9, member 3                                                               | 10.3 | 7.9  |
| M85301 | solute carrier family 9, member 4                                                               | 6.9  | 6.5  |
| M86235 | Ketohexokinase                                                                                  | 60   | 22.9 |
| M86240 | fructose-1,6- biphosphatase 1                                                                   | 5.1  | 2.1  |
| M86341 | ADP-ribosylarginine hydrolase                                                                   | 29.8 | 10.1 |
| M86341 | ADP-ribosylarginine hydrolase                                                                   | 3.5  | 0.6  |
| M86389 | heat shock 27kDa protein 1                                                                      | 70.7 | 43.7 |
| M86514 | Rat proline-rich protein mRNA, 3' end                                                           | 7.6  | 5.2  |
| M86621 | calcium channel, voltage-dependent, alpha2/delta subunit 1                                      | 9.9  | 10.4 |
| M86742 | Neurotrophin 5 (neurotrophin 4/5)                                                               | 19.6 | 16.6 |
| M86758 | sulfotransferase, estrogen preferring                                                           | 3.9  | 2.5  |
| M86870 | protein disulfide isomerase related protein (calcium-binding protein, intestinal-related)       | 12.3 | 8.3  |
| M86912 | angiotensin receptor (AT1)                                                                      | 12.5 | 5.5  |
| M86912 | angiotensin receptor (AT1)                                                                      | 2.1  | 0.8  |
| M87067 | activin receptor IIB                                                                            | 51.5 | 26.3 |
| M87634 | forkhead box O1                                                                                 | 3    | 1.7  |
| M87786 | immunoglobulin light chain variable region                                                      | 8.2  | 5    |
| M87787 | immunoglobulin heavy chain variable region, complementarity-determining regions mRNA            | 3.9  | 1.5  |
| M87787 | immunoglobulin heavy chain variable region, complementarity-determining regions mRNA            | 1.9  | 1.7  |
| M87855 | adrenergic receptor kinase, beta 2                                                              | 13.2 | 11.8 |
| M88111 | proline transporter                                                                             | 25.4 | 17.8 |
| M88347 | Cystathionine beta synthase                                                                     | 87.4 | 39.3 |
| M88469 | f-spondin                                                                                       | 6.2  | 3.9  |
| M88488 | choline acetyltransferase gene                                                                  | 21.8 | 9.6  |
| M88592 | Peroxisome proliferator activated receptor alpha                                                | 8    | 7.2  |
| M88601 | Meprin 1 beta                                                                                   | 3.7  | 1.8  |
| M88709 | opioid-binding protein/cell adhesion molecule-like                                              | 8.6  | 4.8  |

|        |                                                                                   |      |      |
|--------|-----------------------------------------------------------------------------------|------|------|
| M88751 | calcium channel, voltage-dependent, beta 3 subunit                                | 23.3 | 12.4 |
| M89646 | ribosomal protein S24                                                             | 40.9 | 23.6 |
| M89906 | cystic fibrosis transmembrane conductance regulator homolog                       | 28.4 | 16.1 |
| M89924 | calcium channel, voltage-dependent, alpha 1C subunit                              | 33.5 | 16.8 |
| M89945 | farnesyl diphosphate synthase                                                     | 31.7 | 10.7 |
| M89945 | farnesyl diphosphate synthase                                                     | 27   | 13.1 |
| M89953 | 5-HT1D serotonin receptor gene                                                    | 40.1 | 25.8 |
| M89954 | 5-hydroxytryptamine (serotonin ) receptor 1B                                      | 3.9  | 1.4  |
| M90065 | angiotensin II type-1 receptor                                                    | 22.1 | 11.8 |
| M90065 | angiotensin II type-1 receptor                                                    | 2.2  | 1.1  |
| M90310 | dorsal protein 1                                                                  | 5.9  | 5    |
| M90398 | ATPase, H+/K+ transporting, nongastric, alpha polypeptide                         | 11.6 | 8.4  |
| M90514 | DNA fragment homologous to Drosophila pecanex locus                               | 9.8  | 8.2  |
| M90518 | glutamate receptor, metabotropic 4                                                | 42.1 | 23.1 |
| M90660 | insulin receptor-related receptor-alpha subunit gene                              | 13.8 | 6.1  |
| M90660 | insulin receptor-related receptor-alpha subunit gene                              | 6.5  | 7.3  |
| M90661 | insulin receptor-related receptor                                                 | 1.3  | 0.6  |
| M91234 | Rat VL30 element mRNA                                                             | 23.6 | 17.6 |
| M91235 | Rat VL30 element mRNA                                                             | 32.7 | 19.4 |
| M91450 | CDX1 homeoprotein (Cdx1)                                                          | 2    | 1.1  |
| M91466 | adenosine A2B receptor                                                            | 13   | 15.1 |
| M91589 | Arrestin, beta 1                                                                  | 5.1  | 2.5  |
| M91590 | Arrestin, beta 2                                                                  | 58.5 | 36.4 |
| M91595 | insulin-like growth factor binding protein-2                                      | 32.6 | 8.4  |
| M91599 | fibroblast growth factor receptor subtype 4                                       | 24.4 | 14   |
| M91599 | fibroblast growth factor receptor subtype 4                                       | 13.5 | 15.3 |
| M91808 | sodium channel, voltage-gated, type I, beta polypeptide                           | 27.6 | 13.1 |
| M92042 | N-deacetylase/N-sulfotransferase (heparan glucosaminyl) 1                         | 19.3 | 9.8  |
| M92059 | adipsin                                                                           | 59.7 | 17.4 |
| M92074 | troponin 1, type 3                                                                | 14.3 | 11.2 |
| M92074 | troponin 1, type 3                                                                | 2.3  | 0.6  |
| M92075 | glutamate receptor, metabotropic 2                                                | 4.7  | 2.4  |
| M92076 | glutamate receptor, metabotropic 3                                                | 4.5  | 2.6  |
| M92340 | Interleukin 6 signal transducer                                                   | 4.8  | 6.6  |
| M92430 | neuregulin 1                                                                      | 9.8  | 9.6  |
| M92433 | NGFI-C gene,                                                                      | 15.6 | 10.3 |
| M92905 | calcium channel, voltage-dependent, N type, alpha 1B subunit                      | 12.7 | 7.7  |
| M92916 | Glucose-dependent insulinotropic peptide                                          | 27.6 | 36.6 |
| M92919 | phosphorylase B kinase alpha subunit                                              | 19.1 | 12.6 |
| M93017 | ATPase, Ca++-sequestering                                                         | 17.2 | 9.4  |
| M93271 | branched chain keto acid dehydrogenase kinase                                     | 26.8 | 12.3 |
| M93273 | somatostatin receptor 2                                                           | 9.7  | 9.3  |
| M93638 | keratin complex 2, basic, gene 5                                                  | 7.1  | 4.7  |
| M93661 | notch gene homolog 2, (Drosophila)                                                | 12.2 | 10   |
| M93669 | secretogranin 2                                                                   | 11.2 | 8.6  |
| M94043 | Rab38, member of RAS oncogene family                                              | 10.3 | 9    |
| M94064 | methyl CpG binding protein 2                                                      | 5.2  | 3.4  |
| M94287 | nucleolar phosphoprotein p130                                                     | 13.1 | 9.4  |
| M94454 | mitogen-activated protein kinase kinase kinase 8                                  | 7.8  | 3.4  |
| M94537 | phosphodiesterase 1B                                                              | 25.7 | 19.2 |
| M94548 | cytochrome P450, subfamily IVF, polypeptide 14 (leukotriene B4 omega hydroxylase) | 12.7 | 18.7 |
| M94557 | Rat specific single stranded DNA binding protein mRNA, complete cds               | 21.2 | 11.9 |
| M94918 | hemoglobin beta chain complex                                                     | 12.8 | 6.5  |
| M94919 | beta-globin gene                                                                  | 14.4 | 11.6 |
| M95058 | steroid 5-alpha-reductase 2                                                       | 2.6  | 0.8  |
| M95493 | guanylate cyclase activator 2A                                                    | 10.1 | 5    |
| M95578 | Interleukin 1 receptor, type I                                                    | 12.1 | 8.7  |
| M95578 | Interleukin 1 receptor, type I                                                    | 8.6  | 9.2  |
| M95591 | farnesyl diphosphate farnesyl transferase 1                                       | 12.9 | 5.9  |
| M95591 | farnesyl diphosphate farnesyl transferase 1                                       | 4.9  | 2    |
| M95735 | syntaxin 1B2                                                                      | 61.8 | 33.1 |
| M95762 | solute carrier family 6 (neurotransmitter transporter, GABA), member 13           | 19   | 9.8  |
| M95780 | G protein gamma-5 subunit                                                         | 5.6  | 4.6  |
| M95791 | transcription factor EF1(A)                                                       | 24.7 | 17.1 |
| M96159 | adenylate cyclase 5                                                               | 11.3 | 4.1  |
| M96375 | neurexin 1                                                                        | 2.8  | 2    |
| M96376 | neurexin 2                                                                        | 12.4 | 6.4  |
| M96548 | zinc finger protein 354A                                                          | 11.2 | 8.5  |
| M96626 | ATPase, Ca++ transporting, plasma membrane 3                                      | 13.1 | 14   |
| M96626 | ATPase, Ca++ transporting, plasma membrane 3                                      | 9.3  | 6.5  |
| M96633 | mitochondrial intermediate peptidase                                              | 13.5 | 9.4  |
| M96643 | transforming growth factor beta-2                                                 | 55.7 | 14.6 |
| M96674 | glucagon receptor                                                                 | 19.8 | 10.4 |
| M97161 | chondroitin sulfate proteoglycan 3                                                | 6.3  | 1.5  |
| M97197 | peroxisome proliferator responsive element                                        | 5.1  | 1.1  |
| M97255 | trefoil factor 2 (spasmolytic protein 1)                                          | 11.8 | 8.8  |
| M97380 | solute carrier family 18, member 1                                                | 4    | 1.7  |
| M97656 | somatostatin receptor 1                                                           | 0.7  | 0.2  |
| M97754 | sialyltransferase 6                                                               | 1.9  | 1.1  |

|        |                                                                              |       |       |
|--------|------------------------------------------------------------------------------|-------|-------|
| M98049 | pancreatitis-associated protein                                              | 2.1   | 1.8   |
| M98327 | Valyl-tRNA synthetase 2                                                      | 3.3   | 1.9   |
| M98819 | adenosine monophosphate deaminase 1 (AMPD1)                                  | 6     | 2.6   |
| M98826 | Phosphorylase kinase, gamma 1                                                | 33.3  | 12.5  |
| M98826 | phosphorylase kinase gene                                                    | 3.4   | 2.1   |
| M99169 | S6 protein kinase (Rsk-1)                                                    | 42.8  | 29.2  |
| M99221 | calcium channel, voltage-dependent, L type, alpha 1D subunit                 | 8.5   | 7.1   |
| M99222 | calcium channel, voltage-dependent, alpha 1A subunit                         | 14.5  | 10.3  |
| M99223 | ATPase, Ca++ transporting, cardiac muscle, fast twitch 1                     | 19.4  | 11.8  |
| M99418 | cholecystokinin B receptor                                                   | 24.5  | 15.7  |
| M99485 | Myelin oligodendrocyte glycoprotein                                          | 12.6  | 7.7   |
| M99567 | phospholipase C, beta 3                                                      | 15.6  | 16.3  |
| M99567 | phospholipase C, beta 3                                                      | 1.4   | 0.4   |
| S35751 | 3-alpha-hydroxysteroid dehydrogenase                                         | 5.1   | 4.4   |
| S37461 | angiotensin II type-1 receptor                                               | 2.8   | 1     |
| S39221 | NMDA receptor (alternatively spliced)                                        | 9.8   | 7.2   |
| S39221 | NMDA receptor (alternatively spliced)                                        | 8.7   | 13    |
| S39779 | preproendothelin-3                                                           | 5.1   | 1.9   |
| S40669 | proprotein convertase subtilisin/kexin type 2                                | 8.6   | 14    |
| S40803 | Luteinizing hormone/choriogonadotropin receptor                              | 13.7  | 9.5   |
| S43408 | Meprin 1 alpha                                                               | 6.7   | 4.3   |
| S44606 | Integrin beta 7                                                              | 31.4  | 30.2  |
| S45812 | monoamine oxidase A                                                          | 26.3  | 10.9  |
| S46131 | dopamine receptor 1A                                                         | 10.3  | 10.6  |
| S46131 | dopamine receptor 1A                                                         | 5.9   | 4.4   |
| S46785 | insulin-like growth factor binding protein complex acid-labile subunit       | 31.6  | 14.1  |
| S46785 | insulin-like growth factor binding protein, acid labile subunit              | 26.5  | 15.3  |
| S48142 | T-kininogenase=kallikrein homolog                                            | 2.1   | 0.4   |
| S48190 | type II activin receptor                                                     | 9     | 6.5   |
| S48325 | cytochrome P450, subfamily 2E, polypeptide 1                                 | 32    | 5.8   |
| S48813 | adrenergic receptor kinase, beta 1                                           | 21.1  | 4.9   |
| S49003 | short isoform growth hormone receptor                                        | 23.5  | 21.8  |
| S49400 | protein tyrosine phosphatase, non-receptor type 5                            | 9.1   | 8.5   |
| S49491 | preproenkephalin, related sequence                                           | 8.2   | 9.7   |
| S49760 | diacylglycerol kinase, alpha (80 kDa)                                        | 30.7  | 7.7   |
| S49760 | diacylglycerol kinase, alpha (80 kDa)                                        | 18.9  | 13.5  |
| S50879 | acetylcholinesterase                                                         | 29.5  | 19.7  |
| S50879 | acetylcholinesterase                                                         | 1.5   | 1.1   |
| S52128 | estrogen receptor                                                            | 4.5   | 2     |
| S52878 | fatty acid binding protein 6                                                 | 4     | 3.3   |
| S53527 | S100 calcium-binding protein, beta (neural)                                  | 2.7   | 0.5   |
| S53913 | Transcription factor 12                                                      | 26.6  | 9.5   |
| S53987 | nicotinic receptor alpha 7 subunit                                           | 4.3   | 1.6   |
| S54212 | ciliary neurotrophic factor receptor alpha component                         | 43.1  | 6.6   |
| S55224 | MP20=integral membrane protein                                               | 21.6  | 9.9   |
| S55933 | gamma-aminobutyric acid (GABA-A) receptor, subunit alpha 4                   | 1.3   | 0.9   |
| S56141 | sodium-dependent neurotransmitter transporter                                | 3.8   | 1.5   |
| S56464 | hexokinase II                                                                | 39    | 29.1  |
| S56464 | hexokinase II                                                                | 23.4  | 21.3  |
| S56481 | adrenergic receptor, beta 3                                                  | 80    | 28.3  |
| S56508 | fatty acid Coenzyme A ligase, long chain 6                                   | 1.9   | 0.7   |
| S56679 | AMPA-selective glutamate receptor-A                                          | 24.3  | 10.9  |
| S56936 | bilirubin-specific UDP-glucuronosyltransferase                               | 11.9  | 8.1   |
| S57565 | Histamine H2 receptor                                                        | 19.5  | 11.8  |
| S57980 | Androgen regulated 20 kDa protein                                            | 1     | 0.9   |
| S58528 | integrin alpha v subunit                                                     | 9.9   | 7.7   |
| S58529 | integrin beta 3 subunit                                                      | 2.9   | 2.1   |
| S58644 | integrin beta 5 subunit                                                      | 303.5 | 126.8 |
| S59525 | gonadotropin-releasing hormone receptor                                      | 28.4  | 5.1   |
| S60054 | renin 1                                                                      | 15.3  | 10.3  |
| S60953 | neural receptor protein-tyrosine kinase                                      | 64.8  | 57    |
| S61865 | syndecan 1                                                                   | 1.9   | 0.5   |
| S61868 | syndecan 4                                                                   | 188.1 | 77.8  |
| S61868 | syndecan 4                                                                   | 148.5 | 57.2  |
| S61896 | angiotensin II type-1 receptor                                               | 27.2  | 15.1  |
| S61948 | smooth muscle myosin heavy chain isoform SM1A                                | 6.2   | 4.2   |
| S61960 | cysteine conjugate beta-lyase                                                | 33.7  | 17.1  |
| S62043 | 5-hydroxytryptamine (serotonin) receptor 6                                   | 9.4   | 4.7   |
| S62096 | Rab geranylgeranyl transferase, a subunit                                    | 9.5   | 6.7   |
| S62097 | Rab geranylgeranyl transferase component, subunit beta                       | 23.9  | 9.7   |
| S62516 | SA (alternatively spliced) [rats, mRNA Partial, 412 nt]                      | 6.7   | 6.8   |
| S62933 | neural receptor protein-tyrosine kinase                                      | 5.8   | 2.9   |
| S63167 | hydroxy-delta-5-steroid dehydrogenase, 3 beta- and steroid delta-isomerase 1 | 12.5  | 13.2  |
| S63358 | Wilms tumor 1                                                                | 26.5  | 10.6  |
| S63458 | alpha 1-VIII collagen                                                        | 8.6   | 6.3   |
| S63519 | membrane protein-73                                                          | 24.7  | 11    |
| S63521 | glucose-regulated protein GRP78                                              | 13.1  | 14.6  |
| S63521 | glucose-regulated protein GRP78                                              | 4.9   | 6.7   |
| S64044 | Progesterone receptor                                                        | 22.5  | 5.9   |

|        |                                                                                  |      |      |
|--------|----------------------------------------------------------------------------------|------|------|
| S64320 | Shal1=K+ channel polypeptide                                                     | 11.4 | 10.5 |
| S64924 | olfactory neuron-specific                                                        | 31.7 | 4.8  |
| S65091 | yclic AMP-regulated phosphoprotein                                               | 10.5 | 8.1  |
| S65091 | yclic AMP-regulated phosphoprotein                                               | 4.3  | 4.1  |
| S65355 | endothelin receptor type B                                                       | 13.6 | 8.4  |
| S65355 | endothelin receptor type B                                                       | 9.7  | 11   |
| S65555 | glutamate cysteine ligase, modifier subunit                                      | 7.4  | 9    |
| S65555 | glutamate cysteine ligase, modifier subunit                                      | 4    | 3.5  |
| S66024 | cAMP responsive element modulator                                                | 10.3 | 2.8  |
| S66024 | cAMP responsive element modulator                                                | 2.2  | 1    |
| S66184 | lysyl oxidase                                                                    | 3    | 5.1  |
| S66545 | putative alkaline phosphatase                                                    | 13.5 | 13.7 |
| S66618 | ATP-binding cassette, sub-family B (MDR/TAP), member 1A                          | 20.2 | 20.4 |
| S67316 | alpha 2-adrenergic receptor                                                      | 42.8 | 8.9  |
| S67435 | pancreatic and duodenal homeobox gene 1                                          | 13.3 | 9.9  |
| S67620 | collagen alpha 1(IX)                                                             | 4.7  | 2.7  |
| S67722 | prostaglandin-endoperoxide synthase 2                                            | 5.6  | 3.2  |
| S67769 | solute carrier family 8, member 1                                                | 22.6 | 11.8 |
| S67770 | transforming growth factor, beta receptor 2                                      | 9.7  | 8    |
| S67900 | 6-phosphofructo-2-kinase/fructose-2,6-bisphosphatase 2                           | 6.2  | 9.3  |
| S68245 | carbonic anhydrase 4                                                             | 15.7 | 17   |
| S68245 | carbonic anhydrase 4                                                             | 5.3  | 3.6  |
| S68284 | S1 progesterin receptor form B                                                   | 6.1  | 3.4  |
| S68578 | gonadotropin-releasing hormone receptor                                          | 7    | 6.5  |
| S68736 | myosin heavy chain                                                               | 6.3  | 3.8  |
| S68809 | S100 alpha                                                                       | 55.2 | 30.2 |
| S68944 | Na+/Cl(-)-dependent neurotransmitter transporter                                 | 33.9 | 8.4  |
| S68944 | Na+/Cl(-)-dependent neurotransmitter transporter                                 | 25.4 | 14.9 |
| S69160 | Thyrotropin releasing hormone receptor                                           | 93.3 | 63.4 |
| S69161 | Thyrotropin releasing hormone receptor                                           | 8.6  | 8.6  |
| S69206 | mast cell protease 1                                                             | 2.1  | 1.1  |
| S69329 | ISL1 transcription factor, LIM/homeodomain 1                                     | 15.1 | 12.4 |
| S69329 | ISL1 transcription factor, LIM/homeodomain 1                                     | 8.5  | 5.8  |
| S69361 | progesterone receptor B isoform                                                  | 5.3  | 7.3  |
| S69383 | arachidonate 12-lipoxygenase                                                     | 5.6  | 1.6  |
| S70011 | tricarboxylate carrier                                                           | 16.1 | 8.7  |
| S70011 | tricarboxylate carrier                                                           | 1.2  | 1.3  |
| S70364 | UDP-glucuronosyltransferase {isoenzyme}                                          | 3.3  | 1.3  |
| S70803 | clone p10.15 product [rats, osteosarcoma ROS17/2.8, mRNA, 737 nt]                | 52.8 | 27.6 |
| S70804 | clone p6.1 transcript [rats, osteosarcoma ROS17/2.8, mRNA Partial, 692 nt]       | 18.6 | 20.8 |
| S71196 | brain-derived neurotrophic factor                                                | 17.8 | 5.8  |
| S71201 | brain-derived neurotrophic factor                                                | 11.2 | 10.6 |
| S71523 | LIM homeobox protein 1                                                           | 3.2  | 2.4  |
| S71570 | Ca2+/calmodulin-dependent protein kinase II isoform gamma-b                      | 31.7 | 25.5 |
| S71597 | nitric oxide synthase 2                                                          | 21.5 | 13.1 |
| S72407 | laminin M subunit                                                                | 12.5 | 9.6  |
| S72505 | glutathione S-transferase, alpha 1                                               | 55.6 | 43   |
| S72506 | glutathione-S-transferase, alpha type2                                           | 3.2  | 3    |
| S72637 | tumor-suppressive gene                                                           | 14.1 | 8.1  |
| S73007 | synuclein, alpha                                                                 | 13.2 | 8.2  |
| S73007 | synuclein, alpha                                                                 | 8.4  | 9.4  |
| S73008 | synuclein, alpha                                                                 | 19.3 | 7.8  |
| S73009 | synuclein SYN3                                                                   | 5.1  | 4.3  |
| S73583 | glutamyl aminopeptidase                                                          | 4.3  | 2.4  |
| S73608 | putative G protein coupled receptor                                              | 9.6  | 5.5  |
| S74122 | B-cell leukemia/lymphoma 2                                                       | 5.6  | 2.7  |
| S74257 | 2c9 gene {clone 2C9 incert}                                                      | 78.2 | 51   |
| S74257 | Rattus norvegicus unknown mRNA sequence                                          | 10.5 | 7.8  |
| S74265 | microtubule-associated protein 2                                                 | 7.6  | 7.8  |
| S74351 | protein tyrosine phosphatase, non-receptor type 16                               | 9.2  | 8.1  |
| S74393 | Paired box homeotic gene 6                                                       | 2.7  | 3.6  |
| S74572 | Mg2+ dependent protein phosphatase beta isoform                                  | 17.4 | 9.4  |
| S74572 | Protein phosphatase type 1B (formely 2C), Mg-dependent, beta isoform             | 10.9 | 5.2  |
| S74702 | GPR1=G protein-coupled receptor 1                                                | 4.6  | 1.6  |
| S74898 | Prostaglandin F receptor                                                         | 48.6 | 31.4 |
| S74907 | myosin phosphatase, target subunit 1                                             | 6.5  | 10.2 |
| S75019 | antiquitin=26g turgor protein homolog                                            | 17.7 | 11.2 |
| S75019 | antiquitin=26g turgor protein homolog                                            | 6.9  | 1.5  |
| S75275 | vasa-like gene protein                                                           | 2.5  | 2.7  |
| S75280 | pre-mtHSP70=70 kda heat shock protein precursor                                  | 11.9 | 9.6  |
| S75359 | bone morphogenetic protein receptor, type 1A                                     | 11   | 14   |
| S75437 | R.norvegicus (F344/Crj) rearranged mRNA for T-cell receptor gamma chain (1474bp) | 9.4  | 8    |
| S75687 | solute carrier family 1, member 3                                                | 26.7 | 6.4  |
| S75730 | stearoyl-Coenzyme A desaturase 2                                                 | 6.9  | 8.7  |
| S75952 | glucagon-like peptide 1 receptor                                                 | 37.5 | 20.5 |
| S75960 | uromodulin                                                                       | 22.4 | 19.7 |
| S75991 | sodium channel, voltage-gated, type 6, alpha polypeptide                         | 39   | 20.1 |
| S75997 | nucleoporin p62 homolog                                                          | 12.1 | 11   |
| S76054 | cytokeratin-8                                                                    | 16.6 | 14.7 |

|        |                                                                                    |       |       |
|--------|------------------------------------------------------------------------------------|-------|-------|
| S76145 | solute carrier family 6, member 3                                                  | 40.1  | 17.3  |
| S76404 | ATPase, H+/K+ transporting, beta polypeptide                                       | 13.5  | 11.8  |
| S76466 | type I serine-threonine kinase receptor                                            | 18.1  | 13.4  |
| S76742 | X transporter protein 3                                                            | 13.3  | 7.2   |
| S76758 | BDNF=brain-derived neurotrophic factor                                             | 9.6   | 8.2   |
| S76799 | BDNF=brain-derived neurotrophic factor                                             | 24.3  | 18.8  |
| S77492 | BMP-3=bone morphogenetic protein 3                                                 | 11    | 13.1  |
| S77494 | lysyl oxidase                                                                      | 16.8  | 10.8  |
| S77528 | CCAAT/enhancer binding protein (C/EBP), beta                                       | 24.4  | 22.1  |
| S77556 | Discoidin domain receptor family, member 1                                         | 41.3  | 21.3  |
| S77585 | Ptk-3L=radiation-induced gene                                                      | 295.3 | 147.4 |
| S77863 | opioid receptor, mu 1                                                              | 31.4  | 11.6  |
| S77867 | G protein-coupled receptor 10                                                      | 6.8   | 7.1   |
| S77900 | myosin regulatory light chain isoform C                                            | 12.1  | 8.9   |
| S77900 | myosin regulatory light chain isoform C                                            | 10.9  | 4.4   |
| S78154 | ROMK2b=inwardly rectifying ATP-regulated K+ channel                                | 41.4  | 28.1  |
| S78215 | Protein phosphatase type 1 alpha, catalytic subunit                                | 161.2 | 80.9  |
| S78218 | Protein phosphatase 1, catalytic subunit, beta isoform                             | 14.8  | 11.2  |
| S78284 | bcl-xshort=apoptosis inducer                                                       | 37.4  | 17.9  |
| S78556 | grp75=75 kda glucose regulated protein                                             | 12.9  | 8.1   |
| S78687 | 3-hydroxy-3-methylglutaryl coenzyme A reductase gene                               | 10.6  | 10.3  |
| S78744 | protein S=activated protein C cofactor                                             | 16.8  | 8.7   |
| S79213 | phosphatase inhibitor-2=cytosolic regulatory subunit of type 1 protein phosphatase | 29.6  | 15.5  |
| S79241 | oxycytocin receptor                                                                | 13.9  | 12.1  |
| S79624 | natriuretic peptide receptor subtype C                                             | 4.8   | 5.8   |
| S79711 | CD3 gamma-chain                                                                    | 16.8  | 8.5   |
| S79711 | CD3 gamma-chain                                                                    | 3.3   | 1.3   |
| S79730 | Prepronociceptin (neuropeptide nociceptin) (N23K)                                  | 9.3   | 7     |
| S79760 | cyclin dependent kinase inhibitor 2B                                               | 18.9  | 9.7   |
| S79778 | alpha 2A-adrenergic receptor                                                       | 36    | 12.6  |
| S79797 | enzymatic glycosylation-regulating gene                                            | 6.7   | 5     |
| S79817 | HLF=hepatic leukemia factor isoform HLF43                                          | 18    | 12    |
| S79820 | HLF=hepatic leukemia factor alpha isoform                                          | 48.4  | 22.5  |
| S79820 | HLF=hepatic leukemia factor alpha isoform                                          | 1.5   | 0.4   |
| S79903 | opioid receptor, mu 1                                                              | 45.4  | 27.7  |
| S79903 | opioid receptor, mu 1                                                              | 10.8  | 4.2   |
| S79939 | Prm3=protamine                                                                     | 60.7  | 31.6  |
| S80127 | parathyroid hormone                                                                | 17.1  | 3.8   |
| S80345 | von Hippel-Lindau syndrome homolog                                                 | 7.6   | 4.7   |
| S80376 | G alpha olf=GTP-binding protein Golf alpha subunit                                 | 2.6   | 0.3   |
| S80379 | preprocaldecrin=serum calcium-decreasing factor                                    | 17    | 14.4  |
| S80431 | aldo-keto reductase family 1, member D1 (delta 4-3-ketosteroid-5-beta-reductase)   | 2.6   | 1.3   |
| S80456 | natriuretic peptide receptor 1                                                     | 27.4  | 7.3   |
| S80631 | immunoglobulin E {membrane-bound form}                                             | 21.5  | 7.1   |
| S81025 | UDP-galactose-N-acetylglucosamine beta-1,4-galactosyltransferase homolog           | 11.7  | 5.9   |
| S81289 | IgM kappa chain variable region {CDR1 to CDR3 region}                              | 15.6  | 6.7   |
| S81289 | IgM kappa chain variable region {CDR1 to CDR3 region}                              | 1     | 0.8   |
| S81433 | heme oxygenase-2                                                                   | 23.9  | 12    |
| S81448 | steroid 5 alpha-reductase 1                                                        | 4.8   | 2.8   |
| S81478 | protein tyrosine phosphatase, non-receptor type 16                                 | 6.8   | 5.3   |
| S81584 | transforming growth factor, beta receptor 1                                        | 24.8  | 11.6  |
| S81917 | cysteine string protein                                                            | 9.8   | 7.9   |
| S81924 | Otx1=homeobox                                                                      | 26.4  | 13.5  |
| S82229 | natriuretic peptide receptor 1                                                     | 40.4  | 12.5  |
| S82233 | rBSC2=Na-K-Cl cotransporter homolog                                                | 16.5  | 10.2  |
| S82489 | interleukin 12b                                                                    | 22.4  | 16.4  |
| S82500 | breast cancer 1                                                                    | 4.2   | 4.8   |
| S82579 | histamine N-methyltransferase                                                      | 3.2   | 1.6   |
| S82627 | placentae and embryos oncofetal gene                                               | 27.4  | 9.2   |
| S82649 | Narp=neuronal activity-regulated pentraxin                                         | 43    | 21.6  |
| S82649 | Narp=neuronal activity-regulated pentraxin                                         | 19.3  | 10.6  |
| S82820 | glutathione-S-transferase, alpha type2                                             | 10.3  | 6.8   |
| S82911 | paired mesoderm homeobox 1                                                         | 23.6  | 9     |
| S83279 | peroxisomal multifunctional enzyme type II                                         | 19.2  | 11.5  |
| S83279 | peroxisomal multifunctional enzyme type II                                         | 16.2  | 17.3  |
| S83320 | r-HuD=HuD [rats, hypothalamus, mRNA, 1444 nt]                                      | 27.3  | 6.3   |
| S83320 | r-HuD=HuD [rats, hypothalamus, mRNA, 1444 nt]                                      | 10.2  | 10    |
| S83358 | Protein tyrosine kinase                                                            | 37    | 10.1  |
| S83436 | glutathione S-transferase, mitochondrial                                           | 37.5  | 24.5  |
| S87544 | Alpha-1 microglobulin/bikunin                                                      | 28.9  | 44.4  |
| S87544 | Alpha-1 microglobulin/bikunin                                                      | 6.1   | 5.1   |
| S90449 | Protein phosphatase type 1B (formely 2C), Mg-dependent, beta isoform               | 16.3  | 10.3  |
| S94371 | glutamate receptor, ionotropic, 4                                                  | 14.7  | 11.2  |
| S94371 | glutamate receptor, ionotropic, 4                                                  | 10    | 10.5  |
| S96418 | activin receptor                                                                   | 4.1   | 4     |
| S98336 | anti-mullerian hormone                                                             | 48.1  | 29    |
| U00475 | Opioid receptor delta 1                                                            | 3.8   | 1.9   |
| U00964 | common salivary protein 1                                                          | 16    | 15.5  |
| U01022 | Huntington disease gene homolog                                                    | 12.9  | 13.1  |

|        |                                                               |       |      |
|--------|---------------------------------------------------------------|-------|------|
| U01146 | nuclear receptor subfamily 4, group A, member 2               | 34    | 33.4 |
| U01245 | amelogenin                                                    | 2.7   | 2.3  |
| U01344 | N-acetyltransferase 1 (arylamine N-acetyltransferase)         | 18.6  | 12   |
| U01344 | N-acetyltransferase 1 (arylamine N-acetyltransferase)         | 9.4   | 6.4  |
| U01345 | N-acetyltransferase 1 (arylamine N-acetyltransferase)         | 4.1   | 2    |
| U01346 | arylamine N-acetyltransferase                                 | 16.1  | 11.8 |
| U01347 | arylamine N-acetyltransferase                                 | 170.2 | 34.7 |
| U01348 | N-Acetyltransferase-2                                         | 16.6  | 8.2  |
| U01348 | N-Acetyltransferase-2                                         | 2.2   | 1    |
| U01908 | angiotensin II receptor, type 2                               | 4.8   | 4.2  |
| U01914 | A kinase anchor protein 8                                     | 12.8  | 14.3 |
| U02074 | dentin sailophosphoprotein                                    | 8.8   | 5    |
| U02096 | fatty acid binding protein 7                                  | 23    | 15.5 |
| U02315 | neuregulin 1                                                  | 11.1  | 8.3  |
| U02315 | neuregulin 1                                                  | 8.1   | 10.8 |
| U02316 | neuregulin 1                                                  | 17.6  | 10.6 |
| U02318 | neuregulin 1                                                  | 4.7   | 4.4  |
| U02320 | neuregulin 1                                                  | 4.2   | 6.2  |
| U02322 | neuregulin 1                                                  | 22.3  | 24.7 |
| U02506 | Polymeric immunoglobulin receptor                             | 131.5 | 55.1 |
| U02522 | metastasis associated 1                                       | 5.2   | 1.6  |
| U02553 | protein tyrosine phosphatase, non-receptor type 16            | 7.9   | 8.2  |
| U02983 | secretogranin III                                             | 12.3  | 11.5 |
| U03388 | prostaglandin-endoperoxide synthase 1                         | 56.5  | 25.9 |
| U03414 | olfactomedin related ER localized protein                     | 34.9  | 9.4  |
| U03416 | olfactomedin related ER localized protein                     | 2.5   | 0.8  |
| U03470 | tumor necrosis factor (ligand) superfamily, member 6          | 9.3   | 10.6 |
| U03491 | transforming growth factor, beta 3                            | 50.5  | 14.4 |
| U03491 | transforming growth factor, beta 3                            | 12.7  | 6.9  |
| U03629 | guanine deaminase                                             | 21.5  | 16.9 |
| U03699 | nitric oxide synthase 2                                       | 23.6  | 18.7 |
| U03734 | angiotensin 1 converting enzyme 1                             | 61.9  | 35.3 |
| U03763 | phospholipase A2, group 5                                     | 17.2  | 10.2 |
| U03763 | phospholipase A2, group 5                                     | 16.6  | 11.9 |
| U03763 | phospholipase A2, group 5                                     | 14.5  | 7.8  |
| U04317 | interleukin 1 receptor-like 1                                 | 22.6  | 14.9 |
| U04319 | interleukin 1 receptor-like 1                                 | 5.1   | 1.5  |
| U04540 | Spinacea oleracea flavocytochrome b5 chimeric protein         | 4.6   | 4.5  |
| U04733 | arachidonic acid epoxigenase                                  | 48.8  | 31.7 |
| U04738 | somatostatin receptor 4                                       | 38.9  | 16.7 |
| U04808 | Rbs11 protein                                                 | 23.6  | 13.8 |
| U04835 | cAMP responsive element modulator                             | 24.3  | 22.2 |
| U04842 | epidermal growth factor                                       | 10.8  | 3.6  |
| U04860 | Aryl hydrocarbon receptor                                     | 2.9   | 1.1  |
| U04934 | solute carrier family 8, member 1                             | 20.9  | 12.5 |
| U04937 | solute carrier family 8, member 1                             | 14.7  | 7.1  |
| U04998 | protein tyrosine phosphatase, receptor-type, Z polypeptide 1  | 10.2  | 4.6  |
| U05013 | heme oxygenase 2                                              | 42.3  | 13.5 |
| U05014 | eukaryotic translation initiation factor 4E binding protein 1 | 28.3  | 18   |
| U05014 | eukaryotic translation initiation factor 4E binding protein 1 | 21.8  | 8.8  |
| U05675 | Fibrinogen, B beta polypeptide                                | 13.4  | 6.7  |
| U05989 | PRKC, apoptosis, WT1, regulator                               | 22.3  | 15   |
| U06230 | protein S                                                     | 37.9  | 15.9 |
| U06273 | UDP-glucuronosyltransferase                                   | 1.1   | 0.2  |
| U06274 | UDP-glucuronosyltransferase                                   | 4.9   | 7.6  |
| U06713 | EGL nine homolog 3 (C. elegans)                               | 62.5  | 17.6 |
| U07177 | lactate dehydrogenase 3, C chain                              | 2.3   | 1.2  |
| U07181 | lactate dehydrogenase B                                       | 21.2  | 14.1 |
| U07181 | lactate dehydrogenase B                                       | 6.5   | 3.7  |
| U07183 | solute carrier family 10, member 2                            | 5.2   | 5    |
| U07201 | Asparagine synthetase                                         | 9.6   | 9.2  |
| U07560 | Ephrin B1                                                     | 1.9   | 1    |
| U07610 | Sp4 transcription factor                                      | 9.7   | 10   |
| U07615 | mucin                                                         | 15.8  | 8.4  |
| U07619 | coagulation factor 3                                          | 12.7  | 4.5  |
| U07798 | phospholipase A2, group 2C                                    | 6.4   | 3.1  |
| U07798 | phospholipase A2, group 2C                                    | 2.2   | 0.6  |
| U08141 | solute carrier family 8 (sodium/calcium exchanger), member 2  | 35.1  | 32.6 |
| U08214 | DNA binding protein (URE-B1)                                  | 7.1   | 2    |
| U08255 | glutamate receptor, ionotropic, delta 1                       | 12.5  | 12.9 |
| U08256 | glutamate receptor, ionotropic, delta 2                       | 5.7   | 6.9  |
| U08257 | Glutamate receptor, ionotropic, kainate 4                     | 6.9   | 4.5  |
| U08259 | glutamate receptor, ionotropic, NMDA2C                        | 13.4  | 8    |
| U08260 | glutamate receptor, ionotropic, NMDA2D                        | 17.3  | 7.5  |
| U08290 | neuronatin                                                    | 25.7  | 9.6  |
| U08344 | ATPase, Cu++ transporting, beta polypeptide                   | 7.5   | 11.9 |
| U08976 | enoyl coenzyme A hydratase 1                                  | 21.1  | 19.4 |
| U08986 | aryl hydrocarbon receptor nuclear translocator                | 12.9  | 12.3 |
| U09022 | testis lipid binding protein                                  | 4     | 3.4  |



|        |                                                                            |      |      |
|--------|----------------------------------------------------------------------------|------|------|
| U09229 | cut (Drosophila)-like 1                                                    | 24.3 | 14.9 |
| U09243 | Potassium inwardly-rectifying channel, subfamily J, member 3               | 12.9 | 11.1 |
| U09307 | protein tyrosine phosphatase, non-receptor type 11                         | 7.6  | 4.8  |
| U09357 | protein tyrosine phosphatase, receptor-type, Z polypeptide 1               | 3.6  | 1.9  |
| U09361 | tenascin C                                                                 | 65.8 | 41.2 |
| U09401 | tenascin C                                                                 | 2.8  | 1.6  |
| U09407 | protein kinase C, iota                                                     | 11.9 | 9.9  |
| U09540 | cytochrome P450, subfamily 1B, polypeptide 1                               | 15.7 | 9.3  |
| U09540 | cytochrome P450, subfamily 1B, polypeptide 1                               | 12.2 | 10.2 |
| U09631 | vasopressive intestinal peptide receptor 2                                 | 4    | 2.7  |
| U09793 | Kirsten rat sarcoma viral oncogene homologue 2 (active)                    | 7.4  | 6.9  |
| U09815 | Carcinoembryonic antigen gene family (CGM3)                                | 23.4 | 13.3 |
| U09957 | solute carrier family 14, member 2                                         | 7.5  | 4.2  |
| U10071 | cocaine and amphetamine regulated transcript                               | 30.8 | 17.2 |
| U10096 | solute carrier family 12, member 1                                         | 6.3  | 3.7  |
| U10097 | solute carrier family 12, member 3                                         | 24.1 | 12.1 |
| U10188 | polo-like kinase homolog (Drosophila)                                      | 86.5 | 15.7 |
| U10279 | solute carrier family 28 (sodium-coupled nucleoside transporter), member 1 | 46.4 | 13   |
| U10303 | endothelial differentiation sphingolipid G-protein-coupled receptor 1      | 18.3 | 12.2 |
| U10354 | calcium-sensing receptor                                                   | 8    | 5    |
| U10357 | pyruvate dehydrogenase kinase 2                                            | 23   | 7.7  |
| U10357 | pyruvate dehydrogenase kinase 2                                            | 8    | 5.2  |
| U10697 | carboxylesterase 1                                                         | 3.4  | 2.3  |
| U10699 | endothelial differentiation, sphingolipid G-protein-coupled receptor, 5    | 11.5 | 12.5 |
| U10925 | CD80 antigen                                                               | 9.8  | 5.8  |
| U10995 | nuclear receptor subfamily 2, group F, member 1                            | 14.9 | 7.9  |
| U10995 | nuclear receptor subfamily 2, group F, member 1                            | 14.3 | 7.6  |
| U11031 | contactin 3                                                                | 4    | 3.6  |
| U11071 | polyadenylate-binding protein-related protein                              | 13.4 | 19.1 |
| U11275 | WKY and SHRSP phenylethanolamine N-methyltransferase (PNMT)                | 17.1 | 8.2  |
| U11418 | glutamate receptor, ionotropic, N-methyl D-aspartate 1                     | 10   | 5.4  |
| U11419 | glutamate receptor, ionotropic, NMDA2B                                     | 12   | 6.9  |
| U11681 | FK506 binding protein 12-rapamycin associated protein 1                    | 12.8 | 13.5 |
| U12184 | G-protein coupled receptor 12                                              | 18.6 | 10.9 |
| U12187 | Ras-related associated with diabetes                                       | 4.9  | 4.9  |
| U12268 | carbonic anhydrase 5                                                       | 28.3 | 17.2 |
| U12336 | acetylcholine receptor alpha 9 subunit (nAChR)                             | 14.6 | 12.1 |
| U12402 | ADP-ribosylation factor-like 1                                             | 15.4 | 12.7 |
| U12428 | Early growth response 3                                                    | 17.8 | 18.2 |
| U12514 | transcriptional regulator MSX-2 (MSX-2) partially processed mRNA           | 58.1 | 43.9 |
| U12568 | ADP-ribosylation-like 3                                                    | 6.1  | 6.7  |
| U12571 | rabphilin 3A                                                               | 13.3 | 9.1  |
| U12623 | Cyclic nucleotide gated cation channel                                     | 2.9  | 2.5  |
| U12973 | X transporter protein 2                                                    | 7.6  | 2.3  |
| U13176 | ubiquitin-conjugating enzyme E2D 2                                         | 23.2 | 18.6 |
| U13177 | ubiquitin-conjugating enzyme E2D 3 (homologous to yeast UBC4/5)            | 24.5 | 12.6 |
| U13368 | adrenergic receptor, alpha 1a                                              | 6.9  | 3.8  |
| U13396 | Janus kinase 2 (a protein tyrosine kinase)                                 | 18.2 | 10   |
| U13396 | Janus kinase 2 (a protein tyrosine kinase)                                 | 2.1  | 0.8  |
| U14005 | calcium channel alpha-1 subunit                                            | 32.8 | 19.1 |
| U14007 | aquaporin 4                                                                | 14.2 | 8.3  |
| U14010 | Interleukin 1 receptor, type I                                             | 14   | 14.4 |
| U14010 | Interleukin 1 receptor, type I                                             | 1.3  | 0.4  |
| U14192 | vesicle docking protein, 115 kDa                                           | 19.1 | 11.3 |
| U14398 | synaptotagmin 4                                                            | 6.7  | 4.4  |
| U14398 | synaptotagmin 4                                                            | 4.2  | 1.6  |
| U14409 | melatonin receptor 1A                                                      | 10.4 | 6.9  |
| U14414 | purinergic receptor P2X, ligand-gated ion channel, 2                       | 18.6 | 15.3 |
| U14533 | nuclear receptor subfamily 1, group H, member 2                            | 85.3 | 35.8 |
| U14647 | caspase 1                                                                  | 16.2 | 12.2 |
| U14950 | discs, large homolog 1 (Drosophila)                                        | 6.1  | 2.5  |
| U15098 | solute carrier family 1, member 2                                          | 19.8 | 22.5 |
| U15149 | lens epithelial protein                                                    | 25   | 17.9 |
| U15176 | ATPase, Na+/K+ transporting, alpha 4 polypeptide                           | 8.9  | 8.9  |
| U15211 | Retinoic acid receptor, alpha                                              | 36.9 | 18   |
| U15280 | caveolin 3                                                                 | 7.3  | 2.8  |
| U15408 | ATPase, Ca++ transporting, plasma membrane 4                               | 38.9 | 20.7 |
| U15425 | membrane and microfilament-associated protein p58                          | 19.6 | 13.4 |
| U15550 | tenascin C                                                                 | 7.2  | 8.4  |
| U15734 | reticulocalbin 2                                                           | 14.9 | 6.5  |
| U15764 | myosin, heavy polypeptide 9                                                | 77.9 | 22.1 |
| U15766 | myosin heavy chain 10, non-muscle                                          | 4.1  | 1.4  |
| U16025 | RT1 class Ib gene, locus M3                                                | 5.4  | 1.1  |
| U16245 | aquaporin 5                                                                | 9.7  | 6.8  |
| U16245 | aquaporin 5                                                                | 9.6  | 6.4  |
| U16359 | nitric oxide synthase                                                      | 6.6  | 3.6  |
| U16655 | phospholipase C, delta 4                                                   | 4.8  | 3.8  |
| U16674 | interleukin 12b                                                            | 15.1 | 12   |
| U16686 | defensin NP-2 precursor                                                    | 4.1  | 2.5  |

|        |                                                                                                |       |      |
|--------|------------------------------------------------------------------------------------------------|-------|------|
| U16802 | Ca2+-dependent activator protein                                                               | 15.1  | 16.2 |
| U16845 | neurotrimin                                                                                    | 30.2  | 16.3 |
| U16858 | testin                                                                                         | 3.2   | 1.4  |
| U17013 | POU domain, class 2, transcription factor 1                                                    | 6.6   | 7.3  |
| U17133 | solute carrier family 30, member 1                                                             | 13.2  | 18.9 |
| U17253 | Ngfi-A binding protein 1                                                                       | 13.5  | 8.9  |
| U17254 | immediate early gene transcription factor NGFI-B                                               | 35    | 29.1 |
| U17254 | immediate early gene transcription factor NGFI-B                                               | 18.9  | 15.9 |
| U17260 | N-acetyltransferase 1 (arylamine N-acetyltransferase)                                          | 15.9  | 17.3 |
| U17261 | N-Acetyltransferase-2                                                                          | 14.6  | 14.9 |
| U17565 | mini chromosome maintenance deficient 6 (S. cerevisiae)                                        | 35.7  | 5    |
| U17565 | mini chromosome maintenance deficient 6 (S. cerevisiae)                                        | 10    | 5.2  |
| U17604 | reticulon 1                                                                                    | 9.8   | 11.1 |
| U17607 | nuclear transcription factor-Y gamma                                                           | 16.1  | 9.6  |
| U17697 | cytochrome P450, subfamily 51                                                                  | 19.3  | 10.3 |
| U17834 | biglycan                                                                                       | 37.1  | 16.3 |
| U17837 | zinc finger protein RIZ                                                                        | 68.8  | 21.6 |
| U17837 | zinc finger protein RIZ                                                                        | 20.2  | 10.5 |
| U17837 | zinc finger protein RIZ                                                                        | 8.3   | 8.8  |
| U17901 | phospholipase A2, activating protein                                                           | 11.6  | 9.9  |
| U17971 | protein tyrosine phosphatase 2E                                                                | 26.7  | 10.7 |
| U18314 | thymopoietin                                                                                   | 27.1  | 15.1 |
| U18314 | thymopoietin                                                                                   | 12.4  | 8.5  |
| U18374 | nuclear receptor subfamily 1, group H, member 4                                                | 16.2  | 13.6 |
| U18419 | Caldesmon 1                                                                                    | 9.4   | 8.9  |
| U18530 | ---                                                                                            | 3.6   | 4.8  |
| U18650 | Huntington disease gene homolog                                                                | 9.1   | 4    |
| U18762 | retinol dehydrogenase type III                                                                 | 2.4   | 0.5  |
| U18771 | RAB26, member RAS oncogene family                                                              | 18.6  | 12.8 |
| U18942 | adenosine deaminase, RNA-specific                                                              | 5.8   | 1.1  |
| U18982 | Fos like antigen 2                                                                             | 21.5  | 12.4 |
| U19485 | spp-24 precursor                                                                               | 28.5  | 20.2 |
| U19485 | spp-24 precursor                                                                               | 16.1  | 11.8 |
| U19516 | initiation factor eIF-2Be                                                                      | 4.5   | 2.5  |
| U19614 | lamina-associated polypeptide 1C                                                               | 110.9 | 63.9 |
| U19866 | activity regulated cytoskeletal-associated protein                                             | 40.7  | 9.8  |
| U19893 | actinin alpha 4                                                                                | 42.6  | 32.3 |
| U20105 | synaptotagmin 6                                                                                | 21.8  | 10.6 |
| U20106 | synaptotagmin 7                                                                                | 18.3  | 10.5 |
| U20108 | synaptogamin V                                                                                 | 14.2  | 8.5  |
| U20110 | synaptotagmin 8                                                                                | 15.9  | 14.1 |
| U20121 | Rattus norvegicus type XI collagen alpha-1 chain (COL11A1) mRNA, partial cds                   | 2.1   | 1.1  |
| U20181 | iron-regulatory protein 2                                                                      | 24.9  | 14.2 |
| U20194 | complement C8 beta                                                                             | 21.7  | 9.8  |
| U20194 | complement C8 beta                                                                             | 8.7   | 4.5  |
| U20195 | Phosphoglucosmutase 1                                                                          | 10.1  | 5.6  |
| U20283 | syntaxin binding protein Munc18-2                                                              | 7.8   | 12.9 |
| U20796 | nuclear receptor subfamily 1, group D, member 2                                                | 15.5  | 12.9 |
| U20907 | 5-hydroxytryptamine (serotonin) receptor 4                                                     | 18.5  | 6.2  |
| U21087 | Potassium inwardly-rectifying, channel, subfamily J, member 6                                  | 8.8   | 9.3  |
| U21101 | cyclic GMP stimulated phosphodiesterase                                                        | 5     | 2.7  |
| U21662 | mannosyl (alpha-1,6-)-glycoprotein beta-1,2-N-acetylglucosaminyltransferase                    | 9.4   | 11.3 |
| U21683 | Spleen tyrosine kinase                                                                         | 30.7  | 10.7 |
| U21720 | Rattus norvegicus clone C201 intestinal epithelium proliferating cell-associated mRNA sequence | 30    | 17.4 |
| U21721 | clone C101 intestinal epithelium proliferating cell-associated                                 | 27.6  | 9.5  |
| U21954 | Eph receptor A7                                                                                | 6.9   | 4.8  |
| U22296 | casein kinase 1 gamma 1                                                                        | 9     | 7.1  |
| U22321 | casein kinase 1 gamma 3 isoform                                                                | 12.9  | 10   |
| U22424 | hydroxysteroid 11-beta dehydrogenase 2                                                         | 2.1   | 0.5  |
| U22830 | purinergic receptor P2Y, G-protein coupled 1                                                   | 7     | 4.1  |
| U22952 | neuroligin 1                                                                                   | 21.9  | 10.6 |
| U23055 | C-CAM4 protein                                                                                 | 78.7  | 43.4 |
| U23146 | mitogenic regulation SSeCKS (322)                                                              | 8     | 3    |
| U23407 | cellular retinoic acid binding protein 2                                                       | 4.7   | 2.6  |
| U23438 | MAP kinase phosphatase                                                                         | 10.7  | 1.5  |
| U23769 | PDZ and LIM domain 1                                                                           | 28.7  | 11.2 |
| U24070 | Munc13-1                                                                                       | 7.7   | 6.1  |
| U24071 | Munc13-2 protein                                                                               | 2.6   | 0.6  |
| U24150 | Tuberous sclerosis 2, (renal carcinoma)                                                        | 46.9  | 12.8 |
| U24174 | cyclin-dependent kinase inhibitor 1A                                                           | 72.5  | 48.8 |
| U24175 | Signal transducer and activator of transcription 5a                                            | 23.2  | 10.1 |
| U24282 | deiodinase, iodothyronine, type III                                                            | 10.2  | 11.5 |
| U24489 | Tenascin X                                                                                     | 6.7   | 5.6  |
| U24652 | linker of T-cell receptor pathways                                                             | 27.3  | 7.8  |
| U25137 | alternatively spliced signal transducer and regulator of transcription 5a2 (STAT5a2)           | 26.1  | 18.2 |
| U25148 | brush border myosin-I (BBMI)                                                                   | 4.9   | 3.1  |
| U25281 | SH3 domain binding protein CR16                                                                | 10.2  | 5    |
| U25282 | brush border myosin-I (BBMI)                                                                   | 16.2  | 12.4 |
| U25650 | nerve growth factor receptor                                                                   | 236   | 128  |

|        |                                                                     |       |      |
|--------|---------------------------------------------------------------------|-------|------|
| U25651 | phosphofructokinase, muscle                                         | 39.5  | 10.7 |
| U25746 | RNA helicase                                                        | 19    | 12.5 |
| U25746 | RNA helicase                                                        | 6.3   | 6.8  |
| U25802 | luteinizing hormone beta                                            | 12.5  | 7.5  |
| U25802 | luteinizing hormone beta                                            | 11.7  | 6.8  |
| U25803 | luteinizing hormone beta                                            | 2.2   | 0.5  |
| U25808 | Kidney androgen-regulated protein                                   | 3.5   | 1.3  |
| U25967 | aristaless (Drosophila) homeobox                                    | 8.4   | 4.7  |
| U26033 | carnitine O-octanoyltransferase                                     | 15.3  | 11.7 |
| U26310 | tensin                                                              | 75.4  | 58.9 |
| U26356 | S100A1 gene,                                                        | 106.8 | 73   |
| U26397 | inositol polyphosphate-4-phosphatase, type 1                        | 5.3   | 2.7  |
| U26402 | synaptotagmin 5                                                     | 39.3  | 42.9 |
| U26541 | kinase substrate HASPP28                                            | 76.3  | 37.6 |
| U26595 | prostaglandin F2 receptor negative regulator                        | 35    | 11.6 |
| U26663 | Prostaglandin F receptor                                            | 2.8   | 0.7  |
| U27186 | zinc finger protein 111                                             | 17.7  | 13   |
| U27319 | type I hexokinase (HKI) gene                                        | 22.5  | 14.3 |
| U27322 | arginine vasopressin receptor 1B                                    | 16.3  | 14.5 |
| U27518 | UDP-glucuronosyltransferase                                         | 24.6  | 12.7 |
| U27558 | potassium inwardly-rectifying channel, subfamily J, member 10       | 12    | 7.9  |
| U27562 | SPARC-like 1                                                        | 5.5   | 0.9  |
| U27767 | regulator of G-protein signaling 4                                  | 7.6   | 6.8  |
| U28356 | protein-tyrosine phosphatase, non-receptor type 7                   | 29.5  | 13.4 |
| U28504 | solute carrier family 17 vesicular glutamate transporter), member 1 | 4.6   | 1.6  |
| U28504 | solute carrier family 17 vesicular glutamate transporter), member 1 | 2.1   | 0.8  |
| U28927 | GABA transporter                                                    | 34.3  | 17.6 |
| U28975 | glycine transporter (GLYT-1)                                        | 31.4  | 23.2 |
| U28975 | glycine transporter 1                                               | 8.9   | 6.1  |
| U29174 | paired-like homeodomain transcription factor Drg11                  | 20.7  | 20.7 |
| U29339 | avian erythroblastosis oncogene B 3                                 | 20.8  | 12.5 |
| U29873 | glutamate receptor, ionotropic, N-methyl-D-aspartate 3A             | 20.1  | 17.2 |
| U29881 | low affinity Na-dependent glucose transporter (SGLT2)               | 5.4   | 2.4  |
| U30186 | DNA-damage inducible transcript 3                                   | 8.2   | 4.7  |
| U30290 | galanin receptor 1                                                  | 11.5  | 12.9 |
| U30381 | zinc finger protein 148                                             | 23.6  | 14.8 |
| U30485 | aspartyl-tRNA synthetase                                            | 171.1 | 56   |
| U30788 | Rattus norvegicus Tclone4 mRNA                                      | 43.1  | 10.3 |
| U30788 | Rattus norvegicus Tclone4 mRNA                                      | 7.7   | 5.6  |
| U30813 | aspartyl-tRNA synthetase (Psi-DRS1) pseudogene                      | 5.8   | 5    |
| U30831 | B/K protein                                                         | 14.5  | 12.5 |
| U30938 | microtubule-associated protein 2                                    | 5.7   | 4.4  |
| U31159 | SH3 domain binding protein CR16                                     | 26.7  | 19.3 |
| U31160 | SH3 domain binding protein CR16                                     | 30.7  | 15.3 |
| U31203 | Noggin                                                              | 27.3  | 13.9 |
| U31352 | 2,3-oxidosqualene: lanosterol cyclase                               | 13.9  | 5    |
| U31367 | myelin and lymphocyte protein                                       | 23.9  | 14.1 |
| U31463 | myosin, heavy polypeptide 9                                         | 30.6  | 13.2 |
| U31554 | limbic system-associated membrane protein                           | 4.2   | 0.8  |
| U31599 | R.norvegicus mRNA for RT1.Mb                                        | 21.2  | 26.8 |
| U31668 | E2F transcription factor 5                                          | 14.7  | 12   |
| U31772 | calcium channel, voltage-dependent, L type, alpha 1D subunit        | 5.9   | 6.5  |
| U31777 | dentatorubral pallidoluysian atrophy                                | 16.1  | 8.8  |
| U31777 | dentatorubral pallidoluysian atrophy                                | 5.7   | 3    |
| U31815 | calcium channel, voltage-dependent, alpha 1C subunit                | 13.7  | 7.7  |
| U31816 | calcium channel, voltage-dependent, L type, alpha 1S subunit        | 3.8   | 2.6  |
| U31866 | Rattus norvegicus Nclone10 mRNA                                     | 44.4  | 18.1 |
| U31866 | Rattus norvegicus Nclone10 mRNA                                     | 30.9  | 13.3 |
| U31880 | eukaryotic translation initiation factor 2B, subunit 2 (beta, 39kD) | 119.1 | 20.8 |
| U32314 | Pyruvate carboxylase                                                | 10.5  | 4.9  |
| U32314 | Pyruvate carboxylase                                                | 8.6   | 5    |
| U32372 | tyrosine-ester sulfotransferase                                     | 10.2  | 7.2  |
| U32498 | secretory protein SEC8                                              | 4.4   | 5.1  |
| U32575 | RSec6 protein                                                       | 10.5  | 8.5  |
| U32577 | heterogeneous nuclear ribonucleoprotein M                           | 6.5   | 4.6  |
| U32681 | deleted in malignant brain tumors 1                                 | 31.4  | 18.6 |
| U33287 | calsequestrin 2                                                     | 25.7  | 11.5 |
| U33441 | submandibular gland mucin                                           | 3.5   | 1.6  |
| U33471 | balloon angioplasty responsive transcript                           | 29.9  | 27.5 |
| U33500 | Rattus norvegicus retinol dehydrogenase type II mRNA, complete cds  | 23    | 18   |
| U33500 | Rattus norvegicus retinol dehydrogenase type II mRNA, complete cds  | 5.9   | 1.7  |
| U33540 | cytochrome P450                                                     | 12.3  | 6.3  |
| U33541 | cytochrome P450                                                     | 61.1  | 29   |
| U33553 | chondroitin sulfate proteoglycan 5                                  | 51.7  | 27.6 |
| U33847 | guanylyl cyclase with kinase-like domain, soluble                   | 20.8  | 7    |
| U33935 | urocortin                                                           | 14    | 13.3 |
| U34684 | caspase 2                                                           | 9.7   | 9.4  |
| U34843 | D123 gene product                                                   | 16    | 9.7  |
| U34843 | D123 gene product                                                   | 16    | 14   |

|        |                                                                                                    |       |      |
|--------|----------------------------------------------------------------------------------------------------|-------|------|
| U34897 | prolactin receptor                                                                                 | 32.6  | 22.3 |
| U34932 | Fos-related antigen                                                                                | 13.8  | 12.1 |
| U34963 | Bcl2-like 1                                                                                        | 33.5  | 16.1 |
| U34985 | muscle, skeletal, receptor tyrosine kinase                                                         | 7.2   | 6.8  |
| U35099 | complexin 2                                                                                        | 16.7  | 10.5 |
| U35244 | vacuolar protein sorting homolog r-vps33a                                                          | 13.3  | 4.7  |
| U35245 | vacuolar protein sorting homolog r-vps33b                                                          | 19.3  | 11.1 |
| U35245 | vacuolar protein sorting homolog r-vps33b                                                          | 17.6  | 19.3 |
| U35315 | 5-hydroxytryptamine (serotonin) receptor 2C                                                        | 2.9   | 2.2  |
| U35345 | p21 (CDKN1A)-activated kinase 2                                                                    | 22.2  | 10.5 |
| U35371 | axonal-associated cell adhesion molecule                                                           | 8.3   | 3.9  |
| U35774 | branched chain aminotransferase 1, cytosolic                                                       | 31.7  | 11   |
| U35775 | adducin 3, gamma                                                                                   | 15.9  | 7    |
| U35775 | adducin 3, gamma                                                                                   | 1.8   | 0.9  |
| U35776 | ADP-ribosylation factor 1 GTPase activating protein                                                | 22.1  | 8.6  |
| U35890 | polypeptide GalNAc transferase T1                                                                  | 18    | 15.1 |
| U36444 | PCTAIRE-1 protein kinase, alternatively spliced                                                    | 23.9  | 11.1 |
| U36444 | PCTAIRE-1 protein kinase, alternatively spliced                                                    | 16.9  | 15   |
| U36444 | PCTAIRE-1 protein kinase, alternatively spliced                                                    | 23.7  | 16.5 |
| U36482 | endoplasmic reticulum protein 29                                                                   | 55.3  | 23.3 |
| U36580 | proprotein convertase subtilisin / kexin, type 7                                                   | 28    | 6.4  |
| U36771 | glycerol-3-phosphate acyltransferase, mitochondrial                                                | 11.2  | 11.3 |
| U36771 | glycerol-3-phosphate acyltransferase, mitochondrial                                                | 5.8   | 6    |
| U36772 | glycerol-3-phosphate acyltransferase, mitochondrial                                                | 9.2   | 9.4  |
| U36773 | glycerol-3-phosphate acyltransferase, mitochondrial                                                | 7.1   | 1.5  |
| U36773 | glycerol-3-phosphate acyltransferase, mitochondrial                                                | 6.1   | 4    |
| U36785 | putative pheromone receptor VN1                                                                    | 3.3   | 4.1  |
| U36786 | putative pheromone receptor VN7                                                                    | 4.7   | 3.9  |
| U36895 | putative pheromone receptor VN3                                                                    | 13.7  | 7.5  |
| U36896 | vomeroneasal 1 receptor, B6                                                                        | 7.9   | 2.8  |
| U36897 | putative pheromone receptor VN5                                                                    | 3.7   | 1.5  |
| U36898 | putative pheromone receptor VN6                                                                    | 25.3  | 6.5  |
| U36899 | putative pheromone receptor VN2                                                                    | 3.7   | 3.1  |
| U36992 | cytochrome P450, subfamily 7B, polypeptide 1                                                       | 14    | 9.3  |
| U37058 | Neuromedin B receptor                                                                              | 29.8  | 27.4 |
| U37099 | RAB3C, member RAS oncogene family                                                                  | 17.8  | 12.7 |
| U37101 | colony stimulating factor 3                                                                        | 23.7  | 15.9 |
| U37121 | CD152 antigen                                                                                      | 27.3  | 24   |
| U37138 | steroid sulfatase                                                                                  | 51.4  | 21.2 |
| U37142 | Brevican                                                                                           | 14.6  | 9.8  |
| U37147 | Sodium channel beta 2                                                                              | 5.4   | 7.3  |
| U37462 | mitogen activated protein kinase kinase 5                                                          | 10.1  | 11.7 |
| U38179 | phosphodiesterase 3A                                                                               | 16    | 10.4 |
| U38180 | solute carrier family 19, member 1                                                                 | 72.6  | 30.4 |
| U38180 | solute carrier family 19, member 1                                                                 | 8     | 3.4  |
| U38253 | eukaryotic translation initiation factor 2B, subunit 3 (gamma, 58kD)                               | 17    | 9    |
| U38253 | eukaryotic translation initiation factor 2B, subunit 3 (gamma, 58kD)                               | 10    | 9.1  |
| U38306 | arylalkylamine N - acetyltransferase                                                               | 12.3  | 2    |
| U38373 | huntingtin-associated protein 1                                                                    | 1.5   | 1.3  |
| U38379 | gamma-glutamyl hydrolase                                                                           | 9.2   | 9.8  |
| U38481 | RhoA - binding serine/threonine kinase alpha (ROK - alpha)                                         | 9.7   | 8.2  |
| U38653 | inositol 1,4,5-triphosphate receptor 1                                                             | 25.6  | 11.8 |
| U38801 | DNA polymerase beta                                                                                | 3.9   | 1.5  |
| U38812 | inositol 1,4,5-triphosphate receptor 1                                                             | 1.7   | 0.4  |
| U38938 | RATF2                                                                                              | 5.9   | 6.1  |
| U39044 | dynein, cytoplasmic, intermediate polypeptide 2                                                    | 12.9  | 9.5  |
| U39206 | cytochrome P450 4F4                                                                                | 19    | 15.4 |
| U39207 | cytochrome P450 4F5                                                                                | 4.5   | 2.8  |
| U39320 | cysteine string protein                                                                            | 17.5  | 11.4 |
| U39549 | synaptogyrin 1                                                                                     | 138.6 | 86.2 |
| U39549 | synaptogyrin 1                                                                                     | 5.8   | 2.7  |
| U39571 | phosphatidylinositol 4-kinase                                                                      | 2.8   | 4.3  |
| U39572 | phosphatidylinositol 4-kinase                                                                      | 28.2  | 13.1 |
| U39608 | anti-NGF30 antibody heavy-chain                                                                    | 8.3   | 6.4  |
| U39609 | Rattus norvegicus anti-NGF30 antibody light-chain mRNA, variable and constant regions, partial cds | 6.6   | 9.5  |
| U39609 | Rattus norvegicus anti-NGF30 antibody light-chain mRNA, variable and constant regions, partial cds | 3.4   | 5.5  |
| U39875 | calcium binding protein P22                                                                        | 35    | 27.2 |
| U39943 | cytochrome P450 monooxygenase                                                                      | 9.9   | 7.4  |
| U40000 | cytochrome P450 monooxygenase                                                                      | 2.5   | 2.1  |
| U40001 | lipase, hormone sensitive                                                                          | 50    | 51.7 |
| U40004 | cytochrome P450 monooxygenase                                                                      | 6.8   | 5.3  |
| U40064 | peroxisome proliferator activated receptor delta                                                   | 129   | 99.5 |
| U40064 | peroxisome proliferator activated receptor delta                                                   | 37.6  | 25.2 |
| U40188 | TAF9-like RNA polymerase II, TATA box binding protein (TBP)-associated factor, 31 kD               | 19.1  | 10.1 |
| U40603 | potassium large conductance calcium-activated channel, subfamily M, alpha member 1                 | 5.5   | 6.5  |
| U40628 | unknown Glu-Pro dipeptide repeat protein                                                           | 10.2  | 6.1  |
| U40790 | Protein tyrosine phosphatase, receptor type, J                                                     | 30.3  | 22.9 |
| U40819 | protein kinase, AMP-activated, alpha 1 catalytic subunit                                           | 7.4   | 8.2  |
| U40836 | Cytochrom c oxidase subunit VIII-H (heart/muscle)                                                  | 14.1  | 12.2 |

|        |                                                                                                                                                              |       |      |
|--------|--------------------------------------------------------------------------------------------------------------------------------------------------------------|-------|------|
| U40999 | UNC-119 homolog (C. elegans)                                                                                                                                 | 34.5  | 28.7 |
| U41183 | growth hormone releasing hormone                                                                                                                             | 20.2  | 7.4  |
| U41183 | growth hormone releasing hormone                                                                                                                             | 10.8  | 13.4 |
| U41453 | A kinase (PRKA) anchor protein (gravin) 12                                                                                                                   | 7.3   | 4.8  |
| U41662 | neuroligin 2                                                                                                                                                 | 4.6   | 2.3  |
| U41663 | neuroligin 3                                                                                                                                                 | 7.4   | 4.1  |
| U41845 | nuclear pore associated protein                                                                                                                              | 6.2   | 4.1  |
| U41853 | oxygen regulated protein (150kD)                                                                                                                             | 36.9  | 11   |
| U42209 | sec22 homolog                                                                                                                                                | 12    | 5    |
| U42388 | pancreatic polypeptide receptor 1                                                                                                                            | 11.1  | 3    |
| U42413 | protein kinase, AMP-activated, gamma 1 non-catalytic subunit                                                                                                 | 48    | 26.9 |
| U42427 | anti-Mullerian hormone type 2 receptor                                                                                                                       | 8.8   | 7.7  |
| U42719 | complement component 4a                                                                                                                                      | 12.2  | 5.6  |
| U42755 | blocked early in transport 1 homolog (S. cerevisiae)                                                                                                         | 5.7   | 5.8  |
| U42975 | potassium voltage gated channel, Shal-related family, member 3                                                                                               | 21    | 13   |
| U43534 | adenosine deaminase, RNA-specific, B1                                                                                                                        | 6.9   | 5    |
| U44091 | arginine-glutamic acid dipeptide (RE) repeats                                                                                                                | 23.2  | 5.3  |
| U44129 | lectin, mannose-binding, 1                                                                                                                                   | 9.6   | 6.5  |
| U44750 | NAD-dependent 15-hydroxyprostaglandin dehydrogenase                                                                                                          | 5.5   | 6.7  |
| U44845 | vitronectin                                                                                                                                                  | 8     | 3.4  |
| U44946 | mucin 5, subtypes A and C                                                                                                                                    | 9.5   | 1.8  |
| U44948 | cysteine rich protein 2                                                                                                                                      | 9.1   | 6.6  |
| U44979 | inesin-related protein 2 (KRP2)                                                                                                                              | 9.1   | 7    |
| U45479 | synaptojanin 1                                                                                                                                               | 29.9  | 20.8 |
| U45986 | Max dimerization protein 3                                                                                                                                   | 17.8  | 12.6 |
| U46034 | Matrix metalloproteinase 11 (stromelysin 3)                                                                                                                  | 48.8  | 28   |
| U46118 | cytochrome P450 3A9                                                                                                                                          | 4.1   | 2.8  |
| U46958 | hyaluronan-binding protein CD44i                                                                                                                             | 13.3  | 7.6  |
| U47014 | proprotein convertase subtilisin/kexin type 5                                                                                                                | 18    | 9.8  |
| U47110 | calcium/calmodulin-dependent serine protein kinase                                                                                                           | 12.4  | 9.6  |
| U47311 | R2 cerebellum DDRT-T-PCR Rattus norvegicus cDNA clone LIARCD-2, mRNA sequence [Rattus norvegicus]                                                            | 4.1   | 1.9  |
| U47312 | Transcribed sequence with moderate similarity to protein prf:2019405A (R.norvegicus) 2019405A upstream regulator element-binding protein [Rattus norvegicus] | 37.1  | 14.7 |
| U47313 | Transcribed sequence with weak similarity to protein ref:NP_062289.1 (M.musculus) nuclear localization signals binding protein 1 [Mus musculus]              | 7     | 8.3  |
| U47314 | R2 cerebellum DDRT-T-PCR Rattus norvegicus cDNA clone LIARCD-5, mRNA sequence [Rattus norvegicus]                                                            | 6.4   | 5.3  |
| U47316 | Transcribed sequence with strong similarity to protein ref:NP_038746.1 (M.musculus) similar to yeast BET3 (S. cerevisiae) [Mus musculus]                     | 53.7  | 20.8 |
| U47317 | Rat R2 cerebellum DDRT-T-PCR Rattus norvegicus cDNA clone LIARCD-1, mRNA sequence [Rattus norvegicus]                                                        | 7.9   | 2.8  |
| U47921 | crystallin, alpha A                                                                                                                                          | 37.5  | 18   |
| U48220 | cytochrome P450 2d18                                                                                                                                         | 16.6  | 16.7 |
| U48245 | nel-like 2 homolog (chicken)                                                                                                                                 | 3.8   | 0.4  |
| U48246 | protein kinase C-binding protein NELL1                                                                                                                       | 3.7   | 2.3  |
| U48247 | enigma homolog                                                                                                                                               | 17    | 16.3 |
| U48247 | enigma homolog                                                                                                                                               | 13.3  | 10.9 |
| U48288 | A kinase (PRKA) anchor protein 11                                                                                                                            | 28.7  | 7.4  |
| U48592 | Interleukin 1 receptor accessory protein                                                                                                                     | 22.3  | 4.3  |
| U48592 | Interleukin 1 receptor accessory protein                                                                                                                     | 10.2  | 6.9  |
| U48596 | mitogen activated protein kinase kinase kinase 1                                                                                                             | 43.6  | 21.9 |
| U48596 | mitogen activated protein kinase kinase kinase 1                                                                                                             | 21.8  | 14.2 |
| U48828 | Rattus norvegicus retroviral-like ovarian specific transcript 30-1 mRNA                                                                                      | 8.7   | 6.3  |
| U48829 | nitric oxide synthase 2                                                                                                                                      | 60.8  | 13   |
| U49049 | discs, large (Drosophila) homolog 2 (chapsyn-110)                                                                                                            | 3.1   | 2.4  |
| U49055 | RNA binding motif protein 16                                                                                                                                 | 12.6  | 8.5  |
| U49056 | CTD-binding SR-like rA1                                                                                                                                      | 15.8  | 8.7  |
| U49058 | CTD-binding SR-like protein rA4                                                                                                                              | 34.9  | 8.9  |
| U49062 | CD24 antigen                                                                                                                                                 | 14.3  | 9.3  |
| U49062 | CD24 antigen                                                                                                                                                 | 9     | 12.4 |
| U49066 | interleukin 1 receptor-like 2                                                                                                                                | 44.4  | 38.8 |
| U49126 | calcium channel, voltage-dependent, L type, alpha 1D subunit                                                                                                 | 12.4  | 8.3  |
| U49694 | brain acyl-CoA hydrolase                                                                                                                                     | 174.7 | 77.2 |
| U49729 | bcl2-associated X protein                                                                                                                                    | 8.5   | 8    |
| U49930 | caspase 3                                                                                                                                                    | 10    | 5.9  |
| U49930 | caspase 3                                                                                                                                                    | 8.2   | 7.7  |
| U49935 | cyclin D3                                                                                                                                                    | 13.2  | 11.9 |
| U49935 | cyclin D3                                                                                                                                                    | 10.1  | 4.1  |
| U49953 | p21 (CDKN1A)-activated kinase 1                                                                                                                              | 3.6   | 1.7  |
| U50044 | Von Willebrand factor                                                                                                                                        | 30.4  | 7.1  |
| U50044 | Von Willebrand factor                                                                                                                                        | 9.4   | 6.1  |
| U50147 | discs, large homolog 3 (Drosophila)                                                                                                                          | 4.7   | 6.9  |
| U50185 | myosin phosphatase, target subunit 1                                                                                                                         | 26.5  | 13.5 |
| U50185 | myosin phosphatase, target subunit 1                                                                                                                         | 23.7  | 13.9 |
| U50353 | defensin 3a (RatNP-3a)                                                                                                                                       | 10.9  | 11.8 |
| U50355 | neutrophil defensin 4                                                                                                                                        | 4.4   | 3.1  |
| U50412 | Phosphoinositide 3-kinase, regulatory subunit, polypeptide 1 (p85 alpha)                                                                                     | 6.6   | 5.8  |
| U50707 | cyclin-dependent kinase 5, regulatory subunit 1 (p35)                                                                                                        | 8.4   | 4.7  |

|        |                                                                                    |      |      |
|--------|------------------------------------------------------------------------------------|------|------|
| U50717 | discs, large (Drosophila) homolog 2 (chapsyn-110)                                  | 19.7 | 14.4 |
| U50736 | ankyrin-like repeat protein                                                        | 23.9 | 17.2 |
| U50842 | neural precursor cell expressed, developmentally down-regulated gene 4A            | 28.6 | 3.5  |
| U50927 | solute carrier family 30, member 2                                                 | 29.5 | 20.6 |
| U50947 | taste bud receptor protein TB 334                                                  | 14.5 | 10.5 |
| U50948 | taste bud receptor protein TB 567                                                  | 9.1  | 7    |
| U50949 | taste bud receptor protein TB 641                                                  | 3.7  | 1    |
| U51013 | centaurin, alpha 1                                                                 | 97.7 | 60.3 |
| U51583 | transcription factor 8                                                             | 4.4  | 2.3  |
| U51584 | transcription factor 8                                                             | 10.6 | 9.9  |
| U51898 | phospholipase A2, group VI                                                         | 25.2 | 27.1 |
| U51919 | cortistatin                                                                        | 5.2  | 1.4  |
| U52034 | Pem gene                                                                           | 6.9  | 4.3  |
| U52034 | Pem gene                                                                           | 4.6  | 4    |
| U52102 | Collapsin response mediator protein 1                                              | 16   | 12.1 |
| U52103 | dihydropyrimidinase-like 4                                                         | 2.9  | 0.9  |
| U52104 | dihydropyrimidinase-like 3                                                         | 11.4 | 8.6  |
| U52530 | avian erythroblastosis oncogene B 3                                                | 18.5 | 12.1 |
| U52663 | Peptidylglycine alpha-amidating monooxygenase                                      | 2.5  | 1.6  |
| U52948 | complement component 9                                                             | 17.2 | 13.4 |
| U52950 | microtubule-associated protein 1b                                                  | 6.9  | 5.3  |
| U52950 | microtubule-associated protein 1b                                                  | 2.8  | 1.5  |
| U52966 | leptin receptor                                                                    | 11.9 | 9.2  |
| U53211 | amiloride-sensitive cation channel 1                                               | 8.6  | 4.7  |
| U53214 | tubulin tyrosine ligase                                                            | 17.6 | 14.2 |
| U53420 | solute carrier family 8 (sodium/calcium exchanger), member 3                       | 22.1 | 21.3 |
| U53449 | Jun dimerization protein 2                                                         | 16.6 | 9.6  |
| U53450 | Jun dimerization protein 1 (jdp-1)                                                 | 4.3  | 1.9  |
| U53486 | corticotropin releasing hormone receptor 1                                         | 38.9 | 27.2 |
| U53500 | corticotropin releasing hormone receptor 1                                         | 7    | 3    |
| U53505 | deiodinase, iodothyronine, type II                                                 | 5.7  | 3    |
| U53513 | glycine-, glutamate-, thienylcyclohexylpiperidine-binding protein                  | 18.6 | 11.1 |
| U53706 | mevalonate pyrophosphate decarboxylase                                             | 14.2 | 12   |
| U53855 | prostaglandin I2 synthase                                                          | 5.4  | 2.8  |
| U53873 | apolipoprotein B                                                                   | 7.8  | 7.2  |
| U53927 | solute carrier family 7, member 2                                                  | 6.8  | 7.1  |
| U54807 | RAB3C, member RAS oncogene family                                                  | 4.3  | 1.7  |
| U55816 | solute carrier family 12, (potassium-chloride transporter) member 5                | 5.7  | 2.8  |
| U55836 | parathyroid hormone receptor 2                                                     | 3.8  | 1.4  |
| U55849 | tumor necrosis factor receptor superfamily, member 1b                              | 5    | 2    |
| U55938 | sialyltransferase 8 C                                                              | 66   | 49.8 |
| U55995 | potassium large conductance calcium-activated channel, subfamily M, alpha member 1 | 15.7 | 9.3  |
| U56241 | v-maf musculoaponeurotic fibrosarcoma oncogene family, protein B (avian)           | 14.8 | 19.4 |
| U56261 | SNAP-25a                                                                           | 8.2  | 8.4  |
| U56407 | ubiquitin-conjugating enzyme E2D 2                                                 | 11.8 | 10.7 |
| U56732 | KRAB/zinc finger suppressor protein 1 (KS1)                                        | 8.7  | 4.3  |
| U56815 | syntaxin 6                                                                         | 13.3 | 10.5 |
| U56822 | Lymphocyte antigen 49 complex                                                      | 11   | 10.3 |
| U56839 | purinergic receptor P2Y, G-protein coupled 2                                       | 25.9 | 13.9 |
| U56853 | cytochrome P450, subfamily 21A, polypeptide 1                                      | 57.1 | 43.5 |
| U56859 | perlecan (heparan sulfate proteoglycan 2)                                          | 8.1  | 7.1  |
| U56862 | zinc finger protein 260                                                            | 12.7 | 10.4 |
| U56863 | Rattus norvegicus Ly-49.9 antigen mRNA, complete cds                               | 6    | 4    |
| U56936 | Killer cell lectin-like receptor subfamily B, member 1b                            | 5    | 2.5  |
| U57042 | adenosine kinase                                                                   | 32   | 22.3 |
| U57049 | methylenetetrahydrofolate reductase                                                | 5    | 3.9  |
| U57050 | 26S proteasome, subunit p112                                                       | 15.7 | 11.6 |
| U57062 | granzyme C                                                                         | 16.2 | 11.7 |
| U57063 | natural killer cell protease 7                                                     | 19.1 | 17.6 |
| U57097 | Aortic preferentially expressed gene 1                                             | 12   | 8.7  |
| U57391 | SH2-B PH domain containing signaling mediator 1                                    | 48   | 23.6 |
| U57391 | SH2-B PH domain containing signaling mediator 1                                    | 35.9 | 33.8 |
| U57439 | estrogen receptor 2                                                                | 12.8 | 7.7  |
| U57439 | estrogen receptor 2                                                                | 9.5  | 3.7  |
| U57499 | protein tyrosine phosphatase, non-receptor type 11                                 | 21.7 | 13.4 |
| U57499 | protein tyrosine phosphatase, non-receptor type 11                                 | 3.4  | 2.1  |
| U57501 | protein tyrosine phosphatase, receptor type, G                                     | 20.9 | 25.6 |
| U57502 | protein tyrosine phosphatase delta gene                                            | 8    | 7.8  |
| U58279 | Basic helix-loop-helix transcription factor (bHLH)                                 | 36.1 | 14.4 |
| U58466 | fibroblast growth factor receptor 1-like                                           | 33.6 | 16.6 |
| U58857 | serine (or cysteine) proteinase inhibitor, clade B, member 5                       | 6    | 7.4  |
| U58858 | junction plakoglobin                                                               | 8.4  | 2.7  |
| U58860 | alpha 1,3-fucosyltransferase Fuc-T (similar to mouse Fut4)                         | 7.2  | 9.2  |
| U59126 | TR4-NS orphan receptor (TR4)                                                       | 15.8 | 14.2 |
| U59240 | tropomodulin 2                                                                     | 10.1 | 8.9  |
| U59241 | tropomodulin 1                                                                     | 14.6 | 21.7 |
| U59245 | ATPase, Cu++ transporting, alpha polypeptide                                       | 7    | 3.9  |
| U59510 | Endothelin isopeptide 2                                                            | 3.8  | 1.5  |
| U59672 | 5-hydroxytryptamine (serotonin) receptor 3a                                        | 14.8 | 14.4 |

|        |                                                                            |       |       |
|--------|----------------------------------------------------------------------------|-------|-------|
| U59801 | Integrin alpha-M                                                           | 16.4  | 5.5   |
| U59809 | insulin-like growth factor 2 receptor                                      | 16.8  | 18    |
| U60063 | aldehyde dehydrogenase family 1, subfamily A2                              | 12.3  | 9     |
| U60096 | Integrin, beta 4                                                           | 6.5   | 3     |
| U60145 | Fragile X mental retardation 1                                             | 7.5   | 7.7   |
| U60282 | solute carrier family 5, member 5                                          | 11.9  | 14.5  |
| U60416 | myosin 5B                                                                  | 3.5   | 0.7   |
| U60562 | amelogenin                                                                 | 9.2   | 5.8   |
| U60578 | carbonic anhydrase 2                                                       | 4.1   | 2.8   |
| U61266 | Rho-associated kinase beta                                                 | 3.6   | 4.8   |
| U61373 | Proteinase-activated receptor-2, G protein-coupled receptor 11             | 20.7  | 12.6  |
| U61405 | Aryl hydrocarbon receptor nuclear translocator 2                           | 25.5  | 8.5   |
| U61772 | neurofibromatosis 2                                                        | 25.7  | 15.3  |
| U62316 | solute carrier family 16, member 7                                         | 30.8  | 13.7  |
| U62635 | mitochondrial ribosomal protein L23                                        | 22.7  | 16.9  |
| U62667 | stanniocalcin 1                                                            | 11.6  | 10.2  |
| U63111 | dentin saillophosphoprotein                                                | 6.2   | 4     |
| U63288 | metabotropic glutamate receptor 8                                          | 7.2   | 7.5   |
| U63318 | activin receptor-like kinase 7                                             | 5.8   | 9.1   |
| U63740 | protein kinase C-binding protein Zeta1                                     | 3.6   | 2.6   |
| U63839 | nucleoporin p58                                                            | 7.5   | 8.5   |
| U63840 | nucleoporin p54                                                            | 5.3   | 1.6   |
| U63971 | rhodopsin kinase                                                           | 27.1  | 10.7  |
| U63972 | opsin 1 (cone pigments), short-wave-sensitive (color blindness, tritan)    | 11.6  | 9.2   |
| U64451 | acyl-Coenzyme A dehydrogenase, short/branched chain                        | 3.6   | 1.4   |
| U65007 | met proto-oncogene                                                         | 12.1  | 10.2  |
| U65217 | Rat mRNA for MHC class II antigen RT1.B-1 beta-chain                       | 7.1   | 5.8   |
| U65417 | G protein-coupled receptor (GPR19)                                         | 41.2  | 10    |
| U65486 | beta-microseminoprotein                                                    | 12.7  | 6.4   |
| U65656 | matrix metalloproteinase 2 (72 KDa type IV collagenase)                    | 17.9  | 23.3  |
| U65916 | ankyrin 2, brain                                                           | 8.2   | 13.7  |
| U66274 | neuropeptide Y receptor Y5                                                 | 4.6   | 5.7   |
| U66292 | pregnancy-specific beta 1-glycoprotein                                     | 10    | 5.9   |
| U66293 | Rattus norvegicus pregnancy-specific beta 1-glycoprotein mRNA, partial cds | 2.3   | 0.6   |
| U66298 | bone morphogenetic protein 6                                               | 10.8  | 3.6   |
| U66322 | dithiolethione-inducible gene-1                                            | 7.2   | 5.4   |
| U66470 | cell growth regulatory with EF-hand domain                                 | 7.3   | 7.3   |
| U66471 | cell growth regulatory with ring finger domain                             | 13.4  | 10.2  |
| U66478 | MAD homolog 1 (Drosophila)                                                 | 20.7  | 20.6  |
| U66479 | MAD homolog 3 (Drosophila)                                                 | 15.6  | 11.5  |
| U66566 | protein tyrosine phosphatase, receptor type, U                             | 6.7   | 1.1   |
| U66707 | densin-180                                                                 | 19.5  | 13.1  |
| U67080 | neural zinc finger factor 3                                                | 7.4   | 2.9   |
| U67081 | myelin transcription factor 1-like                                         | 6.1   | 4.3   |
| U67082 | zinc finger protein 386 (Kruppel-like)                                     | 28.5  | 15.1  |
| U67083 | KRAB-zinc finger protein KZF-2                                             | 5.1   | 2.7   |
| U67136 | A kinase (PRKA) anchor protein 5                                           | 2.5   | 1.2   |
| U67137 | guanylate kinase associated protein                                        | 21    | 5.7   |
| U67138 | discs, large (Drosophila) homolog-associated protein 2                     | 1.7   | 0.4   |
| U67139 | PSD-95/SAP90-associated protein-3                                          | 2     | 0.7   |
| U67140 | disks large-associated protein 4                                           | 10.2  | 9.6   |
| U67140 | disks large-associated protein 4                                           | 3.7   | 1.1   |
| U67309 | nitric oxide synthase 1, neuronal                                          | 8.5   | 2.6   |
| U67777 | neurogenic differentiation 3                                               | 7.8   | 5.9   |
| U67863 | Melanocortin 4 receptor                                                    | 3.5   | 2.5   |
| U67884 | cartilage derived retinoic acid sensitive protein                          | 11.4  | 5.4   |
| U67907 | mast cell protease 4                                                       | 3.5   | 2.3   |
| U67908 | chymase 1                                                                  | 48.6  | 23.4  |
| U67911 | mast cell protease 8                                                       | 3.4   | 1.7   |
| U67913 | mast cell protease 10                                                      | 2.7   | 4.3   |
| U67914 | carboxypeptidase A3                                                        | 11    | 10.7  |
| U67915 | mast cell protease 1                                                       | 157.9 | 139.4 |
| U67987 | guanylate kinase associated protein                                        | 2     | 0.2   |
| U67994 | DNA primase, p49 subunit                                                   | 4     | 3.9   |
| U67995 | stearoyl-Coenzyme A desaturase 2                                           | 35.9  | 21.8  |
| U68168 | kynureninase (L-kynurenine hydrolase)                                      | 10.7  | 10.8  |
| U68172 | mucin (MUC2)                                                               | 49.9  | 21.1  |
| U68417 | branched chain aminotransferase 2, mitochondrial                           | 10    | 4.6   |
| U68491 | 5-hydroxytryptamine7 receptor                                              | 2.9   | 2.1   |
| U68544 | peptidylprolyl isomerase F                                                 | 59.3  | 28    |
| U68725 | Deleted in colorectal cancer (rat homolog)                                 | 2.3   | 2.2   |
| U68726 | neogenin                                                                   | 7.3   | 6     |
| U69109 | protein tyrosine kinase 2 beta                                             | 51.3  | 15.6  |
| U69272 | Interleukin 15                                                             | 31.8  | 18.6  |
| U69272 | Interleukin 15                                                             | 10.8  | 5.4   |
| U69278 | Eph receptor A3                                                            | 14.8  | 9.8   |
| U69279 | eph-related receptor tyrosine kinase ligand 7                              | 13.5  | 10.4  |
| U69550 | phospholipase D gene 1                                                     | 17.3  | 11.1  |

|        |                                                                                                                                                         |      |      |
|--------|---------------------------------------------------------------------------------------------------------------------------------------------------------|------|------|
| U69673 | Transcribed sequence with moderate similarity to protein ref:NP_035336.1 (M.musculus) protein tyrosine phosphatase, non-receptor type 18 [Mus musculus] | 66.7 | 42   |
| U69702 | activin receptor-like kinase 7                                                                                                                          | 8.6  | 10.7 |
| U69882 | potassium intermediate/small conductance calcium-activated channel, subfamily N, member 2                                                               | 9.1  | 7    |
| U69884 | potassium intermediate/small conductance calcium-activated channel, subfamily N, member 3                                                               | 6    | 5.8  |
| U70049 | jagged 2                                                                                                                                                | 7.4  | 10.6 |
| U70049 | jagged2 precursor                                                                                                                                       | 0.8  | 0.7  |
| U70210 | TR2L mRNA,                                                                                                                                              | 9.3  | 7.1  |
| U70211 | RNB6                                                                                                                                                    | 10   | 9.6  |
| U70265 | mud-5 mRNA                                                                                                                                              | 2.7  | 3.4  |
| U70268 | mud-7 mRNA                                                                                                                                              | 56.8 | 29.8 |
| U70270 | mud-4 mRNA                                                                                                                                              | 35.6 | 14.7 |
| U70372 | kinase interacting with leukemia-associated gene                                                                                                        | 10.9 | 7.8  |
| U70476 | solute carrier family 7, member 1                                                                                                                       | 11.6 | 6.6  |
| U70778 | Doc2b                                                                                                                                                   | 5.7  | 4.3  |
| U70779 | Doc2A mRNA                                                                                                                                              | 9.9  | 4.4  |
| U70988 | interleukin 8 receptor, beta                                                                                                                            | 13.7 | 6.2  |
| U71089 | interleukin 8 receptor, alpha                                                                                                                           | 42.9 | 22   |
| U71293 | hairless                                                                                                                                                | 38.8 | 18.5 |
| U71294 | synaptotagmin XII                                                                                                                                       | 7.1  | 11.6 |
| U72143 | mast cell protease 9                                                                                                                                    | 6.4  | 6.1  |
| U72349 | Bcl2-like 1                                                                                                                                             | 13.9 | 6.1  |
| U72350 | Bcl2-like 1                                                                                                                                             | 20.9 | 13.7 |
| U72353 | lamin B1                                                                                                                                                | 7.5  | 9.5  |
| U72410 | Potassium inwardly-rectifying channel, subfamily J, member 3                                                                                            | 13.8 | 16.6 |
| U72620 | pleiomorphic adenoma gene-like 1                                                                                                                        | 36   | 29   |
| U72632 | amine oxidase, copper containing 3                                                                                                                      | 32.2 | 33.2 |
| U72741 | Lectin, galactose binding, soluble 9 (Galectin-9)                                                                                                       | 46.4 | 26.1 |
| U72741 | Lectin, galactose binding, soluble 9 (Galectin-9)                                                                                                       | 13   | 14.3 |
| U72995 | MAP-kinase activating death domain                                                                                                                      | 20.2 | 15.6 |
| U73030 | pituitary tumor-transforming 1                                                                                                                          | 55   | 19.1 |
| U73142 | mitogen activated protein kinase 14                                                                                                                     | 50.1 | 28.4 |
| U73142 | mitogen activated protein kinase 14                                                                                                                     | 6    | 7.2  |
| U73174 | glutathione reductase                                                                                                                                   | 10   | 10.1 |
| U73174 | glutathione reductase                                                                                                                                   | 2.9  | 1.9  |
| U73458 | protein tyrosine phosphatase, receptor-type, N polypeptide 2                                                                                            | 19.7 | 4.2  |
| U73503 | calcium/calmodulin-dependent protein kinase (CaM kinase) II gamma                                                                                       | 1.9  | 0.4  |
| U73586 | Fanconi anemia group C                                                                                                                                  | 3.4  | 1.5  |
| U74586 | adenosine deaminase 3, RNA dependent                                                                                                                    | 7.6  | 8.7  |
| U75186 | uroguanylin                                                                                                                                             | 14.1 | 16.3 |
| U75210 | potassium voltage-gated channel, subfamily H (eag-related), member 2                                                                                    | 48.8 | 28.9 |
| U75358 | cardiolipin-activated protein kinase Pak2                                                                                                               | 8.8  | 8.9  |
| U75393 | succinate-CoA ligase, GDP-forming, alpha subunit                                                                                                        | 40.7 | 7.7  |
| U75395 | solute carrier family 12, member 4                                                                                                                      | 2.1  | 2    |
| U75397 | Krox-24 mRNA                                                                                                                                            | 9.9  | 9.5  |
| U75398 | early growth response 1                                                                                                                                 | 41.6 | 18.5 |
| U75411 | anti-idiotypic immunoglobulin M light chain                                                                                                             | 1.4  | 0.8  |
| U75412 | anti-idiotypic immunoglobulin M heavy chain                                                                                                             | 9.5  | 5.6  |
| U75689 | deoxyribonuclease I-like 3                                                                                                                              | 8.6  | 8.1  |
| U75899 | heat shock 27kD protein 2                                                                                                                               | 30.4 | 21.3 |
| U75899 | heat shock 27kD protein 2                                                                                                                               | 9.6  | 3.9  |
| U75916 | tight junction protein 2                                                                                                                                | 20.5 | 9.5  |
| U75921 | APC binding protein EB1                                                                                                                                 | 20.8 | 6.3  |
| U75923 | isoleucyl tRNA synthetase                                                                                                                               | 17.1 | 14.1 |
| U75923 | isoleucyl tRNA synthetase                                                                                                                               | 15.7 | 14.2 |
| U75925 | retinoblastoma susceptibility gene                                                                                                                      | 60.3 | 21.6 |
| U75929 | Secreted acidic cystein-rich glycoprotein (osteonectin)                                                                                                 | 27.1 | 20.5 |
| U75973 | folate hydrolase                                                                                                                                        | 10.2 | 7    |
| U76032 | phosphodiesterase 5A, cGMP-specific                                                                                                                     | 8.6  | 11.6 |
| U76206 | G protein-coupled receptor 105                                                                                                                          | 35   | 12.2 |
| U76220 | cyclic nucleotide-gated cation channel                                                                                                                  | 4.9  | 3.9  |
| U76252 | gamma-glutamyltransferase-like activity 1                                                                                                               | 22.5 | 24.4 |
| U76379 | solute carrier family 22, member 1                                                                                                                      | 4.1  | 2.6  |
| U76551 | Mucin3                                                                                                                                                  | 4.9  | 2.7  |
| U76557 | O linked N-acetylglucosamine transferase                                                                                                                | 8    | 7.7  |
| U76635 | Deoxyribonuclease I                                                                                                                                     | 52.3 | 27.7 |
| U76635 | Deoxyribonuclease I                                                                                                                                     | 10   | 6.9  |
| U76717 | PG10.2 protein                                                                                                                                          | 11.6 | 9.1  |
| U76836 | T cell receptor V alpha 2 chain subunit                                                                                                                 | 40   | 20.7 |
| U76836 | T cell receptor V alpha 2 chain subunit                                                                                                                 | 1.4  | 0.5  |
| U77349 | chemokine receptor CCR2 gene                                                                                                                            | 4.8  | 2.3  |
| U77483 | Guanine nucleotide binding protein, alpha                                                                                                               | 13.3 | 5.8  |
| U77583 | casein kinase I alpha L (CKIaL)                                                                                                                         | 32.8 | 7.9  |
| U77626 | formin binding protein 21                                                                                                                               | 17.2 | 10.9 |
| U77880 | phosphodiesterase 7A                                                                                                                                    | 10.4 | 10.4 |
| U77933 | caspase 2                                                                                                                                               | 16.4 | 15.5 |
| U77953 | somatostatin receptor-like protein                                                                                                                      | 58.7 | 24.1 |
| U78090 | potassium channel regulator 1                                                                                                                           | 10.3 | 7.7  |
| U78102 | early growth response 2                                                                                                                                 | 21.6 | 8.7  |



|        |                                                                                                    |      |      |
|--------|----------------------------------------------------------------------------------------------------|------|------|
| U78167 | cAMP-regulated guanine nucleotide exchange factor I (cAMP-GEFI)                                    | 5.6  | 4.1  |
| U78517 | cAMP-regulated guanine nucleotide exchange factor II                                               | 3.3  | 1.8  |
| U78889 | delta-like 1 (Drosophila)                                                                          | 3.1  | 1    |
| U78977 | ATPase, Class II, type 9A                                                                          | 27.6 | 15.5 |
| U78977 | ATPase, Class II, type 9A                                                                          | 11.6 | 13.4 |
| U79031 | adrenergic receptor, alpha 2a                                                                      | 8.6  | 2.7  |
| U79417 | component of rsec6/8 secretory complex p71 (71 kDa)                                                | 20.7 | 11.5 |
| U79568 | sodium channel, voltage-gated, type 9, alpha polypeptide                                           | 20.8 | 15.3 |
| U79661 | calcium-activated potassium channel beta subunit                                                   | 24.9 | 10.2 |
| U80054 | mismatch repair protein                                                                            | 20.3 | 11   |
| U80076 | ras inhibitor                                                                                      | 51.1 | 22.3 |
| U80915 | solute carrier family 1 (high affinity aspartate/glutamate transporter), member 6                  | 9.5  | 6.4  |
| U81035 | neurofascin                                                                                        | 12.4 | 8    |
| U81036 | neurofascin                                                                                        | 6.4  | 10.9 |
| U81186 | smooth muscle-specific 17 beta-hydroxysteroid dehydrogenase type 3                                 | 11.3 | 8.6  |
| U81518 | solute carrier family 14, member 1                                                                 | 10.3 | 7    |
| U81826 | clone PG23 mRNA                                                                                    | 3.9  | 4.3  |
| U82224 | titin                                                                                              | 7.4  | 2.3  |
| U82591 | putative c-Myc-responsive                                                                          | 10.1 | 7.7  |
| U82612 | Fibronectin 1                                                                                      | 21   | 5.3  |
| U82612 | Fibronectin 1                                                                                      | 8.8  | 6.5  |
| U82623 | RalA binding protein 1                                                                             | 13.8 | 16.2 |
| U82626 | chondroitin sulfate proteoglycan 6                                                                 | 4.5  | 5.2  |
| U83112 | forkhead box M1                                                                                    | 26   | 15.6 |
| U83139 | mucin 5, subtypes A and C                                                                          | 2.7  | 0.9  |
| U83230 | afadin                                                                                             | 13.6 | 9.6  |
| U83666 | budding uninhibited by benzimidazoles 1 homolog, beta (S. cerevisiae)                              | 15   | 11.2 |
| U83879 | glycerol-3-phosphate dehydrate dehydrogenase (mtGPDH)                                              | 54.1 | 12.8 |
| U83880 | Rattus norvegicus glycerol-3-phosphate dehydrate dehydrogenase (mtGPDH) mRNA, 3'UTR, mRNA sequence | 24.9 | 18.5 |
| U83883 | p105 coactivator                                                                                   | 89.7 | 19.9 |
| U83895 | pleckstrin homology, Sec7 and coiled/coil domains 1                                                | 7.1  | 5    |
| U83896 | pleckstrin homology, Sec7 and coiled/coil domains 2                                                | 32.8 | 18.8 |
| U83897 | pleckstrin homology, Sec7 and coiled/coil domains 3                                                | 4.8  | 1.8  |
| U84402 | Smoothened                                                                                         | 13.1 | 5.2  |
| U84410 | caspase 3                                                                                          | 19   | 14.2 |
| U85512 | GTP cyclohydrolase I feedback regulatory protein                                                   | 10.2 | 10.2 |
| U85513 | synaptotagmin 10                                                                                   | 3.3  | 1.5  |
| U86635 | glutathione S-transferase, mu 5                                                                    | 6.1  | 1.4  |
| U86635 | glutathione S-transferase, mu 5                                                                    | 2    | 0.7  |
| U87305 | transmembrane receptor Unc5H1                                                                      | 3    | 0.9  |
| U87960 | leukocyte common antigen receptor (LAR) gene                                                       | 10.2 | 10.8 |
| U87971 | syntaxin 5a                                                                                        | 20.3 | 11   |
| U87971 | syntaxin 5a                                                                                        | 3.2  | 2.9  |
| U87983 | Transcribed sequences                                                                              | 10.5 | 10.6 |
| U88036 | solute carrier family 21 (organic anion transporter), member 5                                     | 29.8 | 20   |
| U88157 | huntingtin-associated protein interacting protein (duo)                                            | 4.5  | 1.7  |
| U88572 | Glutamate receptor interacting protein                                                             | 9.1  | 9.5  |
| U88630 | TGFB inducible early growth response                                                               | 9.8  | 6.2  |
| U88958 | neuritin                                                                                           | 57.4 | 32.4 |
| U88986 | phospholipase D gene 1                                                                             | 13.3 | 9.3  |
| U89280 | oxidative 17 beta hydroxysteroid dehydrogenase type 6                                              | 11.3 | 13.4 |
| U89282 | telomerase protein component 1                                                                     | 60.7 | 27.5 |
| U89514 | calpain 9 (nCL-4)                                                                                  | 25.3 | 10.4 |
| U89529 | fatty acid transport protein                                                                       | 50.9 | 19.5 |
| U89608 | solute carrier family 1 (high affinity aspartate/glutamate transporter), member 6                  | 2.1  | 1    |
| U89653 | breast cancer 2                                                                                    | 10.1 | 10.6 |
| U89695 | non-histone chromosomal architectural protein HMGI-C                                               | 3.6  | 1.4  |
| U89743 | unknown protein                                                                                    | 12.3 | 8.6  |
| U89744 | putative cell surface antigen                                                                      | 22   | 8.3  |
| U89905 | alpha-methylacyl-CoA racemase                                                                      | 15.3 | 8.5  |
| U90121 | thrombomodulin                                                                                     | 7.4  | 6.7  |
| U90215 | sialyltransferase 8 (alpha-2, 8-polysialyltransferase) D                                           | 10   | 5.4  |
| U90260 | developmentally-regulated cardiac factor (DRCF-1)                                                  | 3.9  | 6.6  |
| U90261 | SH3-domain kinase binding protein 1                                                                | 4.7  | 6.9  |
| U90271 | CD152 antigen                                                                                      | 12.9 | 9    |
| U90312 | synaptotagmin 2                                                                                    | 24.2 | 14.9 |
| U90448 | CXC chemokine LIX                                                                                  | 33.4 | 8.5  |
| U90610 | Chemokine receptor (LCR1)                                                                          | 70.2 | 27.6 |
| U90610 | Chemokine receptor (LCR1)                                                                          | 41.8 | 22   |
| U90829 | APP-binding protein 1                                                                              | 20   | 15.4 |
| U90829 | APP-binding protein 1                                                                              | 13.8 | 15.8 |
| U90887 | arginase 2                                                                                         | 4.4  | 2.9  |
| U90888 | Adenosine monophosphate deaminase 3                                                                | 21.9 | 5.2  |
| U91561 | pyridoxine 5-phosphate oxidase                                                                     | 17.8 | 11.7 |
| U91561 | pyridoxine 5-phosphate oxidase                                                                     | 7.4  | 5.8  |
| U91847 | mitogen activated protein kinase 14                                                                | 11.6 | 4.8  |
| U92010 | lin-10 protein homolog                                                                             | 10.3 | 9.9  |
| U92072 | syntaxin binding protein 5 (tomosyn)                                                               | 25.4 | 11.8 |

|        |                                                                                                            |       |      |
|--------|------------------------------------------------------------------------------------------------------------|-------|------|
| U92081 | glycoprotein 38                                                                                            | 15.7  | 8.3  |
| U92284 | gamma-aminobutyric acid A receptor, epsilon                                                                | 14.2  | 13   |
| U92289 | prostaglandin D2 receptor                                                                                  | 12.2  | 10.5 |
| U92469 | gonadotropin-releasing hormone receptor                                                                    | 4.4   | 3.2  |
| U92564 | Olf-1/EBF associated Zn finger protein Roaz                                                                | 2.3   | 1.2  |
| U92564 | Olf-1/EBF associated Zn finger protein Roaz                                                                | 1.9   | 0.8  |
| U92655 | potassium voltage-gated channel, KQT-like subfamily, member 1                                              | 2.2   | 1.3  |
| U92802 | G protein-coupled receptor 30                                                                              | 14    | 8.9  |
| U92803 | CC-chemokine-binding receptor JAB61                                                                        | 20.2  | 9.1  |
| U92897 | potassium voltage gated channel, Shal-related family, member 3                                             | 11.6  | 4.8  |
| U93052 | potassium large conductance calcium-activated channel, subfamily M, alpha member 1                         | 4.9   | 4.1  |
| U93092 | Homeo box A1                                                                                               | 25.7  | 19.9 |
| U93197 | RN protein                                                                                                 | 10.3  | 10.7 |
| U93880 | insulin receptor substrate 3                                                                               | 3.5   | 2    |
| U94189 | huntingtin-associated protein interacting protein (duo)                                                    | 5.2   | 4    |
| U94322 | galanin receptor 2                                                                                         | 4.5   | 0.2  |
| U94330 | tumor necrosis factor receptor superfamily, member 11b                                                     | 4.5   | 1.4  |
| U94403 | amiloride-sensitive cation channel 2, neuronal                                                             | 7.8   | 8    |
| U94856 | paraoxonase 1                                                                                              | 3.2   | 2.8  |
| U94856 | paraoxonase 1                                                                                              | 2.6   | 1.6  |
| U94911 | ATPase, H+/K+ transporting, nongastric, alpha polypeptide                                                  | 4.7   | 2    |
| U95113 | histone H2a                                                                                                | 20.7  | 22.6 |
| U95153 | memory related gene-7                                                                                      | 11.8  | 9.5  |
| U95157 | ryanodine receptor type II                                                                                 | 7.3   | 6.7  |
| U95161 | nuclear protein E3-3                                                                                       | 12.7  | 8.9  |
| U95368 | GABA-A receptor pi subunit                                                                                 | 5.2   | 5.8  |
| U95727 | DnaJ (Hsp40) homolog, subfamily A, member 2                                                                | 13.8  | 12.3 |
| U95920 | pericentriolar material 1                                                                                  | 6.2   | 2.8  |
| U96275 | plectin                                                                                                    | 27.7  | 24.4 |
| U96490 | Yip1p-interacting factor                                                                                   | 146.6 | 41.7 |
| U96490 | Yip1p-interacting factor                                                                                   | 19.5  | 15.5 |
| U96921 | inositol polyphosphate-4-phosphatase, type II, 105kD                                                       | 19.7  | 6.4  |
| U97061 | snail homolog 2 (Drosophila)                                                                               | 11.4  | 3.9  |
| U97142 | glial cell line derived neurotrophic factor family receptor alpha 1                                        | 10.5  | 4.7  |
| U97143 | glial cell line derived neurotrophic factor family receptor alpha 2                                        | 8.5   | 5.4  |
| U97146 | Lysophospholipase 1                                                                                        | 24.6  | 17.2 |
| V01201 | Simian sarcoma virus proviral sequence with genes coding for envelope protein (env) and polymerase (pol)   | 32.9  | 20.2 |
| V01201 | Simian sarcoma virus proviral sequence with genes coding for envelope protein (env) and polymerase (pol)   | 9.1   | 9.7  |
| V01201 | Simian sarcoma virus proviral sequence with genes coding for envelope protein (env) and polymerase (pol)   | 4     | 1    |
| V01217 | cytoplasmic beta-actin                                                                                     | 36.3  | 24.6 |
| V01225 | Amylase 1                                                                                                  | 11.3  | 12.9 |
| V01235 | Fatty acid binding protein 1, liver                                                                        | 2.4   | 1.6  |
| V01244 | prolactin                                                                                                  | 4.2   | 3.8  |
| V01250 | prolactin                                                                                                  | 5.3   | 1.9  |
| V01255 | prostatic steroid-binding protein chain C1-like                                                            | 6.8   | 7.5  |
| V01274 | pancreatic trypsin 2                                                                                       | 17    | 8.5  |
| V01543 | Brain specific mRNA B (clone p1a75)                                                                        | 17.2  | 9.4  |
| X00336 | interferon-alpha 1                                                                                         | 22.3  | 6.6  |
| X00461 | Lactalbumin, alpha                                                                                         | 3.7   | 1.7  |
| X00923 | immunoglobulin epsilon heavy chain                                                                         | 18.5  | 2.4  |
| X00975 | myosin, light polypeptide 2                                                                                | 16.6  | 11.8 |
| X00975 | myosin, light polypeptide 2                                                                                | 2.9   | 1.1  |
| X01032 | cholecystokinin                                                                                            | 4.9   | 1.7  |
| X01114 | seminal vesicle protein 4                                                                                  | 3.7   | 0.8  |
| X01115 | seminal vesicle secretion 5                                                                                | 3.4   | 3.1  |
| X01118 | natriuretic peptide precursor type A                                                                       | 6     | 5.9  |
| X01454 | Thyroid stimulating hormone, beta subunit                                                                  | 2.5   | 1.5  |
| X01785 | antigen identified by monoclonal antibody MRC OX-2                                                         | 7.8   | 4.4  |
| X02002 | Thymus cell surface antigen                                                                                | 8.2   | 4.9  |
| X02231 | Glyceraldehyde-3-phosphate dehydrogenase                                                                   | 63.2  | 14.2 |
| X02231 | Glyceraldehyde-3-phosphate dehydrogenase                                                                   | 58    | 30   |
| X02291 | aldolase B                                                                                                 | 23.9  | 12.3 |
| X02309 | lingual lipase                                                                                             | 29.5  | 12.7 |
| X02318 | Thyroglobulin                                                                                              | 9.8   | 7.1  |
| X02318 | Thyroglobulin                                                                                              | 6.9   | 9    |
| X02322 | growth hormone releasing hormone                                                                           | 63    | 50.5 |
| X02341 | vasoactive intestinal polypeptide                                                                          | 15.8  | 11.4 |
| X02361 | alpha-fetoprotein                                                                                          | 11.8  | 8.9  |
| X02361 | alpha-fetoprotein                                                                                          | 3.3   | 1.1  |
| X02741 | tyrosine aminotransferase                                                                                  | 9.3   | 7.6  |
| X03015 | CD8 antigen, alpha-chain                                                                                   | 8.6   | 8.2  |
| X03347 | REMSVFBF murine osteosarcoma provirus genome                                                               | 18.6  | 14.5 |
| X03347 | REMSVFBF murine osteosarcoma provirus genome                                                               | 11.7  | 6    |
| X03362 | Avian erythroblastosis viral (v-erb-B2) oncogene homologue 2 (neuro/glioblastoma derived oncogene homolog) | 19.6  | 13.3 |
| X03369 | Rat mRNA for beta-tubulin T beta15                                                                         | 3.7   | 3.9  |

|        |                                                                                              |       |       |
|--------|----------------------------------------------------------------------------------------------|-------|-------|
| X03453 | ----                                                                                         | 16    | 1.7   |
| X03453 | ----                                                                                         | 6.6   | 1.5   |
| X03468 | apolipoprotein A-II                                                                          | 6     | 6.5   |
| X03478 | UDP glycosyltransferase 2 family, polypeptide B                                              | 1.9   | 0.5   |
| X03518 | gamma-glutamyl transpeptidase                                                                | 3.9   | 1.1   |
| X03894 | uncoupling protein 1                                                                         | 3.2   | 2     |
| X03914 | IL-3                                                                                         | 10.5  | 8.7   |
| X04069 | liver glycogen phosphorylase                                                                 | 17.5  | 10.4  |
| X04070 | gap junction membrane channel protein beta 1                                                 | 22.7  | 9.1   |
| X04267 | myosin, heavy polypeptide 3                                                                  | 382.3 | 186.2 |
| X04310 | CD8 antigen, beta-chain                                                                      | 31.9  | 16.9  |
| X04603 | ----                                                                                         | 1.9   | 0.4   |
| X04603 | ----                                                                                         | 7.3   | 12.5  |
| X04603 | ----                                                                                         | 3.3   | 1.5   |
| X04644 | progastricsin                                                                                | 8.1   | 5.3   |
| X05023 | mannose-binding protein C (liver)                                                            | 11.1  | 11.4  |
| X05034 | Rat messenger RNA for prostatic steroid binding protein (subunit C2)                         | 2     | 1.3   |
| X05111 | CD2 antigen                                                                                  | 2.5   | 2     |
| X05137 | nerve growth factor receptor                                                                 | 133.8 | 74.7  |
| X05684 | pyruvate kinase, liver and RBC                                                               | 6.8   | 4.9   |
| X05831 | Fibronectin 1                                                                                | 4.4   | 2.1   |
| X05861 | fibrinogen gamma-chain                                                                       | 6.5   | 6.1   |
| X05900 | crystallin beta B1                                                                           | 15.6  | 8.5   |
| X06107 | insulin-like growth factor 1                                                                 | 48.5  | 18    |
| X06107 | insulin-like growth factor 1                                                                 | 17.8  | 3.8   |
| X06150 | Glycine methyltransferase                                                                    | 16.6  | 8.6   |
| X06150 | Glycine methyltransferase                                                                    | 1     | 0.8   |
| X06357 | serine pyruvate aminotransferase                                                             | 3.6   | 0.7   |
| X06377 | beta-B1 gene N-terminus for lens betaB1-crystallin                                           | 3.8   | 1.3   |
| X06554 | Myelin-associated glycoprotein                                                               | 37.1  | 15.3  |
| X06564 | neural cell adhesion molecule 1                                                              | 22.3  | 18.1  |
| X06655 | Synaptophysin                                                                                | 31    | 11.5  |
| X06656 | gap junction membrane channel protein alpha 1                                                | 27.8  | 17.4  |
| X06769 | c-fos                                                                                        | 158.5 | 65.1  |
| X06769 | c-fos                                                                                        | 6.4   | 5.3   |
| X06801 | vaskular alpha-actin                                                                         | 55.3  | 31.5  |
| X06801 | vaskular alpha-actin                                                                         | 0.9   | 0.3   |
| X06827 | Hydroxymethylbilane synthase                                                                 | 8.6   | 9.5   |
| X06827 | Hydroxymethylbilane synthase                                                                 | 4.4   | 1.9   |
| X06832 | chromogranin A                                                                               | 5.2   | 2.3   |
| X06889 | RAB3A, member RAS oncogene family                                                            | 7.2   | 5.2   |
| X06890 | RAB4A, member RAS oncogene family                                                            | 4.2   | 2.7   |
| X06942 | A-raf                                                                                        | 125.3 | 69.3  |
| X06984 | aldolase C, fructose-biphosphate                                                             | 19.9  | 9     |
| X07189 | Ig heavy chain constant region                                                               | 31.4  | 10.9  |
| X07259 | cytochrome P450, 4a10                                                                        | 12.5  | 7.3   |
| X07266 | gene 33 polypeptide                                                                          | 16.7  | 4     |
| X07285 | basic fibroblast growth factor                                                               | 7.7   | 5.3   |
| X07286 | protein kinase C alpha                                                                       | 24.4  | 12.4  |
| X07287 | protein kinase C, gamma                                                                      | 19.4  | 11.5  |
| X07314 | heart myosin light chain 2 (MLC2)                                                            | 18.8  | 10.7  |
| X07314 | heart myosin light chain 2 (MLC2)                                                            | 0.7   | 0.2   |
| X07320 | Phosphorylase kinase, gamma 1                                                                | 149.8 | 67.7  |
| X07551 | MHC RT1.B-alpha gene for class II antigen                                                    | 17.9  | 7.9   |
| X07636 | asialoglycoprotein receptor 2                                                                | 7.6   | 5.5   |
| X07648 | Amyloid beta (A4) precursor protein                                                          | 93.3  | 19.2  |
| X07729 | neuron-specific enolase                                                                      | 34.7  | 13.9  |
| X12459 | arginosuccinate synthetase                                                                   | 3.1   | 1.1   |
| X12554 | cytochrome c oxidase, subunit VIa, polypeptide 2                                             | 107.3 | 28.1  |
| X12589 | potassium voltage-gated channel, shaker-related subfamily, member 1                          | 66.8  | 31.7  |
| X12744 | thyroid hormone receptor alpha                                                               | 49    | 13.3  |
| X12748 | epidermal growth factor                                                                      | 9.3   | 9.1   |
| X12752 | CCAAT/enhancer binding protein, alpha                                                        | 7.6   | 2.9   |
| X12957 | gamma crystallin gene cluster.                                                               | 7.8   | 10.9  |
| X13044 | CD74 antigen (invariant polypeptide of major histocompatibility class II antigen-associated) | 6.3   | 5     |
| X13044 | CD74 antigen (invariant polypeptide of major histocompatibility class II antigen-associated) | 3.8   | 4.4   |
| X13058 | tumor protein p53                                                                            | 14    | 4.4   |
| X13098 | urate oxidase                                                                                | 4.1   | 2.5   |
| X13119 | serine dehydratase                                                                           | 2.6   | 0.8   |
| X13167 | nuclear factor I/A                                                                           | 2.3   | 1.3   |
| X13176 | surfactant, pulmonary-associated protein A1                                                  | 5.2   | 6.4   |
| X13309 | extracellular proteinase inhibitor                                                           | 16.3  | 16.9  |
| X13412 | flk protein                                                                                  | 25.8  | 16.2  |
| X13412 | flk protein                                                                                  | 8.7   | 5.1   |
| X13722 | Low density lipoprotein receptor                                                             | 10.4  | 9.6   |
| X13804 | Neurofilament, heavy polypeptide                                                             | 30.9  | 9.3   |
| X13983 | alpha-2-macroglobulin                                                                        | 48.6  | 15.6  |
| X14115 | gamma crystallin gene cluster.                                                               | 24.4  | 7.9   |
| X14221 | Surfactant, pulmonary-associated protein C                                                   | 7     | 4.4   |

|        |                                                                                              |       |       |
|--------|----------------------------------------------------------------------------------------------|-------|-------|
| X14232 | fibroblast growth factor 1                                                                   | 41    | 18.5  |
| X14254 | MHC class II-associated invariant chain                                                      | 10.2  | 8     |
| X14254 | CD74 antigen (invariant polypeptide of major histocompatibility class II antigen-associated) | 7.8   | 7.9   |
| X14318 | T-cell receptor alpha chain                                                                  | 3.4   | 1.9   |
| X14319 | T-cell receptor beta chain                                                                   | 10.4  | 5.1   |
| X14319 | T-cell receptor beta chain                                                                   | 4.9   | 3.7   |
| X14552 | alpha-2u globulin PGCL4                                                                      | 21.1  | 17    |
| X14674 | protamine 2                                                                                  | 15.2  | 10.9  |
| X14776 | transition protein 2                                                                         | 8.3   | 3.4   |
| X14788 | cAMP response element binding protein 1                                                      | 27.6  | 15.4  |
| X14812 | Myosin light chain 3, alkali, cardiac ventricles                                             | 21.7  | 13.3  |
| X15143 | beta A3/A1 crystallin                                                                        | 13    | 11.1  |
| X15143 | beta A3/A1 crystallin                                                                        | 5.4   | 3.4   |
| X15466 | gamma-aminobutyric acid receptor, subunit beta 1                                             | 13.8  | 13    |
| X15467 | Gamma-aminobutyric acid receptor beta 2                                                      | 17    | 10    |
| X15468 | Gamma-aminobutyric acid receptor beta 3                                                      | 11.2  | 7.4   |
| X15512 | apolipoprotein C-I                                                                           | 35.8  | 10.6  |
| X15546 | Sucrase-isomaltase                                                                           | 2.7   | 0.8   |
| X15551 | beta-2 glycoprotein I                                                                        | 5.5   | 4.2   |
| X15551 | beta-2 glycoprotein I                                                                        | 1.6   | 0.5   |
| X15580 | 6-phosphofructo-2-kinase/fructose-2,6-biphosphatase 1                                        | 6.8   | 3.3   |
| X15679 | preprotrypsinogen IV                                                                         | 69.3  | 38.5  |
| X15705 | testis-specific heat shock protein-related gene hst70                                        | 1.1   | 0.9   |
| X15734 | methionine adenosyltransferase I, alpha                                                      | 25.6  | 10.9  |
| X15939 | myosin heavy chain, polypeptide 7                                                            | 23.4  | 22.2  |
| X15939 | myosin heavy chain, polypeptide 7                                                            | 2.8   | 0.8   |
| X15939 | myosin heavy chain, polypeptide 7                                                            | 1.7   | 0.7   |
| X15958 | enoyl Coenzyme A hydratase, short chain 1                                                    | 115.5 | 47.2  |
| X16002 | potassium voltage gated channel, shaker related subfamily, member 4                          | 26.8  | 13.1  |
| X16003 | potassium voltage-gated channel, shaker-related subfamily, member 2                          | 6.3   | 2     |
| X16038 | alkaline phosphatase                                                                         | 39.8  | 24.1  |
| X16054 | Carboxyl ester lipase                                                                        | 13    | 4.6   |
| X16058 | interleukin 4 (IL-4)                                                                         | 9.2   | 5.8   |
| X16072 | crystallin, beta B2                                                                          | 37.7  | 7.2   |
| X16261 | myosin heavy chain 11                                                                        | 4.4   | 5.1   |
| X16262 | myosin heavy chain 11                                                                        | 11.6  | 10.6  |
| X16273 | serine (or cysteine) proteinase inhibitor, clade A, member 1                                 | 3.5   | 5.3   |
| X16273 | serine (or cysteine) proteinase inhibitor, clade A, member 1                                 | 2.6   | 1.1   |
| X16476 | Potassium voltage gated channel, Shab-related subfamily, member 1                            | 6.4   | 5.6   |
| X16481 | parathymosin                                                                                 | 214.3 | 131.4 |
| X16554 | phosphoribosyl pyrophosphate synthetase 1                                                    | 14.9  | 7.5   |
| X16555 | phosphoribosyl pyrophosphate synthetase 2                                                    | 9.4   | 10.7  |
| X16623 | microtubule-associated protein 1b                                                            | 10.3  | 12.1  |
| X16703 | Insulin-like growth factor II (somatomedin A)                                                | 18.1  | 13    |
| X16933 | RNA binding protein p45AUF1                                                                  | 30.2  | 13.3  |
| X17012 | Insulin-like growth factor II (somatomedin A)                                                | 14    | 13.2  |
| X17013 | ---                                                                                          | 3.4   | 2.6   |
| X17013 | ---                                                                                          | 7     | 9.6   |
| X17013 | ---                                                                                          | 9.1   | 9.7   |
| X17037 | tumor necrosis factor superfamily, member 4                                                  | 10.4  | 5.2   |
| X17163 | v-jun sarcoma virus 17 oncogene homolog (avian)                                              | 5.3   | 2.1   |
| X17184 | glutamate receptor, ionotropic, AMPA1 (alpha 1)                                              | 2.3   | 0.5   |
| X17607 | adrenergic receptor, beta 2                                                                  | 33.7  | 25.7  |
| X17611 | Alkaline phosphatase 1, intestinal, defined by SSR                                           | 15.7  | 9.8   |
| X17621 | potassium voltage gated channel, shaker related subfamily, member 6                          | 3.1   | 3.4   |
| X17682 | microtubule-associated protein 2                                                             | 1.8   | 1.4   |
| X51415 | lipase, hormone sensitive                                                                    | 13.1  | 9.7   |
| X51529 | phospholipase A2, group IIA (platelets, synovial fluid)                                      | 26.6  | 6.1   |
| X51531 | atrial myosin light chain 1                                                                  | 7.2   | 6.2   |
| X51531 | atrial myosin light chain 1                                                                  | 4.5   | 5     |
| X51615 | connexin protein Cx26                                                                        | 7.2   | 8.7   |
| X51781 | S-antigen                                                                                    | 14.2  | 8.8   |
| X51991 | gamma-aminobutyric acid receptor, subunit alpha 3                                            | 5.6   | 2     |
| X51992 | gamma-aminobutyric acid A receptor, alpha 5                                                  | 10.1  | 6.7   |
| X52082 | T-cell alloantigen RT6.1                                                                     | 7.7   | 3.1   |
| X52140 | integrin alpha 1                                                                             | 30.4  | 26.2  |
| X52196 | arachidonate 5-lipoxygenase activating protein                                               | 68.9  | 25.2  |
| X52376 | peripherin 2                                                                                 | 11.6  | 5.8   |
| X52583 | nuclear pore glycoprotein P62                                                                | 12.7  | 8.1   |
| X52625 | 3-hydroxy-3-methylglutaryl-Coenzyme A synthase 1                                             | 25.3  | 10.6  |
| X52713 | myxovirus (influenza virus) resistance 3                                                     | 22.8  | 20.8  |
| X52772 | p65 mRNA                                                                                     | 2.3   | 1.3   |
| X52817 | reticulon 1                                                                                  | 4.1   | 1.4   |
| X52820 | Islet amyloid polypeptide                                                                    | 9.7   | 9.5   |
| X52840 | myosin regulatory light chain                                                                | 34.6  | 31    |
| X52952 | v-mos moloney murine sarcoma viral oncogene homolog                                          | 8.4   | 6.5   |
| X53052 | main intrinsic protein                                                                       | 7.2   | 10.1  |
| X53054 | Rat mRNA for RT1.D beta chain                                                                | 20.7  | 24.6  |
| X53054 | Rat mRNA for RT1.D beta chain                                                                | 5     | 5.5   |

|        |                                                                                                                                      |       |      |
|--------|--------------------------------------------------------------------------------------------------------------------------------------|-------|------|
| X53087 | interleukin 4                                                                                                                        | 2.2   | 0.6  |
| X53231 | preoptic regulatory factor-1                                                                                                         | 16.5  | 7.6  |
| X53232 | preoptic regulatory factor-2                                                                                                         | 9.1   | 1.8  |
| X53427 | glycogen synthase kinase 3 alpha                                                                                                     | 107.8 | 61.1 |
| X53430 | CD3 antigen delta polypeptide                                                                                                        | 5.5   | 0.5  |
| X53455 | microtubule-associated protein 2                                                                                                     | 7.6   | 7.8  |
| X53501 | tryptophan hydroxylase                                                                                                               | 3.3   | 2.2  |
| X53565 | trans-golgi network protein 1                                                                                                        | 9.3   | 6.7  |
| X53581 | long interspersed repetitive DNA containing 7 ORF's                                                                                  | 39.1  | 13.2 |
| X53588 | Glucokinase                                                                                                                          | 16    | 9.6  |
| X53724 | achaete-scute complex homolog-like 2 (Drosophila)                                                                                    | 5.4   | 1.7  |
| X53773 | adaptor protein complex AP-2, alpha 2 subunit                                                                                        | 31.2  | 14.2 |
| X53858 | Thyroid transcription factor 1 TTF-1 NK-2 (Drosophila) homolog A (thyroid nuclear factor)                                            | 9.4   | 6.8  |
| X53949 | galactose-4-epimerase, UDP                                                                                                           | 10    | 10.3 |
| X54096 | Lecithin-cholesterol acyltransferase                                                                                                 | 3.7   | 2.6  |
| X54249 | human immunodeficiency virus type 1 enhancer-binding protein 2                                                                       | 10.6  | 9.2  |
| X54250 | zinc finger protein AT-BP2                                                                                                           | 3.9   | 6.7  |
| X54400 | hepatocyte growth factor                                                                                                             | 93.6  | 46.9 |
| X54419 | Interleukin 5 (colony-stimulating factor, eosinophil)                                                                                | 10.7  | 12.2 |
| X54423 | transcription factor 1                                                                                                               | 32.7  | 16.2 |
| X54531 | dynamitin 1                                                                                                                          | 32.3  | 14.8 |
| X54656 | glutamate receptor, ionotropic, AMPA3 (alpha 3)                                                                                      | 3.4   | 2.5  |
| X54686 | jun B proto-oncogene                                                                                                                 | 30.6  | 13.2 |
| X54798 | glyceraldehyde-3-phosphate dehydrogenase                                                                                             | 7     | 7.3  |
| X54806 | R.norvegicus mRNA for cytokeratin type I (3' end)                                                                                    | 13.3  | 8.2  |
| X54862 | O6-methylguanine-DNA methyltransferase                                                                                               | 16.5  | 9.1  |
| X55183 | amphiregulin                                                                                                                         | 8.1   | 6.5  |
| X55246 | Glycine receptor, alpha 1 subunit                                                                                                    | 17.3  | 13.1 |
| X55286 | 3-hydroxy-3-methylglutaryl-Coenzyme A reductase                                                                                      | 8.1   | 9.2  |
| X55286 | 3-hydroxy-3-methylglutaryl-Coenzyme A reductase                                                                                      | 3.4   | 3.6  |
| X55288 | CD28 antigen                                                                                                                         | 5.2   | 3    |
| X55446 | arachidonic acid epoxigenase                                                                                                         | 23.9  | 14.3 |
| X55519 | Cyclic nucleotide gated channel 4                                                                                                    | 10.4  | 8.4  |
| X55572 | apolipoprotein D                                                                                                                     | 20.4  | 11   |
| X55660 | Proprotein convertase subtilisin/kexin type 3 (paired basic amino acid cleaving enzyme, furin, membrane associated receptor protein) | 77.9  | 52.4 |
| X55812 | Cannabinoid receptor 1                                                                                                               | 2.8   | 1.4  |
| X55955 | hepatocyte nuclear factor 3, alpha                                                                                                   | 6.2   | 6.3  |
| X56065 | dopamine receptor 2                                                                                                                  | 7.3   | 2.2  |
| X56228 | thiosulfate sulfurtransferase                                                                                                        | 13.2  | 4.3  |
| X56306 | Tachykinin (substance P, neurokinin A, neuropeptide K, neuropeptide gamma)                                                           | 20.6  | 9.2  |
| X56325 | hemoglobin, alpha 1                                                                                                                  | 6.6   | 9.1  |
| X56326 | epsilon 1 globin                                                                                                                     | 9.7   | 6.1  |
| X56327 | epsilon 2 globin                                                                                                                     | 14.4  | 4.9  |
| X56327 | epsilon 2 globin                                                                                                                     | 5.7   | 6.2  |
| X56420 | N-methylpurine-DNA glycosylase                                                                                                       | 4.6   | 2.3  |
| X56448 | mRNA for gp42 (clone 1)                                                                                                              | 6     | 5.4  |
| X56541 | membrane-spanning proteoglycan NG2                                                                                                   | 14.7  | 9.4  |
| X56546 | transcription factor 2                                                                                                               | 26.4  | 13.4 |
| X56551 | fibroblast growth factor 7                                                                                                           | 10.4  | 6.8  |
| X56596 | Rat mRNA for MHC class II antigen RT1.B-1 beta-chain                                                                                 | 20.7  | 11.2 |
| X56661 | Gastrin-releasing peptide receptor                                                                                                   | 32.5  | 17.9 |
| X56729 | Calpastatin                                                                                                                          | 23    | 15.6 |
| X56729 | Calpastatin                                                                                                                          | 17.6  | 10.7 |
| X56747 | fetal intestinal lactase-phlorizin hydrolase precursor, partial                                                                      | 44    | 17.4 |
| X56917 | inositol 1,4,5-triphosphate 3-kinase                                                                                                 | 5.2   | 1.3  |
| X57018 | FGR                                                                                                                                  | 6.9   | 2.7  |
| X57133 | hepatocyte nuclear factor 4, alpha                                                                                                   | 11.2  | 7.8  |
| X57133 | hepatocyte nuclear factor 4, alpha                                                                                                   | 5.3   | 4.8  |
| X57169 | crystallin, gamma D                                                                                                                  | 36.3  | 26.7 |
| X57169 | crystallin, gamma D                                                                                                                  | 36    | 6.9  |
| X57281 | Glycine receptor alpha 2 subunit (glycine receptor, neonatal)                                                                        | 6.3   | 8.3  |
| X57405 | homologue of Drosophila notch protein                                                                                                | 39.6  | 19.4 |
| X57405 | homologue of Drosophila notch protein                                                                                                | 5.5   | 4.2  |
| X57514 | gamma-aminobutyric acid (GABA) A receptor, gamma 1                                                                                   | 25.8  | 7.3  |
| X57565 | UDP glycosyltransferase 2 family, polypeptide A1                                                                                     | 8.3   | 4.1  |
| X57573 | Glutamate decarboxylase 1 (brain)                                                                                                    | 10.5  | 9.9  |
| X57659 | adrenergic receptor, alpha 2c                                                                                                        | 5.8   | 3.3  |
| X57764 | endothelin receptor type B                                                                                                           | 16.8  | 13.2 |
| X57970 | connexin 46                                                                                                                          | 26.1  | 13.3 |
| X57988 | peroxisome assembly factor-1 (PAF-1)                                                                                                 | 19.9  | 15.5 |
| X57999 | deiodinase, iodothyronine, type I                                                                                                    | 13    | 9.5  |
| X58294 | carbonic anhydrase 2                                                                                                                 | 21.6  | 11.3 |
| X58375 | Insulin receptor substrate 1                                                                                                         | 16.8  | 7.6  |
| X58828 | protein tyrosine phosphatase, non-receptor type 2                                                                                    | 13.9  | 10   |
| X58830 | bone morphogenetic protein 6                                                                                                         | 33.1  | 12.1 |
| X58865 | Phosphofructokinase, liver, B-type                                                                                                   | 54.8  | 23.2 |
| X59012 | trypsin V a-form                                                                                                                     | 3.9   | 3.7  |
| X59132 | secretin receptor                                                                                                                    | 22.8  | 10.8 |

|        |                                                                                                                            |       |       |
|--------|----------------------------------------------------------------------------------------------------------------------------|-------|-------|
| X59149 | neural cell adhesion molecule L1                                                                                           | 15.9  | 11.1  |
| X59249 | adenosine A3 receptor                                                                                                      | 15.3  | 14.6  |
| X59290 | eph and elk-related kinase                                                                                                 | 3     | 1.5   |
| X59608 | RNA PolII-c-DNA                                                                                                            | 59.3  | 8.2   |
| X59677 | solute carrier family 13, member 2                                                                                         | 137.5 | 14.8  |
| X59736 | sarcomeric mitochondrial creatine kinase                                                                                   | 3.8   | 6.2   |
| X59736 | sarcomeric mitochondrial creatine kinase                                                                                   | 3.1   | 1.4   |
| X59737 | ubiquitous mitochondrial creatine kinase                                                                                   | 19.1  | 17.9  |
| X59832 | epididymal retinoic acid-binding protein                                                                                   | 8.2   | 8.3   |
| X59859 | decorin                                                                                                                    | 54.2  | 76.3  |
| X59859 | decorin                                                                                                                    | 35.1  | 23    |
| X59864 | ASM15 gene                                                                                                                 | 15.4  | 18.9  |
| X59864 | ASM15 gene                                                                                                                 | 8.7   | 4.9   |
| X59949 | brain nitric oxide synthase                                                                                                | 4.6   | 2     |
| X59961 | H2A and H2B histones                                                                                                       | 33    | 21    |
| X59962 | testis-specific histone 2a                                                                                                 | 3.3   | 2.3   |
| X59993 | probable zinc finger protein                                                                                               | 12.7  | 9.9   |
| X59996 | Glutamate receptor, ionotropic, kainate 4                                                                                  | 1.6   | 0.7   |
| X60290 | Rat anti-acetylcholine receptor antibody gene, rearranged Ig gamma-2a chain, VDJC region, complete cds                     | 5     | 4.1   |
| X60328 | cytosolic epoxide hydrolase                                                                                                | 12    | 14    |
| X60328 | cytosolic epoxide hydrolase                                                                                                | 4.9   | 5.3   |
| X60351 | crystallin, alpha B                                                                                                        | 4.4   | 2.9   |
| X60468 | amyloid beta (A4) precursor protein-binding, family B, member 1                                                            | 16.2  | 6     |
| X60469 | amyloid beta (A4) precursor protein-binding, family B, member 1                                                            | 19    | 13.3  |
| X60651 | syndecan 1                                                                                                                 | 20.7  | 15.4  |
| X60658 | RYA3 mRNA for a potential ligand-binding protein                                                                           | 2.5   | 0.7   |
| X60659 | RYF5 mRNA for a potential ligand-binding protein                                                                           | 17.4  | 11.7  |
| X60660 | RY2G5 mRNA for a potential ligand-binding protein                                                                          | 3.7   | 2.9   |
| X60660 | RRRY2G5 R.rattus RY2G5 mRNA for a potential ligand-binding protein                                                         | 2.3   | 1.7   |
| X60661 | RYD5 mRNA for a potential ligand-binding protein                                                                           | 11.2  | 7.3   |
| X60675 | Interleukin 10                                                                                                             | 13.7  | 10.3  |
| X60767 | cell division cycle 2 homolog A (S. pombe)                                                                                 | 18.1  | 17.6  |
| X61106 | ORF for P-glycoprotein (3'-most exon) containing epitope for P-glycoprotein monoclonal antibody, C219                      | 3.7   | 3.7   |
| X61388 | ----                                                                                                                       | 2.2   | 1.8   |
| X61479 | CSF-1 receptor                                                                                                             | 12.3  | 10.7  |
| X61677 | inositol 1,4,5-triphosphate receptor 2                                                                                     | 5.1   | 5.6   |
| X61933 | HKA gene (exons 1-3) for H+/K+-ATPase alpha subunit                                                                        | 8     | 9.6   |
| X62086 | cytochrome P450 PCN1                                                                                                       | 24.6  | 23.2  |
| X62160 | dynactin 1                                                                                                                 | 56.8  | 11    |
| X62295 | angiotensin receptor 1a                                                                                                    | 14.9  | 6.4   |
| X62323 | transcription factor E2a                                                                                                   | 8.9   | 9.2   |
| X62325 | TcRValphaT48a2 mRNA for T cell receptor V-alpha J-alpha                                                                    | 288.8 | 231.9 |
| X62325 | TcRValphaT48a2 mRNA for T cell receptor V-alpha J-alpha                                                                    | 23.3  | 26.1  |
| X62325 | TcRValphaT48a2 mRNA for T cell receptor V-alpha J-alpha                                                                    | 14.4  | 7.7   |
| X62327 | TcRValphaQ4a23 mRNA for T cell receptor V-alpha J-alpha                                                                    | 12.9  | 9.4   |
| X62404 | epididymal secretory glutathione peroxidase                                                                                | 1     | 0.9   |
| X62660 | glutathione transferase subunit 8                                                                                          | 17.9  | 19.2  |
| X62660 | glutathione transferase subunit 8                                                                                          | 15.7  | 6     |
| X62839 | potassium voltage gated channel, Shaw-related subfamily, member 2                                                          | 6.9   | 7.1   |
| X62840 | potassium channel protein (3145 bp)                                                                                        | 17.8  | 13.2  |
| X62841 | potassium channel protein (2858 bp)                                                                                        | 22.6  | 6.1   |
| X62875 | high mobility group AT-hook 1                                                                                              | 131.8 | 51.5  |
| X62875 | high mobility group AT-hook 1                                                                                              | 42.2  | 23.6  |
| X62894 | chloride channel 1                                                                                                         | 6.3   | 3.1   |
| X62950 | Rat VL30 element mRNA                                                                                                      | 57    | 45.9  |
| X62950 | Rat VL30 element mRNA                                                                                                      | 21.5  | 17.9  |
| X62951 | mRNA (pBUS19) with repetitive elements                                                                                     | 5.7   | 6.3   |
| X63143 | syndecan 3                                                                                                                 | 18.4  | 8.2   |
| X63253 | solute carrier family 6, member 4                                                                                          | 10.6  | 9.6   |
| X63281 | Transcribed sequence with strong similarity to protein pir:S20073 (R.norvegicus) S20073 transforming protein (N-myc) - rat | 4     | 2.2   |
| X63369 | zinc finger protein 36                                                                                                     | 134.8 | 47.8  |
| X63375 | beta-1 subunit of Na,K-ATPase                                                                                              | 33.8  | 29    |
| X63410 | sulfotransferase family, cytosolic, 2A, dehydroepiandrosterone (DHEA) -preferring, member 1                                | 15.2  | 8.1   |
| X63446 | alpha-2-HS-glycoprotein                                                                                                    | 38.5  | 18.6  |
| X63545 | cytochrome P450, 2b19                                                                                                      | 3.9   | 1.4   |
| X63574 | somatostatin receptor 28                                                                                                   | 14    | 11.9  |
| X63675 | proviral integration site 1                                                                                                | 12.1  | 10.8  |
| X63722 | Vascular cell adhesion molecule 1                                                                                          | 21.4  | 11.4  |
| X63744 | solute carrier family 1, member 3                                                                                          | 13    | 5.7   |
| X63744 | solute carrier family 1, member 3                                                                                          | 10.1  | 7.5   |
| X63854 | transporter 2, ATP-binding cassette, sub-family B (MDR/TAP)                                                                | 15.9  | 18.2  |
| X63995 | solute carrier family 6, member 4                                                                                          | 104.4 | 66.1  |
| X64052 | angiotensin II type-1 receptor                                                                                             | 18.6  | 20.9  |
| X64336 | Protein C                                                                                                                  | 10.8  | 9.6   |
| X64401 | cytochrome P-450PCN (PNCN inducible)                                                                                       | 4.7   | 1.9   |
| X64403 | CCAAT/enhancer binding protein .gamma                                                                                      | 8.2   | 7     |

|        |                                                                              |      |      |
|--------|------------------------------------------------------------------------------|------|------|
| X64563 | plasminogen activator inhibitor 2 type A                                     | 7    | 5.2  |
| X64589 | Cyclin B1                                                                    | 37.1 | 24.1 |
| X64827 | Cytochrom c oxidase subunit VIII-H (heart/muscle)                            | 1.9  | 0.5  |
| X65036 | integrin alpha 7                                                             | 35.3 | 25.5 |
| X65036 | integrin alpha 7                                                             | 3.7  | 0.5  |
| X65083 | cytosolic epoxide hydrolase                                                  | 8.9  | 5.7  |
| X65190 | b5R gene, erythroid-specific exon 1                                          | 41.7 | 22.2 |
| X65296 | carboxylesterase 3                                                           | 5.5  | 1.3  |
| X65454 | SC65 synaptonemal complex protein                                            | 5.6  | 4.6  |
| X65454 | SC65 synaptonemal complex protein                                            | 1.8  | 0.8  |
| X65747 | gustducin                                                                    | 5.1  | 6.4  |
| X65948 | general transcription factor IIB                                             | 26.9 | 15   |
| X65953 | 6-phosphofructo-2-kinase/fructose-2,6-bisphosphatase 2                       | 8.9  | 6.9  |
| X66022 | neuronal d4 domain family member                                             | 28   | 16.2 |
| X66022 | neuronal d4 domain family member                                             | 4.8  | 7    |
| X66140 | a disintegrin and metalloprotease domain 7                                   | 40.2 | 28.5 |
| X66366 | gephyrin                                                                     | 19.2 | 7.3  |
| X66494 | choline transporter                                                          | 20.1 | 23.4 |
| X66693 | granzyme B                                                                   | 15.1 | 15.1 |
| X66840 | microtubule-associated protein 1 A                                           | 20.4 | 8.6  |
| X66842 | 5-hydroxytryptamine (serotonin) receptor 2B                                  | 27.6 | 10.8 |
| X66845 | dynein, cytoplasmic, intermediate chain 1                                    | 8.1  | 3.9  |
| X66974 | calbindin 2                                                                  | 68.4 | 36.4 |
| X67108 | brain derived neurotrophic factor                                            | 8.2  | 11.6 |
| X67241 | guanine nucleotide releasing factor for RAS P21                              | 9.9  | 8.1  |
| X67250 | chimerin (chimaerin) 1                                                       | 24.4 | 16.4 |
| X67504 | RT1 class Ib gene                                                            | 20.4 | 16.9 |
| X67654 | Glutathione S-transferase 1 (theta)                                          | 5.3  | 2.6  |
| X67788 | villin 2                                                                     | 27.6 | 16   |
| X67805 | Synaptonemal complex protein 1                                               | 28.7 | 21.6 |
| X67859 | Sjogren syndrome antigen B                                                   | 9.1  | 8.9  |
| X67877 | cytosolic resiniferatoxin-binding protein                                    | 13.5 | 8.7  |
| X67877 | cytosolic resiniferatoxin-binding protein                                    | 7.8  | 6.7  |
| X67948 | aquaporin 1                                                                  | 18.4 | 9.6  |
| X68041 | superoxide dismutase 3                                                       | 5.2  | 2.8  |
| X68101 | trg                                                                          | 30.9 | 20.1 |
| X68191 | solute carrier family 8, member 1                                            | 2.5  | 2    |
| X68199 | myosin Ib                                                                    | 17.2 | 5.9  |
| X68394 | neuroblastoma RAS viral (v-ras) oncogene homolog                             | 97.8 | 40.9 |
| X68400 | protein kinase C-eta                                                         | 4    | 3.1  |
| X68782 | R.norvegicus mRNA for Ig rearranged mu-chain C region, exons 2-4             | 6.5  | 4.7  |
| X68812 | solute carrier family 8, member 1                                            | 75.8 | 63.8 |
| X68878 | synaptosomal-associated protein, 91 kDa                                      | 2.9  | 1    |
| X69716 | Wilms tumor 1                                                                | 5.9  | 1.9  |
| X69767 | dystrophin                                                                   | 21.9 | 16.3 |
| X69834 | serine protease inhibitor 2.4 /cds                                           | 28.7 | 24   |
| X69903 | interleukin 4 receptor                                                       | 92.3 | 25.3 |
| X70141 | glycolipid-anchored form of acetylcholinesterase                             | 2.8  | 1.2  |
| X70223 | peroxisomal membrane protein 2                                               | 16.2 | 13.2 |
| X70369 | collagen, type III, alpha 1                                                  | 8.2  | 1.8  |
| X70521 | Sodium channel, nonvoltage-gated 1, alpha (epithelial)                       | 39.8 | 21.6 |
| X70662 | potassium voltage gated channel, shaker related subfamily, beta member 1     | 14.4 | 10.1 |
| X70667 | melanocortin-3 receptor                                                      | 37.7 | 12   |
| X70706 | plastin 3 (T-isoform)                                                        | 15.5 | 12.1 |
| X70900 | hepsin                                                                       | 28.7 | 12.8 |
| X71442 | LINE sequence /cds=UNKNOWN /gb=X71442 /gi=311509 /ug=Rn.21396 /len=1050      | 10.6 | 7.3  |
| X71463 | Burkitt lymphoma receptor 1                                                  | 6.8  | 4.3  |
| X71466 | matrix metalloproteinase 2 (72 KDa type IV collagenase)                      | 24.1 | 5.3  |
| X71898 | Plasminogen activator, urokinase receptor                                    | 97.1 | 32.5 |
| X71997 | myosin 1C                                                                    | 4.1  | 0.9  |
| X72758 | cox VIa gene (heart)                                                         | 2.9  | 0.7  |
| X72792 | alcohol dehydrogenase 1                                                      | 7.2  | 7.3  |
| X72914 | Cartilage oligomeric matrix protein                                          | 7.2  | 5.6  |
| X73292 | Cpg1 protein                                                                 | 4.2  | 3.9  |
| X73411 | small nuclear ribonucleoparticle-associated protein (snRNP) mRNA, clone Sm51 | 14   | 8.2  |
| X73524 | desmin                                                                       | 10.3 | 5.9  |
| X73579 | Fc receptor, IgE, low affinity II, alpha polypeptide                         | 23.6 | 11.1 |
| X73653 | glycogen synthase kinase 3 beta                                              | 15.4 | 14.7 |
| X74226 | LL5 protein                                                                  | 19.9 | 5.4  |
| X74227 | Inositol 1,4,5-trisphosphate 3-kinase B                                      | 10.8 | 6.9  |
| X74229 | VCS-beta1 mRNA                                                               | 2.7  | 1.5  |
| X74293 | integrin alpha 7                                                             | 17   | 9.2  |
| X74402 | GDP-dissociation inhibitor 1                                                 | 40.1 | 22.1 |
| X74549 | leuserpin-2                                                                  | 27.2 | 15.9 |
| X74565 | polypyrimidine tract binding protein                                         | 25.3 | 11.5 |
| X74593 | sorbitol dehydrogenase                                                       | 9.8  | 1.1  |
| X74800 | unconventional myosin Myr2 I heavy chain                                     | 42.9 | 19   |
| X74806 | VEGP2 gene                                                                   | 8.4  | 7.2  |
| X74832 | cholinergic receptor, nicotinic, alpha polypeptide 1                         | 21.7 | 24.3 |

|        |                                                                                                                               |      |      |
|--------|-------------------------------------------------------------------------------------------------------------------------------|------|------|
| X74833 | cholinergic receptor, nicotinic, beta polypeptide 1                                                                           | 25.6 | 30   |
| X74834 | cholinergic receptor, nicotinic, gamma polypeptide                                                                            | 53.4 | 14.8 |
| X74835 | cholinergic receptor, nicotinic, delta polypeptide                                                                            | 20.4 | 12.2 |
| X74836 | cholinergic receptor, nicotinic, epsilon polypeptide                                                                          | 9.3  | 4.2  |
| X74917 | T-cell receptor beta chain                                                                                                    | 8.8  | 8    |
| X74978 | prostatic acid phosphatase, exon 11                                                                                           | 7    | 5.1  |
| X75171 | ZFX gene                                                                                                                      | 1.2  | 0.7  |
| X75172 | ZFX gene                                                                                                                      | 1.5  | 1.1  |
| X75207 | cyclin D1                                                                                                                     | 36.8 | 17.6 |
| X75309 | alpha-2-glycoprotein 1, zinc                                                                                                  | 10   | 5.3  |
| X75785 | Synaptonemal complex protein 3                                                                                                | 8.3  | 7.3  |
| X76168 | gap junction membrane channel protein beta 4                                                                                  | 46   | 23.7 |
| X76452 | ATPase, Ca++ transporting, plasma membrane 4                                                                                  | 7.9  | 5.9  |
| X76453 | HRAS like suppressor                                                                                                          | 10.2 | 13.7 |
| X76454 | Reversion induced LIM gene                                                                                                    | 28.2 | 23.8 |
| X76456 | afamin                                                                                                                        | 20.1 | 8.4  |
| X76489 | CD9 antigen (p24)                                                                                                             | 39.8 | 16.1 |
| X76697 | CD52 antigen                                                                                                                  | 2.3  | 0.8  |
| X76723 | potassium voltage gated channel, shaker related subfamily, beta member 3                                                      | 9.8  | 2    |
| X76724 | potassium voltage gated channel, shaker related subfamily, beta member 2                                                      | 26.5 | 12.7 |
| X76988 | sialyltransferase 5                                                                                                           | 15.6 | 7    |
| X76996 | granzyme B                                                                                                                    | 2.9  | 1.3  |
| X77209 | Transcribed sequence with strong similarity to protein sp:P55063 (R.norvegicus) HS73_RAT HEAT SHOCK 70 KD PROTEIN 3 (HSP70.3) | 21.8 | 11.9 |
| X77235 | ADP-ribosylation-like 4                                                                                                       | 20.7 | 28.6 |
| X77237 | protein phosphatase 5, catalytic subunit                                                                                      | 8.2  | 9    |
| X77609 | Unconventional myosin from rat 3                                                                                              | 14.3 | 12.2 |
| X77818 | VCS-alpha3 gene                                                                                                               | 15.2 | 10   |
| X77932 | Sodium channel, nonvoltage-gated 1, beta (epithelial)                                                                         | 11.8 | 12.9 |
| X77933 | Sodium channel, nonvoltage-gated 1, gamma (epithelial)                                                                        | 12.9 | 7.5  |
| X77934 | amyloid beta (A4) precursor-like protein 2                                                                                    | 25   | 15.4 |
| X77934 | amyloid beta (A4) precursor-like protein 2                                                                                    | 5.1  | 4.1  |
| X78461 | potassium inwardly-rectifying channel, subfamily J, member 12                                                                 | 2    | 1.2  |
| X78593 | glycerol-3-phosphate dehydrogenase 2                                                                                          | 9.7  | 8.1  |
| X78593 | glycerol-3-phosphate dehydrogenase 2                                                                                          | 7    | 4.8  |
| X78603 | ADP-ribosylation factor related protein 1                                                                                     | 7.9  | 6    |
| X78605 | ras-related GTP-binding protein 4b                                                                                            | 68.9 | 37.7 |
| X78606 | RAB28, member RAS oncogene family                                                                                             | 41.7 | 29.9 |
| X78689 | eck-like sequence 1                                                                                                           | 6.1  | 3.1  |
| X78855 | solute carrier family 22, member 1                                                                                            | 12.1 | 8    |
| X78985 | CD5 antigen                                                                                                                   | 25.2 | 30.2 |
| X78997 | cadherin 17                                                                                                                   | 16.8 | 8.8  |
| X79081 | Cytochrome P450, subfamily IIC (mephenytoin 4-hydroxylase)                                                                    | 11.1 | 8.7  |
| X79208 | cholecystokinin B receptor                                                                                                    | 55.1 | 26.4 |
| X79321 | microtubule-associated protein tau                                                                                            | 21.8 | 18.6 |
| X79807 | coagulation factor 10                                                                                                         | 12.2 | 5    |
| X79860 | R.norvegicus H1SHR mRNA                                                                                                       | 19.5 | 13.3 |
| X80130 | alpha-actin cardiac protein                                                                                                   | 66.6 | 18.8 |
| X80187 | Bradykinin receptor B2                                                                                                        | 2.8  | 1.4  |
| X80290 | adenylate cyclase activating polypeptide 1                                                                                    | 31.1 | 25.6 |
| X80349 | R.norvegicus p56 mRNA                                                                                                         | 4.6  | 3.8  |
| X80395 | solute carrier family 18, member 3                                                                                            | 61.1 | 50.7 |
| X80477 | Purinergic receptor P2X, ligand-gated ion channel, 1                                                                          | 15.2 | 8.7  |
| X80535 | thyrotropin-releasing hormone degrading enzyme                                                                                | 18.5 | 35.6 |
| X80671 | olfactory receptor olp4                                                                                                       | 6.2  | 5.1  |
| X80778 | dihydroorotate dehydrogenase                                                                                                  | 3.3  | 1.4  |
| X81193 | cysteine-rich protein 3                                                                                                       | 18.8 | 9    |
| X81395 | carboxylesterase 1                                                                                                            | 12.7 | 8    |
| X81448 | keratin complex 1, acidic, gene 18                                                                                            | 4.3  | 3.4  |
| X81449 | keratin complex 1, acidic, gene 19                                                                                            | 5.7  | 7.7  |
| X81449 | keratin complex 1, acidic, gene 19                                                                                            | 4.1  | 4.9  |
| X82152 | fibromodulin                                                                                                                  | 2.7  | 1.5  |
| X82669 | RT1 class Ib gene                                                                                                             | 30.2 | 15.8 |
| X83094 | heat shock transcription factor 1                                                                                             | 18.9 | 11   |
| X83231 | pre-alpha-inhibitor, heavy chain 3                                                                                            | 26   | 6.3  |
| X83264 | vasopressin V2 receptor gene                                                                                                  | 21.6 | 7.4  |
| X83399 | eukaryotic translation initiation factor 4E                                                                                   | 19.7 | 10.3 |
| X83537 | matrix metalloproteinase 14, membrane-inserted                                                                                | 41.1 | 22.1 |
| X83546 | protein tyrosine phosphatase, receptor type, F                                                                                | 16.2 | 11.8 |
| X83579 | cyclin-dependent kinase 7 (MO15 homolog, Xenopus laevis, cdk-activating kinase)                                               | 4.7  | 4.5  |
| X83580 | potassium inwardly-rectifying channel, subfamily J, member 4                                                                  | 5.8  | 4.4  |
| X83581 | potassium inwardly-rectifying channel, subfamily J, member 16                                                                 | 4.1  | 2.4  |
| X83585 | potassium inwardly-rectifying channel, subfamily J, member 10                                                                 | 20.3 | 18.2 |
| X83671 | CRYBB2 gene                                                                                                                   | 28.1 | 18   |
| X83671 | CRYBB2 gene                                                                                                                   | 28.1 | 18   |
| X83715 | adducin 1, alpha                                                                                                              | 10.3 | 2.8  |
| X83735 | R.norvegicus mRNA for 6-phosphofructo-2-kinase/6-phosphofructo-2-kinase exons 1a',1b,1c,1d                                    | 92.2 | 50   |
| X83735 | R.norvegicus mRNA for 6-phosphofructo-2-kinase/6-phosphofructo-2-kinase exons 1a',1b,1c,1d                                    | 4    | 2.7  |
| X83735 | R.norvegicus mRNA for 6-phosphofructo-2-kinase/6-phosphofructo-2-kinase exons 1a',1b,1c,1d                                    | 2.6  | 1.3  |



|        |                                                                                                                                     |      |      |
|--------|-------------------------------------------------------------------------------------------------------------------------------------|------|------|
| X83747 | 5S rRNA                                                                                                                             | 40.3 | 22.3 |
| X83867 | cytochrome P450, subfamily 1B, polypeptide 1                                                                                        | 14.1 | 16.6 |
| X84039 | lumican                                                                                                                             | 12.9 | 8.1  |
| X84997 | variable coding sequence A1                                                                                                         | 9.8  | 6.2  |
| X85184 | GTP-binding protein ragB                                                                                                            | 43.6 | 25.1 |
| X86003 | neuron-derived orphan receptor                                                                                                      | 21   | 15.5 |
| X86086 | annexin VI                                                                                                                          | 9.6  | 9.5  |
| X86178 | azgp1 gene                                                                                                                          | 23   | 23   |
| X86178 | azgp1 gene                                                                                                                          | 2.5  | 0.9  |
| X86561 | alpha-fibrinogen                                                                                                                    | 10.1 | 11   |
| X86789 | synuclein, gamma                                                                                                                    | 9.7  | 8.2  |
| X87635 | potassium inwardly-rectifying channel, subfamily J, member 4                                                                        | 4.3  | 2.1  |
| X87884 | Mitochondrial capsule selenoprotein                                                                                                 | 22.7 | 23   |
| X87885 | G protein pathway suppressor 1                                                                                                      | 10.8 | 8.2  |
| X89383 | SNF related kinase                                                                                                                  | 12.2 | 14.4 |
| X89694 | TPCR04 protein                                                                                                                      | 15.2 | 7.7  |
| X89695 | olfactory receptor 30                                                                                                               | 66.5 | 45.8 |
| X89696 | TPCR06 protein                                                                                                                      | 39.4 | 24   |
| X89698 | TPCR09 protein                                                                                                                      | 66   | 36.2 |
| X89700 | TPCR12 protein                                                                                                                      | 22.2 | 17.5 |
| X89701 | TPCR13 protein                                                                                                                      | 66.2 | 60.8 |
| X89701 | TPCR13 protein                                                                                                                      | 31.6 | 25.7 |
| X89702 | TPCR18 protein                                                                                                                      | 25.5 | 19   |
| X89703 | TPCR19 protein                                                                                                                      | 9.6  | 9.6  |
| X89704 | TPCR21 protein                                                                                                                      | 5.9  | 5.8  |
| X89705 | TPCR38 protein                                                                                                                      | 29.2 | 16   |
| X89706 | TPCR44 protein                                                                                                                      | 8.6  | 4    |
| X89730 | Sry gene                                                                                                                            | 7    | 7.4  |
| X89963 | thrombospondin 4                                                                                                                    | 7.7  | 4.3  |
| X89968 | N-ethylmaleimide sensitive fusion protein attachment protein alpha                                                                  | 87.1 | 55.6 |
| X89968 | N-ethylmaleimide sensitive fusion protein attachment protein alpha                                                                  | 49   | 11.9 |
| X89999 | sperm adhesion molecule                                                                                                             | 5.2  | 7.4  |
| X89999 | sperm adhesion molecule                                                                                                             | 3.9  | 1.2  |
| X90355 | follicle stimulating hormone primary response gene 1                                                                                | 8.6  | 3.7  |
| X90475 | R.norvegicus mRNA for muscle C-protein                                                                                              | 11.6 | 14.8 |
| X90642 | ATP-binding cassette, sub-family C (CFTR/MRP), member 1                                                                             | 20.3 | 17.9 |
| X90651 | purinergic receptor P2X ligand-gated ion channel, 3                                                                                 | 25.1 | 9.7  |
| X90710 | alcohol dehydrogenase 4 (class II), pi polypeptide                                                                                  | 1.9  | 0.3  |
| X91234 | 17-beta hydroxysteroid dehydrogenase type 2                                                                                         | 4.8  | 1.8  |
| X91619 | Spinocerebellar ataxia type 1                                                                                                       | 3.7  | 1.7  |
| X91810 | signal transducer and activator of transcription 3                                                                                  | 13.6 | 11   |
| X91988 | signal transducer and activator of transcription 5B                                                                                 | 44.1 | 27.5 |
| X92069 | purinergic receptor P2X, ligand-gated ion channel, 5                                                                                | 5.9  | 3.2  |
| X92070 | purinergic receptor P2X-like 1                                                                                                      | 15.2 | 7.7  |
| X92184 | sodium channel, voltage-gated, type 10, alpha polypeptide                                                                           | 12.1 | 6.2  |
| X92747 | PTP-S gene                                                                                                                          | 3.5  | 1.8  |
| X93210 | endothelin A receptor                                                                                                               | 7    | 2.1  |
| X93219 | adenosine A3 receptor                                                                                                               | 36.5 | 6.4  |
| X93495 | microtubule-associated protein 6                                                                                                    | 25.4 | 10.3 |
| X94185 | dual specificity phosphatase 6                                                                                                      | 20.2 | 20.5 |
| X94186 | dual specificity phosphatase                                                                                                        | 89.4 | 27.6 |
| X94246 | Pax-8 protein                                                                                                                       | 54.1 | 29   |
| X94351 | CDC-like kinase 3                                                                                                                   | 21.7 | 9    |
| X94769 | choline dehydrogenase                                                                                                               | 21.1 | 14.8 |
| X95096 | Macrophage stimulating 1 (hepatocyte growth factor-like)                                                                            | 9.5  | 7.3  |
| X95188 | acyl-Coenzyme A oxidase 3, pristanoyl                                                                                               | 2.3  | 1.1  |
| X95189 | acyl-Coenzyme A oxidase 2, branched chain                                                                                           | 5.6  | 2.4  |
| X95272 | sperm outer dense fiber major protein 2                                                                                             | 5.7  | 4.3  |
| X95286 | Semaphorin 3a                                                                                                                       | 1    | 0.2  |
| X95466 | CPG2 protein                                                                                                                        | 5.9  | 2.8  |
| X95579 | gamma-aminobutyric acid A receptor, rho 1                                                                                           | 22   | 10.5 |
| X95850 | R.norvegicus mRNA for novel gene expressed in circadian manner, clone SCN8                                                          | 9.3  | 6.4  |
| X95882 | purinergic receptor P2X, ligand-gated ion channel, 7                                                                                | 10.8 | 7.9  |
| X95986 | carbonyl reductase 1                                                                                                                | 8.8  | 7.8  |
| X96394 | ATP-binding cassette, sub-family C (CFTR/MRP), member 1                                                                             | 9.1  | 8.5  |
| X96426 | Eukaryotic elongation factor 2 kinase                                                                                               | 36.8 | 17.9 |
| X96437 | PRG1 gene                                                                                                                           | 23.6 | 16.1 |
| X96790 | meotrophic glutamate receptor subtype 7b                                                                                            | 9.7  | 7.5  |
| X97121 | neurotensin receptor 2                                                                                                              | 19.7 | 14.7 |
| X97195 | MAFA gene                                                                                                                           | 9    | 5.8  |
| X97374 | prepronociceptin                                                                                                                    | 33.4 | 15.9 |
| X97477 | R.norvegicus mRNA for NKR-P1B protein                                                                                               | 2.1  | 0.5  |
| X97754 | hydroxysteroid 17-beta dehydrogenase 1                                                                                              | 17.9 | 13.7 |
| X97772 | 3-phosphoglycerate dehydrogenase                                                                                                    | 10.2 | 7.7  |
| X98170 | pancreas specific transcription factor, 1a                                                                                          | 2.5  | 1    |
| X98225 | hydroxyacyl-Coenzyme A dehydrogenase/3-ketoacyl-Coenzyme A hioase/enoyl-Coenzyme A hydratase (trifunctional protein), alpha subunit | 38   | 9.9  |
| X98377 | Emerin                                                                                                                              | 75.8 | 37.9 |
| X98377 | Emerin                                                                                                                              | 13   | 5.5  |

|        |                                                                                                   |       |      |
|--------|---------------------------------------------------------------------------------------------------|-------|------|
| X98399 | solute carrier family 14, member 1                                                                | 48.7  | 12.7 |
| X98490 | p32-subunit of replication protein A                                                              | 12.5  | 11.3 |
| X98517 | matrix metalloproteinase 12                                                                       | 20.4  | 17.4 |
| X98564 | neuronal potassium channel alpha subunit                                                          | 6.7   | 4.3  |
| X98746 | alcohol dehydrogenase 7 (class IV), mu or sigma polypeptide                                       | 7.8   | 9.8  |
| X99121 | RT6 gene                                                                                          | 29    | 16.2 |
| X99122 | T cell ecto-ADP-ribosyltransferase                                                                | 4     | 2.2  |
| X99124 | T cell ecto-ADP-ribosyltransferase                                                                | 15.2  | 6.8  |
| X99267 | presenilin-2                                                                                      | 8.6   | 11.2 |
| X99267 | presenilin-2                                                                                      | 6     | 5.1  |
| X99326 | striatin                                                                                          | 23.7  | 13.8 |
| X99330 | IP63 protein                                                                                      | 19.1  | 3.7  |
| X99337 | stromal cell derived factor receptor 1                                                            | 23.9  | 22.2 |
| X99338 | stromal cell derived factor receptor 1                                                            | 11.3  | 9.5  |
| X99470 | nuclear receptor subfamily 0, group B, member 1                                                   | 6.2   | 6.1  |
| X99477 | rpr-1 gene                                                                                        | 16.5  | 6.2  |
| X99723 | SWI/SNF related, matrix associated, actin dependent regulator of chromatin, subfamily a, member 4 | 5.2   | 1    |
| X99773 | serine (or cysteine) proteinase inhibitor, clade I (neuroserpin), member 2                        | 10.5  | 11.5 |
| X99794 | a disintegrin and metalloprotease domain 2                                                        | 10.5  | 4.7  |
| X99797 | testis specific X-linked gene                                                                     | 28.3  | 17.7 |
| X99901 | ott gene, containing repeat region                                                                | 1.7   | 0.8  |
| Y00156 | UDP-glucuronosyltransferase 2B3 precursor, microsomal                                             | 13.1  | 7.3  |
| Y00350 | uroporphyrinogen decarboxylase                                                                    | 21.6  | 13.8 |
| Y00396 | v-myc avian myelocytomatosis viral oncogene homolog                                               | 16.5  | 12.8 |
| Y00766 | Sodium channel, voltage-gated, type III, alpha polypeptide                                        | 53.4  | 26.5 |
| Y00766 | Sodium channel, voltage-gated, type III, alpha polypeptide                                        | 9.5   | 16.8 |
| Y00826 | nuclear pore membrane glycoprotein 210                                                            | 6.3   | 9.5  |
| Y07534 | cytochrome P450, family 27, subfamily a, polypeptide 1                                            | 12.5  | 3.4  |
| Y07659 | NT-4 gene                                                                                         | 8.7   | 5.6  |
| Y07704 | Best5 protein                                                                                     | 33.2  | 7.7  |
| Y07704 | Best5 protein                                                                                     | 29.5  | 14.2 |
| Y07903 | a disintegrin and metalloprotease domain 3 (cyritestin)                                           | 7.1   | 4.1  |
| Y08138 | dHand protein                                                                                     | 7.5   | 4.3  |
| Y08139 | dermo-1 protein                                                                                   | 8.3   | 9.4  |
| Y08140 | eHand protein                                                                                     | 30.3  | 8.7  |
| Y08358 | small inducible cytokine subfamily A11                                                            | 8.1   | 8.8  |
| Y08616 | a disintegrin and metalloproteinase domain 1 (fertilin alpha)                                     | 7.5   | 9.3  |
| Y08769 | calcium/calmodulin-dependent serine protein kinase                                                | 2.3   | 1.7  |
| Y08882 | laminin, alpha 5                                                                                  | 3.6   | 1    |
| Y08981 | synaptonemal complex protein 2                                                                    | 3.9   | 2.4  |
| Y09000 | dendrin                                                                                           | 56.3  | 24.4 |
| Y09111 | a disintegrin and metalloproteinase domain 6                                                      | 20.5  | 10.8 |
| Y09332 | brain acyl-CoA hydrolase                                                                          | 24.8  | 20.5 |
| Y09333 | mitochondrial acyl-CoA thioesterase 1                                                             | 47.3  | 23.5 |
| Y09333 | mitochondrial acyl-CoA thioesterase 1                                                             | 7.8   | 5.4  |
| Y09365 | G protein-coupled receptor kinase 6                                                               | 26.9  | 16.4 |
| Y09945 | putative integral membrane transport UST1r                                                        | 26.4  | 13.4 |
| Y10019 | cysteine knot superfamily 1, BMP antagonist 1                                                     | 7.5   | 7.4  |
| Y10258 | transformation related protein 63                                                                 | 1.8   | 0.6  |
| Y10619 | transcriptional regulator, Relax                                                                  | 1.5   | 0.3  |
| Y10823 | zona pellucida glycoprotein 3                                                                     | 13.8  | 14.6 |
| Y11283 | inter alpha-trypsin inhibitor, heavy chain 4                                                      | 12.5  | 8.4  |
| Y11321 | forkhead box E1 (thyroid transcription factor 2)                                                  | 33.2  | 16.3 |
| Y11433 | purinergic receptor P2Y, G-protein coupled 4                                                      | 12.1  | 6.9  |
| Y11489 | a disintegrin and metalloprotease domain (ADAM) 5                                                 | 2.4   | 0.9  |
| Y11490 | a disintegrin and metalloproteinase domain 18                                                     | 21.4  | 20.8 |
| Y11491 | a disintegrin and metalloprotease domain (ADAM) 4                                                 | 19.5  | 5.7  |
| Y12009 | chemokine (C-C) receptor 5                                                                        | 14.7  | 13.6 |
| Y12319 | rsca3 protein                                                                                     | 7.6   | 6.8  |
| Y12502 | coagulation factor XIIIa                                                                          | 12.5  | 5.8  |
| Y12517 | cytochrome b5, outer mitochondrial membrane isoform                                               | 9.7   | 8.3  |
| Y12760 | latent transforming growth factor beta binding protein 2                                          | 3.2   | 2.4  |
| Y13148 | p53-activated gene 608                                                                            | 14.8  | 16.3 |
| Y13223 | solute carrier family 6 (neurotransmitter transporter, noradrenalin), member 2                    | 4     | 2.1  |
| Y13275 | transmembrane 4 superfamily member 3                                                              | 2.1   | 0.9  |
| Y13336 | defender against cell death 1                                                                     | 199.9 | 58.5 |
| Y13381 | amphiphysin                                                                                       | 29.9  | 11.5 |
| Y13400 | chemokine (C-C) receptor 3                                                                        | 8.8   | 13.7 |
| Y13413 | amyloid beta (A4) precursor protein-binding, family B, member 3                                   | 8.4   | 6.7  |
| Y13590 | Calpastatin                                                                                       | 9.5   | 6    |
| Y13591 | Calpastatin                                                                                       | 6.9   | 9.4  |
| Y13972 | Rattus norvegicus mRNA for MHC class I-related protein, Mr1                                       | 25.5  | 15   |
| Y14635 | amiloride-sensitive cation channel 1                                                              | 21.4  | 11.9 |
| Y14706 | G protein-coupled receptor 5-1                                                                    | 43.5  | 10.7 |
| Y14933 | one cut domain, family member 1                                                                   | 2     | 1    |
| Y15068 | stress-induced-phosphoprotein 1 (Hsp70/Hsp90-organizing protein)                                  | 10.2  | 4.3  |
| Y15748 | 3-phosphoinositide dependent protein kinase-1                                                     | 4.3   | 3.5  |
| Y16188 | endothelin converting enzyme-like 1                                                               | 6.4   | 5.7  |
| Y16563 | bassoon                                                                                           | 3.3   | 0.9  |

|        |                                                                       |      |      |
|--------|-----------------------------------------------------------------------|------|------|
| Y16774 | Dri 27/ZnT4 protein                                                   | 22.1 | 11   |
| Y16898 | gap junction membrane channel protein alpha 9                         | 2.4  | 1    |
| Y17048 | calcium binding protein 1                                             | 8.1  | 9.4  |
| Y17048 | calcium binding protein 1                                             | 7.5  | 7.5  |
| Y17162 | Rattus norvegicus mRNA for G11 alpha subunit, 3'UTR, clone 243-7      | 10.5 | 1.5  |
| Y17164 | Gq-alpha subunit, 3'UTR, clone C23-24                                 | 15.6 | 9.7  |
| Y17258 | rhomboid (veinlet, Drosophila)-like                                   | 11   | 10.6 |
| Y17295 | peroxiredoxin 6                                                       | 23   | 16.4 |
| Y17606 | K+ voltage-gated channel, subfamily S, 1                              | 5.3  | 3.2  |
| Y17607 | Shab-related delayed-rectifier K+ channel (Kv9.3)                     | 7.5  | 3.1  |
| Y18208 | protein phosphatase 1 (GL-subunit)                                    | 6.9  | 4.9  |
| Z11504 | NPY-1 receptor                                                        | 20   | 14.1 |
| Z11548 | glutamate receptor, ionotropic, kainate 2                             | 12   | 10.4 |
| Z11558 | glia maturation factor, beta                                          | 68   | 21.6 |
| Z11581 | Glutamate receptor, ionotropic, kainate 5                             | 30.9 | 20   |
| Z11834 | POU domain, class 3, transcription factor 4                           | 26.4 | 12.7 |
| Z11932 | arginine vasopressin receptor 2                                       | 40   | 19   |
| Z11932 | arginine vasopressin receptor 2                                       | 7.6  | 7.5  |
| Z11995 | low density lipoprotein receptor-related protein associated protein 1 | 17.8 | 11.1 |
| Z11995 | low density lipoprotein receptor-related protein associated protein 1 | 8.8  | 9.6  |
| Z12152 | neurofilament 3, medium                                               | 16.4 | 14.6 |
| Z12158 | pyruvate dehydrogenase E1 alpha form 1 subunit                        | 26.7 | 15.7 |
| Z12298 | decorin                                                               | 41.7 | 11.1 |
| Z13993 | Androgen regulated 20 kDa protein                                     | 12.8 | 5.8  |
| Z14030 | TRAP-complex gamma subunit                                            | 6.1  | 2.4  |
| Z14117 | Platelet-derived growth factor                                        | 9.1  | 9.7  |
| Z14118 | Platelet-derived growth factor receptor alpha                         | 7.1  | 5.7  |
| Z14118 | Platelet-derived growth factor receptor alpha                         | 6.8  | 3.5  |
| Z14119 | Platelet-derived growth factor receptor, beta                         | 7.3  | 10   |
| Z14120 | Platelet-derived growth factor A chain                                | 5.2  | 5.3  |
| Z15158 | cAMP responsive element modulator                                     | 5    | 4.7  |
| Z17223 | mesenchyme homeo box 2                                                | 1.8  | 0.6  |
| Z17319 | phosphoglycerate mutase 2                                             | 23.5 | 24.5 |
| Z18630 | Tenascin-R (Restrictin, janusin, J1-160/180)                          | 5.2  | 7    |
| Z18878 | pyruvate dehydrogenase E1 alpha-like                                  | 6.3  | 6.8  |
| Z19552 | topoisomerase (DNA) 2 alpha                                           | 14.3 | 5.8  |
| Z21780 | nucleoporin 155kD                                                     | 12   | 10.3 |
| Z21935 | mitogen activated protein kinase 4                                    | 8.3  | 8.3  |
| Z22607 | Bone morphogenetic protein 4                                          | 9.8  | 9.6  |
| Z22812 | interleukin 1 receptor, type II                                       | 42.7 | 5.7  |
| Z22867 | phosphodiesterase 3B                                                  | 30   | 19.7 |
| Z23272 | adenylate cyclase activating polypeptide 1 receptor 1                 | 5.4  | 5.8  |
| Z24721 | superoxide dismutase 3                                                | 12.7 | 4.5  |
| Z27118 | heat shock 70kD protein 1A                                            | 3.2  | 1.9  |
| Z27513 | carbamoylphosphate synthase I                                         | 1.1  | 0.3  |
| Z28351 | 25-hydroxyvitamin D3 24-hydroxylase                                   | 45.1 | 37.4 |
| Z29649 | periaxin                                                              | 10.4 | 6.2  |
| Z30584 | ZG-16p protein                                                        | 6    | 6.4  |
| Z33403 | Luteinizing hormone/choriogonadotropin receptor                       | 11.5 | 7.4  |
| Z34004 | growth hormone releasing hormone                                      | 58.3 | 38.7 |
| Z34004 | growth hormone releasing hormone                                      | 11.5 | 6.7  |
| Z34264 | potassium voltage-gated channel, subfamily H (eag-related), member 1  | 7.5  | 5.1  |
| Z35138 | fibroblast growth factor receptor 2                                   | 5.5  | 2.8  |
| Z35654 | MCF.2 cell line derived transforming sequence-like                    | 2.4  | 1.6  |
| Z36944 | putative chloride channel (similar to Mm Clcn4-2)                     | 14.9 | 15.1 |
| Z36980 | D-dopachrome tautomerase                                              | 48.1 | 27.3 |
| Z36980 | D-dopachrome tautomerase                                              | 9.7  | 4.7  |
| Z38067 | c-myc, exon 2                                                         | 12.3 | 3.7  |
| Z38067 | c-myc, exon 2                                                         | 9.8  | 8.6  |
| Z46614 | caveolin                                                              | 12.2 | 20   |
| Z46882 | TOAD-64                                                               | 3.1  | 3.3  |
| Z46957 | Rhodopsin (retinitis pigmentosa 4, autosomal dominant)                | 17.2 | 17.6 |
| Z48225 | eukaryotic translation initiation factor 2B                           | 20   | 10.4 |
| Z49748 | m4 cholinergic muscarinic receptor                                    | 27.2 | 8.5  |
| Z49761 | R.norvegicus mRNA for RT1.Ma                                          | 34.4 | 16.8 |
| Z49858 | plasmolipin                                                           | 7.3  | 8.4  |
| Z50051 | Complement component 4 binding protein, alpha                         | 11.2 | 14.5 |
| Z50052 | Complement component 4 binding protein, beta                          | 6    | 4.5  |
| Z50084 | Ameloblastin                                                          | 10.5 | 8.9  |
| Z50144 | kynurenine aminotransferase 2                                         | 17.4 | 10   |
| Z50144 | kynurenine aminotransferase 2                                         | 8.8  | 2.4  |
| Z54212 | Epithelial membrane protein 1                                         | 6.5  | 3.7  |
| Z67744 | chloride channel 7                                                    | 6.3  | 8.8  |
| Z68145 | immunoglobulin lambda-5 chain                                         | 13.5 | 11.6 |
| Z69594 | platelet glycoprotein V                                               | 7.7  | 5.6  |
| Z75029 | R.norvegicus hsp70.2 mRNA for heat shock protein 70                   | 10.8 | 7    |
| Z78279 | collagen, type 1, alpha 1                                             | 48.7 | 33.6 |
| Z83757 | growth hormone receptor                                               | 7.1  | 13.9 |
| Z83757 | growth hormone receptor                                               | 3.5  | 5.2  |

|        |                                                                      |      |      |
|--------|----------------------------------------------------------------------|------|------|
| Z83869 | serine/threonine kinase                                              | 14.4 | 16.7 |
| Z96106 | potassium voltage-gated channel, subfamily H (eag-related), member 2 | 9.9  | 3.3  |
